# Supplementary material for: Sulfone-containing covalent organic frameworks for photocatalytic hydrogen evolution from water
Source: Springer Nature journal article supplement (doi:10.1038/s41557-018-0141-5), 2018-09-24
Supplement: 41557_2018_141_MOESM8_ESM.cif [file 41557_2018_141_MOESM8_ESM.cif]

data_Fused_Sulfone_Diamine_100K
_audit_creation_date              2018-03-19
_audit_creation_method
;
Olex2 1.2
(compiled 2017.08.10 svn.r3458 for OlexSys, GUI svn.r5381)
;
_shelx_SHELXL_version_number      '2014/7'
_publ_contact_author_address      ?
_publ_contact_author_email        ?
_publ_contact_author_id_orcid     ?
_publ_contact_author_name         ''
_publ_contact_author_phone        ?
_publ_section_references
;
Dolomanov, O.V., Bourhis, L.J., Gildea, R.J, Howard, J.A.K. & Puschmann, H.
 (2009), J. Appl. Cryst. 42, 339-341.
Sheldrick, G.M. (2015). Acta Cryst. C71, 3-8.
Evans, P. (2006) Acta Cryst. D62, 72-82.
Evans, P. R. and Murshudov, G. N. (2013) Acta Cryst. D69, 1204-1214.
Winn, M. D. et al. (2011) Acta Cryst. D67, 235-242.
Winter, G. (2010) J. Appl. Cryst. 43, 186-190.

Sheldrick, G.M. (2008). Acta Cryst. A64, 112-122.
;
_chemical_name_common             ?
_chemical_name_systematic         ?
_chemical_formula_moiety          'C18 H12 N2 O4 S2'
_chemical_formula_sum             'C18 H12 N2 O4 S2'
_chemical_formula_weight          384.42
_chemical_melting_point           ?
loop_
  _atom_type_symbol
  _atom_type_description
  _atom_type_scat_dispersion_real
  _atom_type_scat_dispersion_imag
  _atom_type_scat_source
 'C' 'C' 0.0030 0.0010 'International Tables Vol C Tables 4.2.6.8 and 6.1.1.4'
 'H' 'H' 0.0000 0.0000 'International Tables Vol C Tables 4.2.6.8 and 6.1.1.4'
 'N' 'N' 0.0060 0.0030 'International Tables Vol C Tables 4.2.6.8 and 6.1.1.4'
 'O' 'O' 0.0100 0.0060 'International Tables Vol C Tables 4.2.6.8 and 6.1.1.4'
 'S' 'S' 0.1190 0.1170 'International Tables Vol C Tables 4.2.6.8 and 6.1.1.4'

_shelx_space_group_comment
;
The symmetry employed for this shelxl refinement is uniquely defined
by the following loop, which should always be used as a source of
symmetry information in preference to the above space-group names.
They are only intended as comments.
;
_space_group_crystal_system       'monoclinic'
_space_group_IT_number            14
_space_group_name_H-M_alt         'P 1 21/c 1'
_space_group_name_Hall            '-P 2ybc'
loop_
  _space_group_symop_operation_xyz
 'x, y, z'
 '-x, y+1/2, -z+1/2'
 '-x, -y, -z'
 'x, -y-1/2, z-1/2'

_cell_length_a                    5.8666(2)
_cell_length_b                    10.0313(3)
_cell_length_c                    13.5015(4)
_cell_angle_alpha                 90
_cell_angle_beta                  97.082(3)
_cell_angle_gamma                 90
_cell_volume                      788.50(4)
_cell_formula_units_Z             2
_cell_measurement_reflns_used     6289
_cell_measurement_temperature     100
_cell_measurement_theta_max       34.8814490923
_cell_measurement_theta_min       2.45808164136
_shelx_estimated_absorpt_T_max    ?
_shelx_estimated_absorpt_T_min    ?
_exptl_absorpt_coefficient_mu     0.333
_exptl_absorpt_correction_T_min   0.989088483908
_exptl_absorpt_correction_T_max   1.0
_exptl_absorpt_correction_type    empirical
_exptl_absorpt_process_details    
;
CCP4 7.0.044: AIMLESS, version 0.5.32 : 29/03/17
Scaling & analysis of unmerged intensities, absorption correction using spherical harmonics
;
_exptl_absorpt_special_details    ?
_exptl_crystal_colour             red
_exptl_crystal_colour_primary     red
_exptl_crystal_density_diffrn     1.619
_exptl_crystal_density_meas       ?
_exptl_crystal_density_method     ?
_exptl_crystal_description        needle
_exptl_crystal_F_000              396
_exptl_crystal_size_max           0.037
_exptl_crystal_size_mid           0.01
_exptl_crystal_size_min           0.005
_exptl_transmission_factor_max    ?
_exptl_transmission_factor_min    ?
_diffrn_reflns_av_R_equivalents   0.0402
_diffrn_reflns_av_unetI/netI      0.0307
_diffrn_reflns_Laue_measured_fraction_full 0.987
_diffrn_reflns_Laue_measured_fraction_max 0.985
_diffrn_reflns_limit_h_max        7
_diffrn_reflns_limit_h_min        -7
_diffrn_reflns_limit_k_max        11
_diffrn_reflns_limit_k_min        -13
_diffrn_reflns_limit_l_max        17
_diffrn_reflns_limit_l_min        -17
_diffrn_reflns_number             9602
_diffrn_reflns_point_group_measured_fraction_full 0.987
_diffrn_reflns_point_group_measured_fraction_max 0.985
_diffrn_reflns_theta_full         24.415
_diffrn_reflns_theta_max          26.572
_diffrn_reflns_theta_min          2.947
_diffrn_ambient_temperature       100.0
_diffrn_detector                  'Photon counting pixel array'
_diffrn_detector_area_resol_mean  ?
_diffrn_detector_type             'PILATUS_2M_S_N_24_0107_Diamond'
_diffrn_measured_fraction_theta_full 0.987
_diffrn_measured_fraction_theta_max 0.985
_diffrn_measurement_device        'Fixed \c 3-circle diffractometer'
_diffrn_measurement_device_type   'Fluid Film Devices'
_diffrn_measurement_method        'shutterless scans'
_diffrn_radiation_collimation     '0.3 x 1.5 Double Pinhole'
_diffrn_radiation_monochromator   'Silicon 111'
_diffrn_radiation_probe           x-ray
_diffrn_radiation_type            'Synchrotron'
_diffrn_radiation_wavelength      0.6889
_diffrn_source                    Synchrotron
_diffrn_source_type               'Undulator, I19, DLS, RAL'
_reflns_Friedel_coverage          0.000
_reflns_Friedel_fraction_full     .
_reflns_Friedel_fraction_max      .
_reflns_number_gt                 1578
_reflns_number_total              1776
_reflns_special_details
;
 Reflections were merged by SHELXL according to the crystal
 class for the calculation of statistics and refinement.
 
 _reflns_Friedel_fraction is defined as the number of unique
 Friedel pairs measured divided by the number that would be
 possible theoretically, ignoring centric projections and
 systematic absences.
;
_reflns_threshold_expression      'I > 2\s(I)'
_computing_cell_refinement        ?
_computing_data_collection
'Diamond Light Source I19, UK, data collection software'
_computing_data_reduction         ?
_computing_molecular_graphics     'Olex2 (Dolomanov et al., 2009)'
_computing_publication_material   'Olex2 (Dolomanov et al., 2009)'
_computing_structure_refinement   'XL (Sheldrick, 2008)'
_computing_structure_solution     ?
_refine_diff_density_max          0.982
_refine_diff_density_min          -0.624
_refine_diff_density_rms          0.085
_refine_ls_extinction_coef        .
_refine_ls_extinction_method      none
_refine_ls_goodness_of_fit_ref    1.034
_refine_ls_hydrogen_treatment     mixed
_refine_ls_matrix_type            full
_refine_ls_number_parameters      114
_refine_ls_number_reflns          1776
_refine_ls_number_restraints      1
_refine_ls_R_factor_all           0.0550
_refine_ls_R_factor_gt            0.0496
_refine_ls_restrained_S_all       1.034
_refine_ls_shift/su_max           0.000
_refine_ls_shift/su_mean          0.000
_refine_ls_structure_factor_coef  Fsqd
_refine_ls_weighting_details
'w=1/[\s^2^(Fo^2^)+(0.0710P)^2^+1.1610P] where P=(Fo^2^+2Fc^2^)/3'
_refine_ls_weighting_scheme       calc
_refine_ls_wR_factor_gt           0.1308
_refine_ls_wR_factor_ref          0.1353
_refine_special_details           ?
_olex2_refinement_description
;
1. Fixed Uiso
 At 1.2 times of:
  All C(H) groups
2. Restrained distances
 C6-N1 \\sim N1-C8
 with sigma of 0.01
3.a Aromatic/amide H refined with riding coordinates:
 C2(H2), C6(H6), C8(H8), C9(H9)
3.b Fitted hexagon refined as free rotating group:
 C5(C6,C7,C8,C9,C4)
;
_atom_sites_solution_hydrogens    mixed
_atom_sites_solution_primary      ?
_atom_sites_solution_secondary    ?
loop_
  _atom_site_label
  _atom_site_type_symbol
  _atom_site_fract_x
  _atom_site_fract_y
  _atom_site_fract_z
  _atom_site_U_iso_or_equiv
  _atom_site_adp_type
  _atom_site_occupancy
  _atom_site_site_symmetry_order
  _atom_site_calc_flag
  _atom_site_refinement_flags_posn
  _atom_site_refinement_flags_adp
  _atom_site_refinement_flags_occupancy
  _atom_site_disorder_assembly
  _atom_site_disorder_group
 S1 S 0.23776(9) 0.24091(5) 0.43963(4) 0.0201(2) Uani 1 1 d . . . . .
 O1 O 0.1044(3) 0.12182(17) 0.45022(12) 0.0257(4) Uani 1 1 d . . . . .
 O2 O 0.3291(3) 0.25729(16) 0.34573(13) 0.0261(4) Uani 1 1 d . . . . .
 N1 N 0.9931(4) 0.1390(2) 0.67202(16) 0.0270(5) Uani 1 1 d D . . . .
 C1 C -0.0862(4) 0.6141(2) 0.53163(16) 0.0203(4) Uani 1 1 d . . . . .
 C2 C 0.1176(4) 0.5697(2) 0.58358(16) 0.0215(5) Uani 1 1 d . . . . .
 H2 H 0.1933 0.6180 0.6386 0.026 Uiso 1 1 calc R . . . .
 C3 C 0.2067(4) 0.4508(2) 0.55134(16) 0.0200(4) Uani 1 1 d . . . . .
 C5 C 0.4502(2) 0.26296(13) 0.53869(9) 0.0206(5) Uani 1 1 d . . . . .
 C6 C 0.6422(2) 0.18345(12) 0.56504(10) 0.0223(5) Uani 1 1 d DG . . . .
 H6 H 0.6643 0.1049 0.5281 0.027 Uiso 1 1 calc R . . . .
 C7 C 0.8018(2) 0.21881(13) 0.64551(10) 0.0221(5) Uani 1 1 d G . . . .
 C8 C 0.7695(2) 0.33369(14) 0.69963(9) 0.0239(5) Uani 1 1 d DG . . . .
 H8 H 0.8786 0.3579 0.7546 0.029 Uiso 1 1 calc R . . . .
 C9 C 0.5775(2) 0.41321(12) 0.67328(10) 0.0229(5) Uani 1 1 d G . . . .
 H9 H 0.5554 0.4917 0.7103 0.028 Uiso 1 1 calc R . . . .
 C4 C 0.4179(2) 0.37785(13) 0.59281(10) 0.0206(5) Uani 1 1 d G . . . .
 H1A H 1.112(6) 0.171(4) 0.707(3) 0.044(9) Uiso 1 1 d . . . . .
 H1B H 1.021(6) 0.073(4) 0.631(3) 0.056(11) Uiso 1 1 d . . . . .

loop_
  _atom_site_aniso_label
  _atom_site_aniso_U_11
  _atom_site_aniso_U_22
  _atom_site_aniso_U_33
  _atom_site_aniso_U_23
  _atom_site_aniso_U_13
  _atom_site_aniso_U_12
 S1 0.0236(3) 0.0173(3) 0.0186(3) -0.00231(19) -0.0002(2) 0.0019(2)
 O1 0.0289(9) 0.0195(8) 0.0277(8) -0.0035(7) -0.0001(7) -0.0006(7)
 O2 0.0313(9) 0.0266(9) 0.0205(8) -0.0012(6) 0.0035(7) 0.0045(7)
 N1 0.0279(11) 0.0259(11) 0.0254(10) -0.0050(8) -0.0037(8) 0.0058(9)
 C1 0.0252(11) 0.0157(10) 0.0204(10) -0.0010(8) 0.0042(8) 0.0014(8)
 C2 0.0254(11) 0.0194(10) 0.0192(10) -0.0018(8) 0.0012(8) -0.0015(9)
 C3 0.0228(10) 0.0177(10) 0.0194(10) -0.0002(8) 0.0021(8) -0.0009(8)
 C5 0.0221(11) 0.0205(11) 0.0189(10) 0.0008(8) 0.0012(8) -0.0012(8)
 C6 0.0254(11) 0.0176(11) 0.0237(11) -0.0016(8) 0.0018(9) 0.0026(9)
 C7 0.0242(11) 0.0203(11) 0.0215(11) 0.0029(8) 0.0021(9) -0.0007(9)
 C8 0.0277(11) 0.0228(11) 0.0200(10) -0.0004(8) -0.0015(9) -0.0023(9)
 C9 0.0284(12) 0.0179(10) 0.0218(10) -0.0025(8) 0.0007(9) -0.0016(9)
 C4 0.0230(11) 0.0184(10) 0.0205(10) 0.0010(8) 0.0031(8) 0.0003(8)

_geom_special_details
;
 All esds (except the esd in the dihedral angle between two l.s. planes)
 are estimated using the full covariance matrix.  The cell esds are taken
 into account individually in the estimation of esds in distances, angles
 and torsion angles; correlations between esds in cell parameters are only
 used when they are defined by crystal symmetry.  An approximate (isotropic)
 treatment of cell esds is used for estimating esds involving l.s. planes.
;
loop_
  _geom_bond_atom_site_label_1
  _geom_bond_atom_site_label_2
  _geom_bond_distance
  _geom_bond_site_symmetry_2
  _geom_bond_publ_flag
 S1 O1 1.4448(18) . ?
 S1 O2 1.4453(18) . ?
 S1 C1 1.772(2) 3_566 ?
 S1 C5 1.7265(11) . ?
 N1 C7 1.389(2) . ?
 N1 H1A 0.86(4) . ?
 N1 H1B 0.89(4) . ?
 C1 S1 1.772(2) 3_566 ?
 C1 C2 1.384(3) . ?
 C1 C3 1.408(3) 3_566 ?
 C2 H2 0.9500 . ?
 C2 C3 1.394(3) . ?
 C3 C1 1.408(3) 3_566 ?
 C3 C4 1.487(2) . ?
 C5 C6 1.3900 . ?
 C5 C4 1.3900 . ?
 C6 H6 0.9500 . ?
 C6 C7 1.3900 . ?
 C7 C8 1.3900 . ?
 C8 H8 0.9500 . ?
 C8 C9 1.3900 . ?
 C9 H9 0.9500 . ?
 C9 C4 1.3900 . ?

loop_
  _geom_angle_atom_site_label_1
  _geom_angle_atom_site_label_2
  _geom_angle_atom_site_label_3
  _geom_angle
  _geom_angle_site_symmetry_1
  _geom_angle_site_symmetry_3
  _geom_angle_publ_flag
 O1 S1 O2 116.40(10) . . ?
 O1 S1 C1 111.36(11) . 3_566 ?
 O1 S1 C5 112.17(9) . . ?
 O2 S1 C1 110.44(10) . 3_566 ?
 O2 S1 C5 110.77(10) . . ?
 C5 S1 C1 93.39(9) . 3_566 ?
 C7 N1 H1A 120(2) . . ?
 C7 N1 H1B 118(2) . . ?
 H1A N1 H1B 115(3) . . ?
 C2 C1 S1 125.38(17) . 3_566 ?
 C2 C1 C3 124.9(2) . 3_566 ?
 C3 C1 S1 109.71(17) 3_566 3_566 ?
 C1 C2 H2 121.6 . . ?
 C1 C2 C3 116.8(2) . . ?
 C3 C2 H2 121.6 . . ?
 C1 C3 C4 112.66(18) 3_566 . ?
 C2 C3 C1 118.3(2) . 3_566 ?
 C2 C3 C4 129.08(19) . . ?
 C6 C5 S1 127.56(8) . . ?
 C6 C5 C4 120.0 . . ?
 C4 C5 S1 112.40(8) . . ?
 C5 C6 H6 120.0 . . ?
 C7 C6 C5 120.0 . . ?
 C7 C6 H6 120.0 . . ?
 N1 C7 C6 119.96(12) . . ?
 N1 C7 C8 120.04(12) . . ?
 C6 C7 C8 120.0 . . ?
 C7 C8 H8 120.0 . . ?
 C7 C8 C9 120.0 . . ?
 C9 C8 H8 120.0 . . ?
 C8 C9 H9 120.0 . . ?
 C4 C9 C8 120.0 . . ?
 C4 C9 H9 120.0 . . ?
 C5 C4 C3 111.79(12) . . ?
 C9 C4 C3 128.19(12) . . ?
 C9 C4 C5 120.0 . . ?

loop_
  _geom_hbond_atom_site_label_D
  _geom_hbond_atom_site_label_H
  _geom_hbond_atom_site_label_A
  _geom_hbond_distance_DH
  _geom_hbond_distance_HA
  _geom_hbond_distance_DA
  _geom_hbond_angle_DHA
  _geom_hbond_site_symmetry_A
 N1 H1A O2 0.86(4) 2.24(4) 3.054(3) 157(3) 4_666
 N1 H1B O1 0.89(4) 2.59(4) 3.147(3) 121(3) 1_655
 N1 H1B O1 0.89(4) 2.32(4) 3.109(3) 148(3) 3_656

_shelx_res_file
;
    xw_fused_sulfone_diamine_100k.res created by SHELXL-2014/7

TITL shelxt_a.res in P2(1)/c
REM Old TITL shelxt in P21/c #14
REM SHELXT solution in P2(1)/c
REM R1 0.082, Rweak 0.003, Alpha 0.023, Orientation as input
REM Formula found by SHELXT: C9 N O2 Cl
CELL 0.6889 5.8666 10.0313 13.5015 90 97.082 90
ZERR 2 0.0002 0.0003 0.0004 0 0.003 0
LATT 1
SYMM -X,0.5+Y,0.5-Z
SFAC C H N O S
DISP C 0.003 0.001 10.64
DISP H -0 0 0.67
DISP N 0.006 0.003 18.02
DISP O 0.01 0.006 29.59
DISP S 0.119 0.117 478.92
UNIT 36 24 4 8 4
EQIV $1 1+X,+Y,+Z
EQIV $2 1-X,-Y,1-Z
EQIV $3 1+X,0.5-Y,0.5+Z
SADI 0.01 C6 N1 N1 C8

L.S. 50
PLAN  20
TEMP -173.15
HTAB N1 O1_$1
HTAB N1 O1_$2
HTAB N1 O2_$3
BOND $H
LIST 6
fmap 2
acta
SHEL 999 0.77
OMIT -1 0 4
REM <olex2.extras>
REM <HklSrc "%.\\XW_Fused_Sulfone_Diamine_100K.hkl">
REM </olex2.extras>

WGHT    0.071000    1.161000
FVAR       0.78211
S1    5    0.237761    0.240915    0.439629    11.00000    0.02362    0.01732 =
         0.01859   -0.00231   -0.00022    0.00190
O1    4    0.104375    0.121822    0.450219    11.00000    0.02893    0.01948 =
         0.02766   -0.00351   -0.00006   -0.00058
O2    4    0.329118    0.257286    0.345731    11.00000    0.03126    0.02658 =
         0.02049   -0.00123    0.00348    0.00453
N1    3    0.993090    0.139012    0.672024    11.00000    0.02793    0.02588 =
         0.02535   -0.00497   -0.00373    0.00584
C1    1   -0.086218    0.614146    0.531629    11.00000    0.02522    0.01571 =
         0.02038   -0.00102    0.00422    0.00136
C2    1    0.117631    0.569697    0.583585    11.00000    0.02541    0.01945 =
         0.01916   -0.00178    0.00123   -0.00148
AFIX  43
H2    2    0.193290    0.617967    0.638632    11.00000   -1.20000
AFIX   0
C3    1    0.206723    0.450760    0.551344    11.00000    0.02281    0.01773 =
         0.01938   -0.00021    0.00214   -0.00092
AFIX  66
C5    1    0.450248    0.262964    0.538694    11.00000    0.02207    0.02054 =
         0.01889    0.00081    0.00116   -0.00125
C6    1    0.642196    0.183448    0.565044    11.00000    0.02541    0.01764 =
         0.02369   -0.00160    0.00183    0.00257
AFIX  43
H6    2    0.664299    0.104932    0.528057    11.00000   -1.20000
AFIX  65
C7    1    0.801804    0.218812    0.645510    11.00000    0.02419    0.02035 =
         0.02153    0.00291    0.00207   -0.00071
C8    1    0.769466    0.333693    0.699628    11.00000    0.02772    0.02279 =
         0.01997   -0.00036   -0.00148   -0.00235
AFIX  43
H8    2    0.878552    0.357862    0.754624    11.00000   -1.20000
AFIX  65
C9    1    0.577519    0.413210    0.673280    11.00000    0.02845    0.01793 =
         0.02184   -0.00247    0.00069   -0.00160
AFIX  43
H9    2    0.555418    0.491725    0.710268    11.00000   -1.20000
AFIX  65
C4    1    0.417908    0.377847    0.592813    11.00000    0.02299    0.01840 =
         0.02045    0.00100    0.00314    0.00027
AFIX   0
H1A   2    1.112442    0.170924    0.707362    11.00000    0.04424
H1B   2    1.021001    0.073216    0.630721    11.00000    0.05630
HKLF 4

REM  shelxt_a.res in P2(1)/c
REM R1 =  0.0496 for    1578 Fo > 4sig(Fo)  and  0.0550 for all    1776 data
REM    114 parameters refined using      1 restraints

END

WGHT      0.0713      1.1135

REM Highest difference peak  0.982,  deepest hole -0.624,  1-sigma level  0.085
Q1    1   0.5066  0.2538  0.5528  11.00000  0.05    0.98
Q2    1   0.6419  0.1556  0.5507  11.00000  0.05    0.74
Q3    1   0.3590  0.4053  0.5847  11.00000  0.05    0.72
Q4    1   0.3503  0.2464  0.4883  11.00000  0.05    0.71
Q5    1   0.8534  0.1964  0.6448  11.00000  0.05    0.61
Q6    1   0.7056  0.3543  0.6843  11.00000  0.05    0.55
Q7    1  -0.1312  0.6980  0.5443  11.00000  0.05    0.39
Q8    1   0.4867  0.4031  0.6388  11.00000  0.05    0.38
Q9    1   0.1528  0.4224  0.5183  11.00000  0.05    0.35
Q10   1   0.7627  0.2155  0.5970  11.00000  0.05    0.33
Q11   1   0.1061  0.1995  0.4248  11.00000  0.05    0.32
Q12   1   0.1509  0.5015  0.5744  11.00000  0.05    0.32
Q13   1   0.0265  0.5822  0.5578  11.00000  0.05    0.31
Q14   1   0.3159  0.2439  0.3940  11.00000  0.05    0.31
Q15   1   0.7341  0.2754  0.6796  11.00000  0.05    0.26
Q16   1   0.0001  0.1216  0.4129  11.00000  0.05    0.22
Q17   1   0.4858  0.2555  0.3778  11.00000  0.05    0.21
Q18   1   0.8154  0.3054  0.6568  11.00000  0.05    0.21
Q19   1   0.4593  0.1474  0.5439  11.00000  0.05    0.21
Q20   1   0.5927 -0.0182  0.5306  11.00000  0.05    0.20
;
_shelx_res_checksum               80956
_shelx_hkl_file
;
   9   0  -3   -2.47    2.15
   9   0  -4   35.25    3.28
   9   0  -5   -2.01    2.27
   9   0  -6   21.45    2.94
   9   0  -7   -9.66    2.63
   9   0  -8   11.81    2.85
  -9   0   9    0.14    2.26
   9   0  -9   -2.70    2.77
  -9   0  10    0.96    2.23
   9   0 -10   -2.25    2.93
  -9   0  11   -1.48    2.09
   9   0 -11    1.78    2.88
   9  -1  -1    1.46    2.38
   9  -1  -2    9.49    2.45
   9  -1  -3   -1.34    2.23
   9   1  -3    0.17    2.11
   9  -1  -4   11.77    2.43
   9   1  -4   14.42    2.54
   9   1  -5    0.74    2.36
   9   1  -6   -1.02    2.46
   9   1  -7   -5.22    2.61
   9  -1  -8    0.88    2.62
   9  -1  -9    1.41    2.70
   9   1  -9    2.63    2.87
  -9   1  10   37.21    3.35
   9  -1 -10   29.27    3.87
   9   1 -10   32.62    3.74
   9  -1 -11    0.47    2.99
   9   1 -11    2.29    3.01
  -9  -1  11   -1.43    2.09
   9  -2  -1    5.12    2.52
   9  -2  -2    2.64    2.45
   9  -2  -4   11.86    2.53
   9   2  -4   12.19    2.49
   9  -2  -5    0.80    2.31
   9   2  -7    1.04    2.65
   9   2  -8    0.21    2.78
  -9  -2   8    0.28    2.27
   9   2  -9    5.17    2.91
  -9  -2   9    3.40    2.31
   9   2 -10    2.68    2.85
  -9  -2  10   -6.36    2.12
  -9  -2  11   -4.73    2.12
   9  -3  -2   81.03    6.08
   9  -3  -3   -4.42    2.72
   9  -3  -4    2.53    2.65
   9  -3  -5   20.00    3.01
   9   3  -5   23.34    2.90
   9   3  -6   16.63    2.96
   9   3  -7   11.12    2.96
   9   3  -8    4.13    2.84
   9   3  -9    9.09    2.91
  -9  -3  10   42.01    3.57
  -9  -3  11    0.51    2.08
   9  -4  -1    0.00    2.75
   9  -4  -2    4.73    2.85
   9  -4  -3    4.84    2.77
   9  -4  -4   21.97    3.16
   9  -4  -5    9.06    2.60
   9   4  -6   55.55    4.72
   9   4  -7   -0.46    2.84
   9   4  -8   13.30    2.91
   9  -5  -1    2.76    2.79
  -9  -5   1    1.62    2.32
   9  -5  -2   40.82    3.99
   9  -5  -3    3.90    2.78
   9  -5  -5   16.65    2.90
   9  -5  -6    1.17    2.49
  -9  -6   1    1.15    2.21
  -9  -6   2   20.67    2.75
   8   0  -1    0.68    2.10
   8   0  -2  115.65    7.96
   8   0  -3    0.74    2.04
   8   0  -4   43.76    3.75
  -8   0   6   13.19    2.42
   8   0  -6   15.80    2.68
  -8   0   7    0.07    2.21
   8   0  -7    2.49    2.61
  -8   0   8   64.46    4.84
   8   0  -8   67.24    5.17
   8   0  -9    0.56    2.79
  -8   0  10    2.85    2.20
   8   0 -10    2.16    2.96
  -8   0  11   -4.46    2.21
   8   0 -11   -5.27    3.02
  -8   0  12   10.32    2.36
   8   0 -12    8.94    3.07
  -8   0  13    0.29    2.40
   8   0 -13    0.91    3.07
  -8   0  14    5.94    2.36
   8   0 -14    6.94    2.99
   8  -1  -1   13.65    2.44
   8   1  -1   11.54    2.33
   8  -1  -2    1.33    2.06
   8   1  -2    0.43    2.02
   8  -1  -3    6.41    2.25
   8  -1  -4   42.72    3.85
   8   1  -4   48.14    3.86
   8  -1  -5   15.12    2.49
   8   1  -5   13.99    2.59
   8  -1  -6    8.04    2.44
   8   1  -6    8.81    2.60
  -8  -1   6    6.25    2.31
  -8   1   7    3.12    2.19
   8   1  -7    1.12    2.52
  -8  -1   7    1.67    2.03
  -8   1   8   34.96    3.18
   8  -1  -8   26.85    3.45
   8   1  -8   27.28    3.67
  -8  -1   8   36.85    3.09
  -8   1   9    9.67    2.22
   8  -1  -9   11.11    3.14
   8   1  -9    6.44    2.88
  -8  -1   9   11.36    2.33
  -8   1  10   31.43    3.07
   8  -1 -10   34.86    3.79
   8   1 -10   34.39    3.73
  -8  -1  10   31.60    3.19
  -8   1  11   22.96    2.68
   8  -1 -11   20.52    3.38
  -8  -1  11   18.78    2.66
  -8   1  12    5.95    2.19
   8  -1 -12    6.87    3.18
  -8   1  13   15.76    2.52
   8  -1 -13   20.98    3.30
   8   1 -13   15.31    3.20
  -8   1  14    3.48    2.19
   8  -1 -14    2.63    2.88
   8   1 -14    3.90    3.06
  -8  -1  14    1.61    2.35
   8  -2  -1    4.00    2.39
   8  -2  -2  105.37    7.35
   8  -2  -3    0.74    2.19
   8  -2  -4   27.84    3.00
   8  -2  -5    8.40    2.28
   8  -2  -6    4.55    2.29
   8   2  -6    1.18    2.38
   8  -2  -7    5.48    2.54
   8   2  -7   11.42    2.76
  -8  -2   7   12.08    2.21
  -8   2   8   41.36    3.70
   8  -2  -8   39.03    3.93
  -8  -2   8   48.13    3.63
  -8   2   9    0.84    2.16
   8  -2  -9    1.10    2.73
  -8  -2   9    2.64    2.23
  -8   2  10   41.42    3.59
   8   2 -10   44.23    4.15
  -8  -2  10   45.87    3.75
  -8   2  11    1.16    2.36
   8   2 -11    2.02    2.74
  -8  -2  11    0.74    2.39
  -8   2  12   47.89    3.90
   8  -2 -12   39.46    4.40
   8   2 -12   54.29    4.42
  -8  -2  12   48.08    4.05
  -8   2  13   10.94    2.37
   8  -2 -13   14.96    3.18
   8   2 -13   13.99    3.06
  -8  -2  13   11.81    2.61
   8  -2 -14    2.94    3.00
  -8  -2  14    3.27    2.31
   8  -3  -1    5.25    2.67
  -8  -3   1    0.26    2.18
   8  -3  -2    1.89    2.60
  -8  -3   2   -1.49    2.15
  -8  -3   6   70.48    5.20
   8  -3  -7    4.69    2.53
   8   3  -7    1.17    2.64
  -8  -3   7    5.00    2.09
   8  -3  -8   17.74    2.95
   8   3  -8   20.34    3.04
  -8  -3   8   19.94    2.63
  -8   3   9   -3.33    2.16
   8  -3  -9    0.20    2.67
   8   3  -9    0.65    2.80
  -8   3  10    1.58    2.10
   8  -3 -10   -4.28    2.93
   8   3 -10    0.32    2.70
  -8  -3  10   -6.99    2.44
   8  -3 -11    8.04    3.02
   8   3 -11    4.53    2.76
  -8  -3  11    4.43    2.42
  -8   3  12   26.63    3.08
   8  -3 -12   30.76    3.69
   8   3 -12   24.33    3.47
  -8  -3  12   33.64    3.21
  -8   3  13    2.05    2.26
   8  -3 -13    2.96    2.96
   8   3 -13    5.10    2.76
  -8  -3  13    4.01    2.35
   8  -3 -14   59.24    4.67
  -8  -3  14   48.81    4.26
   8  -4  -2   22.81    3.22
  -8  -4   2   26.79    2.86
   8  -4  -3    1.07    2.50
   8  -4  -4   -4.66    2.51
  -8  -4   7    4.95    2.09
   8   4  -8    5.96    2.83
  -8  -4   8    9.14    2.31
   8   4  -9    3.60    2.69
  -8  -4   9   -3.85    2.26
  -8   4  10   14.77    2.44
   8  -4 -10   17.91    3.27
   8   4 -10   11.41    2.88
  -8  -4  10   14.51    2.66
  -8   4  11    2.88    2.22
   8  -4 -11    0.11    2.99
   8   4 -11    4.25    2.63
  -8  -4  11    2.85    2.42
  -8   4  12   18.48    2.78
   8  -4 -12   24.26    3.38
   8   4 -12   21.93    3.17
  -8  -4  12   23.69    2.87
   8  -4 -13    0.12    2.87
   8  -4 -14    0.65    2.83
   8  -5  -1   -2.84    2.80
  -8  -5   1   -2.15    2.29
   8  -5  -2   25.34    3.20
  -8  -5   2   23.50    2.81
   8  -5  -3   57.95    4.68
  -8  -5   3   56.80    4.54
   8  -5  -4   40.45    3.77
   8  -5  -5    0.51    2.36
   8   5  -8   46.17    3.98
   8   5  -9    0.05    2.37
   8   5 -10   -0.43    2.51
  -8  -5  10    2.62    2.43
  -8   5  11    1.95    2.14
  -8  -5  11    2.53    2.46
  -8  -5  13   -2.47    2.33
   8  -6  -1   22.13    3.35
  -8  -6   1   31.33    3.05
   8  -6  -2   31.02    3.53
  -8  -6   2   33.11    3.23
   8  -6  -3    1.71    2.40
  -8  -6   3    2.27    2.19
   8  -6  -4    5.97    2.44
  -8  -6   4    8.83    2.33
   8  -6  -5   20.21    2.86
   8   6 -10    0.68    2.51
   8  -7  -1    7.85    2.78
  -8  -7   1    8.19    2.35
   8  -7  -2    2.11    2.60
  -8  -7   2    2.87    2.28
  -8  -7   3   30.82    3.17
   8  -7  -4   10.23    2.66
   8  -7  -5   11.36    2.55
   8  -7  -6   18.89    2.82
   8  -7  -7    1.24    2.35
   8   7  -9    6.73    2.48
  -8  -8   1   -1.38    2.27
   8  -8  -2   29.81    3.36
   8  -8  -3   -2.03    2.51
  -8  -8   3    0.37    2.21
   8  -8  -4   33.02    3.57
  -8  -8   4   38.56    3.48
   8  -8  -5   12.87    2.62
   8  -8  -6    5.24    2.39
   8  -8  -7   15.04    2.79
   7   0  -1    1.33    1.83
   7   0  -4   97.51    6.77
   7   0  -5    2.08    2.26
  -7   0   6  415.51   26.84
   7   0  -6  427.71   26.96
  -7   0   7    0.37    2.10
   7   0  -7   -2.93    2.42
  -7   0   8   97.25    6.68
  -7   0   9    2.05    2.24
   7   0  -9    2.33    2.69
  -7   0  10   95.28    6.44
   7   0 -10   87.14    6.70
  -7   0  11   -0.78    2.19
   7   0 -11    0.00    2.78
  -7   0  12   13.14    2.45
   7   0 -12   12.99    3.06
  -7   0  13    1.78    2.34
   7   0 -13    3.25    2.86
   7   0 -14  299.87   19.39
   7   0 -15   -1.61    2.76
  -7   0  16   83.28    5.99
   7   0 -16   84.39    6.31
   7  -1  -1    0.06    1.94
  -7  -1   1    0.32    2.07
   7  -1  -3   36.52    3.21
   7  -1  -4   18.17    2.43
  -7  -1   4   19.07    2.51
  -7   1   5   40.36    3.35
   7  -1  -5   33.94    3.34
  -7  -1   5   38.93    3.33
  -7   1   6   10.08    2.02
   7  -1  -6    6.12    2.31
  -7   1   7    2.24    1.96
   7  -1  -7    3.10    2.48
   7   1  -7    2.62    2.49
  -7   1   8    6.06    2.18
   7  -1  -8    7.26    2.55
   7   1  -8    9.80    2.71
  -7  -1   8    3.70    2.30
  -7   1   9   16.33    2.46
   7  -1  -9   10.68    2.96
   7   1  -9   16.72    2.96
  -7  -1   9   12.12    2.50
  -7   1  10   52.60    4.65
   7  -1 -10   67.91    5.20
   7   1 -10   61.00    4.99
  -7  -1  10   69.54    4.73
   7   1 -11   32.89    3.66
  -7  -1  11   34.79    3.25
   7  -1 -12    0.43    2.99
   7   1 -12    0.12    2.82
  -7  -1  12    1.76    2.20
  -7   1  13   11.16    2.35
   7  -1 -13    6.18    3.10
   7   1 -13   11.59    2.93
  -7  -1  13    8.25    2.33
  -7   1  14   14.82    2.51
   7  -1 -14   12.08    3.02
   7   1 -14   16.07    3.07
  -7  -1  14   15.12    2.49
  -7   1  15    0.26    2.21
   7  -1 -15    1.17    2.79
   7   1 -15    0.28    2.76
  -7  -1  15    0.91    2.19
  -7   1  16    2.18    2.25
   7  -1 -16    2.83    2.92
   7   1 -16    2.59    2.82
  -7  -1  16    1.70    2.19
   7  -2  -1   17.01    2.42
   7   2  -1   13.69    2.23
   7  -2  -2   12.70    2.26
   7  -2  -3   16.45    2.40
   7  -2  -4  240.09   15.76
  -7  -2   4  248.21   15.88
  -7  -2   5   -3.24    2.11
  -7   2   6  137.30    9.26
   7  -2  -6  134.18    9.24
  -7  -2   6  141.66    9.18
  -7   2   7    4.83    2.27
   7   2  -7    8.01    2.62
  -7  -2   7    5.71    2.17
  -7   2   8    1.77    2.20
   7  -2  -8   -5.23    2.58
   7   2  -8    3.09    2.76
  -7  -2   8    3.17    2.29
   7  -2  -9   35.76    3.86
   7   2  -9   43.00    3.90
  -7   2  10    1.49    2.05
   7  -2 -10    1.90    2.96
   7   2 -10    1.12    2.65
  -7   2  11    5.68    2.18
   7  -2 -11    2.89    2.89
   7   2 -11    3.00    2.57
  -7  -2  11    5.47    2.26
  -7   2  12   26.90    2.82
   7  -2 -12   26.11    3.48
   7   2 -12   23.29    3.27
  -7  -2  12   21.98    2.90
  -7   2  13    6.74    2.22
   7  -2 -13    1.74    2.92
   7   2 -13    3.50    2.72
  -7  -2  13    5.85    2.33
  -7   2  14  106.46    7.19
  -7  -2  14  102.88    7.23
  -7   2  15    1.09    2.25
   7   2 -15   -3.36    2.77
  -7  -2  15   -1.20    2.26
  -7   2  16   16.52    2.66
   7  -2 -16   20.99    3.22
   7   2 -16   13.27    3.00
  -7  -2  16   15.39    2.65
   7  -3  -1   24.43    2.94
   7   3  -1   19.65    2.61
  -7  -3   1   27.25    2.85
   7  -3  -2   12.35    2.33
   7  -3  -2   10.06    2.48
  -7  -3   2   15.05    2.47
   7  -3  -3    1.07    2.11
  -7  -3   3    3.23    2.06
   7  -3  -4   39.41    3.45
   7  -3  -5   69.48    5.23
  -7  -3   5   73.06    5.16
   7  -3  -6   10.48    2.42
  -7  -3   6    9.04    2.31
  -7   3   7    5.47    2.08
  -7   3   8   45.37    3.85
   7  -3  -8   45.80    4.12
   7   3  -8   47.97    4.01
  -7  -3   8   47.98    3.93
  -7   3   9    3.96    2.22
   7  -3  -9    5.53    2.75
   7   3  -9    5.84    2.59
  -7  -3   9    4.09    2.26
  -7   3  10    9.74    2.28
   7  -3 -10    6.48    2.86
   7   3 -10    6.96    2.73
  -7  -3  10   10.48    2.38
  -7   3  11   -4.34    2.12
   7  -3 -11    1.37    2.88
  -7  -3  11    3.78    2.33
  -7   3  12   18.97    2.59
   7  -3 -12   21.34    3.44
   7   3 -12   16.76    3.00
  -7  -3  12   16.81    2.69
  -7   3  13    6.17    2.20
   7  -3 -13   10.17    3.16
   7   3 -13    6.87    2.78
  -7   3  14    1.37    2.16
   7  -3 -14   -6.04    2.84
   7   3 -14    1.16    2.55
  -7  -3  14    1.58    2.30
  -7   3  15   14.80    2.48
   7  -3 -15   12.49    3.05
   7   3 -15   13.43    2.83
  -7  -3  15   16.24    2.57
   7  -3 -16   41.38    3.89
   7   3 -16   33.52    3.87
  -7  -3  16   34.88    3.39
   7  -4  -1    2.15    2.54
  -7  -4   1    2.13    2.20
   7  -4  -2    5.78    2.40
  -7  -4   2    6.88    2.27
  -7  -4   3   32.13    3.12
  -7  -4   4  237.47   15.55
  -7  -4   4  226.72   14.90
   7  -4  -5    2.83    2.11
  -7  -4   5    1.03    2.09
   7  -4  -6   38.20    3.93
  -7  -4   6   54.80    3.88
  -7   4   7    6.96    2.10
   7  -4  -7    6.56    2.50
  -7   4   8    4.25    2.03
   7  -4  -8    0.32    2.42
  -7  -4   8    0.24    2.22
  -7   4   9    4.23    2.29
   7  -4  -9    6.47    2.84
  -7  -4   9    9.22    2.30
  -7   4  10    3.84    2.28
   7   4 -10    3.79    2.59
  -7  -4  10    6.68    2.38
  -7   4  11    0.02    2.20
   7   4 -11   -0.75    2.59
  -7  -4  11   -2.95    2.34
  -7   4  12   48.72    4.13
   7  -4 -12   51.27    4.62
   7   4 -12   56.31    4.53
  -7  -4  12   55.62    4.26
  -7   4  13    3.79    2.19
   7  -4 -13    6.87    2.94
   7   4 -13    5.99    2.71
  -7  -4  13    3.68    2.36
   7  -4 -14   37.71    3.72
   7   4 -14   29.51    3.60
  -7  -4  14   33.44    3.26
  -7   4  15    0.00    2.11
   7  -4 -15   -0.42    2.89
   7   4 -15    1.85    2.56
  -7  -4  15    0.58    2.26
   7  -4 -16   16.70    3.08
  -7  -4  16    9.36    2.47
   7  -5  -1   16.59    2.73
  -7  -5   1   19.17    2.66
   7  -5  -2    0.38    2.30
  -7  -5   2    0.70    2.28
   7  -5  -3   33.35    3.31
  -7  -5   3   28.35    3.07
  -7  -5   5    0.68    1.99
  -7  -5   6    1.76    2.13
   7  -5  -7    3.01    2.46
  -7  -5   7    2.91    2.30
  -7   5   8   18.14    2.41
  -7  -5   8   19.71    2.59
  -7   5   9   10.73    2.35
   7  -5  -9   12.82    2.90
   7   5  -9   12.17    2.50
  -7  -5   9   14.85    2.43
  -7   5  10    9.90    2.19
   7  -5 -10    8.78    2.87
   7   5 -10    8.20    2.68
   7  -5 -11   21.14    3.16
   7   5 -11   20.23    3.00
  -7  -5  11   18.85    2.74
   7  -5 -12   29.21    3.45
   7   5 -12   27.95    3.25
  -7  -5  12   23.62    2.97
  -7   5  13    1.60    2.43
   7  -5 -13    0.31    2.82
   7   5 -13  -10.01    2.65
  -7  -5  13    0.00    2.32
  -7   5  14    2.39    2.12
   7  -5 -14    1.88    2.77
   7   5 -14    2.06    2.77
  -7  -5  14   -0.25    2.29
  -7   5  15   12.75    2.31
   7   5 -15    3.51    2.91
  -7  -5  15    8.21    2.45
  -7  -5  16   56.51    4.46
   7  -6  -3   24.31    2.99
  -7  -6   3   24.32    2.82
   7  -6  -4  102.72    7.03
  -7  -6   4   92.98    6.79
  -7  -6   5   22.90    2.70
  -7  -6   7   -4.81    2.17
  -7  -6   8    8.33    2.31
  -7  -6   9    4.49    2.38
  -7   6  10    9.00    2.26
   7   6 -10   12.62    2.53
  -7  -6  10   12.40    2.50
  -7   6  11    0.75    2.07
   7  -6 -11    0.85    2.90
   7   6 -11    1.50    2.60
  -7  -6  11    0.47    2.29
  -7   6  12    3.58    2.09
   7  -6 -12    4.82    2.96
   7   6 -12    4.74    2.71
  -7  -6  12    4.38    2.31
  -7   6  13    1.65    2.29
   7  -6 -13    0.83    2.93
   7   6 -13    1.76    2.63
  -7  -6  13   -0.27    2.34
  -7   6  14   44.68    3.85
   7  -6 -14   45.17    4.31
   7  -6 -15    1.25    2.83
   7  -7  -1    8.23    2.59
  -7  -7   1    9.20    2.38
   7  -7  -2  236.60   15.77
  -7  -7   2  248.35   15.76
   7  -7  -3    9.19    2.60
  -7  -7   3   14.44    2.41
   7  -7  -4   89.72    6.22
  -7  -7   4   81.19    6.12
   7  -7  -5   -1.61    2.33
  -7  -7   5    0.97    2.15
   7   7 -10   33.34    3.42
  -7  -7  11    3.89    2.36
  -7   7  12   23.73    2.66
  -7  -7  12   17.64    2.79
  -7   7  13    0.10    2.14
   7   7 -13   -1.41    2.56
  -7  -7  13    2.66    2.34
  -7  -7  14    5.11    2.39
  -7  -7  15    0.00    2.31
   7  -8  -1    0.58    2.51
  -7  -8   1    1.66    2.22
   7  -8  -2    6.18    2.52
  -7  -8   2    5.83    2.33
   7  -8  -3    3.61    2.42
  -7  -8   3    1.13    2.25
   7  -8  -4  107.23    7.86
  -7  -8   4  121.85    7.91
   7  -8  -5    4.09    2.42
  -7  -8   5    1.90    2.18
   7  -8  -6   51.19    4.29
   7   8 -10    3.90    2.30
   7   8 -11    9.76    2.56
   7   8 -12   15.03    2.83
   7  -9  -1    4.05    2.61
  -7  -9   1    3.41    2.28
   7  -9  -2   90.51    6.46
  -7  -9   2   88.38    6.35
   7  -9  -3    5.61    2.66
  -7  -9   3    4.14    2.32
   7  -9  -5    9.85    2.64
   7  -9  -6   12.09    2.52
  -7  -9   6    9.64    2.45
   7  -9  -7   15.46    2.72
   7  -9  -8   25.64    3.06
   7   9 -10    7.22    2.47
   7 -10  -1    9.16    2.72
  -7 -10   1   11.80    2.40
   7 -10  -3    1.38    2.54
  -7 -10   3    2.89    2.16
   7 -10  -4   26.81    3.32
  -7 -10   4   28.90    3.07
   7 -10  -5    5.89    2.53
  -7 -10   5    5.32    2.24
   7 -10  -6   40.85    3.89
  -7 -10   6   46.67    3.89
   7 -10  -7    9.46    2.52
   7 -10  -8    7.61    2.55
   7 -11  -2   -5.60    2.64
  -6   0   3   -3.22    1.93
  -6   0   4  124.11    8.25
  -6   0   5    2.57    1.96
   6   0  -5   -1.07    2.02
  -6   0   6   76.86    5.61
   6   0  -6   85.73    5.81
  -6   0   7    0.27    2.04
   6   0  -7   -0.75    2.25
  -6   0   8  212.89   14.24
   6   0  -8  232.19   14.43
   6   0 -10   21.20    3.06
  -6   0  11    0.12    1.97
   6   0 -11    1.37    2.49
  -6   0  12   73.17    5.58
   6   0 -12   88.72    5.95
  -6   0  13    0.42    2.05
   6   0 -13   -5.21    2.65
  -6   0  14    6.32    2.12
  -6   0  15   -3.11    2.12
  -6   0  16   65.21    4.90
   6   0 -16   68.18    5.30
  -6   0  17    1.77    2.17
   6   0 -17   -6.91    2.94
  -6   0  18    3.09    2.20
   6   0 -18    5.61    3.01
  -6  -1   1   25.55    2.73
  -6  -1   2   27.05    2.74
  -6   1   3   20.54    2.45
   6  -1  -3   24.83    2.38
  -6  -1   3   21.18    2.46
  -6   1   4  282.46   19.08
   6  -1  -4  306.34   19.13
  -6  -1   4  302.24   19.00
  -6   1   5    2.54    2.05
   6  -1  -5    2.78    2.02
  -6  -1   5    6.00    2.03
  -6   1   6  307.57   20.27
   6   1  -6  323.55   20.68
  -6  -1   6  324.46   20.26
   6  -1  -7   16.66    2.56
   6   1  -7   10.68    2.56
  -6  -1   7   14.51    2.23
   6  -1  -8   44.63    3.93
   6   1  -8   49.15    4.07
  -6  -1   8   42.60    3.63
  -6   1   9   14.61    2.19
   6  -1  -9    9.14    2.76
   6   1  -9   12.06    2.72
  -6  -1   9    8.77    1.24
  -6   1  10   32.86    3.04
   6  -1 -10   34.29    3.52
   6   1 -10   29.36    3.39
  -6  -1  10   31.83    3.03
  -6   1  11   45.70    3.79
   6  -1 -11   50.71    4.28
  -6  -1  11   43.89    3.76
  -6   1  12  158.13   10.81
   6  -1 -12  178.34   11.14
  -6   1  13    4.32    2.12
   6  -1 -13    0.23    2.70
   6   1 -13    3.26    2.47
  -6   1  14   88.51    6.01
   6  -1 -14   82.06    6.36
   6   1 -14   79.60    6.30
  -6  -1  14   89.10    6.03
  -6   1  15    3.30    2.08
   6  -1 -15   -5.23    2.79
   6   1 -15    2.79    2.75
  -6  -1  15    0.32    2.12
  -6   1  16   31.03    3.04
   6  -1 -16   30.15    3.68
   6   1 -16   31.05    3.60
  -6  -1  16   32.11    3.10
  -6   1  17    1.48    2.10
   6   1 -17    3.66    2.79
  -6  -1  17    0.49    2.20
   6   1 -18    5.95    2.99
  -6  -1  18    7.35    2.21
   6  -2  -1  298.13   19.05
  -6  -2   1  289.68   18.85
   6  -2  -2  342.47   21.57
  -6  -2   2  332.10   21.64
  -6  -2   2  333.21   21.87
   6  -2  -3   25.09    2.45
  -6  -2   3   19.84    2.51
  -6  -2   3   21.85    2.47
   6  -2  -4  194.06   12.53
  -6  -2   4  192.01   12.47
   6  -2  -5   30.45    2.88
  -6   2   6   -6.59    2.07
   6  -2  -6    0.95    2.28
  -6  -2   6    1.90    2.00
  -6   2   7   -2.06    2.07
   6  -2  -7    0.99    2.30
   6   2  -7    1.20    2.27
  -6  -2   7    0.08    2.00
  -6   2   8    4.24    2.09
   6  -2  -8    6.78    2.53
   6   2  -8    7.11    2.36
  -6  -2   8    8.37    2.17
  -6   2   9  132.19    7.44
  -6  -2   9  102.08    7.02
  -6   2  10    6.56    2.11
   6  -2 -10   11.18    2.95
   6   2 -10    8.60    2.49
  -6  -2  10    9.93    2.19
  -6   2  11   31.41    3.12
   6  -2 -11   35.69    3.70
   6   2 -11   33.85    3.49
  -6  -2  11   34.83    3.21
  -6   2  12  154.96    9.80
   6  -2 -12  148.90   10.04
   6   2 -12  136.22    9.94
  -6  -2  12  149.55    9.75
  -6   2  13    2.40    2.17
   6  -2 -13    3.80    2.83
   6   2 -13    4.27    2.47
  -6  -2  13    5.81    2.17
  -6   2  14   24.54    2.82
   6  -2 -14   32.65    3.53
   6   2 -14   27.53    3.30
  -6  -2  14   21.69    2.78
   6  -2 -15    7.90    2.94
   6   2 -15    4.10    2.70
  -6   2  16   25.26    2.81
   6  -2 -16   26.43    3.37
   6   2 -16   23.53    3.36
  -6   2  17   -6.06    2.25
   6  -2 -17    0.00    2.78
   6   2 -17    1.25    2.67
  -6  -2  17   -3.43    2.17
  -6   2  18    7.13    2.27
   6  -2 -18    9.40    3.03
   6   2 -18    7.83    2.93
  -6  -2  18    6.15    2.25
   6  -3  -1    9.91    1.95
   6  -3  -1    8.15    2.29
  -6  -3   1    9.28    2.17
   6  -3  -2   29.22    2.79
  -6  -3   2   27.74    2.93
  -6  -3   2   33.17    2.72
  -6  -3   3   36.69    3.47
  -6  -3   3   41.26    3.24
   6  -3  -4   38.71    3.32
  -6  -3   4   40.02    3.29
  -6   3   5   17.40    2.42
   6  -3  -5   22.66    2.58
  -6  -3   5   26.09    2.57
   6  -3  -6   41.96    3.61
  -6  -3   6   41.64    3.46
  -6   3   7    4.05    2.09
   6  -3  -7    2.81    2.29
  -6   3   8   13.15    2.12
   6  -3  -8    8.68    2.51
   6   3  -8   11.17    2.18
  -6  -3   8    6.83    1.12
  -6   3   9    0.68    2.01
   6  -3  -9   -5.29    2.63
   6   3  -9    1.61    2.21
  -6  -3   9    1.73    1.16
  -6  -3   9   -0.21    2.10
  -6   3  10   68.37    4.94
   6  -3 -10   68.64    5.34
   6   3 -10   59.73    5.15
  -6  -3  10   74.48    5.01
  -6   3  11   47.86    4.11
   6   3 -11   50.77    4.39
  -6  -3  11   58.58    4.15
  -6   3  12   27.03    2.93
   6   3 -12   26.21    3.30
  -6  -3  12   33.05    2.97
   6  -3 -13    3.27    2.99
   6   3 -13   -3.86    2.63
  -6  -3  13    2.26    2.16
  -6   3  14   47.10    3.99
   6  -3 -14   45.45    4.25
   6   3 -14   43.70    4.18
  -6  -3  14   51.46    3.94
  -6   3  15   11.04    2.45
   6  -3 -15   14.11    2.97
   6   3 -15   15.47    2.84
  -6  -3  15   15.48    2.46
  -6   3  16   29.10    3.03
   6  -3 -16   28.01    3.50
   6   3 -16   30.28    3.49
  -6  -3  16   26.76    2.97
  -6   3  17   15.42    2.54
   6  -3 -17   18.10    3.09
  -6  -3  17   13.47    2.48
  -6   3  18    1.05    2.25
   6  -3 -18    4.89    2.71
   6   3 -18    2.23    2.88
  -6  -3  18    0.63    2.22
   6  -4  -1    1.76    1.81
   6  -4  -1    2.54    2.31
  -6  -4   1    0.78    1.96
   6  -4  -2   92.39    6.45
  -6  -4   2   97.87    6.45
   6  -4  -3    4.57    1.83
  -6  -4   3    4.27    2.12
  -6  -4   3    3.44    1.83
   6  -4  -4  123.36    7.95
  -6  -4   4  114.54    8.11
  -6  -4   4  118.82    7.89
  -6   4   5   10.38    1.98
   6  -4  -5    8.34    1.01
   6  -4  -5    7.96    1.07
  -6  -4   5   16.93    2.15
  -6   4   6    1.30    1.90
   6  -4  -6    1.39    2.18
  -6  -4   6    2.41    2.04
  -6   4   7   71.06    5.27
   6  -4  -7   66.66    5.36
  -6  -4   7   80.20    5.25
  -6   4   8    7.88    2.17
   6  -4  -8    6.97    2.52
  -6  -4   8    4.49    1.18
  -6  -4   8   10.42    2.22
  -6   4   9    1.30    1.96
   6  -4  -9    4.34    2.72
   6   4  -9    1.95    2.15
  -6  -4   9    2.20    2.15
   6  -4 -10   15.61    3.11
   6   4 -10   18.37    2.76
  -6   4  11    7.29    2.14
   6  -4 -11    7.63    2.92
   6   4 -11    2.56    2.58
  -6   4  12   25.57    2.89
   6  -4 -12   25.13    3.41
   6   4 -12   30.96    3.22
  -6  -4  12   32.03    2.97
  -6   4  13    3.17    2.11
   6  -4 -13    4.22    2.83
   6   4 -13    1.42    2.68
  -6  -4  13    3.45    2.21
  -6   4  14    2.76    2.15
   6  -4 -14    0.30    2.87
   6   4 -14   -1.90    2.72
  -6  -4  14    1.66    2.21
  -6   4  15    1.82    2.11
  -6  -4  15    1.01    2.18
  -6   4  16   57.98    4.55
   6   4 -16   57.09    4.84
  -6  -4  16   61.73    4.53
  -6   4  17    0.10    2.31
   6  -4 -17   -2.91    2.85
   6   4 -17    0.45    2.79
  -6  -4  17   -1.61    2.18
   6  -4 -18   26.22    3.51
   6  -5  -1   48.47    3.10
   6  -5  -1   40.26    3.09
   6  -5  -1   50.18    3.79
   6  -5  -2    4.82    1.14
   6  -5  -2    6.73    1.20
   6  -5  -2    6.96    2.23
  -6  -5   2    4.91    2.05
  -6  -5   2    7.46    1.62
   6  -5  -3   28.21    2.31
   6  -5  -3   35.20    2.34
   6  -5  -3   26.77    2.81
  -6  -5   3   32.36    3.06
  -6  -5   3   35.03    2.75
   6  -5  -4   98.48    6.56
   6  -5  -4   90.21    6.56
   6  -5  -4  104.90    6.89
  -6  -5   4  116.91    7.06
  -6  -5   4  120.92    6.84
   6  -5  -5   12.43    2.22
  -6  -5   5    6.75    1.01
  -6  -5   5   12.10    2.12
   6  -5  -6  137.85   10.07
  -6  -5   6  166.23   10.03
  -6   5   7   -5.95    2.03
   6  -5  -7    1.87    2.33
  -6  -5   7    1.84    2.11
  -6  -5   8    5.57    2.16
  -6   5   9    5.92    2.16
   6  -5  -9    4.69    2.79
   6   5  -9    4.29    2.07
  -6  -5   9    5.36    2.22
  -6   5  10    2.31    2.22
   6  -5 -10    0.27    2.67
   6   5 -10    1.92    2.18
  -6  -5  10    0.61    2.13
  -6   5  11    2.65    2.08
   6  -5 -11    2.31    2.77
   6   5 -11    3.47    2.59
  -6  -5  11    3.44    2.23
  -6   5  12   24.82    2.88
   6  -5 -12   32.79    3.42
  -6  -5  12   27.75    2.97
  -6   5  13   16.37    2.47
   6  -5 -13   15.59    2.97
  -6  -5  13   11.67    2.47
  -6   5  14   81.40    5.78
   6  -5 -14   79.94    6.05
   6   5 -14   81.08    6.06
  -6   5  15   12.36    2.34
   6  -5 -15    5.75    2.96
   6   5 -15   10.30    2.85
  -6   5  16    6.05    2.31
   6  -5 -16    8.41    3.07
   6   5 -16    9.27    2.83
  -6  -5  16    7.07    2.39
   6  -5 -17    2.52    2.84
   6   5 -17    1.95    2.70
  -6  -5  17    0.66    2.27
   6  -6  -1    2.35    2.23
  -6  -6   1    0.34    1.02
  -6  -6   1    0.39    1.06
  -6  -6   1    0.05    2.01
   6  -6  -2  176.42    9.61
  -6  -6   2  124.74    8.87
  -6  -6   2  168.23    9.36
   6  -6  -3    1.41    2.17
  -6  -6   3    1.19    0.97
  -6  -6   3    1.07    2.15
  -6  -6   3    2.10    1.62
  -6  -6   4   44.75    3.61
  -6  -6   4   66.35    4.30
  -6  -6   4   73.12    4.04
   6  -6  -5    1.87    2.02
  -6  -6   5    1.47    2.10
  -6  -6   5    0.76    1.84
   6  -6  -6   35.80    3.31
  -6  -6   6   33.94    3.26
  -6  -6   6   34.59    3.09
   6  -6  -7   26.56    3.09
  -6  -6   7   24.94    2.70
  -6   6   8  118.34    7.97
   6  -6  -8  113.70    8.02
  -6   6   9   36.00    3.23
   6  -6  -9   33.85    3.72
  -6   6  10   53.26    4.12
   6  -6 -10   49.89    4.46
  -6  -6  10   49.90    4.04
  -6   6  11    1.22    2.17
   6   6 -11    2.10    2.47
  -6  -6  11    0.23    2.22
  -6   6  12    1.01    2.27
   6  -6 -12    3.53    2.90
   6   6 -12    2.08    2.54
  -6  -6  12    4.99    2.32
  -6   6  13    3.03    2.16
   6  -6 -13    2.01    2.90
   6   6 -13    4.82    2.55
  -6  -6  13    4.51    2.30
  -6   6  14   -4.51    2.22
   6  -6 -14   -7.56    2.91
   6   6 -14    1.27    2.76
  -6  -6  14    0.10    2.27
   6  -6 -15    1.29    2.81
   6   6 -15    0.77    2.68
  -6  -6  15    0.78    2.30
  -6   6  16   29.33    3.10
   6  -6 -16   32.95    3.68
   6   6 -16   27.83    3.40
  -6  -6  16   30.96    3.14
   6  -6 -17    0.89    2.85
  -6  -6  17    3.53    2.30
   6  -7  -1   31.87    3.29
  -6  -7   1   32.94    3.08
   6  -7  -2   15.22    2.54
  -6  -7   2   19.51    2.52
   6  -7  -3    1.98    2.22
  -6  -7   3    1.59    2.19
   6  -7  -4  106.96    7.41
  -6  -7   4  101.07    7.13
  -6  -7   6  187.79   12.77
  -6  -7   6  191.73   12.28
  -6  -7   7    1.78    2.02
   6  -7  -8   16.09    3.15
  -6  -7   8   27.98    2.69
  -6   7   9    0.86    1.94
  -6  -7   9    1.82    2.15
  -6   7  10    4.88    2.07
   6  -7 -10    4.38    2.75
   6   7 -10    2.00    2.30
  -6  -7  10    3.19    2.24
  -6   7  11    0.43    2.11
   6  -7 -11    1.58    2.76
   6   7 -11    0.70    2.40
  -6   7  12   39.22    3.63
   6  -7 -12   42.63    4.01
   6   7 -12   43.30    3.96
  -6  -7  12   40.44    3.63
   6  -7 -13   32.38    3.64
   6   7 -13   28.65    3.38
  -6  -7  13   30.70    3.16
  -6   7  14  134.19    9.10
   6  -7 -14  128.76    9.26
   6   7 -14  137.00    9.26
  -6  -7  14  140.11    9.06
  -6   7  15    6.21    2.32
   6  -7 -15    6.25    2.86
   6   7 -15    6.86    2.80
  -6  -7  15    2.49    2.33
  -6  -7  16   17.71    2.70
   6  -8  -1    0.64    2.40
  -6  -8   1    0.64    2.10
   6  -8  -2  197.13   12.93
  -6  -8   2  196.86   12.84
   6  -8  -4   26.68    3.18
  -6  -8   4   25.70    2.90
   6  -8  -5    3.10    2.30
  -6  -8   5    0.07    2.09
  -6  -8   6   57.46    4.53
  -6  -8   9   14.45    2.37
  -6  -8  10   19.15    2.60
   6   8 -11    3.54    2.47
  -6  -8  11    2.76    2.27
  -6   8  12   33.12    3.13
   6  -8 -12   29.63    3.58
   6   8 -12   33.42    3.47
  -6  -8  12   28.67    3.18
  -6   8  13   -2.22    2.12
   6  -8 -13    3.55    2.75
   6   8 -13    0.63    2.63
  -6  -8  13    0.93    2.31
  -6   8  14    3.49    2.28
   6  -8 -14    5.72    2.79
  -6  -8  14    2.45    2.36
  -6   8  15   -1.47    2.28
   6  -8 -15   -3.10    2.89
  -6  -8  15   -0.68    2.33
   6  -8 -16   -0.69    2.75
  -6  -8  16    0.41    2.30
   6  -9  -2    9.46    2.54
  -6  -9   2    9.36    2.31
   6  -9  -3    3.10    2.43
  -6  -9   3    0.69    2.21
   6  -9  -4   10.41    2.52
  -6  -9   4   12.13    2.34
   6  -9  -5   18.47    2.78
  -6  -9   5   21.70    2.68
   6  -9  -6   91.65    6.70
  -6  -9   6   93.98    6.61
   6   9 -11    4.65    2.45
   6   9 -13    5.14    2.74
  -6  -9  13    1.26    2.37
  -6  -9  14   49.21    4.07
  -6  -9  15   62.65    4.81
   6 -10  -1    3.56    2.57
  -6 -10   1    4.44    2.19
   6 -10  -2   39.13    3.85
  -6 -10   2   41.87    3.59
   6 -10  -3    6.67    2.60
  -6 -10   3    4.58    2.32
   6 -10  -4   12.00    2.67
  -6 -10   4   11.28    2.43
   6 -10  -5   28.56    3.20
  -6 -10   5   29.50    3.03
   6 -10  -6   21.22    2.86
  -6 -10   6   20.42    2.66
   6 -10  -8   26.75    3.11
   6  10 -11   17.83    2.78
   6  10 -12    0.31    2.57
   6 -11  -1   37.50    3.67
  -6 -11   1   38.08    3.38
   6 -11  -2    1.75    2.52
  -6 -11   2    1.65    2.24
   6 -11  -3    9.54    2.73
  -6 -11   3    7.10    2.43
   6 -11  -4   73.29    5.53
  -6 -11   4   71.21    5.33
   6 -11  -6    7.70    2.55
  -6 -11   6   10.17    2.37
   6 -11  -7   16.44    2.75
   6 -11  -8    6.71    2.48
   6 -11  -9   22.95    3.00
   6 -11 -10    3.52    2.46
   6 -12  -1   -2.55    2.61
  -6 -12   1    1.45    2.15
  -6 -12   2    5.34    2.43
   6 -12  -3    2.11    2.61
   6 -12  -4   63.75    5.02
  -6 -12   4   62.66    4.87
   6 -12  -5    0.00    2.53
  -6 -12   5    2.21    2.24
   6 -12  -6   39.06    3.85
  -6 -12   6   39.02    3.52
   6 -12  -7   43.74    3.98
   6 -12  -8   36.26    3.67
  -5   0   1    0.03    1.67
  -5   0   2  124.90    8.48
  -5   0   2  123.61    8.19
  -5   0   3   -0.28    1.73
  -5   0   4  131.87    8.63
   5   0  -5   -1.91    1.92
  -5   0   6   72.64    4.83
   5   0  -6  106.19    5.57
  -5   0   7   -1.75    1.78
   5   0  -7   -0.89    0.76
   5   0  -7   -2.09    0.83
   5   0  -7    0.45    2.31
  -5   0   8   10.89    2.00
   5   0  -8   10.89    2.52
  -5   0   9    0.80    1.85
   5   0  -9    5.55    2.61
  -5   0  10   41.72    3.41
  -5   0  12   33.14    2.99
   5   0 -12   30.42    3.45
  -5   0  13   -0.15    2.10
   5   0 -13    2.07    2.65
  -5   0  14   84.57    5.67
   5   0 -14   73.59    5.89
  -5   0  15   -2.58    2.12
   5   0 -15    1.34    2.65
   5   0 -16   33.47    3.69
   5   0 -17    4.24    2.90
  -5   0  18    1.58    2.24
   5   0 -18    5.41    2.82
  -5   0  19    1.39    2.17
   5   0 -19   -5.60    2.86
  -5  -1   1    0.20    1.72
  -5  -1   1   -1.95    1.62
  -5   1   2   67.92    4.96
  -5  -1   2   69.68    5.00
  -5  -1   2   74.36    4.89
  -5  -1   3    1.03    1.79
  -5  -1   3    3.25    1.71
  -5   1   4  105.65    7.48
   5  -1  -4  119.34    7.58
  -5  -1   4  115.36    7.47
  -5   1   5    2.23    1.80
   5  -1  -5    2.27    1.90
  -5  -1   5    0.57    1.82
  -5   1   6  259.32   15.94
  -5   1   6  317.11   16.32
   5  -1  -6  277.17   15.97
   5  -1  -6  272.14   15.97
   5  -1  -6  341.42   16.54
   5   1  -6  309.36   16.86
  -5  -1   6  206.59   15.90
  -5  -1   6  233.37   15.95
  -5  -1   6  303.59   16.27
  -5   1   7   43.78    3.14
  -5   1   7   49.16    3.68
   5  -1  -7   47.63    3.14
   5  -1  -7   46.51    3.14
   5  -1  -7   55.50    3.92
  -5  -1   7   52.63    3.32
  -5  -1   7   48.67    3.63
  -5   1   8  450.69   28.73
   5  -1  -8  485.91   28.90
   5   1  -8  427.61   28.92
  -5   1   9    0.30    1.80
   5  -1  -9    1.17    2.64
   5   1  -9    0.80    2.32
  -5  -1   9   -6.35    1.87
  -5   1  10  111.94    7.66
   5  -1 -10  123.96    8.01
   5   1 -10  112.96    7.93
  -5  -1  10  115.14    7.69
  -5   1  11    4.94    1.89
   5  -1 -11    3.97    2.67
  -5   1  12   45.75    3.62
   5   1 -12   43.03    3.95
  -5  -1  12   45.24    3.61
  -5   1  13   14.98    2.38
   5   1 -13   14.69    2.75
  -5  -1  13   14.28    2.30
   5  -1 -14    4.35    2.70
   5   1 -14    3.82    2.60
  -5  -1  14    7.39    2.17
  -5   1  15   -1.59    2.12
   5  -1 -15    1.23    2.75
   5   1 -15   -1.20    2.65
  -5  -1  15    0.12    2.12
  -5   1  16   43.03    3.62
   5  -1 -16   42.20    4.13
   5   1 -16   38.88    4.05
  -5  -1  16   46.72    3.67
  -5   1  17    3.14    2.17
   5  -1 -17    0.98    2.78
   5   1 -17    3.31    2.92
  -5  -1  17    4.69    2.21
  -5   1  18   73.50    5.74
   5  -1 -18   86.53    6.17
  -5  -1  18   87.11    5.84
  -5   1  19    8.45    2.37
   5  -1 -19   12.76    3.04
   5   1 -19   15.07    3.11
  -5  -2   1    0.73    1.77
   5  -2  -2    3.93    1.60
  -5  -2   2    2.42    1.65
  -5   2   3   -2.61    1.68
   5  -2  -3    1.04    1.58
  -5  -2   3    0.49    1.78
  -5  -2   3    1.00    1.68
  -5   2   4  164.86   10.85
  -5  -2   4  158.68   11.17
  -5  -2   4  173.97   10.79
  -5   2   5   68.12    4.33
  -5   2   5   89.07    4.86
   5  -2  -5   63.81    4.29
   5  -2  -5   61.04    4.29
   5  -2  -5   94.20    4.93
  -5  -2   5   88.81    4.82
  -5   2   6  174.43    9.95
   5  -2  -6  164.49    9.59
   5  -2  -6  166.56    9.60
   5  -2  -6  198.19   10.10
  -5  -2   6  132.70    9.64
  -5  -2   6  134.93    9.55
  -5  -2   6  140.29    9.60
  -5  -2   6  180.55    9.90
  -5   2   7   13.47    2.19
   5  -2  -7   19.81    2.56
   5   2  -7   14.47    2.15
  -5  -2   7   10.93    1.19
  -5  -2   7   14.30    1.25
  -5  -2   7   22.81    1.54
  -5  -2   7   14.70    2.14
  -5   2   8    4.97    1.95
   5  -2  -8    5.82    2.59
   5   2  -8    3.97    2.12
  -5  -2   8    6.12    2.01
  -5   2   9   65.49    4.71
   5  -2  -9   69.19    5.06
   5   2  -9   65.30    4.92
  -5  -2   9   59.29    4.64
  -5   2  10   18.51    2.36
   5  -2 -10   18.37    3.00
   5   2 -10   22.90    2.95
  -5  -2  10   17.41    2.41
   5  -2 -11   10.94    2.84
   5   2 -11   11.99    2.61
   5  -2 -12   43.13    4.03
   5   2 -12   38.97    3.94
  -5  -2  12   46.75    3.57
  -5   2  13   17.05    2.46
   5  -2 -13   24.30    3.15
   5   2 -13   20.52    2.92
  -5  -2  13   21.52    2.50
  -5   2  14  182.33   12.43
   5  -2 -14  191.25   12.68
   5   2 -14  189.67   12.65
  -5  -2  14  203.63   12.46
  -5   2  15   52.00    4.24
   5   2 -15   54.74    4.70
  -5  -2  15   59.72    4.29
  -5   2  16   10.19    2.28
   5  -2 -16   10.34    3.01
  -5  -2  16   10.53    2.40
  -5   2  17   13.98    2.41
   5  -2 -17   13.66    3.04
   5   2 -17   13.79    2.94
  -5  -2  17   16.14    2.43
  -5   2  18   39.94    3.50
   5  -2 -18   41.06    4.02
   5   2 -18   37.53    3.97
  -5  -2  18   39.15    3.53
  -5   2  19    0.43    2.18
   5  -2 -19   -3.79    2.87
   5   2 -19  -11.39    3.00
  -5  -2  19    0.39    2.24
   5  -3  -1   11.91    1.06
   5  -3  -1   11.37    1.05
   5  -3  -1   16.92    1.86
  -5  -3   1   13.08    2.04
  -5  -3   1   17.07    1.67
   5  -3  -2  448.67   27.27
   5  -3  -2  355.35   27.35
   5  -3  -2  451.26   27.27
   5  -3  -2  400.83   27.23
   5  -3  -2  550.75   27.71
  -5  -3   2  529.96   27.76
  -5  -3   2  533.52   27.64
  -5   3   3    6.43    1.82
   5  -3  -3    8.68    0.83
   5  -3  -3    4.61    0.72
   5  -3  -3    7.43    0.85
   5  -3  -3    7.04    0.75
   5  -3  -3    8.79    1.82
  -5  -3   3    9.99    1.93
  -5   3   4  521.70   24.57
   5  -3  -4  445.47   23.74
   5  -3  -4  439.72   23.73
   5  -3  -4  532.74   24.20
  -5  -3   4  336.69   23.65
  -5  -3   4  345.42   23.65
  -5  -3   4  326.25   23.65
  -5  -3   4  539.87   24.93
  -5   3   5   14.92    1.23
  -5   3   5   17.43    2.13
   5  -3  -5   12.82    1.15
   5  -3  -5   13.74    1.20
   5  -3  -5   20.42    2.17
  -5  -3   5   10.90    1.08
  -5  -3   5   12.02    1.10
  -5  -3   5   15.24    1.23
  -5  -3   5   12.94    2.22
  -5  -3   5   20.34    2.08
  -5   3   6   85.15    5.55
   5  -3  -6   85.59    5.64
  -5  -3   6   71.81    5.17
  -5  -3   6   90.42    5.49
  -5   3   7   45.71    3.66
  -5  -3   7   46.36    3.61
  -5   3   8  265.46   15.34
   5  -3  -8  246.03   15.37
   5   3  -8  242.54   15.61
  -5  -3   8  212.97   15.08
  -5  -3   8  247.02   15.24
   5  -3  -9   60.55    4.50
   5   3  -9   49.37    4.24
  -5  -3   9   51.64    3.81
  -5  -3   9   55.27    4.06
   5  -3 -10  284.36   17.51
  -5  -3  10  254.88   17.39
  -5  -3  10  277.26   17.29
  -5   3  11    1.84    1.98
   5  -3 -11    0.14    2.74
   5   3 -11    4.42    2.40
  -5   3  12   12.77    2.24
   5  -3 -12   14.72    2.91
   5   3 -12    9.41    2.77
  -5  -3  12   17.99    2.37
  -5   3  13    1.08    1.99
   5  -3 -13    2.90    2.67
  -5   3  14    4.94    2.10
   5  -3 -14    5.67    2.89
  -5   3  15    1.57    2.04
   5  -3 -15    1.78    2.82
   5   3 -15    2.94    2.64
  -5  -3  15    1.98    1.98
  -5   3  16   20.48    2.48
   5  -3 -16   15.44    3.08
   5   3 -16   17.84    3.18
  -5  -3  16   18.84    2.51
  -5   3  17   15.06    2.42
   5  -3 -17   16.04    3.04
   5   3 -17   13.54    2.92
  -5  -3  17   14.49    2.47
   5   3 -18   58.89    4.82
  -5  -3  18   55.86    4.40
  -5   3  19   -0.15    2.18
   5   3 -19    0.49    2.82
  -5  -3  19   -2.43    2.22
   5  -4  -1    5.66    1.22
   5  -4  -1    5.40    1.25
   5  -4  -1    4.32    0.85
   5  -4  -1    2.78    1.59
   5  -4  -1    7.34    1.92
  -5  -4   1    5.60    0.81
  -5  -4   1    3.24    0.89
  -5  -4   1    4.81    0.86
  -5  -4   1    4.61    0.90
  -5  -4   1    3.32    1.88
  -5  -4   1    4.90    1.30
   5  -4  -2  106.11    6.04
   5  -4  -2  104.16    6.06
   5  -4  -2   86.24    5.92
  -5  -4   2   94.28    5.92
  -5  -4   2   93.90    5.93
  -5  -4   2   78.92    5.92
  -5  -4   2   96.14    6.33
  -5  -4   2  106.03    6.17
   5  -4  -3   34.93    2.52
  -5  -4   3   23.93    1.88
  -5  -4   3   27.12    1.91
  -5  -4   3   23.61    1.94
  -5  -4   3   33.53    2.72
  -5  -4   3   41.05    2.50
  -5   4   4   74.69    5.01
  -5   4   4   93.63    5.56
   5  -4  -4   83.31    5.34
  -5  -4   4   68.31    4.96
  -5  -4   4   79.39    5.45
  -5  -4   4   91.27    5.32
  -5   4   5   10.58    2.13
   5  -4  -5   10.39    2.08
  -5  -4   5   10.55    1.27
  -5  -4   5   10.46    2.13
  -5  -4   5    9.97    1.96
  -5   4   6  131.50    8.87
   5  -4  -6  137.22    8.90
   5  -4  -7  118.40    7.61
  -5  -4   7  101.19    7.22
  -5  -4   7  126.58    7.47
  -5   4   8   11.24    2.20
   5  -4  -8   10.17    2.58
  -5  -4   8   11.14    1.71
  -5  -4   8   17.07    2.19
  -5  -4   9   17.42    1.92
  -5  -4   9   20.83    2.44
  -5   4  10    4.46    2.06
   5   4 -10    5.13    2.26
  -5  -4  10    5.84    2.10
  -5   4  11    7.82    2.15
  -5   4  12   -3.38    2.10
   5  -4 -12   -5.67    2.58
   5   4 -12    1.14    2.48
  -5  -4  12    0.74    2.01
  -5   4  13   -5.99    2.18
   5  -4 -13    0.00    2.71
   5   4 -13   -3.51    2.69
  -5  -4  13    2.25    2.03
  -5   4  14   90.36    6.35
   5  -4 -14   93.76    6.59
   5   4 -14   87.17    6.62
  -5  -4  14   92.45    6.29
  -5   4  15   22.94    2.70
   5  -4 -15   22.12    3.20
   5   4 -15   13.88    2.94
  -5  -4  15   20.55    2.60
   5  -4 -16   12.81    3.15
   5   4 -16   15.19    3.15
  -5  -4  16   18.48    2.41
  -5   4  17    1.01    2.17
   5  -4 -17    4.66    2.81
   5   4 -17    2.15    2.71
  -5   4  18   17.95    2.65
   5  -4 -18   23.03    3.12
   5   4 -18   20.10    3.27
  -5  -4  18   20.74    2.59
  -5   4  19    4.33    2.22
   5  -4 -19    4.22    2.92
   5   4 -19    4.45    2.86
  -5  -4  19    4.23    2.15
   5  -5  -1   21.57    1.80
   5  -5  -1   19.68    1.84
   5  -5  -1   12.63    1.76
   5  -5  -1   16.33    2.40
  -5  -5   1   14.39    1.53
  -5  -5   1   16.73    2.34
  -5  -5   1   16.71    1.60
   5  -5  -2  160.05    9.83
   5  -5  -2  162.25    9.87
   5  -5  -2  153.81    9.83
  -5  -5   2  139.37    9.69
  -5  -5   2  158.27   10.00
   5  -5  -3   34.73    2.92
  -5  -5   3   33.68    3.16
  -5  -5   3   38.70    2.85
  -5  -5   4   85.63    6.14
  -5  -5   4   89.45    5.92
  -5   5   5   35.29    3.03
   5  -5  -5   36.87    3.03
  -5  -5   5   30.43    2.50
  -5  -5   5   32.98    3.16
  -5  -5   5   37.61    2.90
  -5   5   6    3.74    1.83
   5  -5  -6    3.75    2.08
  -5  -5   6    2.65    1.32
  -5  -5   6    4.92    1.89
  -5   5   7   28.19    3.01
   5  -5  -7   32.59    3.11
  -5  -5   7   29.25    2.48
  -5  -5   7   33.22    2.86
   5  -5  -8  208.32   12.63
  -5  -5   8  172.49   12.29
  -5  -5   8  212.78   12.46
  -5   5   9   62.46    4.65
   5  -5  -9   66.05    5.03
  -5   5  10   56.70    4.31
   5  -5 -10   62.01    4.78
   5   5 -10   54.73    4.48
  -5  -5  10   58.40    4.34
  -5   5  11    0.13    2.03
   5   5 -11    0.76    2.35
  -5  -5  11    1.17    2.02
  -5   5  12   20.93    2.48
   5   5 -12   18.67    2.89
  -5  -5  12   16.39    2.43
  -5   5  13    1.91    2.13
   5   5 -13    2.31    2.59
  -5  -5  13    0.21    2.04
   5  -5 -14   -6.06    2.83
   5   5 -14    2.63    2.66
  -5  -5  14    1.20    2.09
  -5   5  15    7.58    2.29
   5  -5 -15   11.07    2.94
   5   5 -15    7.81    2.66
  -5  -5  15    8.08    2.23
  -5   5  16   25.08    2.92
   5  -5 -16   25.44    3.41
   5   5 -16   24.32    3.26
  -5  -5  16   28.83    2.85
  -5   5  17   15.49    2.57
   5  -5 -17   12.56    2.98
   5   5 -17    9.55    2.95
  -5  -5  17   13.22    2.28
  -5   5  18   23.57    2.80
   5  -5 -18   24.39    3.24
  -5  -5  18   20.16    2.61
   5  -6  -1   57.18    4.49
  -5  -6   1   52.77    3.88
  -5  -6   1   68.84    4.35
   5  -6  -2   32.87    2.53
   5  -6  -2   33.38    2.61
   5  -6  -2   26.68    2.41
   5  -6  -2   29.32    2.99
  -5  -6   2   26.14    2.25
  -5  -6   2   25.52    2.78
  -5  -6   2   31.02    2.27
   5  -6  -3    5.07    1.72
  -5  -6   3    6.33    1.29
  -5  -6   3    6.89    2.10
  -5  -6   3    8.66    1.51
   5  -6  -4  208.46   12.96
  -5  -6   4  197.56   12.82
   5  -6  -5   25.50    2.49
  -5  -6   5   17.74    1.89
  -5  -6   5   20.60    2.60
  -5  -6   5   25.12    2.36
  -5  -6   6   85.99    5.97
  -5  -6   6   98.14    6.18
  -5   6   7   15.26    2.21
   5  -6  -7   13.50    2.70
  -5  -6   7   10.94    2.22
  -5   6   8    1.88    2.15
   5  -6  -8    0.51    2.51
  -5  -6   8    1.69    2.02
  -5   6   9   46.99    3.87
   5  -6  -9   49.86    4.16
  -5  -6   9   45.50    3.78
  -5   6  10   49.23    3.89
   5  -6 -10   46.11    4.33
   5   6 -10   53.56    4.16
  -5  -6  10   51.23    3.98
  -5   6  11   45.75    3.72
   5  -6 -11   48.10    4.17
   5   6 -11   42.36    3.95
  -5  -6  11   46.66    3.72
   5  -6 -12   58.37    4.79
   5   6 -12   56.34    4.69
  -5   6  13    5.47    2.17
   5  -6 -13    6.10    2.76
   5   6 -13    6.73    2.63
  -5  -6  13    5.61    2.27
  -5   6  14   30.56    3.07
   5  -6 -14   30.21    3.52
   5   6 -14   28.92    3.50
  -5  -6  14   32.45    3.08
  -5   6  15   28.98    2.92
   5  -6 -15   21.95    3.46
   5   6 -15   27.89    3.41
  -5  -6  15   27.97    3.01
  -5   6  16   32.59    3.25
  -5  -6  16   35.99    3.20
  -5   6  17    2.24    2.21
   5   6 -17    1.46    2.79
  -5  -6  17    0.84    2.10
  -5   6  18   13.77    2.46
   5  -6 -18   12.43    2.94
   5   6 -18   12.23    3.07
  -5  -6  18   13.44    2.36
  -5  -7   1   18.77    1.80
  -5  -7   2   41.06    2.97
  -5  -7   3    1.80    1.30
   5  -7  -4   51.78    4.21
  -5  -7   4   55.16    4.34
  -5  -7   4   62.19    4.06
   5  -7  -5  150.73   10.45
  -5  -7   5  157.17   10.57
  -5  -7   5  170.59   10.38
   5  -7  -6   19.24    2.74
  -5  -7   6   20.65    2.47
   5  -7  -7   65.83    5.21
  -5  -7   7   63.93    5.17
  -5  -7   7   77.30    5.00
  -5   7   8  123.56    8.52
   5  -7  -8  123.06    8.54
  -5  -7   8  130.11    8.36
  -5   7   9   -6.13    2.03
  -5  -7   9    3.75    2.14
   5  -7 -10   21.28    3.23
   5   7 -10   20.97    2.55
  -5   7  11    3.33    2.21
   5  -7 -11    4.09    2.60
   5   7 -11    4.77    2.26
  -5  -7  11    0.82    2.19
  -5   7  12  106.33    7.49
   5  -7 -12  107.43    7.62
   5   7 -12  105.30    7.65
  -5  -7  12  116.63    7.45
  -5   7  13   68.43    5.08
   5  -7 -13   70.38    5.43
   5   7 -13   67.21    5.34
  -5  -7  13   70.75    5.12
  -5   7  14   33.63    3.29
   5  -7 -14   29.87    3.79
  -5  -7  14   41.09    3.37
  -5   7  15   33.94    3.21
   5  -7 -15   32.26    3.61
   5   7 -15   29.47    3.63
  -5  -7  15   34.21    3.27
  -5   7  16    8.92    2.47
   5  -7 -16    8.42    2.80
   5   7 -16    7.47    2.84
   5  -7 -17   11.15    2.94
   5   7 -17    6.54    2.83
   5  -8  -1    9.44    2.45
  -5  -8   1   11.06    2.13
   5  -8  -2   29.42    3.00
  -5  -8   2   23.38    2.73
   5  -8  -3    1.28    2.14
  -5  -8   3    2.95    1.99
   5  -8  -4  272.30   18.01
  -5  -8   4  271.20   17.50
  -5  -8   5    0.79    1.99
  -5  -8   5    0.00    1.73
   5  -8  -6  178.99   12.27
  -5  -8   6  194.64   12.52
  -5  -8   6  195.17   12.20
   5  -8  -7    5.65    2.31
  -5  -8   7    5.08    2.06
  -5  -8   7    5.09    2.00
   5  -8  -8    2.03    2.36
  -5  -8   8    0.90    2.09
   5  -8  -9   68.37    5.19
  -5   8  10  138.09    9.21
   5  -8 -10  124.75    9.14
  -5  -8  10  142.35    9.02
  -5   8  11   10.94    2.29
   5  -8 -11   12.26    2.85
  -5  -8  11   15.19    2.45
  -5   8  12  202.11   13.79
   5   8 -12  200.96   13.86
  -5  -8  12  227.82   13.70
  -5   8  13   47.16    3.91
   5   8 -13   42.40    4.12
  -5  -8  13   46.04    3.84
  -5   8  14   75.50    5.97
   5  -8 -14   83.26    6.17
   5   8 -14   81.30    6.17
  -5  -8  14   94.23    5.99
   5  -8 -15   -1.58    2.73
   5   8 -15    0.71    2.55
  -5  -8  15   -0.54    2.26
  -5   8  16    3.83    2.43
   5  -8 -16    1.48    2.73
   5   8 -16    3.05    2.75
  -5  -8  16    4.51    2.31
  -5   8  17   13.35    2.61
   5  -8 -17   19.14    3.00
  -5  -8  17   12.47    2.54
   5  -9  -1    8.46    2.51
  -5  -9   1    9.32    2.09
   5  -9  -2   43.09    3.77
  -5  -9   2   41.24    3.54
   5  -9  -3   43.55    3.68
  -5  -9   3   40.76    3.51
   5  -9  -4   31.87    3.21
  -5  -9   4   34.11    3.18
   5  -9  -5    2.05    2.21
  -5  -9   5    2.41    2.07
  -5  -9   6   11.83    2.35
  -5  -9   7    1.96    1.92
  -5  -9   8   95.89    6.54
   5  -9  -9   -6.52    2.55
  -5  -9   9   -3.14    2.27
   5  -9 -10   40.64    3.96
  -5  -9  10   47.45    3.74
   5  -9 -11    4.87    2.65
   5   9 -11    3.96    2.43
  -5  -9  11   11.51    2.38
  -5   9  12   25.76    2.80
   5  -9 -12   23.26    3.19
   5   9 -12   23.21    3.04
  -5  -9  12   26.45    2.91
   5  -9 -13    3.87    2.69
   5   9 -13    0.46    2.79
  -5   9  14    3.25    2.21
   5  -9 -14    3.83    2.73
   5   9 -14    5.51    2.68
  -5   9  15    5.30    2.24
   5  -9 -15    4.31    2.68
   5   9 -15    9.26    2.77
  -5  -9  15    4.26    2.39
  -5   9  16   27.74    2.94
   5  -9 -16   27.24    3.30
  -5  -9  16   25.63    3.00
   5 -10  -1   23.04    3.03
  -5 -10   1   23.91    2.70
   5 -10  -2    2.74    2.40
  -5 -10   2   -1.92    2.08
   5 -10  -3    8.17    2.44
  -5 -10   3    8.16    2.20
   5 -10  -4   10.39    2.56
  -5 -10   4   15.65    2.49
   5 -10  -6   46.49    3.99
  -5 -10   6   45.14    3.87
   5 -10  -7    8.62    2.49
  -5 -10   7    6.98    2.25
   5  10 -11    1.56    2.34
  -5 -10  11   -0.50    2.31
   5  10 -12   -1.79    2.53
  -5 -10  12    2.76    2.32
   5  10 -13   17.42    2.85
  -5 -10  13   11.49    2.55
   5 -10 -14    5.85    2.74
  -5 -10  14    9.05    2.42
   5 -10 -15    3.16    2.71
  -5 -10  15    6.98    2.38
   5 -11  -1   33.38    3.46
  -5 -11   1   33.87    3.14
   5 -11  -3  182.60   12.36
  -5 -11   3  192.61   12.31
   5 -11  -4   62.23    4.94
  -5 -11   4   62.59    4.76
   5 -11  -5   13.66    2.73
  -5 -11   5   13.20    2.53
   5 -11  -6   14.66    2.83
  -5 -11   6   19.42    2.58
   5 -11  -7    8.80    2.58
  -5 -11   7   10.80    2.37
   5 -11  -8   13.33    2.69
   5 -11  -9   -2.45    2.46
   5  11 -11   37.66    3.66
   5  11 -13   22.21    3.12
   5 -12  -1    0.98    2.72
  -5 -12   1    1.58    2.18
   5 -12  -2   12.00    2.82
  -5 -12   2    8.18    2.31
   5 -12  -3    8.62    2.68
  -5 -12   3    5.98    2.28
   5 -12  -4   -4.10    2.70
  -5 -12   4   -3.32    2.36
   5 -12  -5   25.03    3.14
  -5 -12   5   22.17    2.79
   5 -12  -6   13.32    2.83
  -5 -12   6   15.22    2.50
  -5 -12   7    1.63    2.34
   5 -12  -8    1.90    2.54
   5 -12  -9   19.43    2.89
   5 -12 -10   10.30    2.67
   5 -12 -11   12.14    2.72
   5  12 -11   10.53    2.67
   5 -12 -12   -4.00    2.54
   5 -13  -1   35.65    3.77
  -5 -13   1   37.77    3.42
   5 -13  -2  119.61    8.24
  -5 -13   2  116.25    8.03
   5 -13  -3   18.68    2.99
  -5 -13   3   14.67    2.59
   5 -13  -4   31.47    3.61
  -5 -13   4   35.22    3.25
   5 -13  -5  116.98    8.18
   5 -13  -6   11.35    2.85
  -5 -13   6    9.47    2.36
   5 -13  -7   69.66    5.43
   5 -13  -8   12.63    2.87
   5 -13  -9   37.08    3.73
  -5 -14   1   40.47    3.62
   5 -14  -2    6.06    2.76
   5 -14  -3   13.09    2.88
  -5 -14   3   10.54    2.62
   5 -14  -4    1.78    2.77
  -5 -14   4    1.26    2.17
   5 -14  -5    1.44    2.75
  -4   0   1    1.06    1.43
  -4   0   1    1.11    1.40
  -4   0   2  124.79    8.28
  -4   0   3    0.07    1.41
  -4   0   4  236.02   15.03
  -4   0   5    0.03    0.63
  -4   0   5    0.52    1.38
   4   0  -5    0.65    1.73
  -4   0   6   31.72    2.18
  -4   0   6   35.72    2.65
   4   0  -6   31.83    2.22
   4   0  -6   32.08    2.23
  -4   0   7    0.24    0.89
  -4   0   7    1.22    1.64
   4   0  -7    0.64    0.88
   4   0  -7    0.01    0.92
   4   0  -7    0.13    2.00
  -4   0   8  446.08   30.30
  -4   0   8  492.55   30.50
   4   0  -8  489.20   30.34
   4   0  -8  492.33   30.35
   4   0  -8  545.67   30.74
  -4   0   9    0.38    1.08
  -4   0   9   -4.26    1.82
   4   0  -9    0.59    1.04
   4   0  -9    1.94    1.13
   4   0  -9   -3.25    2.26
  -4   0  10  185.91   11.72
   4   0 -10  174.94   11.89
  -4   0  11    0.36    1.84
   4   0 -11    2.06    2.56
  -4   0  12   77.18    5.34
   4   0 -12   72.90    5.61
   4   0 -13   -4.73    2.43
  -4   0  14    1.97    2.02
   4   0 -14    1.31    2.46
  -4   0  15    0.68    2.08
   4   0 -15   -0.80    2.52
  -4   0  16  262.18   16.75
   4   0 -16  259.69   16.96
  -4   0  17   -1.54    2.12
  -4   0  18  216.92   13.81
   4   0 -18  208.54   14.03
  -4   0  19   -4.48    2.25
   4   0 -19    0.86    2.87
  -4   0  20   27.01    2.90
   4   0 -20   23.67    3.32
  -4   1   1    0.37    1.26
  -4   1   1    0.60    1.32
  -4  -1   1    0.74    1.29
  -4   1   2  191.24   12.12
  -4  -1   2  190.27   12.16
  -4  -1   2  185.19   12.03
  -4   1   3    0.48    1.45
  -4  -1   3    0.27    1.42
  -4  -1   3    0.24    1.39
  -4   1   4  224.29   13.28
  -4   1   4  241.16   13.55
   4  -1  -4  231.11   13.29
   4  -1  -4  230.88   13.29
   4  -1  -4  243.60   13.71
  -4  -1   4  177.24   13.23
  -4  -1   4  199.73   13.27
  -4   1   5    5.76    0.80
  -4   1   5    8.59    1.63
   4  -1  -5    7.98    0.78
   4  -1  -5    6.69    0.84
   4  -1  -5    9.40    1.84
  -4  -1   5    4.48    0.76
  -4  -1   5    6.36    0.79
  -4   1   6  597.58   37.79
  -4   1   6  603.64   37.97
   4  -1  -6  634.60   37.80
   4  -1  -6  652.14   37.80
   4  -1  -6  676.92   38.22
   4   1  -6  596.71   37.92
   4   1  -6  614.83   37.96
   4   1  -6  622.09   38.81
  -4  -1   6  535.16   37.90
  -4  -1   6  550.99   37.76
  -4  -1   6  614.42   37.94
  -4   1   7    1.19    0.88
  -4   1   7    1.10    1.58
   4  -1  -7    0.88    0.85
   4  -1  -7    1.04    0.95
   4  -1  -7    1.23    2.08
   4   1  -7    1.60    0.94
   4   1  -7    0.31    1.01
   4   1  -7    0.70    1.96
  -4  -1   7    2.25    0.83
  -4  -1   7    1.24    0.89
  -4  -1   7    1.72    1.66
  -4   1   8    2.99    1.75
   4  -1  -8    2.23    0.96
   4  -1  -8    2.64    1.04
   4   1  -8    2.36    1.05
   4   1  -8    2.19    1.10
   4   1  -8    1.60    2.16
  -4  -1   8    2.23    1.72
  -4   1   9   36.28    2.66
  -4   1   9   40.71    3.16
   4  -1  -9   39.41    2.71
   4  -1  -9   41.86    2.76
   4  -1  -9   42.39    3.57
   4   1  -9   42.68    2.76
   4   1  -9   39.90    2.79
   4   1  -9   41.99    3.53
  -4  -1   9   34.60    2.70
  -4  -1   9   33.71    2.71
  -4  -1   9   39.68    3.11
   4  -1 -10  146.03    9.65
   4   1 -10  147.93    9.66
  -4  -1  10  142.19    9.43
   4  -1 -11  107.79    7.68
   4   1 -11  125.77    7.78
  -4  -1  11  105.72    7.40
  -4   1  12  122.41    8.00
   4  -1 -12  109.79    8.15
   4   1 -12  131.17    8.34
  -4  -1  12  119.66    8.00
  -4   1  13    9.17    2.16
   4  -1 -13    8.72    2.70
   4   1 -13   10.97    2.74
  -4  -1  13    9.93    1.99
  -4   1  14   41.74    3.41
   4  -1 -14   36.94    3.83
  -4  -1  14   41.11    3.34
  -4   1  15   15.33    2.43
   4  -1 -15   16.22    2.97
  -4   1  16   43.71    3.70
   4  -1 -16   47.31    4.10
   4   1 -16   44.97    4.09
  -4  -1  16   40.76    3.57
  -4   1  17   23.09    2.65
   4  -1 -17   17.53    3.14
   4   1 -17   17.91    3.25
  -4  -1  17   20.80    2.57
  -4   1  18   15.36    2.49
   4  -1 -18   14.29    3.12
   4   1 -18   16.75    3.11
  -4  -1  18   15.16    2.36
  -4   1  19   46.20    3.80
   4   1 -19   48.67    4.27
  -4  -1  19   43.15    3.69
   4  -1 -20   58.24    4.89
   4   1 -20   64.65    4.95
  -4  -1  20   58.14    4.57
   4  -2  -1    0.77    0.55
   4  -2  -1    0.34    0.58
   4  -2  -1    1.53    0.51
  -4  -2   1    0.04    0.37
  -4  -2   1    0.66    0.39
  -4  -2   1    0.66    1.52
  -4  -2   1    0.73    1.28
  -4   2   2  171.13    8.16
   4  -2  -2  148.91    7.73
   4  -2  -2  137.08    7.74
   4  -2  -2  147.06    7.73
   4  -2  -2  144.53    7.67
   4  -2  -2  166.24    8.09
  -4  -2   2  103.09    7.61
  -4  -2   2  105.45    7.61
  -4  -2   2  104.63    7.61
  -4  -2   2  165.35    8.06
  -4  -2   2  167.60    7.93
  -4   2   3   41.07    2.65
  -4   2   3   46.26    3.13
   4  -2  -3   57.54    3.12
  -4  -2   3   37.51    2.58
  -4  -2   3   38.49    2.59
  -4  -2   3   37.62    2.60
  -4  -2   3   50.02    3.14
  -4  -2   3   49.68    3.03
  -4   2   4   93.74    5.50
  -4   2   4   90.37    5.78
   4  -2  -4   86.37    5.47
   4  -2  -4   90.95    5.49
   4  -2  -4   99.01    5.80
  -4  -2   4   77.77    5.45
  -4  -2   4   81.03    5.46
  -4  -2   4   81.98    5.50
  -4  -2   4   94.52    5.96
  -4  -2   4   89.45    5.70
  -4   2   5    3.55    0.88
  -4   2   5    6.07    1.68
   4  -2  -5    4.32    0.82
   4  -2  -5    6.22    0.88
   4  -2  -5    7.09    1.78
  -4  -2   5    4.17    0.77
  -4  -2   5    4.06    0.83
  -4  -2   5    5.42    1.61
  -4   2   6   57.52    3.88
  -4   2   6   64.45    4.28
   4  -2  -6   57.46    3.87
   4  -2  -6   63.52    3.89
   4  -2  -6   67.24    4.43
  -4  -2   6   56.25    3.86
  -4  -2   6   57.10    3.86
  -4  -2   6   62.61    4.04
  -4  -2   6   61.61    4.19
  -4   2   7   19.64    1.70
  -4   2   7   23.81    2.27
   4  -2  -7   23.92    1.72
   4  -2  -7   23.14    1.72
   4  -2  -7   27.12    2.70
   4   2  -7   20.24    1.73
   4   2  -7   22.77    1.79
   4   2  -7   24.01    2.41
  -4  -2   7   21.89    1.67
  -4  -2   7   19.47    1.69
  -4   2   8  381.34   24.71
   4  -2  -8  404.46   24.73
   4  -2  -8  406.64   24.73
   4  -2  -8  416.25   25.03
   4   2  -8  364.52   24.79
   4   2  -8  381.19   24.83
   4   2  -8  405.83   25.18
  -4  -2   8  403.56   24.84
  -4   2   9   -0.27    1.08
  -4   2   9   -3.91    1.79
   4  -2  -9    0.42    2.25
   4   2  -9   -1.94    1.14
   4   2  -9    0.23    1.20
   4   2  -9    0.98    2.34
  -4  -2   9   -1.69    1.02
  -4  -2   9   -2.70    1.05
  -4  -2   9    0.81    1.70
  -4   2  10   38.58    3.15
   4   2 -10   37.46    3.48
  -4  -2  10   37.44    3.14
  -4   2  11    0.64    1.96
   4   2 -11    0.54    2.47
  -4  -2  11    0.69    1.94
  -4   2  12   46.93    3.52
   4  -2 -12   38.80    3.95
  -4  -2  12   41.06    3.43
  -4   2  13    9.82    2.23
   4  -2 -13   10.52    2.76
   4   2 -13   11.90    2.64
  -4  -2  13    9.78    2.12
  -4   2  14    6.41    2.11
   4  -2 -14    8.15    2.79
   4   2 -14    7.42    2.74
  -4  -2  14    9.69    2.12
  -4   2  15    9.23    2.22
   4  -2 -15   10.09    2.76
   4   2 -15   10.72    2.77
  -4  -2  15   10.88    2.22
  -4   2  16   70.42    4.90
   4  -2 -16   62.86    5.23
   4   2 -16   62.01    5.22
  -4  -2  16   68.22    4.86
  -4   2  17    2.51    2.13
   4  -2 -17    2.55    2.78
   4   2 -17    4.32    2.89
  -4  -2  17    4.14    2.08
   4  -2 -18   18.43    3.21
   4   2 -18   20.01    3.17
  -4   2  19    2.60    2.23
   4  -2 -19    1.17    2.71
   4   2 -19   -2.99    2.83
  -4  -2  19    3.33    2.06
  -4   2  20    3.50    2.15
   4  -2 -20    1.87    2.67
   4   2 -20    3.29    2.86
  -4  -2  20    2.01    2.05
   4  -3  -1    0.28    0.94
   4  -3  -1    1.82    1.00
   4  -3  -1    0.98    0.74
   4  -3  -1    1.55    1.38
  -4  -3   1    0.35    0.69
  -4  -3   1    1.27    0.72
  -4  -3   1    0.88    0.76
  -4  -3   1   -0.73    1.51
  -4   3   2   54.05    3.51
   4  -3  -2   50.56    3.39
   4  -3  -2   58.91    3.70
  -4  -3   2   51.57    3.38
  -4  -3   2   53.44    3.39
  -4  -3   2   45.78    3.39
  -4  -3   2   55.39    3.80
  -4  -3   2   59.37    3.64
  -4   3   3    0.55    0.82
  -4   3   3    0.83    1.60
   4  -3  -3    1.14    0.74
  -4  -3   3    0.64    0.69
  -4  -3   3    1.17    0.77
  -4  -3   3    1.92    1.66
  -4  -3   3    0.52    1.37
  -4   3   4  221.57   13.29
  -4   3   4  222.03   13.54
   4  -3  -4  194.29   13.33
   4  -3  -4  220.89   13.29
   4  -3  -4  236.12   13.52
  -4  -3   4  198.23   13.26
  -4  -3   4  204.82   13.27
  -4  -3   4  204.78   13.29
  -4  -3   4  214.15   13.62
  -4  -3   4  217.86   13.42
  -4   3   5   22.19    1.71
   4  -3  -5   19.04    1.67
   4  -3  -5   23.03    1.70
   4  -3  -5   25.32    2.38
  -4  -3   5   21.81    1.65
  -4  -3   5   20.64    1.64
  -4  -3   5   23.75    1.78
  -4  -3   5   21.04    2.25
  -4  -3   5   23.62    2.15
  -4   3   6  516.74   32.49
   4  -3  -6  568.16   32.53
   4  -3  -6  539.98   32.49
   4  -3  -6  578.18   32.77
  -4  -3   6  468.73   32.46
  -4  -3   6  470.22   32.45
  -4  -3   6  514.12   32.62
  -4  -3   6  553.02   32.61
  -4   3   7   12.20    2.04
   4  -3  -7   14.02    1.31
   4  -3  -7   12.93    1.39
   4  -3  -7   14.81    2.43
  -4  -3   7   15.00    1.36
  -4  -3   7   14.13    1.37
  -4  -3   7   13.42    1.98
  -4   3   8   98.00    6.44
  -4   3   8  111.06    6.73
   4  -3  -8  111.43    6.94
   4   3  -8   98.31    6.87
  -4  -3   8   92.57    6.42
  -4  -3   8   97.19    6.44
  -4  -3   8  111.56    6.70
  -4   3   9    2.12    1.81
   4  -3  -9    0.25    2.40
   4   3  -9    1.78    2.24
  -4   3  10   61.08    4.40
   4  -3 -10   60.11    4.81
  -4   3  11    5.77    1.92
   4  -3 -11    7.05    2.70
   4   3 -11    5.70    2.43
  -4  -3  11    4.48    1.97
   4  -3 -12   34.96    3.68
  -4  -3  12   34.02    3.11
  -4   3  13   24.31    2.65
   4   3 -13   28.22    3.12
  -4  -3  13   25.05    2.63
  -4   3  14   14.73    2.32
   4  -3 -14   14.05    2.92
   4   3 -14   12.36    2.75
  -4  -3  14   17.93    2.30
  -4   3  15    0.81    2.08
   4  -3 -15    2.58    2.60
   4   3 -15    2.34    2.59
  -4  -3  15    0.38    2.04
   4  -3 -16   51.09    4.22
   4   3 -16   41.64    4.26
  -4  -3  16   48.39    3.82
  -4   3  17    2.81    2.11
   4  -3 -17   -6.57    2.87
   4   3 -17    0.33    2.71
  -4  -3  17    0.16    2.08
  -4   3  18    6.71    2.24
   4  -3 -18    3.26    2.80
   4   3 -18    3.36    2.86
  -4  -3  18    7.81    2.21
  -4   3  19    4.34    2.19
   4  -3 -19    5.24    2.97
  -4  -3  19    6.21    2.16
  -4   3  20   75.10    5.47
   4  -3 -20   77.40    5.88
   4   3 -20   77.96    5.93
   4  -4  -1    0.48    0.87
   4  -4  -1    1.40    1.22
  -4  -4   1    0.46    0.84
  -4  -4   1    1.28    1.74
  -4  -4   1    2.25    1.07
  -4   4   2 1034.60   60.48
   4  -4  -2  923.87   59.98
   4  -4  -2  967.26   60.10
  -4  -4   2 1005.05   60.24
  -4  -4   2  940.60   60.19
  -4  -4   2  918.27   59.96
  -4  -4   2  980.75   60.26
  -4  -4   2  965.12   60.09
  -4   4   3   36.60    2.47
   4  -4  -3   33.16    2.43
   4  -4  -3   37.03    2.77
  -4  -4   3   34.32    2.42
  -4  -4   3   33.63    2.41
  -4  -4   3   34.90    2.43
  -4  -4   3   36.44    2.90
  -4   4   4  367.09   21.84
  -4   4   4  361.55   22.19
   4  -4  -4  339.62   21.80
   4  -4  -4  360.99   21.96
  -4  -4   4  337.89   21.79
  -4  -4   4  342.64   21.80
  -4  -4   4  329.52   21.82
  -4  -4   4  353.81   21.90
  -4   4   5   55.83    3.77
   4  -4  -5   48.96    3.36
   4  -4  -5   51.89    3.35
  -4  -4   5   47.25    3.33
  -4  -4   5   50.52    3.36
  -4  -4   5   45.76    3.41
  -4  -4   5   53.34    3.63
  -4   4   6  283.53   18.05
  -4   4   6  289.45   18.25
   4  -4  -6  289.40   18.13
   4  -4  -6  276.50   18.04
   4  -4  -6  298.67   18.28
  -4  -4   6  288.55   18.14
  -4   4   7  189.31   12.15
  -4   4   7  208.69   12.38
   4  -4  -7  229.70   12.54
  -4  -4   7  176.70   12.12
  -4  -4   7  180.02   12.13
  -4  -4   7  187.75   12.25
  -4  -4   7  214.35   12.32
  -4   4   8  402.99   24.26
  -4   4   8  404.89   24.43
   4  -4  -8  410.29   24.24
   4  -4  -8  389.99   24.22
   4  -4  -8  434.32   24.56
  -4  -4   8  344.55   24.19
  -4  -4   8  341.70   24.18
  -4  -4   8  385.97   24.45
  -4  -4   8  407.76   24.37
  -4   4   9   -3.09    1.93
   4  -4  -9   -1.81    2.41
   4   4  -9   -2.16    2.14
  -4  -4   9    0.15    1.22
  -4  -4   9   -1.75    1.93
  -4   4  10  178.77   11.47
   4  -4 -10  191.50   11.67
   4   4 -10  170.57   11.66
  -4  -4  10  169.91   11.43
  -4   4  11    0.78    1.85
   4  -4 -11    0.14    2.54
   4   4 -11    1.65    2.33
  -4  -4  11    2.80    1.96
  -4   4  12   52.43    4.22
   4  -4 -12   59.41    4.73
   4   4 -12   60.14    4.59
  -4   4  13   29.76    2.86
   4  -4 -13   28.38    3.37
   4   4 -13   33.10    3.34
  -4  -4  13   25.86    2.73
   4  -4 -14    5.30    2.78
   4   4 -14    2.93    2.55
  -4  -4  14    3.69    1.91
  -4   4  15   44.70    3.66
   4  -4 -15   44.13    4.07
   4   4 -15   45.59    4.13
  -4  -4  15   42.56    3.65
  -4   4  16   60.81    4.70
   4   4 -16   57.67    5.04
  -4  -4  16   67.64    4.67
  -4   4  17    0.42    2.06
   4  -4 -17   -3.29    2.70
  -4  -4  17    3.20    2.08
  -4   4  18   32.32    3.20
   4  -4 -18   40.49    3.84
   4   4 -18   29.78    3.73
  -4  -4  18   36.76    3.25
  -4   4  19   -1.76    2.14
   4  -4 -19    1.32    2.85
   4   4 -19    1.35    2.94
  -4  -4  19    0.14    2.20
   4  -4 -20    0.83    2.68
   4   4 -20    2.11    2.78
  -4  -4  20    3.43    2.27
   4  -5  -1   11.20    1.25
   4  -5  -1   12.95    2.01
  -4  -5   1    9.46    1.27
  -4  -5   1   11.66    1.87
  -4  -5   1   10.43    1.28
  -4   5   2   24.43    1.92
   4  -5  -2   21.71    1.84
   4  -5  -2   24.70    2.06
  -4  -5   2   21.08    1.85
  -4  -5   2   23.51    1.89
  -4  -5   2   21.57    1.84
  -4  -5   2   27.70    1.92
  -4   5   3   24.11    1.97
   4  -5  -3   19.56    1.90
   4  -5  -3   26.49    2.26
  -4  -5   3   24.72    1.89
  -4  -5   3   26.73    1.94
  -4  -5   3   26.42    2.43
  -4  -5   3   24.78    2.06
  -4   5   4   57.13    3.86
  -4   5   4   54.51    4.20
   4  -5  -4   56.05    3.82
   4  -5  -4   58.87    4.12
  -4  -5   4   55.43    4.21
  -4  -5   4   60.79    4.02
  -4   5   5   39.35    2.80
  -4   5   5   38.01    3.26
   4  -5  -5   44.88    3.23
  -4  -5   5   35.57    2.86
  -4  -5   5   40.27    3.26
  -4   5   6  582.55   35.73
  -4   5   6  579.91   36.04
   4  -5  -6  575.17   36.24
   4  -5  -6  583.75   35.70
   4  -5  -6  588.43   35.89
  -4  -5   6  543.12   35.69
  -4  -5   6  521.40   35.68
  -4  -5   6  570.69   36.96
  -4  -5   6  606.91   35.82
  -4   5   7   61.96    4.67
   4  -5  -7   74.02    4.86
  -4  -5   7   57.60    4.43
  -4  -5   7   70.39    4.60
  -4   5   8  182.94   11.31
  -4  -5   8  159.46   11.21
  -4  -5   8  182.75   11.25
  -4   5   9   -0.30    1.99
   4  -5  -9    0.76    2.48
  -4  -5   9    0.48    1.47
  -4  -5   9   -3.12    1.88
  -4   5  10    4.96    2.05
   4  -5 -10    4.79    2.60
   4   5 -10    7.23    2.35
  -4  -5  10    5.19    1.99
   4  -5 -11  166.95   11.10
  -4  -5  11  168.21   10.90
  -4   5  12   24.18    2.68
   4   5 -12   22.25    2.93
  -4  -5  12   22.86    2.62
  -4   5  13    5.99    2.21
   4  -5 -13   11.80    2.78
   4   5 -13    9.24    2.59
  -4  -5  13    3.08    2.01
  -4   5  14   50.55    4.08
   4  -5 -14   50.45    4.38
   4   5 -14   52.59    4.43
  -4  -5  14   51.46    3.97
  -4   5  15    1.83    2.16
   4  -5 -15    1.06    2.66
  -4   5  16   65.15    4.80
   4  -5 -16   65.15    5.16
   4   5 -16   61.12    5.17
  -4  -5  16   63.78    4.70
  -4   5  17    4.13    2.22
   4  -5 -17    0.70    2.71
   4   5 -17    2.95    2.78
  -4  -5  17    3.66    1.98
  -4   5  18    4.87    2.29
   4  -5 -18    5.93    2.76
   4   5 -18    7.07    2.84
  -4  -5  18    6.97    2.21
  -4   5  19   14.08    2.54
   4   5 -19   15.96    3.18
  -4  -5  19   16.66    2.45
  -4   5  20   20.01    2.76
   4   5 -20   23.09    3.25
  -4   6   1  144.59    9.01
   4  -6  -1  140.14    8.73
   4  -6  -1  124.51    8.69
   4   6  -1  139.57    8.99
  -4  -6   1  145.08    8.98
  -4   6   2  259.85   16.63
   4  -6  -2  240.68   16.50
  -4  -6   2  267.81   16.78
  -4  -6   2  264.56   16.78
  -4  -6   2  272.91   16.74
  -4  -6   2  273.53   16.52
  -4   6   3  174.27   11.78
   4  -6  -3  172.94   11.74
  -4  -6   3  196.06   11.81
  -4  -6   3  188.08   11.82
  -4  -6   3  184.66   11.98
  -4  -6   3  197.08   11.79
  -4   6   4   30.25    2.31
   4  -6  -4   26.50    2.22
   4  -6  -4   31.22    2.75
  -4  -6   4   30.67    2.24
  -4  -6   4   27.03    2.26
  -4  -6   4   27.16    2.31
  -4  -6   4   26.96    2.78
  -4  -6   4   32.10    2.44
  -4   6   5  234.23   15.40
   4  -6  -5  237.04   14.96
  -4  -6   5  214.50   14.82
  -4  -6   5  234.67   15.09
  -4  -6   5  250.02   14.88
  -4   6   6  201.56   12.67
   4  -6  -6  204.36   12.60
  -4  -6   6  179.14   12.40
  -4  -6   6  195.00   12.79
  -4  -6   6  198.54   12.47
  -4   6   7  165.16    9.91
   4  -6  -7  168.86    9.97
  -4  -6   7  130.01    9.69
  -4   6   8  189.31   12.19
   4  -6  -8  198.28   12.28
  -4  -6   8  175.95   12.09
  -4  -6   8  191.04   12.10
   4  -6  -9   50.66    4.19
  -4  -6   9   48.39    3.80
  -4  -6  10  389.84   24.71
  -4   6  11  191.30   11.59
   4   6 -11  165.20   11.70
  -4  -6  11  174.08   11.51
  -4   6  12   56.07    4.35
   4  -6 -12   61.75    4.67
   4   6 -12   52.46    4.58
  -4  -6  12   58.39    4.31
  -4   6  13   41.00    3.49
   4  -6 -13   40.31    3.86
  -4  -6  13   40.86    3.45
  -4   6  14   21.24    2.74
   4  -6 -14   19.23    2.96
   4   6 -14   13.79    3.03
  -4  -6  14   17.87    2.46
  -4   6  15   31.86    3.16
   4  -6 -15   29.85    3.56
   4   6 -15   32.07    3.54
  -4  -6  15   29.98    2.98
  -4   6  16   84.66    6.06
   4  -6 -16   81.10    6.26
   4   6 -16   84.38    6.31
  -4  -6  16   88.74    5.98
   4  -6 -17   22.62    3.11
   4   6 -17   18.53    3.40
  -4  -6  17   16.41    2.50
  -4   6  18  183.68   11.20
   4  -6 -18  167.56   11.29
   4   6 -18  160.77   11.33
  -4  -6  18  165.24   11.10
  -4   6  19    0.32    2.40
   4  -6 -19    1.85    2.63
   4  -7  -1   82.17    6.20
   4  -7  -1  118.88    6.81
   4   7  -1  108.45    6.69
  -4  -7   1   99.73    6.37
  -4  -7   1  106.52    6.59
  -4  -7   1   98.99    6.20
   4  -7  -2   43.57    3.49
  -4  -7   2   37.21    3.03
  -4  -7   2   41.36    3.34
  -4  -7   2   43.49    2.89
   4  -7  -3   32.77    2.65
  -4  -7   3   30.00    2.44
  -4  -7   3   30.30    2.86
   4  -7  -4   27.97    2.73
  -4  -7   4   27.39    2.44
  -4  -7   4   30.17    2.81
  -4  -7   4   35.39    2.54
  -4  -7   5    1.27    1.37
  -4  -7   5    2.00    2.03
  -4  -7   5    2.33    1.70
   4  -7  -6  165.05   10.53
  -4  -7   6  149.19   10.42
  -4  -7   6  161.21   10.66
  -4  -7   6  170.53   10.44
   4  -7  -7    2.50    2.28
  -4  -7   7    5.35    2.09
  -4  -7   7    5.44    1.92
  -4   7   8   31.90    3.06
   4  -7  -8   30.35    3.17
  -4  -7   8   30.58    2.87
   4  -7  -9    4.11    2.48
  -4  -7   9    2.55    2.03
  -4   7  10  180.68   11.61
   4  -7 -10  192.39   11.69
   4   7 -10  160.24   11.74
  -4   7  11   23.71    2.67
  -4   7  12   28.86    2.82
   4  -7 -12   21.63    3.26
   4   7 -12   22.63    3.18
  -4  -7  12   26.65    2.72
  -4   7  13   23.41    2.85
   4   7 -13   28.89    3.29
  -4  -7  13   28.88    2.81
  -4   7  14   39.28    3.61
   4   7 -14   41.75    3.91
  -4  -7  14   44.70    3.58
   4  -7 -15   15.13    2.96
   4   7 -15   14.18    2.88
  -4  -7  15   10.22    2.34
  -4   7  16    3.04    2.27
   4  -7 -16    1.02    2.83
   4   7 -16    1.88    2.83
  -4  -7  16   -2.64    2.12
  -4   7  17   -8.79    2.34
   4  -7 -17    0.91    2.67
   4   7 -17    0.48    2.96
  -4  -7  17    0.99    2.09
  -4   7  18   10.80    2.44
   4  -7 -18    9.99    2.77
   4   7 -18    8.22    3.00
  -4  -7  18    8.00    2.24
  -4   7  19   -3.82    2.33
   4   7 -19    1.90    2.80
   4  -8  -1    2.43    2.21
  -4  -8   1    0.48    1.35
  -4  -8   1    1.93    1.93
   4  -8  -2  -12.10    2.38
  -4  -8   2   -0.10    1.35
  -4  -8   2    2.07    1.86
   4  -8  -3   15.83    2.02
   4  -8  -3   15.36    2.46
  -4  -8   3   16.22    1.83
  -4  -8   3   17.06    2.36
  -4  -8   3   19.05    1.66
   4  -8  -4    0.88    1.85
   4  -8  -4   -1.93    2.08
  -4  -8   4    0.55    1.99
  -4  -8   4    2.38    1.51
   4  -8  -5    4.53    2.06
  -4  -8   5    7.43    2.14
   4  -8  -6   57.99    4.58
  -4  -8   6   64.26    4.41
  -4  -8   7   26.24    2.65
   4  -8  -8  274.86   17.76
  -4  -8   8  279.24   17.68
  -4   8   9   35.99    3.20
   4  -8  -9   36.11    3.46
  -4  -8   9   35.05    3.20
  -4   8  10   61.54    4.58
   4  -8 -10   61.46    4.68
  -4  -8  10   57.14    4.48
  -4   8  11   29.72    3.18
   4  -8 -11   31.83    3.49
   4   8 -11   38.06    3.52
  -4  -8  11   36.22    3.12
  -4   8  12    0.88    2.29
   4  -8 -12   -3.72    2.65
   4   8 -12    0.51    2.43
  -4  -8  12    0.40    2.05
   4  -8 -13    2.92    2.59
   4   8 -13    0.36    2.50
  -4  -8  13    1.48    2.03
  -4   8  14    3.94    2.27
   4  -8 -14    2.00    2.66
  -4   8  15    0.31    2.24
   4  -8 -15    1.09    2.62
   4   8 -15    0.44    2.67
  -4  -8  15    1.69    2.15
  -4   8  16   55.55    4.54
   4  -8 -16   63.08    4.80
  -4  -8  16   57.67    4.46
  -4   8  17   28.09    3.04
   4  -8 -17   25.97    3.31
   4   8 -17   28.77    3.57
  -4  -8  17   27.84    2.92
   4   8 -18   79.98    5.93
  -4  -8  18   73.94    5.47
  -4  -9   1  188.72   12.27
  -4  -9   2    1.45    1.89
  -4  -9   4  145.77    9.40
   4  -9  -5    1.16    2.01
   4  -9  -5    0.59    2.24
  -4  -9   5    2.98    2.12
  -4  -9   5    2.16    1.64
   4  -9  -6   11.64    2.32
  -4  -9   6   13.73    2.32
  -4  -9   6   10.97    2.01
   4  -9  -7   15.52    2.66
  -4  -9   7   22.62    2.57
  -4  -9   7   21.72    2.40
   4  -9  -8    4.21    2.36
   4  -9  -9    8.03    2.55
  -4  -9   9   10.91    2.26
  -4  -9  10    7.82    2.16
  -4   9  11    4.23    2.18
   4  -9 -11    1.41    2.54
   4   9 -11    6.66    2.46
  -4  -9  11    6.13    2.13
  -4   9  12   32.65    2.98
   4  -9 -12   25.26    3.27
   4   9 -12   26.07    3.27
  -4  -9  12   27.88    2.93
  -4   9  13   -3.40    2.18
   4  -9 -13    0.90    2.60
   4   9 -13    1.34    2.57
  -4  -9  13    0.00    2.12
  -4   9  14   -3.54    2.42
   4  -9 -14    0.41    2.59
  -4  -9  14   -0.60    2.16
  -4   9  15   68.72    5.06
   4  -9 -15   64.50    5.20
   4   9 -15   63.92    5.25
  -4  -9  15   66.97    4.90
   4  -9 -16    1.24    2.60
   4   9 -16  -10.41    3.05
  -4  -9  16    1.07    2.19
  -4   9  17    2.23    2.42
   4  -9 -17    4.78    2.65
   4   9 -17    7.42    2.99
  -4  -9  17    1.57    2.19
  -4 -10   2   35.12    3.18
   4 -10  -3   18.50    2.71
  -4 -10   3   14.89    2.43
   4 -10  -4   57.89    4.54
  -4 -10   4   54.24    4.37
   4 -10  -5    0.09    2.23
  -4 -10   5    1.37    2.06
   4 -10  -6    8.98    2.45
  -4 -10   6    5.63    2.07
  -4 -10   6    7.45    1.88
   4 -10  -7    5.80    2.40
   4 -10  -7    6.61    2.38
  -4 -10   7    6.36    2.20
  -4 -10   7    6.21    1.96
   4 -10  -8  348.71   21.82
  -4 -10   8  336.36   21.71
   4 -10 -10   51.83    4.39
  -4 -10  10   55.62    4.18
   4 -10 -11    0.35    2.52
   4  10 -11   -6.16    2.54
   4 -10 -12    1.79    2.73
   4  10 -12    0.77    2.64
   4 -10 -13    2.74    2.66
   4  10 -13    9.09    2.89
  -4 -10  13    9.02    2.26
   4  10 -14    2.89    2.70
  -4 -10  14    5.71    2.21
  -4  10  15    5.39    2.30
   4  10 -15    7.44    2.79
  -4 -10  15    8.04    2.26
  -4  10  16   47.07    4.25
   4  10 -16   55.58    4.66
  -4 -10  16   57.51    4.20
  -4  10  17    5.28    2.27
   4 -11  -1  173.27   11.21
  -4 -11   1  165.24   11.07
   4 -11  -2   26.13    3.12
  -4 -11   2   26.11    2.80
   4 -11  -3   23.96    3.06
  -4 -11   3   21.45    2.64
   4 -11  -4   30.75    3.32
  -4 -11   4   30.39    3.06
   4 -11  -5    2.20    2.46
  -4 -11   5    3.27    2.39
   4 -11  -6   81.59    5.89
  -4 -11   6   78.52    5.79
  -4 -11   7    1.93    2.28
   4 -11  -8   48.18    4.15
   4 -11  -9    9.65    2.61
  -4 -11   9   13.62    2.25
  -4 -11  10   25.06    2.78
   4 -11 -11   10.80    2.78
   4  11 -11   10.23    2.72
  -4 -11  11   11.12    2.33
   4 -11 -12    0.71    2.68
   4  11 -12   -1.10    2.68
  -4 -11  12    2.14    2.18
   4 -11 -13    3.24    2.56
   4  11 -13   -7.64    2.86
  -4 -11  13   -0.27    2.16
   4 -11 -14   20.42    3.04
   4  11 -14   25.38    3.28
  -4 -11  14   22.04    2.73
   4 -11 -15    0.00    2.81
   4  11 -15    0.40    2.71
  -4 -11  15    1.99    2.19
   4 -12  -1   29.78    3.46
  -4 -12   1   26.53    2.98
   4 -12  -2  105.09    7.31
  -4 -12   2  102.45    7.12
   4 -12  -3   73.22    5.67
  -4 -12   3   77.50    5.55
   4 -12  -4   57.36    4.75
  -4 -12   4   59.72    4.57
   4 -12  -6   -0.60    2.64
  -4 -12   6    4.24    2.24
   4 -12  -7    3.54    2.58
  -4 -12   7    3.44    2.23
   4 -12  -8   47.02    4.11
   4 -12  -9    4.18    2.55
   4 -12 -10   20.27    2.97
   4  12 -11   21.38    3.03
   4 -12 -12    1.79    2.47
   4  12 -12    0.00    2.56
   4  12 -13   25.23    3.28
   4  12 -14    0.51    2.72
   4 -13  -1   55.57    4.64
  -4 -13   1   54.31    4.27
   4 -13  -3    8.59    2.88
  -4 -13   3   11.51    2.52
   4 -13  -4   56.93    4.85
  -4 -13   4   61.76    4.63
   4 -13  -5    3.35    2.72
  -4 -13   5    6.02    2.26
   4 -13  -6   49.23    4.25
  -4 -13   6   45.39    4.03
   4 -13  -7   10.43    2.90
  -4 -13   7   13.15    2.47
   4 -13  -9   31.61    3.53
   4 -13 -10   11.12    2.79
   4 -13 -11   26.92    3.22
   4  13 -11   23.45    3.22
   4  13 -12   14.88    2.89
   4 -14  -1   -0.13    2.71
  -4 -14   1   -1.75    2.22
   4 -14  -2    4.91    2.80
  -4 -14   2    2.73    2.31
   4 -14  -3   52.37    4.63
  -4 -14   3   55.31    4.35
   4 -14  -4   -1.42    2.78
  -4 -14   4   -0.29    2.25
   4 -14  -5   36.46    3.98
  -4 -14   5   43.28    3.67
   4 -14  -6   24.52    3.28
   4 -14  -7   40.71    3.98
   4 -14  -8   44.70    4.18
   4 -14  -9    1.35    2.74
   4  14 -10    0.10    2.46
   4 -15  -1    5.34    2.71
  -4 -15   1    9.42    2.38
  -4 -15   2    5.70    2.48
   4 -15  -3   52.63    4.57
   4 -15  -4   28.56    3.56
  -4 -15   4   32.34    3.17
   4 -15  -5    2.68    2.77
  -4 -15   5    2.92    2.28
   4 -15  -6    5.51    2.81
  -4 -15   6    5.29    2.49
  -3   0   1   -2.63    1.23
  -3   0   1    0.73    1.23
  -3   0   2    2.13    1.24
  -3   0   2    2.75    1.29
  -3   0   3    0.22    0.51
  -3   0   3    0.31    1.26
   3   0  -3    0.10    0.50
   3   0  -3    0.60    0.55
  -3   0   4   13.69    1.28
  -3   0   4   18.04    1.73
   3   0  -4   18.45    1.29
   3   0  -4   18.18    1.31
  -3   0   5    0.29    0.73
  -3   0   5    0.33    0.75
  -3   0   5   -0.52    1.35
   3   0  -5   -0.36    0.77
   3   0  -5    0.53    0.82
   3   0  -5    0.82    1.59
  -3   0   6  278.18   18.21
   3   0  -6  286.82   18.14
   3   0  -6  286.96   18.14
   3   0  -6  309.13   18.43
  -3   0   7    0.70    0.87
  -3   0   7    0.56    0.93
  -3   0   7    1.18    1.49
   3   0  -7   -1.34    1.81
  -3   0   8  153.52   10.26
  -3   0   8  151.85   10.22
  -3   0   8  157.81   10.33
   3   0  -8  167.31   10.24
   3   0  -8  167.36   10.25
   3   0  -8  174.61   10.53
  -3   0   9    0.05    1.08
  -3   0   9    0.33    1.09
   3   0  -9    0.60    1.21
   3   0  -9   -0.59    1.18
   3   0  -9    3.69    2.26
  -3   0  10   47.86    3.60
  -3   0  10   55.18    3.63
  -3   0  10   57.23    3.94
   3   0 -10   51.77    3.62
   3   0 -10   53.49    3.64
   3   0 -10   49.62    4.21
  -3   0  11    0.22    1.19
  -3   0  11    0.47    1.31
  -3   0  11    0.89    1.77
   3   0 -11    0.80    1.25
   3   0 -11    0.04    1.33
   3   0 -11    0.13    2.34
  -3   0  12   -1.95    1.29
  -3   0  12    0.49    1.36
  -3   0  12   -3.48    1.91
   3   0 -12    0.38    2.43
  -3   0  13    0.38    1.98
  -3   0  15    0.71    1.98
   3   0 -15    0.12    2.71
  -3   0  16   30.49    2.84
   3   0 -16   26.17    3.47
  -3   0  17    0.63    2.03
   3   0 -17   -3.53    2.75
  -3   0  18    3.38    2.04
   3   0 -18    3.55    2.73
   3   0 -19    0.81    2.77
  -3   0  20    0.84    2.11
   3   0 -20    0.60    2.80
  -3   0  21   -5.40    2.21
   3   0 -21    2.44    2.85
  -3   1   1  146.24    9.14
  -3   1   1  149.12    8.83
   3  -1  -1  137.21    8.55
   3  -1  -1  136.69    8.55
   3  -1  -1  130.51    8.53
  -3  -1   1  141.72    8.75
  -3   1   2   17.84    1.15
  -3   1   2   18.81    1.73
   3  -1  -2   15.43    1.09
   3  -1  -2   15.71    1.12
  -3  -1   2   14.95    1.06
  -3  -1   2   15.10    1.07
  -3  -1   2   18.71    1.79
  -3  -1   2   19.89    1.60
  -3   1   3  170.14   10.93
  -3   1   3  177.88   11.10
   3  -1  -3  175.82   10.92
   3  -1  -3  185.58   10.93
   3  -1  -3  185.71   11.26
  -3  -1   3  160.17   10.90
  -3  -1   3  169.21   10.91
  -3  -1   3  176.87   11.00
  -3  -1   3  192.83   11.40
  -3  -1   3  174.35   11.04
  -3   1   4  157.91   10.14
  -3   1   4  148.09   10.27
   3  -1  -4  159.66   10.13
   3  -1  -4  168.59   10.14
   3   1  -4  169.87   10.20
   3   1  -4  174.79   10.22
  -3  -1   4  148.85   10.12
  -3  -1   4  156.62   10.14
  -3  -1   4  167.28   10.27
  -3   1   5   17.72    1.46
  -3   1   5   18.85    1.89
   3  -1  -5   19.64    1.48
   3  -1  -5   19.31    1.48
   3  -1  -5   17.34    2.10
   3   1  -5   21.08    1.51
   3   1  -5   19.12    1.53
  -3  -1   5   18.82    1.44
  -3  -1   5   18.35    1.45
  -3  -1   5   17.18    1.83
  -3   1   6    9.04    0.95
  -3   1   6    6.72    1.51
   3  -1  -6    7.74    1.04
   3  -1  -6    6.47    1.07
   3   1  -6    9.04    1.05
   3   1  -6    7.33    1.10
   3   1  -6    6.52    1.83
  -3  -1   6    8.02    0.96
  -3  -1   6    7.99    0.99
  -3  -1   6    7.69    1.51
  -3   1   7   22.82    1.91
   3  -1  -7   24.80    2.58
   3   1  -7   24.14    2.55
  -3  -1   7   26.44    1.87
  -3  -1   7   25.03    1.86
  -3  -1   7   26.14    2.29
  -3   1   8  741.91   48.95
  -3   1   8  766.53   49.06
   3  -1  -8  807.88   49.00
   3  -1  -8  814.47   48.99
   3  -1  -8  835.99   49.29
   3   1  -8  806.74   49.01
   3   1  -8  808.04   49.01
   3   1  -8  826.67   49.37
  -3  -1   8  755.27   48.97
  -3  -1   8  706.26   48.93
  -3  -1   8  803.10   49.10
  -3   1   9   26.69    2.18
  -3   1   9   28.03    2.52
   3  -1  -9   28.54    2.18
   3  -1  -9   29.49    2.19
   3  -1  -9   26.03    2.85
   3   1  -9   26.57    2.19
   3   1  -9   28.41    2.19
   3   1  -9   30.13    2.93
  -3  -1   9   27.66    2.15
  -3  -1   9   28.28    2.16
  -3  -1   9   26.41    2.52
  -3   1  10  440.80   27.91
  -3   1  10  457.26   28.02
   3  -1 -10  463.55   27.94
   3  -1 -10  455.20   27.92
   3  -1 -10  464.80   28.18
   3   1 -10  436.71   27.93
   3   1 -10  446.68   27.94
  -3  -1  10  410.46   27.91
  -3  -1  10  432.96   27.91
  -3  -1  10  446.46   28.04
  -3   1  11    5.92    1.42
  -3   1  11    6.80    1.89
   3  -1 -11    6.47    1.38
   3  -1 -11    6.59    1.42
   3  -1 -11    7.56    2.41
   3   1 -11    6.01    1.42
   3   1 -11    6.34    1.42
  -3  -1  11    5.57    1.30
  -3  -1  11    6.38    1.32
  -3  -1  11    6.40    1.93
  -3   1  12   62.00    4.48
   3  -1 -12   57.89    4.86
   3   1 -12   66.27    4.88
  -3   1  13    1.09    1.93
   3  -1 -13    3.14    2.55
   3   1 -13    0.12    2.29
  -3  -1  13    0.91    1.97
  -3   1  15   20.06    2.41
   3   1 -15   15.65    2.98
  -3  -1  15   20.14    2.38
  -3   1  16  143.65    9.00
   3  -1 -16  127.90    9.23
   3   1 -16  138.02    9.28
  -3  -1  16  133.52    8.99
   3  -1 -17    4.11    2.76
   3   1 -17    0.42    2.64
  -3  -1  17    1.89    2.07
  -3   1  18  371.93   23.48
   3  -1 -18  362.38   23.62
   3   1 -18  348.14   23.65
  -3  -1  18  389.38   23.54
  -3   1  19    9.34    2.22
   3  -1 -19    6.11    2.88
   3   1 -19   10.21    2.97
  -3  -1  19   11.72    2.27
  -3   1  20    1.62    2.31
   3  -1 -20    0.89    2.85
  -3  -1  20    0.05    2.19
  -3   1  21    0.39    2.26
   3  -1 -21    2.11    2.89
   3   1 -21    0.00    2.69
  -3   2   1  206.86   12.63
  -3   2   1  209.23   12.85
   3  -2  -1  181.63   12.32
   3  -2  -1  206.61   12.64
  -3  -2   1  206.83   12.59
  -3  -2   1  197.21   12.55
  -3  -2   1  186.51   12.32
  -3  -2   1  218.03   12.54
  -3  -2   1  200.42   12.44
  -3   2   2  590.92   34.71
  -3   2   2  569.94   34.98
   3  -2  -2  542.56   34.64
  -3  -2   2  569.34   34.69
  -3  -2   2  559.34   34.69
  -3  -2   2  513.45   34.63
  -3  -2   2  554.66   34.85
  -3  -2   2  551.53   34.72
  -3   2   3   44.63    2.98
  -3   2   3   46.79    3.25
   3  -2  -3   41.46    2.99
   3  -2  -3   45.75    2.96
   3  -2  -3   48.21    3.25
  -3  -2   3   47.67    2.96
  -3  -2   3   46.52    2.97
  -3  -2   3   40.40    2.99
  -3  -2   3   43.97    3.26
  -3  -2   3   48.14    3.15
  -3   2   4  117.26    7.51
   3  -2  -4  119.25    7.53
   3  -2  -4  120.02    7.51
   3  -2  -4  122.18    7.73
  -3  -2   4  115.69    7.49
  -3  -2   4  116.18    7.50
  -3  -2   4  116.18    7.60
  -3  -2   4  122.48    7.89
  -3   2   5   53.28    3.59
   3  -2  -5   52.20    3.58
   3  -2  -5   55.03    3.61
   3  -2  -5   58.90    4.00
   3   2  -5   52.87    3.63
   3   2  -5   56.29    3.66
  -3  -2   5   59.22    3.79
  -3   2   6  784.10   49.58
  -3   2   6  756.65   49.66
   3  -2  -6  857.60   49.87
   3   2  -6  811.78   49.78
   3   2  -6  793.78   49.78
  -3  -2   6  781.30   49.58
  -3  -2   6  785.81   49.57
  -3  -2   6  790.20   49.68
  -3   2   7  148.79    9.87
  -3   2   7  157.40   10.01
   3  -2  -7  157.98    9.88
   3  -2  -7  160.40    9.90
   3   2  -7  160.67    9.92
   3   2  -7  163.39    9.94
   3   2  -7  159.98   10.22
  -3  -2   7  150.01    9.87
  -3  -2   7  148.10    9.87
  -3  -2   7  153.91    9.99
  -3   2   8  109.17    7.25
  -3   2   8  116.74    7.42
   3  -2  -8  114.85    7.26
   3  -2  -8  121.93    7.27
   3  -2  -8  105.09    7.50
   3   2  -8  114.76    7.29
   3   2  -8  116.42    7.30
  -3  -2   8  110.83    7.24
  -3  -2   8  105.46    7.25
  -3  -2   8  112.27    7.38
  -3   2   9   53.20    3.48
  -3   2   9   51.56    3.75
   3  -2  -9   49.60    3.50
   3  -2  -9   54.44    3.49
   3  -2  -9   46.54    3.98
   3   2  -9   50.91    3.52
   3   2  -9   47.64    3.52
   3   2  -9   57.64    4.04
  -3  -2   9   46.79    3.46
  -3  -2   9   49.94    3.54
  -3  -2   9   50.83    3.71
  -3   2  10   48.17    3.67
   3  -2 -10   54.43    3.46
   3  -2 -10   48.96    3.48
   3  -2 -10   51.02    4.09
   3   2 -10   48.14    3.46
   3   2 -10   46.92    3.48
   3   2 -10   52.00    4.01
  -3  -2  10   48.19    3.40
  -3  -2  10   46.98    3.43
  -3  -2  10   49.65    3.69
  -3   2  11    3.03    1.16
  -3   2  11    3.27    1.81
   3  -2 -11    4.32    1.33
   3  -2 -11    2.81    1.40
   3  -2 -11   -1.72    2.47
   3   2 -11    2.68    1.37
   3   2 -11    3.67    1.50
   3   2 -11    2.18    2.37
  -3  -2  11    2.41    1.23
  -3  -2  11    2.62    1.22
  -3  -2  11    4.99    1.88
  -3   2  12   54.97    4.14
   3  -2 -12   52.85    4.54
   3   2 -12   55.82    4.54
  -3  -2  12   57.42    4.16
  -3   2  13   17.11    2.34
   3  -2 -13   15.27    2.92
   3   2 -13   22.61    2.94
  -3  -2  13   19.57    2.37
   3  -2 -14  155.02   10.36
   3  -2 -15   45.25    3.73
   3   2 -15   37.98    3.69
  -3  -2  15   34.17    3.17
  -3   2  16   60.04    4.28
   3  -2 -16   54.49    4.57
   3   2 -16   54.04    4.62
  -3  -2  16   52.40    4.14
  -3   2  17   60.29    4.37
   3  -2 -17   55.47    4.58
   3   2 -17   56.01    4.71
  -3  -2  17   50.72    4.18
  -3   2  18    9.13    2.30
  -3  -2  18    8.63    2.19
  -3   2  19    3.41    2.22
   3  -2 -19    1.34    2.89
   3   2 -19    2.62    2.85
  -3  -2  19    2.73    2.15
  -3   2  20   27.22    2.94
   3  -2 -20   28.95    3.47
   3   2 -20   20.57    3.40
  -3  -2  20   25.70    2.83
  -3   2  21   -4.86    2.28
   3  -2 -21    0.73    2.86
   3   2 -21    1.92    2.79
  -3  -2  21   -3.45    2.21
   3  -3  -1   53.98    3.55
   3  -3  -1   58.98    3.70
   3   3  -1   54.61    3.64
  -3  -3   1   47.97    3.54
  -3  -3   1   55.86    3.78
  -3  -3   1   57.97    3.62
   3  -3  -2   42.97    2.98
   3  -3  -2   52.60    3.20
  -3  -3   2   43.40    3.00
  -3  -3   2   46.78    3.03
  -3  -3   2   41.74    3.02
  -3  -3   2   49.37    3.29
  -3   3   3   80.55    5.48
   3  -3  -3   74.33    5.26
   3  -3  -3   87.51    5.43
  -3  -3   3   89.87    5.29
  -3  -3   3   86.92    5.29
  -3  -3   3   74.99    5.29
  -3  -3   3   83.35    5.37
  -3   3   4  301.74   18.88
  -3   3   4  300.16   19.02
   3  -3  -4  298.80   18.87
   3  -3  -4  292.05   18.99
  -3  -3   4  293.43   18.92
  -3  -3   4  303.97   19.21
  -3  -3   4  310.63   18.96
  -3   3   5    2.74    0.98
  -3   3   5    5.66    1.52
   3  -3  -5    3.17    1.65
  -3  -3   5    3.17    0.94
  -3  -3   5    2.92    0.99
  -3  -3   5    4.26    1.55
  -3  -3   5    4.04    1.38
  -3   3   6  104.07    6.93
  -3   3   6  116.98    7.13
   3  -3  -6  111.65    6.97
   3  -3  -6  113.49    6.96
   3  -3  -6  107.47    7.18
  -3  -3   6  103.92    6.93
  -3  -3   6  104.12    6.94
  -3   3   7   35.89    2.52
  -3   3   7   32.65    2.80
   3  -3  -7   36.77    2.52
   3  -3  -7   32.59    2.55
   3  -3  -7   33.36    3.06
   3   3  -7   34.30    2.55
   3   3  -7   37.76    2.60
  -3  -3   7   36.53    2.52
  -3  -3   7   33.61    2.51
  -3  -3   7   33.51    2.77
  -3   3   8  582.34   36.19
  -3   3   8  555.08   36.25
   3  -3  -8  593.24   36.19
   3  -3  -8  565.37   36.17
   3  -3  -8  625.39   36.45
   3   3  -8  574.24   36.35
   3   3  -8  598.54   36.40
   3   3  -8  581.57   36.73
  -3  -3   8  547.24   36.16
  -3  -3   8  554.10   36.16
  -3  -3   8  594.71   36.25
  -3   3   9   33.86    2.50
  -3   3   9   37.51    2.85
   3  -3  -9   33.40    2.47
   3  -3  -9   34.70    2.55
   3   3  -9   34.08    2.55
   3   3  -9   31.34    2.56
   3   3  -9   34.87    3.12
  -3  -3   9   30.32    2.48
  -3  -3   9   29.15    2.47
  -3  -3   9   36.43    2.78
  -3   3  10  121.56    8.35
  -3   3  10  128.29    8.49
   3  -3 -10  135.08    8.36
   3  -3 -10  136.25    8.39
   3  -3 -10  135.94    8.72
   3   3 -10  121.91    8.38
   3   3 -10  127.16    8.42
   3   3 -10  136.84    8.73
  -3  -3  10  132.41    8.49
  -3   3  11   13.39    1.66
  -3   3  11   12.77    2.07
   3  -3 -11    8.89    2.69
   3   3 -11   12.41    2.59
  -3  -3  11   14.57    1.59
  -3  -3  11   12.59    1.72
  -3  -3  11   14.19    2.07
  -3   3  12   34.08    2.95
   3  -3 -12   34.06    3.30
   3   3 -12   32.18    3.36
  -3  -3  12   29.34    2.89
   3  -3 -13    1.92    2.43
   3   3 -13    0.61    2.55
  -3  -3  13    1.01    1.97
  -3   3  14    6.12    2.05
   3  -3 -14    6.36    2.63
   3   3 -14    4.14    2.57
  -3  -3  14    7.20    1.95
  -3   3  15    7.16    2.15
   3  -3 -15    3.62    2.50
   3   3 -15    6.91    2.61
  -3  -3  15    6.28    1.98
  -3   3  16   24.09    2.71
   3  -3 -16   22.74    3.17
  -3  -3  16   24.80    2.64
  -3   3  17   11.01    2.27
   3  -3 -17   10.71    2.72
   3   3 -17   12.23    3.15
  -3   3  18  115.61    7.65
   3  -3 -18  106.51    7.88
   3   3 -18  121.48    8.04
  -3  -3  18  110.82    7.61
  -3   3  19    1.34    2.13
   3  -3 -19    0.16    2.70
   3   3 -19    1.18    2.78
  -3  -3  19    0.99    1.97
   3   3 -20   34.37    3.70
  -3  -3  20   32.15    3.10
  -3   3  21   16.96    2.50
   3  -3 -21   15.74    2.93
   3   3 -21   13.05    3.01
  -3  -3  21   14.11    2.47
  -3   4   1  496.28   29.47
   3  -4  -1  476.26   29.33
   3   4  -1  484.84   29.51
  -3  -4   1  440.60   29.31
  -3  -4   1  455.52   29.29
  -3   4   2  285.48   17.32
  -3  -4   2  282.80   17.68
  -3  -4   2  263.57   17.60
  -3  -4   2  258.75   17.28
  -3  -4   2  290.22   17.45
  -3  -4   2  272.95   17.28
  -3   4   3   13.40    1.33
  -3   4   3   11.26    1.66
   3  -4  -3   13.04    1.59
  -3  -4   3   13.46    1.29
  -3  -4   3   12.24    1.30
  -3  -4   3   12.69    1.74
  -3  -4   3   13.15    1.50
  -3   4   4  585.29   36.69
  -3   4   4  590.57   36.94
   3  -4  -4  580.80   36.67
   3  -4  -4  620.24   36.82
  -3  -4   4  580.03   36.71
  -3  -4   4  572.32   36.70
  -3  -4   4  581.88   36.73
  -3  -4   4  564.85   36.98
  -3  -4   4  587.95   36.72
  -3   4   5   35.32    2.64
  -3   4   5   36.98    2.92
   3  -4  -5   38.34    2.61
   3  -4  -5   40.04    3.00
  -3  -4   5   38.13    2.62
  -3  -4   5   36.75    2.63
  -3  -4   5   34.14    2.71
  -3  -4   5   38.48    2.97
  -3  -4   5   37.63    2.80
  -3   4   6  802.10   50.11
  -3   4   6  826.25   50.25
   3  -4  -6  820.62   50.71
   3  -4  -6  837.64   50.09
   3  -4  -6  837.94   50.25
  -3  -4   6  768.43   50.08
  -3  -4   6  742.24   50.06
  -3  -4   6  789.53   50.37
  -3  -4   6  797.95   50.09
  -3   4   7  188.48   11.64
  -3   4   7  190.74   11.79
   3  -4  -7  186.97   11.70
   3  -4  -7  181.15   11.63
   3  -4  -7  193.83   11.85
  -3  -4   7  172.67   11.62
  -3  -4   7  179.07   11.64
  -3  -4   7  179.86   11.85
  -3  -4   7  181.54   11.71
  -3   4   8  800.58   49.66
  -3   4   8  775.71   49.83
   3  -4  -8  814.64   49.77
   3  -4  -8  839.50   49.69
   3  -4  -8  800.94   49.83
  -3  -4   8  758.91   49.64
  -3  -4   8  758.95   49.64
  -3   4   9  322.90   20.89
   3  -4  -9  345.28   20.80
   3  -4  -9  326.07   20.79
   3  -4  -9  341.15   21.01
   3   4  -9  313.60   21.02
   3   4  -9  310.35   21.02
   3   4  -9  356.37   21.22
  -3  -4   9  324.63   20.87
  -3   4  10    3.60    1.38
   3  -4 -10    6.72    2.44
   3   4 -10    5.56    1.47
   3   4 -10    5.74    1.59
   3   4 -10    5.03    2.24
  -3  -4  10    5.06    1.37
  -3  -4  10    4.85    1.40
  -3  -4  10    4.05    1.87
  -3   4  11    4.84    1.87
   3   4 -11    3.14    2.40
  -3  -4  11    3.55    1.90
  -3   4  12  162.75   11.00
   3   4 -12  169.61   11.22
  -3  -4  12  176.28   11.00
  -3   4  13    0.46    2.05
   3   4 -13    2.25    2.59
  -3   4  14   93.64    6.56
   3  -4 -14   98.99    6.85
  -3  -4  14   96.55    6.54
  -3   4  15   15.60    2.39
   3  -4 -15   18.58    3.01
   3   4 -15   14.86    2.95
  -3  -4  15   18.27    2.34
  -3   4  16  110.27    7.42
   3  -4 -16  110.63    7.69
   3   4 -16  105.63    7.67
  -3  -4  16  110.87    7.40
  -3   4  17   31.65    3.04
   3  -4 -17   33.56    3.47
   3   4 -17   29.81    3.52
  -3  -4  17   30.86    3.00
   3  -4 -18    1.32    2.61
   3   4 -18    3.18    2.85
  -3  -4  18    5.09    2.05
  -3   4  19   23.55    2.60
   3  -4 -19   13.56    2.84
   3   4 -19   11.00    3.15
  -3   4  20   39.29    3.44
   3  -4 -20   36.09    3.76
   3   4 -20   40.44    3.94
  -3  -4  20   34.75    3.29
  -3   4  21    0.55    2.24
   3   4 -21    0.92    2.84
  -3   5   1    2.23    1.17
   3  -5  -1    1.74    1.05
   3  -5  -1    1.27    1.08
   3  -5  -1    2.38    1.55
   3   5  -1    1.59    1.43
  -3  -5   1    0.49    1.02
  -3  -5   1    2.15    1.64
  -3  -5   1    1.26    0.86
  -3   5   2    4.38    1.17
   3  -5  -2    5.57    1.08
   3  -5  -2    4.40    1.26
   3   5  -2    5.00    1.46
  -3  -5   2    5.74    1.15
  -3  -5   2    6.59    1.52
  -3   5   3  538.33   31.99
   3  -5  -3  495.43   31.95
   3  -5  -3  500.82   32.02
  -3  -5   3  503.64   32.12
  -3  -5   3  536.45   32.19
  -3  -5   3  502.97   32.00
  -3  -5   3  471.98   32.07
  -3  -5   3  517.56   31.96
  -3   5   4   39.90    2.73
  -3   5   4   43.45    3.00
   3  -5  -4   35.63    2.71
  -3  -5   4   38.60    2.71
  -3  -5   4   37.64    2.74
  -3  -5   4   35.87    2.78
  -3  -5   4   33.91    3.00
  -3  -5   4   38.57    2.82
  -3   5   5   42.38    2.80
  -3   5   5   39.82    3.04
   3  -5  -5   36.29    2.70
   3  -5  -5   39.13    3.17
  -3  -5   5   39.78    2.75
  -3  -5   5   38.99    2.76
  -3  -5   5   37.06    2.86
  -3  -5   5   33.34    3.03
  -3  -5   5   36.22    2.88
  -3   5   6  309.07   18.91
  -3   5   6  317.54   19.09
   3  -5  -6  297.49   18.89
   3  -5  -6  294.73   19.05
  -3  -5   6  283.61   18.89
  -3  -5   6  300.31   18.91
  -3  -5   6  288.64   19.56
  -3  -5   6  303.17   18.96
  -3   5   7  236.48   14.86
   3  -5  -7  232.01   14.89
   3  -5  -7  239.04   14.74
   3  -5  -7  236.69   14.93
  -3  -5   7  215.33   14.72
  -3  -5   7  227.94   14.75
  -3  -5   7  239.23   14.91
  -3  -5   7  240.43   14.82
  -3   5   8 1643.72  101.64
   3  -5  -8 1650.74  102.14
   3  -5  -8 1656.25  101.64
   3  -5  -8 1587.26  101.74
  -3  -5   8 1570.69  101.61
  -3   5   9   15.55    1.66
  -3   5   9   13.87    2.24
   3  -5  -9   11.04    2.52
   3   5  -9   12.89    2.29
  -3  -5   9   12.71    1.57
  -3  -5   9   14.25    1.72
  -3  -5   9   13.40    1.77
  -3  -5   9   12.87    2.07
  -3   5  10   45.14    3.59
   3  -5 -10   47.11    3.88
   3   5 -10   42.46    3.84
  -3  -5  10   45.13    3.54
  -3   5  11   67.37    4.91
   3  -5 -11   69.22    5.13
   3   5 -11   69.25    5.23
  -3   5  12    5.76    2.11
   3  -5 -12    5.62    2.76
  -3  -5  12    5.26    2.03
   3  -5 -13   76.96    5.79
  -3  -5  13   78.18    5.46
  -3   5  14    5.78    2.15
   3   5 -14    9.54    2.61
  -3  -5  14   10.29    2.14
  -3   5  15    2.95    2.16
   3  -5 -15    4.21    2.65
   3   5 -15    7.38    2.78
  -3  -5  15    4.08    1.97
  -3   5  16  131.21    8.64
   3  -5 -16  134.62    8.82
   3   5 -16  115.53    8.85
  -3  -5  16  134.19    8.64
  -3   5  17    0.68    2.13
   3  -5 -17    0.58    2.52
   3   5 -17    3.83    2.76
  -3  -5  17    2.64    2.06
  -3   5  18   73.10    5.38
   3  -5 -18   79.65    5.60
   3   5 -18   77.90    5.77
  -3  -5  18   70.40    5.34
  -3   5  19    3.78    2.22
   3  -5 -19    1.46    2.63
  -3  -5  19    1.14    2.08
  -3   5  20    7.18    2.34
   3  -5 -20    7.32    2.71
   3   5 -20    7.13    3.04
  -3  -5  20    4.58    2.12
  -3   6   1   15.11    1.60
   3  -6  -1   13.12    1.53
   3  -6  -1   13.44    1.48
   3  -6  -1   17.08    2.06
   3   6  -1   16.79    1.97
  -3  -6   1   15.14    1.53
  -3  -6   1   15.14    2.02
  -3  -6   1   13.56    1.27
  -3   6   2    1.08    1.23
   3  -6  -2    0.73    1.19
   3   6  -2    2.25    1.74
  -3  -6   2    0.61    1.14
  -3  -6   2    0.65    1.60
  -3   6   3  101.79    6.34
   3  -6  -3   92.86    6.28
   3  -6  -3   95.33    6.35
  -3  -6   3   99.65    6.36
  -3  -6   3  100.60    6.36
  -3  -6   3   92.14    6.33
  -3  -6   3   93.37    6.44
  -3  -6   3   96.53    6.26
  -3   6   4  742.93   43.62
   3  -6  -4  688.34   43.58
   3  -6  -4  686.39   43.63
  -3  -6   4  704.20   43.73
  -3  -6   4  676.80   43.72
  -3  -6   4  674.57   43.64
  -3  -6   4  680.66   43.80
  -3   6   5  141.62    8.52
   3  -6  -5  120.70    8.22
   3  -6  -5  130.33    8.39
  -3  -6   5  130.63    8.26
  -3  -6   5  130.77    8.28
  -3  -6   5  121.84    8.31
  -3  -6   5  126.70    8.45
  -3  -6   5  126.46    8.29
  -3   6   6  248.60   15.08
   3  -6  -6  234.16   15.04
  -3  -6   6  241.08   15.08
  -3  -6   6  232.61   15.06
  -3  -6   6  228.74   15.41
  -3  -6   6  234.89   15.10
  -3   6   7   25.09    2.18
  -3   6   7   23.43    2.47
   3  -6  -7   24.72    2.11
   3  -6  -7   26.95    2.75
  -3  -6   7   25.64    2.35
  -3  -6   7   22.76    2.45
  -3   6   8   63.19    4.46
  -3   6   8   64.72    4.67
   3  -6  -8   67.10    4.45
   3  -6  -8   64.28    4.46
   3  -6  -8   77.90    4.89
  -3  -6   8   65.61    4.44
  -3  -6   8   62.27    4.45
  -3  -6   8   57.50    4.60
  -3  -6   8   66.23    4.61
  -3   6   9   73.22    5.15
   3  -6  -9   73.28    5.34
  -3  -6   9   73.52    5.13
  -3   6  10   18.82    2.39
   3  -6 -10   16.58    2.78
  -3  -6  10   20.52    2.41
  -3  -6  10   19.76    2.37
  -3   6  11   40.94    3.57
   3  -6 -11   43.11    3.82
   3   6 -11   46.42    3.95
  -3  -6  11   43.42    3.56
  -3   6  12  211.53   13.33
   3   6 -12  198.37   13.48
  -3   6  13   29.44    3.04
   3  -6 -13   36.26    3.44
   3   6 -13   25.38    3.24
   3  -6 -14   27.44    3.12
   3   6 -14   23.68    3.24
  -3   6  15    5.01    2.32
   3  -6 -15    7.67    2.64
   3   6 -15   10.02    2.81
  -3  -6  15    6.52    2.09
  -3   6  16   15.90    2.58
   3  -6 -16   19.52    2.81
   3   6 -16   11.78    3.11
  -3  -6  16   18.85    2.47
  -3   6  17   40.53    3.61
  -3  -6  17   41.34    3.49
  -3   6  18   -4.98    2.31
   3   6 -18    2.95    2.86
  -3  -6  18    0.24    2.08
  -3   6  19   19.92    2.71
   3  -6 -19   17.19    2.88
   3   6 -19   18.37    3.24
  -3  -6  19   14.60    2.44
  -3   6  20   21.98    2.95
   3   6 -20   30.69    3.63
  -3   7   1   94.52    5.84
   3  -7  -1   87.00    5.77
   3  -7  -1   79.09    5.65
   3  -7  -1   90.07    6.07
   3   7  -1   87.00    6.02
  -3  -7   1   90.19    5.81
  -3  -7   1   87.70    5.94
  -3  -7   1   89.47    5.61
  -3   7   2  109.09    6.87
   3  -7  -2   98.20    6.80
   3  -7  -2  105.22    6.82
   3  -7  -2  114.81    7.21
   3   7  -2  108.93    7.19
  -3  -7   2   93.84    6.85
  -3  -7   2  101.85    6.95
  -3  -7   2  109.29    6.73
  -3   7   3  331.19   19.92
   3  -7  -3  313.93   19.84
   3  -7  -3  314.72   19.86
  -3  -7   3  314.91   20.10
  -3  -7   3  312.93   20.10
  -3  -7   3  299.07   19.96
  -3  -7   3  310.96   19.81
  -3   7   4    1.36    1.40
   3  -7  -4    1.27    1.33
   3  -7  -4    1.39    1.74
  -3  -7   4    0.62    1.78
  -3  -7   4    1.63    1.48
  -3   7   5    5.47    1.46
   3  -7  -5    3.76    1.95
  -3  -7   5    4.38    1.53
  -3  -7   5    6.10    1.67
  -3   7   6   14.26    1.75
  -3   7   6   14.41    2.10
   3  -7  -6   17.10    1.82
   3  -7  -6   16.22    2.30
  -3  -7   6   16.51    1.79
  -3  -7   6   17.89    1.80
  -3  -7   6   13.68    1.86
  -3  -7   6   15.62    2.26
  -3   7   7    1.20    1.38
  -3   7   7    0.86    1.79
   3  -7  -7    2.47    1.40
   3  -7  -7    3.56    2.07
  -3  -7   7    2.47    1.30
  -3  -7   7   -1.02    1.89
  -3  -7   7    2.15    1.80
  -3   7   8  207.21   12.63
   3  -7  -8  215.06   12.64
  -3  -7   8  155.98   12.48
  -3  -7   8  210.70   12.55
  -3   7   9    1.28    1.89
  -3  -7   9    0.62    1.92
  -3   7  10    2.19    1.95
   3  -7 -10    2.00    2.28
   3   7 -10    2.85    2.37
  -3  -7  10    1.82    1.95
  -3   7  11   35.57    3.15
   3  -7 -11   39.73    3.44
   3   7 -11   31.10    3.50
  -3  -7  11   35.24    3.19
   3  -7 -12   19.89    3.02
   3   7 -12   26.05    3.14
  -3  -7  12   24.43    2.66
  -3   7  13   67.96    5.05
   3  -7 -13   72.73    5.27
   3   7 -13   65.43    5.30
  -3  -7  13   70.26    5.01
  -3   7  14   17.08    2.59
   3  -7 -14   20.17    2.95
   3   7 -14   19.30    2.96
  -3  -7  14   19.08    2.59
  -3   7  15   27.70    3.04
   3  -7 -15   31.26    3.29
  -3  -7  15   30.03    2.98
  -3   7  16   85.99    6.10
   3  -7 -16   81.55    6.22
   3   7 -16   86.03    6.40
  -3  -7  16   88.33    6.04
  -3   7  17    2.18    2.38
   3  -7 -17   -3.84    2.59
   3   7 -17    5.52    2.83
   3  -7 -18   46.67    3.99
   3   7 -18   43.30    4.26
  -3  -7  18   41.89    3.67
  -3   7  19    0.52    2.41
   3  -7 -19    0.59    2.50
   3   7 -19    0.81    2.77
  -3  -7  19   -3.57    2.19
  -3   7  20    2.96    2.45
  -3   8   1    4.39    1.57
   3  -8  -1    4.87    1.57
   3  -8  -1    5.90    1.28
   3  -8  -1    5.92    2.11
   3   8  -1    9.66    2.16
  -3  -8   1    6.55    1.40
  -3  -8   1    4.50    1.92
  -3  -8   1    4.68    0.98
  -3   8   2    5.24    1.58
   3  -8  -2    3.81    1.45
   3  -8  -2    3.19    1.44
   3  -8  -2    0.24    2.10
   3   8  -2    2.24    2.25
  -3  -8   2    5.14    1.30
  -3   8   3  169.87   11.14
   3  -8  -3  178.70   11.13
   3  -8  -3  169.00   11.14
  -3  -8   3  176.48   11.29
  -3  -8   3  178.39   11.29
  -3  -8   3  163.42   11.17
  -3  -8   3  170.05   11.26
  -3  -8   3  180.14   11.07
  -3   8   4   58.86    4.24
   3  -8  -4   56.83    4.13
   3  -8  -4   63.93    4.29
  -3  -8   4   56.38    4.14
  -3  -8   4   55.23    4.17
  -3  -8   4   59.40    4.38
  -3  -8   4   67.24    4.17
   3  -8  -5    1.33    1.94
  -3  -8   5    0.63    2.11
  -3  -8   5    0.47    1.68
   3  -8  -6  182.44   11.70
  -3  -8   6  172.46   11.68
  -3  -8   6  171.21   11.81
  -3  -8   6  194.60   11.66
   3  -8  -7   26.03    2.90
  -3  -8   7   24.63    2.75
  -3  -8   7   32.50    2.70
  -3   8   8    3.54    1.92
   3  -8  -8    7.30    2.33
  -3  -8   8    3.32    2.00
  -3   8   9   10.48    2.13
   3  -8  -9   11.64    2.51
   3  -8 -10   51.94    4.34
   3   8 -10   47.63    4.33
  -3  -8  10   60.53    4.14
   3   8 -11   35.86    3.46
  -3   8  12   24.78    2.74
   3   8 -12   19.44    3.05
  -3  -8  12   27.72    2.74
  -3   8  13    3.98    2.20
   3  -8 -13    1.35    2.46
  -3  -8  13    3.66    2.15
  -3   8  14   41.61    3.66
   3  -8 -14   49.70    3.95
   3   8 -14   36.84    3.97
  -3  -8  14   43.04    3.60
  -3   8  15    2.55    2.29
   3  -8 -15    1.95    2.50
   3   8 -15    6.32    2.85
  -3  -8  15    3.96    2.13
   3  -8 -16   69.11    5.17
   3   8 -16   58.87    5.46
  -3  -8  16   70.38    4.95
  -3   8  17    0.07    2.25
   3  -8 -17    4.22    2.61
   3   8 -17    2.51    3.03
  -3  -8  17    2.47    2.27
  -3   8  18    1.19    2.32
   3  -8 -18   -3.63    2.61
  -3  -8  18    0.47    2.13
  -3   8  19   10.23    2.47
   3   8 -19    7.32    2.93
  -3  -9   1   21.00    2.03
  -3  -9   1   23.60    2.41
  -3  -9   1   16.42    1.51
   3  -9  -2   10.19    1.76
   3  -9  -2    8.40    2.38
  -3  -9   2    8.99    1.67
  -3  -9   2   13.26    2.23
  -3  -9   2   11.47    1.34
   3  -9  -3   11.11    1.92
   3  -9  -3    9.39    2.46
  -3  -9   3   12.29    1.75
  -3  -9   3   10.55    2.17
  -3  -9   3   13.68    1.60
   3  -9  -4    8.36    1.88
   3  -9  -4    5.41    2.18
  -3  -9   4    7.28    2.08
   3  -9  -5   19.97    2.41
   3  -9  -5   17.50    2.46
  -3  -9   5   14.96    2.38
  -3  -9   5   16.90    2.10
  -3  -9   6   24.21    2.82
  -3  -9   6   30.71    2.69
   3  -9  -7   53.50    4.49
  -3  -9   7   58.25    4.58
  -3  -9   7   66.74    4.41
   3  -9  -8   26.50    3.00
  -3  -9   8   27.76    2.77
   3  -9  -9   22.37    3.03
  -3  -9   9   25.79    2.70
  -3   9  10   68.78    5.21
   3   9 -10   73.49    5.37
  -3   9  11    3.91    2.13
   3  -9 -11    3.13    2.47
  -3  -9  11    3.34    2.18
  -3   9  12   -3.79    2.31
   3  -9 -12    1.64    2.54
   3   9 -12   -1.23    2.45
  -3   9  13   53.15    4.41
   3  -9 -13   58.14    4.63
   3   9 -13   56.21    4.63
   3  -9 -14   36.50    3.63
   3   9 -14   38.27    3.78
  -3  -9  14   35.91    3.32
  -3   9  15    2.83    2.41
   3   9 -15    2.57    2.81
  -3  -9  15    5.57    2.18
  -3   9  16   22.11    2.88
   3   9 -16   19.93    3.32
  -3  -9  16   19.45    2.61
  -3   9  17    9.97    2.55
   3  -9 -17   14.77    2.96
   3   9 -17   13.25    3.24
  -3  -9  17   18.05    2.42
   3   9 -18   35.58    3.90
   3 -10  -1  128.71    8.99
  -3 -10   1  136.67    8.84
   3 -10  -2    6.77    2.47
  -3 -10   2    8.64    1.99
   3 -10  -3   36.42    2.99
   3 -10  -3   32.85    3.37
  -3 -10   3   35.78    3.12
  -3 -10   3   37.74    2.78
   3 -10  -4   16.20    2.22
   3 -10  -4   15.80    2.63
  -3 -10   4   13.38    2.36
  -3 -10   4   16.54    1.97
   3 -10  -5    3.17    2.00
   3 -10  -5    1.09    2.26
  -3 -10   5    4.48    2.24
  -3 -10   5    1.59    1.76
   3 -10  -6  400.17   25.90
   3 -10  -6  406.91   26.62
  -3 -10   6  417.39   25.87
   3 -10  -7   -3.45    2.30
  -3 -10   8   67.93    4.93
   3 -10  -9   20.49    2.90
  -3 -10   9   24.80    2.71
   3 -10 -10   19.47    2.91
   3  10 -10   25.75    2.88
  -3 -10  10   23.55    2.68
   3 -10 -11    2.21    2.58
   3  10 -11    2.91    2.43
  -3 -10  11    6.35    2.18
   3 -10 -12    0.17    2.54
   3  10 -12   -5.52    2.60
  -3 -10  12   -3.13    2.24
  -3  10  13   10.29    2.35
   3 -10 -13   14.06    2.85
   3  10 -13   14.39    2.88
  -3 -10  13    7.63    2.35
  -3  10  14   20.47    2.72
   3 -10 -14   18.36    2.98
   3  10 -14   19.10    3.19
  -3 -10  14   26.02    2.72
  -3  10  15   25.82    3.08
   3 -10 -15   31.33    3.48
   3  10 -15   33.39    3.64
  -3 -10  15   33.56    3.11
   3 -10 -16   22.39    3.05
   3  10 -16   25.23    3.46
  -3 -10  16   20.76    2.70
   3 -10 -17    4.32    2.74
   3  10 -17    2.48    2.97
   3 -11  -1    2.83    2.58
  -3 -11   1    1.81    2.08
   3 -11  -2  210.78   13.58
  -3 -11   2  206.06   13.48
   3 -11  -3   51.40    4.02
  -3 -11   3   41.05    3.73
   3 -11  -4   -2.32    2.54
  -3 -11   5  106.84    7.12
  -3 -11   5  100.71    6.87
   3 -11  -6  124.34    8.58
   3 -11  -6  127.04    8.75
  -3 -11   6  129.48    8.71
  -3 -11   6  133.65    8.51
   3 -11  -7    6.35    2.31
   3 -11  -7    5.13    2.45
  -3 -11   7    3.65    2.26
  -3 -11   7    5.76    2.06
   3 -11  -8  136.27    9.70
   3 -11  -8  150.43   10.01
  -3 -11   8  154.42    9.68
   3 -11  -9   -8.61    2.42
   3 -11  -9   -4.94    2.43
  -3 -11   9   -1.32    2.20
   3 -11 -10  101.63    6.87
   3  11 -10   93.13    6.92
   3 -11 -11    7.34    2.63
   3  11 -11    4.40    2.48
  -3 -11  11    3.31    2.26
   3  11 -12    2.10    2.57
  -3 -11  12    1.33    2.24
   3  11 -13  151.42   10.16
  -3 -11  13  148.66    9.90
   3 -11 -14    6.28    2.83
   3  11 -14    7.85    2.82
  -3 -11  14    6.76    2.29
   3 -11 -15   18.89    3.08
   3  11 -15   21.39    3.28
  -3 -11  15   22.94    2.73
   3 -11 -16    4.32    2.71
  -3 -11  16    6.68    2.25
   3 -12  -1   16.47    2.87
  -3 -12   1   14.38    2.55
   3 -12  -3    4.78    2.63
  -3 -12   3    4.08    2.22
   3 -12  -4  109.54    7.76
  -3 -12   4  113.81    7.64
   3 -12  -5    4.53    2.62
  -3 -12   5    4.27    2.15
   3 -12  -6  238.76   15.46
  -3 -12   6  236.24   15.51
   3 -12  -7    1.52    2.60
  -3 -12   7    3.59    2.17
   3 -12  -8   26.64    3.16
  -3 -12   8   26.01    2.83
   3 -12  -9   10.98    2.49
   3 -12  -9   11.72    2.67
  -3 -12   9   14.35    2.44
   3 -12 -10   22.66    3.09
   3 -12 -10   23.99    3.17
  -3 -12  10   31.76    2.95
   3 -12 -11   20.78    2.78
   3 -12 -11   11.86    2.73
   3  12 -11   12.26    2.75
  -3 -12  11   15.60    2.52
   3 -12 -12   42.74    3.71
   3 -12 -12   28.09    3.63
   3  12 -12   37.67    3.73
  -3 -12  12   41.99    3.45
   3 -12 -13    2.50    2.49
   3  12 -13    4.47    2.89
  -3 -12  13    1.67    2.28
   3 -12 -14   34.89    3.49
  -3 -12  14   34.51    3.28
   3 -12 -15   -0.62    2.49
  -3 -12  15    1.70    2.21
   3 -13  -1    5.28    2.73
  -3 -13   1    5.24    2.24
   3 -13  -2   21.48    3.09
  -3 -13   2   17.96    2.66
   3 -13  -3   35.01    3.72
  -3 -13   3   35.68    3.35
   3 -13  -4    7.35    2.81
  -3 -13   4    8.55    2.39
   3 -13  -5    7.02    2.81
  -3 -13   5    9.46    2.28
   3 -13  -7    0.82    2.67
   3 -13  -8   22.28    3.18
   3 -13  -9    1.77    2.64
   3  13 -10   19.36    3.01
   3  13 -11   12.88    2.77
  -3 -13  13   21.35    2.74
  -3 -13  14   -1.89    2.22
   3 -14  -1   54.06    4.64
  -3 -14   1   55.04    4.36
   3 -14  -2    3.91    2.80
  -3 -14   2    7.29    2.43
  -3 -14   3   26.12    3.16
   3 -14  -4    0.91    2.77
  -3 -14   4    2.99    2.35
   3 -14  -5    1.05    2.78
  -3 -14   5    0.00    2.21
   3 -14  -6    1.46    2.75
  -3 -14   6    2.21    2.29
   3 -14  -7   38.81    3.88
   3 -15  -1    2.90    2.67
  -3 -15   1    1.29    2.31
   3 -15  -2    4.91    2.66
  -3 -15   2    0.77    2.32
   3 -15  -3   83.32    6.23
  -3 -15   3   84.76    6.08
   3 -15  -4    0.04    2.78
  -3 -15   4   -2.52    2.25
  -3 -15   5   33.12    3.41
  -3 -16   1   94.16    6.64
  -2   0   1    0.02    1.11
  -2   0   1    0.14    1.11
  -2   0   2   36.31    2.51
  -2   0   2   38.10    2.81
  -2   0   2   35.65    2.72
   2   0  -2   39.23    2.50
   2   0  -2   41.24    2.52
  -2   0   4  383.32   24.87
  -2   0   4  384.75   24.83
  -2   0   4  385.94   24.89
   2   0  -4  408.45   24.84
   2   0  -4  410.36   24.84
   2   0  -4  404.82   25.17
  -2   0   5   -1.35    0.87
  -2   0   5    0.47    0.87
  -2   0   5   -2.51    1.38
   2   0  -5    0.39    1.62
  -2   0   6    7.52    1.09
  -2   0   6    9.58    1.11
   2   0  -6    6.32    1.14
   2   0  -6    7.69    1.16
   2   0  -6    7.09    1.84
  -2   0   7   -0.55    0.99
  -2   0   7   -0.42    1.05
  -2   0   7   -2.73    1.37
   2   0  -7    0.29    1.01
   2   0  -7   -0.24    1.04
   2   0  -7   -2.96    1.85
  -2   0   8  155.49   10.43
  -2   0   8  164.16   10.42
  -2   0   8  160.40   10.49
   2   0  -8  171.90   10.43
   2   0  -8  163.53   10.42
   2   0  -8  167.83   10.63
  -2   0   9   -0.55    1.11
  -2   0   9    0.23    1.16
  -2   0   9    1.02    1.54
   2   0  -9    0.10    1.12
   2   0  -9   -0.25    1.21
  -2   0  10   20.70    1.87
  -2   0  10   19.66    1.91
  -2   0  10   19.67    2.15
   2   0 -10   19.39    2.47
  -2   0  11   -2.73    1.36
  -2   0  11    0.02    1.41
  -2   0  11    0.41    1.71
   2   0 -11    0.57    1.43
   2   0 -11    0.28    1.53
   2   0 -11   -0.15    2.10
  -2   0  12   10.59    1.66
  -2   0  12    5.84    1.64
  -2   0  12    6.11    1.90
   2   0 -12   10.11    1.74
   2   0 -12    6.65    1.76
   2   0 -12    8.17    2.45
  -2   0  13   -1.34    1.85
   2   0 -13    0.71    1.78
   2   0 -13   -1.24    1.76
   2   0 -13   -1.02    2.61
  -2   0  14  215.53   13.84
   2   0 -14  215.10   14.07
  -2   0  15    0.72    1.95
   2   0 -15    1.43    2.53
   2   0 -16  144.45    9.73
  -2   0  17    0.77    1.93
   2   0 -17    1.87    2.70
  -2   0  18   -4.22    2.16
   2   0 -18    1.66    2.59
  -2   0  19   -1.07    2.10
  -2   0  20   19.40    2.56
   2   0 -20   16.78    3.16
  -2   0  21    0.52    2.15
   2   0 -21    1.69    2.82
  -2   0  22   20.92    2.66
   2   0 -22   22.42    3.16
  -2   1   1   65.98    4.15
  -2   1   1   62.77    4.30
   2  -1  -1   59.67    4.12
  -2  -1   1   68.02    4.14
  -2  -1   1   70.71    4.15
  -2  -1   1   62.04    4.12
  -2  -1   1   68.89    4.33
  -2  -1   1   60.31    4.22
  -2   1   2   56.07    3.58
   2  -1  -2   47.31    3.39
   2  -1  -2   47.67    3.36
   2  -1  -2   56.18    3.59
  -2  -1   2   51.76    3.36
  -2  -1   2   52.10    3.36
  -2  -1   2   54.34    3.42
  -2  -1   2   56.71    3.62
  -2  -1   2   55.70    3.47
   2  -1  -3  188.19   12.79
   2  -1  -3  192.89   12.78
   2  -1  -3  216.42   13.00
   2   1  -3  212.96   12.82
   2   1  -3  221.50   12.84
  -2  -1   3  209.24   13.47
  -2  -1   3  197.14   12.86
  -2   1   4    2.10    0.77
  -2   1   4    1.30    1.28
   2  -1  -4    1.98    0.79
   2  -1  -4    1.80    0.92
   2  -1  -4    3.14    1.67
   2   1  -4    2.09    0.84
   2   1  -4    2.94    0.93
  -2  -1   4    1.79    0.88
  -2  -1   4    3.32    0.89
  -2  -1   4    1.35    1.28
  -2   1   5   40.31    2.97
  -2   1   5   48.05    3.18
   2  -1  -5   43.37    2.97
   2  -1  -5   45.69    2.99
   2  -1  -5   46.05    3.37
   2   1  -5   46.11    3.00
   2   1  -5   45.58    3.01
   2   1  -5   43.75    3.30
  -2  -1   5   41.15    2.95
  -2  -1   5   43.58    2.96
  -2  -1   5   41.97    3.12
  -2   1   6  631.41   42.32
  -2   1   6  629.77   41.55
  -2   1   6  635.19   41.60
   2  -1  -6  674.94   41.56
   2  -1  -6  669.75   41.56
   2  -1  -6  716.54   41.82
   2   1  -6  689.51   41.61
   2   1  -6  670.95   41.60
   2   1  -6  674.53   41.94
  -2  -1   6  661.03   41.56
  -2  -1   6  668.83   41.56
  -2  -1   6  644.97   41.60
  -2   1   7  123.20    8.52
  -2   1   7  123.97    8.43
  -2   1   7  130.50    8.50
   2  -1  -7  136.72    8.45
   2  -1  -7  135.81    8.44
   2  -1  -7  142.70    8.68
   2   1  -7  137.24    8.45
   2   1  -7  132.53    8.47
  -2  -1   7  128.31    8.43
  -2  -1   7  134.14    8.45
  -2  -1   7  132.63    8.51
  -2   1   8  700.96   45.16
  -2   1   8  688.18   44.71
  -2   1   8  710.36   44.77
   2  -1  -8  733.94   44.73
   2  -1  -8  707.13   44.70
   2  -1  -8  712.87   44.87
   2   1  -8  722.17   44.75
   2   1  -8  723.56   44.75
   2   1  -8  755.80   44.96
  -2  -1   8  694.89   44.71
  -2  -1   8  705.24   44.71
  -2   1   9    3.79    1.19
  -2   1   9    4.23    1.24
  -2   1   9    2.59    1.56
   2  -1  -9    5.74    1.32
   2  -1  -9    2.22    1.29
   2  -1  -9    2.22    1.94
   2   1  -9    3.78    1.24
   2   1  -9    3.32    1.33
   2   1  -9    3.63    2.06
  -2  -1   9    3.66    1.09
  -2  -1   9    2.82    1.17
  -2  -1   9    2.84    1.55
  -2   1  10  160.36   10.11
  -2   1  10  157.29   10.03
  -2   1  10  151.05   10.07
   2  -1 -10  165.11   10.05
   2  -1 -10  158.32   10.04
   2  -1 -10  162.29   10.26
   2   1 -10  156.42   10.05
   2   1 -10  161.41   10.07
   2   1 -10  165.81   10.30
  -2  -1  10  146.30    9.99
  -2  -1  10  145.43    9.99
  -2  -1  10  155.80   10.08
  -2   1  11   30.86    2.38
  -2   1  11   29.21    2.41
  -2   1  11   25.40    2.54
   2  -1 -11   28.69    2.48
   2  -1 -11   28.48    2.50
   2   1 -11   27.00    2.45
   2   1 -11   27.64    2.53
   2   1 -11   30.45    3.03
  -2  -1  11   28.48    2.38
  -2  -1  11   26.50    2.44
  -2  -1  11   29.63    2.59
  -2   1  12   34.02    2.73
  -2   1  12   36.71    2.79
  -2   1  12   33.75    2.89
   2  -1 -12   37.45    2.85
   2  -1 -12   33.39    2.89
   2   1 -12   33.61    2.82
   2   1 -12   33.57    2.83
   2   1 -12   30.84    3.31
  -2  -1  12   33.13    2.74
  -2  -1  12   32.78    2.77
  -2  -1  12   33.83    2.95
  -2   1  13   -2.78    1.56
  -2   1  13    1.13    1.64
  -2   1  13    1.32    1.82
   2  -1 -13    0.61    1.67
   2  -1 -13    1.82    1.68
   2  -1 -13    0.58    2.65
   2   1 -13    0.75    1.71
   2   1 -13    0.19    1.69
   2   1 -13   -4.83    2.63
  -2  -1  13    0.00    1.87
   2  -1 -14    3.64    2.55
   2   1 -14    3.81    2.61
  -2  -1  14    3.05    1.99
   2  -1 -15   25.66    3.18
  -2  -1  15   26.38    2.62
  -2   1  16  351.76   21.41
   2  -1 -16  326.33   21.50
   2   1 -16  337.84   21.53
  -2  -1  16  326.86   21.35
  -2   1  17   12.27    2.28
   2  -1 -17   11.63    2.87
  -2  -1  17   14.59    2.24
  -2   1  18    2.38    2.08
   2  -1 -18    3.17    2.69
   2   1 -18    2.65    2.73
  -2   1  19    2.16    2.15
   2  -1 -19    4.28    2.88
   2   1 -19    3.60    2.98
  -2  -1  19   -1.34    1.98
  -2   1  20   97.37    6.70
   2  -1 -20  101.07    7.03
   2   1 -20   95.09    7.00
  -2  -1  20   96.14    6.67
   2  -1 -21    0.71    2.63
   2   1 -21   -2.39    2.93
  -2  -1  21    0.80    2.09
  -2   1  22   11.02    2.33
   2   1 -22    8.26    2.96
   2  -2  -1  180.29   12.23
   2  -2  -1  200.24   12.32
   2   2  -1  211.72   12.36
  -2   2   2   33.74    2.51
  -2   2   2   43.16    2.77
   2  -2  -2   34.76    2.50
   2  -2  -2   39.37    2.68
  -2  -2   2   38.14    2.56
  -2   2   3  230.43   15.08
  -2   2   3  235.71   15.19
   2  -2  -3  235.54   15.09
  -2  -2   3  250.45   15.11
  -2  -2   3  250.22   15.11
  -2  -2   3  248.20   15.34
  -2  -2   3  237.49   15.30
  -2  -2   3  229.77   15.11
  -2   2   4   11.93    1.17
  -2   2   4   11.32    1.50
   2  -2  -4    9.87    1.13
   2  -2  -4    8.72    1.15
   2  -2  -4   12.29    1.74
  -2  -2   4   10.95    1.16
  -2  -2   4   12.96    1.21
  -2  -2   4    9.55    1.58
  -2  -2   4    9.75    1.41
  -2   2   5  536.12   34.97
  -2   2   5  554.46   35.06
   2  -2  -5  567.85   35.11
   2  -2  -5  562.19   35.00
   2  -2  -5  558.09   35.10
   2   2  -5  571.29   35.06
   2   2  -5  606.79   35.10
  -2  -2   5  533.49   34.98
  -2  -2   5  546.10   34.98
  -2  -2   5  561.46   35.03
  -2   2   6   15.18    1.48
  -2   2   6   18.01    1.81
   2  -2  -6   18.91    1.54
   2  -2  -6   16.72    1.54
   2  -2  -6   17.38    2.04
   2   2  -6   16.10    1.57
   2   2  -6   16.55    1.62
   2   2  -6   14.53    1.97
  -2  -2   6   17.90    1.54
  -2  -2   6   16.93    1.55
  -2  -2   6   15.52    1.76
  -2   2   7 1140.40   71.46
  -2   2   7 1124.27   71.47
   2  -2  -7 1144.66   71.45
   2  -2  -7 1134.23   71.43
   2  -2  -7 1186.68   71.63
   2   2  -7 1150.31   71.52
   2   2  -7 1202.91   71.55
   2   2  -7 1181.95   72.01
  -2  -2   7 1081.51   71.40
  -2  -2   7 1115.24   71.41
  -2  -2   7 1132.41   71.49
  -2   2   8  352.46   22.41
   2  -2  -8  340.77   22.35
   2  -2  -8  365.18   22.39
   2  -2  -8  355.96   22.55
   2   2  -8  355.61   22.41
   2   2  -8  354.80   22.41
   2   2  -8  365.29   22.59
  -2  -2   8  355.88   22.43
  -2   2   9    1.64    1.29
  -2   2   9    1.72    1.51
   2  -2  -9    3.51    2.14
   2   2  -9    1.70    1.24
   2   2  -9    2.76    1.42
   2   2  -9    2.92    1.92
  -2  -2   9    3.60    1.19
  -2  -2   9    1.60    1.24
  -2  -2   9    1.98    1.52
  -2   2  10  177.22   11.53
  -2   2  10  183.78   11.58
   2  -2 -10  191.27   11.53
   2  -2 -10  187.95   11.53
   2  -2 -10  191.34   11.78
   2   2 -10  169.74   11.54
   2   2 -10  180.86   11.56
   2   2 -10  182.03   11.74
  -2  -2  10  169.69   11.50
  -2  -2  10  176.17   11.52
  -2   2  11    0.69    1.51
  -2   2  11    0.91    1.71
   2  -2 -11    1.24    1.51
   2  -2 -11    0.71    1.58
   2  -2 -11    0.28    2.41
   2   2 -11    0.98    1.54
   2   2 -11    1.66    1.59
   2   2 -11    1.81    2.30
  -2  -2  11    0.51    1.38
  -2  -2  11    1.42    1.52
  -2   2  12   18.17    2.03
   2  -2 -12   17.45    2.04
   2  -2 -12   17.97    2.00
   2  -2 -12   16.16    2.60
   2   2 -12   15.47    2.01
   2   2 -12   14.60    2.00
   2   2 -12   12.25    2.65
  -2  -2  12   14.06    1.86
  -2  -2  12   17.57    2.11
  -2  -2  12   15.81    2.16
  -2   2  13   35.11    2.93
  -2   2  13   34.49    3.05
   2  -2 -13   34.64    2.91
   2  -2 -13   38.93    2.96
   2  -2 -13   34.83    3.44
   2   2 -13   31.25    2.90
   2   2 -13   36.76    2.98
   2   2 -13   32.41    3.49
  -2  -2  13   34.37    2.85
  -2  -2  13   33.49    2.99
  -2  -2  13   35.78    3.08
  -2   2  14  109.04    7.10
   2   2 -14  100.53    7.36
  -2  -2  14  104.71    7.08
   2  -2 -15   58.98    4.59
  -2  -2  15   56.16    4.28
  -2   2  16   67.72    4.76
   2  -2 -16   62.30    5.07
   2   2 -16   68.41    5.27
  -2  -2  16   63.18    4.73
  -2   2  17    2.83    2.18
   2  -2 -17    5.34    2.79
   2   2 -17    1.65    2.91
  -2  -2  17    1.29    2.03
  -2   2  18   31.41    2.80
   2  -2 -18   20.43    3.26
   2   2 -18   23.97    3.26
  -2  -2  18   24.46    2.72
  -2   2  19   -0.91    2.18
   2  -2 -19    0.04    2.65
   2   2 -19    0.09    2.95
  -2  -2  19    0.71    2.07
  -2   2  20   -5.78    2.20
   2  -2 -20   -6.03    2.73
   2   2 -20    2.21    3.01
  -2   2  21    1.67    2.30
   2  -2 -21    1.66    2.64
   2   2 -21    1.76    3.16
  -2  -2  21    2.61    2.09
  -2   2  22   31.72    3.17
   2   2 -22   29.85    3.71
  -2   3   1   14.66    1.29
   2  -3  -1   11.02    1.21
   2   3  -1   11.41    1.38
  -2  -3   1    9.82    1.30
  -2  -3   1   12.93    1.56
  -2  -3   1   10.37    1.12
  -2   3   2  473.59   29.15
  -2   3   2  456.70   29.40
   2  -3  -2  451.97   29.11
   2  -3  -2  463.34   29.19
  -2  -3   2  479.21   29.79
  -2  -3   2  474.61   29.74
  -2  -3   2  451.60   29.14
  -2  -3   2  484.27   29.28
  -2  -3   2  463.74   29.11
  -2   3   3  183.52   11.90
  -2   3   3  184.94   11.99
   2  -3  -3  186.05   11.90
   2  -3  -3  188.93   12.00
  -2  -3   3  186.53   11.93
  -2  -3   3  195.62   11.95
  -2  -3   3  192.21   11.96
  -2  -3   3  188.39   12.03
  -2   3   4 2747.97  174.23
  -2   3   4 2809.68  174.57
   2  -3  -4 2829.34  174.30
   2  -3  -4 2991.53  174.57
  -2  -3   4 2641.58  174.26
  -2  -3   4 2636.31  174.25
  -2  -3   4 2882.96  176.07
  -2  -3   4 2878.08  176.57
  -2  -3   4 2842.27  174.32
  -2   3   5  814.37   52.13
  -2   3   5  820.12   52.24
   2  -3  -5  870.57   53.38
   2  -3  -5  856.30   52.14
   2   3  -5  859.82   53.11
   2   3  -5  841.21   53.03
  -2  -3   5  815.65   52.14
  -2  -3   5  799.50   52.13
  -2  -3   5  866.26   52.20
  -2   3   6 3881.58  240.95
  -2   3   6 3575.97  240.80
   2  -3  -6 3788.23  242.17
   2  -3  -6 3974.58  241.07
   2  -3  -6 4031.49  241.18
   2   3  -6 3943.89  242.18
   2   3  -6 4092.14  242.44
  -2  -3   6 3723.78  240.98
  -2  -3   6 3654.07  240.94
  -2  -3   6 4071.29  241.02
  -2   3   7    4.32    1.39
   2  -3  -7    2.32    1.18
   2  -3  -7    4.44    1.16
   2  -3  -7    4.12    1.84
   2   3  -7    2.98    1.22
   2   3  -7    3.11    1.29
   2   3  -7    2.74    1.68
  -2  -3   7    2.23    1.07
  -2  -3   7    4.42    1.19
  -2  -3   7    5.87    1.46
  -2   3   8   96.83    6.25
  -2   3   8  104.35    6.36
   2  -3  -8   95.61    6.25
   2  -3  -8   93.00    6.26
   2  -3  -8   93.61    6.50
   2   3  -8   92.90    6.28
   2   3  -8   98.98    6.32
   2   3  -8   99.29    6.53
  -2  -3   8   90.19    6.25
  -2  -3   8   94.02    6.25
  -2  -3   8  102.26    6.37
  -2   3   9   13.20    1.63
   2  -3  -9   14.07    1.57
   2  -3  -9   14.71    1.69
   2  -3  -9   11.02    2.19
   2   3  -9   11.76    2.20
  -2  -3   9   14.07    1.64
  -2  -3   9   13.09    1.58
  -2  -3   9   15.01    1.84
  -2   3  10  480.20   31.46
  -2   3  10  503.44   31.52
   2  -3 -10  512.75   31.48
   2  -3 -10  522.63   31.49
   2  -3 -10  540.05   31.66
   2   3 -10  496.32   31.52
   2   3 -10  510.06   31.54
   2   3 -10  521.72   31.70
  -2  -3  10  473.01   31.45
  -2  -3  10  462.34   31.44
  -2  -3  10  507.81   31.53
  -2   3  11  102.64    6.81
  -2   3  11  107.68    6.90
   2  -3 -11  116.42    6.84
   2  -3 -11  107.62    6.87
   2  -3 -11  104.72    7.11
   2   3 -11   95.17    6.85
   2   3 -11  102.89    6.88
   2   3 -11  107.23    7.13
  -2  -3  11   92.61    6.80
  -2  -3  11   98.86    6.84
  -2  -3  11  105.37    6.89
  -2   3  12  651.38   41.15
   2  -3 -12  696.27   41.14
   2  -3 -12  713.02   41.15
   2  -3 -12  649.49   41.30
   2   3 -12  638.25   41.17
   2   3 -12  640.52   41.18
   2   3 -12  679.31   41.38
  -2  -3  12  590.78   41.06
  -2  -3  12  623.04   41.09
  -2  -3  12  681.82   41.21
  -2   3  13    1.18    1.67
  -2   3  13    0.03    1.87
   2  -3 -13    1.67    2.33
  -2  -3  13    0.58    1.54
  -2  -3  13    0.96    1.73
  -2   3  14  406.78   24.85
   2   3 -14  372.86   24.95
   2  -3 -15    0.14    2.51
   2   3 -15   -2.89    2.78
  -2  -3  15   -0.86    2.06
  -2   3  16   75.96    5.37
   2   3 -16   70.10    5.60
  -2  -3  16   76.56    5.32
  -2   3  17   -6.87    2.22
   2  -3 -17   -1.90    2.72
   2   3 -17   -1.07    2.69
  -2  -3  17    1.30    2.00
   2  -3 -18    3.58    2.51
   2   3 -18    5.05    2.76
  -2  -3  18    3.45    2.08
  -2   3  19    0.26    2.22
   2  -3 -19    1.78    2.61
   2   3 -19    0.07    2.83
  -2  -3  19    0.25    2.08
  -2   3  20   65.02    4.80
   2  -3 -20   61.07    5.01
  -2  -3  20   63.31    4.71
  -2   3  21    3.86    2.33
   2  -3 -21    5.84    2.67
   2   3 -21    3.80    2.88
  -2  -3  21    3.55    2.15
  -2   3  22   17.41    2.65
   2   3 -22   22.10    3.45
  -2   4   1    6.27    1.15
   2  -4  -1    3.49    1.00
   2  -4  -1    3.59    1.15
   2   4  -1    2.32    1.32
  -2  -4   1    3.48    1.07
  -2  -4   1    4.32    1.47
  -2  -4   1    4.21    0.84
  -2   4   2    5.36    1.10
   2  -4  -2    2.64    1.05
   2  -4  -2    3.93    1.25
   2   4  -2    3.33    1.42
  -2  -4   2    3.98    1.16
  -2  -4   2    4.22    1.36
  -2  -4   2    4.85    1.03
  -2   4   3  159.44    9.94
  -2   4   3  160.92   10.05
   2  -4  -3  158.74    9.92
  -2  -4   3  149.53    9.96
  -2  -4   3  159.36   10.00
  -2  -4   3  149.17    9.96
  -2  -4   3  154.41   10.00
  -2   4   4  470.84   30.13
  -2   4   4  487.75   30.25
   2  -4  -4  477.45   30.11
   2  -4  -4  481.21   30.21
  -2  -4   4  476.52   30.16
  -2  -4   4  476.14   30.16
  -2  -4   4  483.23   30.23
  -2  -4   4  482.81   30.39
  -2  -4   4  483.14   30.12
  -2   4   5  186.96   11.63
  -2   4   5  185.94   11.68
   2  -4  -5  188.45   11.61
   2  -4  -5  184.88   11.71
  -2  -4   5  177.35   11.62
  -2  -4   5  176.41   11.62
  -2  -4   5  174.18   11.71
  -2  -4   5  191.48   11.99
  -2   4   6   86.88    5.30
   2  -4  -6   77.43    5.24
   2  -4  -6   77.76    5.16
   2  -4  -6   78.43    5.35
  -2  -4   6   73.33    5.17
  -2  -4   6   75.37    5.19
  -2  -4   6   85.96    5.26
  -2   4   7   65.31    4.29
   2  -4  -7   62.95    4.31
   2  -4  -7   64.10    4.31
   2   4  -7   63.25    4.38
   2   4  -7   62.87    4.38
  -2  -4   7   65.34    4.40
  -2   4   8  724.37   43.21
  -2   4   8  652.55   43.17
   2   4  -8  703.03   43.70
  -2  -4   8  670.91   43.18
  -2  -4   8  665.70   43.17
  -2  -4   8  719.78   43.20
  -2   4   9    0.54    1.44
  -2   4   9   -3.56    1.68
   2  -4  -9    0.33    1.41
   2  -4  -9    2.03    1.42
   2  -4  -9    0.12    1.96
   2   4  -9    1.62    1.61
   2   4  -9   -2.98    1.69
   2   4  -9   -2.61    2.06
  -2  -4   9   -1.06    1.33
  -2  -4   9    0.29    1.41
  -2  -4   9    1.89    1.70
  -2   4  10  494.33   31.00
  -2   4  10  492.87   31.04
   2  -4 -10  512.80   31.01
   2  -4 -10  497.14   31.00
   2  -4 -10  532.60   31.20
   2   4 -10  486.95   31.12
   2   4 -10  465.03   31.11
   2   4 -10  524.62   31.26
  -2  -4  10  464.06   30.97
  -2  -4  10  450.11   30.95
  -2  -4  10  523.79   31.05
  -2   4  11   28.48    2.46
  -2   4  11   27.08    2.57
   2  -4 -11   27.98    2.34
   2  -4 -11   24.97    2.55
   2  -4 -11   27.64    2.97
   2   4 -11   24.16    2.49
   2   4 -11   25.45    2.60
  -2  -4  11   24.40    2.42
  -2  -4  11   24.64    2.36
  -2  -4  11   23.81    2.56
  -2   4  12   15.14    2.00
  -2   4  12   13.64    2.16
   2  -4 -12   18.28    1.95
   2  -4 -12   18.70    2.19
   2  -4 -12    9.31    2.54
   2   4 -12   14.47    2.13
   2   4 -12   14.93    2.26
   2   4 -12   15.32    2.81
  -2  -4  12   12.67    2.23
  -2   4  13   37.21    3.05
   2  -4 -13   31.60    3.42
   2   4 -13   32.24    3.58
  -2  -4  13   36.67    3.11
  -2   4  14    4.24    2.02
   2  -4 -14    3.61    2.47
   2   4 -14    5.11    2.60
  -2  -4  14    6.95    2.05
   2  -4 -15    8.05    2.46
   2   4 -15    5.77    2.71
   2  -4 -16   62.98    4.66
   2   4 -16   54.94    4.80
  -2   4  17   20.33    2.64
   2  -4 -17   19.72    2.94
   2   4 -17   24.13    3.31
  -2  -4  17   21.24    2.53
  -2   4  18  192.69   12.45
  -2  -4  18  190.46   12.44
  -2   4  19   -3.46    2.26
   2  -4 -19    1.91    2.50
   2   4 -19    0.66    2.84
  -2  -4  19    4.21    2.10
  -2   4  20    4.46    2.29
   2  -4 -20    5.46    2.70
   2   4 -20    6.40    2.99
  -2  -4  20    5.98    2.20
   2  -4 -21    7.57    2.67
   2   4 -21    4.89    3.06
  -2  -4  21    4.45    2.12
  -2   5   1   11.63    1.46
   2  -5  -1   12.66    1.35
   2  -5  -1   13.97    1.74
   2   5  -1   10.03    1.65
  -2  -5   1   15.30    1.39
  -2  -5   1   10.34    1.61
  -2  -5   1   12.66    1.21
  -2   5   2  647.15   37.56
   2  -5  -2  590.00   37.52
   2  -5  -2  573.26   37.51
   2   5  -2  609.24   37.99
  -2  -5   2  585.21   37.54
  -2  -5   2  606.67   37.60
  -2  -5   2  589.71   37.46
  -2   5   3    1.38    1.14
  -2   5   3    0.79    1.28
   2  -5  -3    2.03    1.13
   2  -5  -3    1.19    1.34
  -2  -5   3    1.75    1.11
  -2  -5   3    2.68    1.11
  -2  -5   3    2.36    1.38
  -2  -5   3    1.46    1.22
   2  -5  -4  278.67   17.28
   2  -5  -4  266.69   17.31
  -2  -5   4  277.40   17.34
  -2  -5   4  264.94   17.34
  -2  -5   4  261.80   17.38
  -2  -5   4  286.91   17.30
  -2   5   5  161.98   10.32
   2  -5  -5  164.36   10.32
   2  -5  -5  160.61   10.39
  -2  -5   5  155.86   10.39
  -2  -5   5  155.59   10.48
  -2  -5   5  168.25   10.35
  -2   5   6  600.32   35.76
  -2   5   6  569.94   35.79
   2  -5  -6  550.91   35.77
  -2  -5   6  550.04   35.73
  -2  -5   6  548.03   35.73
  -2  -5   6  575.19   35.97
  -2  -5   6  584.79   35.74
  -2   5   7   75.79    4.97
  -2   5   7   76.86    5.05
   2  -5  -7   72.25    5.02
   2  -5  -7   71.43    4.94
   2  -5  -7   73.50    5.19
  -2  -5   7   74.54    4.97
  -2  -5   7   74.14    4.99
  -2  -5   7   72.57    5.05
  -2   5   8    4.56    1.47
  -2   5   8    8.35    1.74
   2  -5  -8    8.13    1.47
   2  -5  -8    7.98    1.49
   2  -5  -8    6.31    2.07
  -2  -5   8    6.44    1.54
  -2  -5   8    6.47    1.59
  -2  -5   8    5.30    1.47
  -2  -5   8    8.75    1.81
  -2   5   9    0.21    1.36
  -2   5   9    2.22    1.73
   2  -5  -9    2.02    1.49
   2  -5  -9    0.25    1.52
   2  -5  -9    1.92    2.06
   2   5  -9    2.64    1.53
   2   5  -9   -0.17    1.65
   2   5  -9    0.95    2.23
  -2  -5   9    0.15    1.33
  -2  -5   9    0.55    1.55
  -2  -5   9    1.36    1.80
  -2   5  10  162.16   10.39
  -2   5  10  156.90   10.43
   2  -5 -10  178.46   10.42
   2  -5 -10  165.72   10.40
   2   5 -10  149.55   10.50
   2   5 -10  164.08   10.57
   2   5 -10  163.92   10.64
  -2  -5  10  153.52   10.36
  -2  -5  10  147.43   10.38
  -2  -5  10  172.19   10.46
  -2   5  11    9.99    1.91
  -2   5  11    7.25    2.03
   2  -5 -11    9.34    1.76
   2  -5 -11   10.03    1.99
   2  -5 -11    8.36    2.47
   2   5 -11    8.70    1.79
   2   5 -11   11.00    1.99
   2   5 -11    5.64    2.53
  -2  -5  11   12.77    2.11
  -2   5  12  133.44    8.44
  -2   5  12  123.35    8.46
   2  -5 -12  135.01    8.39
   2  -5 -12  133.38    8.47
   2  -5 -12  126.26    8.66
   2   5 -12  127.52    8.69
  -2  -5  12  119.65    8.40
  -2  -5  12  117.05    8.37
  -2  -5  12  139.19    8.48
  -2   5  13   24.46    2.65
   2   5 -13   21.12    3.09
   2  -5 -14   70.77    5.18
   2   5 -14   66.20    5.32
  -2  -5  14   68.34    4.95
  -2   5  15   96.52    6.34
   2  -5 -15   84.31    6.43
   2   5 -15   90.56    6.61
  -2  -5  15   93.12    6.29
  -2   5  16   18.04    2.54
   2  -5 -16   21.60    2.93
   2   5 -16   13.87    3.12
  -2  -5  16   23.81    2.52
  -2   5  17    4.91    2.25
   2  -5 -17    3.90    2.64
   2   5 -17   10.16    2.86
  -2  -5  17    5.83    2.24
  -2   5  18    3.57    2.25
   2  -5 -18    0.13    2.48
   2   5 -18    0.00    2.81
  -2   5  19    0.84    2.26
   2  -5 -19    2.43    2.52
   2   5 -19    2.13    2.84
  -2  -5  19    1.31    2.20
  -2   5  20   29.33    3.12
   2  -5 -20   28.14    3.40
   2   5 -20   30.07    3.56
  -2  -5  20   31.62    2.98
  -2   5  21    3.39    2.29
  -2   6   1   -3.30    1.33
   2  -6  -1   -2.57    1.14
   2  -6  -1    0.15    1.02
   2  -6  -1    0.55    1.59
  -2  -6   1   -0.37    1.15
  -2  -6   1    0.66    1.39
  -2   6   2   50.55    3.19
   2  -6  -2   43.18    3.09
   2   6  -2   41.08    3.38
  -2  -6   2   40.12    3.13
  -2  -6   2   42.98    3.21
  -2   6   3  118.40    7.14
   2  -6  -3  102.88    7.10
  -2  -6   3  104.00    7.15
  -2  -6   3  113.22    7.09
  -2   6   4   89.32    5.47
   2  -6  -4   78.19    5.49
  -2  -6   4   78.48    5.44
  -2  -6   4   84.94    5.49
  -2  -6   4   79.02    5.48
  -2  -6   4   82.96    5.52
  -2  -6   4   81.63    5.44
  -2   6   5  131.35    8.34
  -2   6   5  128.85    8.47
   2  -6  -5  129.29    8.35
   2  -6  -5  132.96    8.42
  -2  -6   5  126.19    8.35
  -2  -6   5  131.46    8.38
  -2  -6   5  125.48    8.43
  -2  -6   5  126.55    8.47
  -2  -6   5  129.77    8.37
  -2   6   6    0.07    1.43
  -2   6   6    0.09    1.47
   2  -6  -6    0.72    1.30
   2  -6  -6   -0.76    1.78
  -2  -6   6    0.18    1.33
  -2  -6   6    0.90    1.40
  -2  -6   6   -1.85    1.56
  -2  -6   6   -2.50    1.64
  -2  -6   6   -1.39    1.65
  -2   6   7   16.69    1.87
  -2   6   7   15.64    1.93
   2  -6  -7   16.11    1.85
   2  -6  -7   16.23    2.21
  -2  -6   7   15.07    1.82
  -2  -6   7   15.48    1.84
  -2  -6   7   13.75    2.00
  -2  -6   7   17.69    2.11
  -2   6   8  135.96    8.55
  -2   6   8  126.67    8.55
   2  -6  -8  136.58    8.65
   2  -6  -8  130.50    8.50
   2  -6  -8  127.41    8.62
  -2  -6   8  123.76    8.50
  -2  -6   8  126.42    8.51
  -2  -6   8  140.93    8.58
  -2   6   9   32.46    2.62
  -2   6   9   32.85    2.76
   2  -6  -9   29.25    2.57
   2  -6  -9   30.89    2.57
   2  -6  -9   29.29    3.07
   2   6  -9   25.74    3.01
  -2  -6   9   26.38    2.60
  -2  -6   9   33.79    2.63
  -2  -6   9   28.77    2.66
  -2   6  10  127.27    8.03
  -2   6  10  131.07    8.12
   2  -6 -10  119.51    8.03
   2  -6 -10  125.87    8.07
   2  -6 -10  119.58    8.21
   2   6 -10  123.81    8.25
  -2  -6  10  108.09    8.17
  -2   6  11   31.60    2.63
  -2   6  11   30.93    2.89
   2  -6 -11   34.76    2.65
   2  -6 -11   31.75    2.71
   2  -6 -11   31.09    3.25
   2   6 -11   34.12    3.29
  -2  -6  11   25.89    2.58
  -2  -6  11   28.04    2.68
  -2  -6  11   27.64    2.70
  -2  -6  11   26.03    2.84
   2   6 -12   -3.09    2.42
  -2  -6  12   -2.24    2.04
  -2   6  13   47.09    3.69
   2   6 -13   40.22    4.08
  -2  -6  13   45.82    3.62
  -2   6  14    4.52    2.28
   2  -6 -14   10.12    2.50
  -2  -6  14    5.84    2.08
  -2   6  15   10.51    2.38
   2  -6 -15   15.71    2.68
   2   6 -15   13.88    2.95
  -2  -6  15   13.93    2.32
  -2   6  16   36.07    3.38
   2  -6 -16   41.49    3.59
   2   6 -16   39.50    3.87
  -2  -6  16   36.08    3.31
  -2   6  17    0.30    2.22
   2  -6 -17    0.54    2.45
   2   6 -17    2.02    2.94
  -2  -6  17   -1.64    2.10
  -2   6  18   73.37    5.58
   2  -6 -18   81.38    5.79
   2   6 -18   80.77    5.97
  -2  -6  18   77.19    5.54
  -2   6  19   17.87    2.67
   2  -6 -19   19.85    2.84
   2   6 -19   17.65    3.20
  -2  -6  19   16.23    2.60
  -2   6  20    1.84    2.35
   2  -6 -20    2.84    2.50
   2   6 -20    5.67    2.88
  -2  -6  20    2.49    2.19
   2   6 -21   43.90    4.34
  -2   7   1  540.22   32.23
   2  -7  -1  484.58   32.15
   2  -7  -1  524.52   32.11
   2  -7  -1  542.61   32.50
   2   7  -1  551.98   32.41
  -2  -7   1  480.84   32.16
  -2  -7   1  492.51   32.06
  -2   7   2  498.72   29.43
   2  -7  -2  473.99   29.36
   2  -7  -2  461.43   29.29
   2   7  -2  453.63   29.69
  -2  -7   2  454.02   29.39
  -2  -7   2  474.31   29.41
  -2  -7   2  451.58   29.28
  -2   7   3    6.09    1.64
   2  -7  -3    5.44    1.51
   2  -7  -3    6.10    1.60
  -2  -7   3    3.83    1.54
  -2  -7   3    4.02    1.46
  -2  -7   3    3.93    1.50
  -2  -7   3    4.74    1.64
  -2   7   4   37.98    2.81
   2  -7  -4   36.31    2.74
   2  -7  -4   35.88    2.87
  -2  -7   4   32.89    2.75
  -2  -7   4   31.50    2.82
  -2  -7   4   28.48    2.74
  -2  -7   4   35.66    2.93
  -2  -7   4   39.88    2.77
  -2   7   5   -3.80    1.51
   2  -7  -5    1.09    1.53
  -2  -7   5    0.68    1.43
  -2  -7   5    0.72    1.53
  -2  -7   5    0.91    1.57
  -2  -7   5    0.28    1.63
  -2  -7   5    0.30    1.60
  -2   7   6  201.52   12.26
  -2   7   6  200.03   12.51
   2  -7  -6  185.08   12.24
   2  -7  -6  200.17   12.33
  -2  -7   6  179.15   12.25
  -2  -7   6  183.44   12.27
  -2  -7   6  174.40   12.31
  -2  -7   6  201.25   12.54
  -2  -7   6  202.12   12.28
  -2   7   7   20.59    2.07
  -2   7   7   20.79    2.24
   2  -7  -7   20.83    2.17
   2  -7  -7   25.58    2.51
  -2  -7   7   17.89    2.11
  -2  -7   7   20.49    2.15
  -2  -7   7   18.79    2.23
  -2  -7   7   20.17    2.27
  -2   7   8   21.19    2.20
   2  -7  -8   22.86    2.17
   2  -7  -8   20.45    2.52
  -2  -7   8   16.21    2.09
  -2  -7   8   17.81    2.19
  -2  -7   8   17.60    2.23
  -2  -7   8   20.44    2.35
  -2   7   9  211.51   13.35
   2  -7  -9  214.25   13.46
   2   7  -9  199.41   13.63
  -2  -7   9  191.80   13.50
  -2  -7   9  218.91   13.41
  -2   7  10  158.94    9.95
  -2   7  10  150.90    9.97
   2  -7 -10  163.99   10.01
   2  -7 -10  148.53    9.90
   2  -7 -10  149.57   10.07
   2   7 -10  142.93   10.19
  -2  -7  10  140.84   10.11
  -2  -7  10  161.39   10.01
  -2   7  11   31.40    2.97
   2  -7 -11   32.63    3.31
   2   7 -11   31.79    3.28
  -2  -7  11   29.35    2.97
  -2   7  12   51.34    3.81
   2  -7 -12   45.63    3.97
   2   7 -12   43.38    4.14
  -2   7  13   16.58    2.49
   2  -7 -13   16.10    2.71
   2   7 -13   14.63    2.99
   2  -7 -14   29.02    3.25
   2   7 -14   33.53    3.56
  -2  -7  14   33.12    3.04
  -2   7  15   49.92    4.12
   2   7 -15   52.53    4.56
  -2  -7  15   52.09    4.07
   2   7 -16   16.87    3.15
  -2  -7  16   17.71    2.43
  -2   7  17   13.77    2.63
   2  -7 -17   14.99    2.66
   2   7 -17   13.42    3.11
  -2  -7  17   12.25    2.35
  -2   7  18    0.27    2.43
   2  -7 -18    5.41    2.45
  -2  -7  18    3.75    2.18
  -2   7  19    0.84    2.43
   2  -7 -19    0.72    2.40
   2   7 -19   -9.79    3.01
  -2  -7  19   -1.09    2.15
   2   7 -20   45.45    4.32
  -2   8   1  137.33    8.87
   2  -8  -1  134.95    8.80
   2  -8  -1  139.20    8.70
   2  -8  -1  134.34    8.95
   2   8  -1  143.91    9.04
  -2  -8   1  123.92    8.78
  -2  -8   1  143.86    8.87
  -2  -8   1  131.99    8.64
  -2   8   2  356.00   21.61
   2  -8  -2  333.74   21.55
   2  -8  -2  352.98   21.52
   2  -8  -2  365.26   21.83
   2   8  -2  334.56   21.88
  -2  -8   2  342.41   21.59
  -2  -8   2  329.28   21.59
  -2  -8   2  323.64   21.45
  -2   8   3    0.00    1.70
   2  -8  -3   -2.03    1.61
   2  -8  -3   -3.31    1.60
   2  -8  -3    5.11    1.96
  -2  -8   3    1.22    1.57
  -2  -8   3    0.11    1.55
  -2  -8   3    0.95    1.56
  -2  -8   3    0.13    1.42
  -2   8   4  403.69   23.62
   2  -8  -4  385.01   23.57
   2  -8  -4  374.01   23.57
   2  -8  -4  364.24   24.66
  -2  -8   4  361.94   23.69
  -2  -8   4  367.21   23.72
  -2  -8   4  335.15   23.59
  -2  -8   4  382.43   23.55
   2  -8  -5  254.94   15.73
   2  -8  -5  261.30   15.80
  -2  -8   5  264.45   15.80
  -2  -8   5  237.92   15.79
  -2  -8   5  223.19   15.78
  -2  -8   5  237.12   15.86
   2  -8  -6   53.23    4.00
   2  -8  -6   62.10    4.21
  -2  -8   6   58.50    4.08
  -2  -8   6   58.39    4.08
  -2  -8   6   49.36    4.09
  -2  -8   6   51.84    4.18
  -2  -8   6   58.35    4.10
  -2   8   7    1.67    1.63
   2  -8  -7    0.50    1.67
  -2  -8   7    0.59    1.74
  -2  -8   7    0.94    1.91
  -2   8   8   51.00    3.59
  -2   8   8   44.08    3.59
   2  -8  -8   45.45    3.65
   2  -8  -8   48.69    3.82
  -2  -8   8   44.86    3.58
  -2  -8   8   45.18    3.61
  -2  -8   8   51.45    3.76
  -2  -8   8   47.36    3.68
  -2   8   9    0.31    1.92
  -2   8   9    1.81    1.90
   2  -8  -9   -2.48    1.62
   2  -8  -9    1.17    1.74
   2  -8  -9    0.66    2.25
  -2  -8   9    0.78    2.03
  -2   8  10  138.27    9.23
   2  -8 -10  142.84    9.34
  -2  -8  10  139.97    9.23
  -2   8  11    0.75    1.99
   2   8 -11    1.12    2.59
  -2   8  12    9.38    2.14
   2  -8 -12    8.70    2.58
   2   8 -12    6.75    2.67
  -2  -8  12    8.28    2.22
  -2   8  13   14.23    2.42
   2  -8 -13   19.37    2.76
   2   8 -13   14.21    2.84
  -2  -8  13   19.39    2.51
   2  -8 -14   51.63    4.19
   2   8 -14   49.47    4.34
  -2  -8  14   48.41    3.96
  -2   8  15    0.73    2.22
   2  -8 -15    1.20    2.37
   2   8 -15    1.04    2.83
  -2   8  16   13.24    2.54
   2  -8 -16   15.67    2.65
  -2   8  17    2.02    2.30
   2  -8 -17    1.39    2.37
   2   8 -17    1.64    2.83
  -2  -8  17    1.64    2.11
   2  -8 -18   20.09    2.83
   2   8 -18   15.95    3.17
  -2  -8  18   20.46    2.58
   2   8 -19    2.42    2.97
  -2   9   1  417.81   24.49
   2  -9  -1  386.58   24.35
   2  -9  -1  382.01   24.28
   2  -9  -1  386.56   24.48
   2   9  -1  393.74   24.62
  -2  -9   1  363.87   24.37
  -2  -9   1  372.27   24.37
  -2   9   2  108.17    6.81
   2  -9  -2  104.14    6.78
   2  -9  -2  107.11    6.93
   2   9  -2   98.54    7.16
  -2  -9   2   90.90    6.78
  -2  -9   2  104.67    6.84
  -2  -9   2   99.55    6.62
  -2   9   3   -1.15    1.99
   2  -9  -3    1.13    1.75
   2  -9  -3    1.67    1.78
   2  -9  -3    1.44    2.01
  -2  -9   3    0.73    1.56
  -2  -9   3    1.05    1.84
  -2  -9   3    0.00    1.60
  -2   9   4   84.85    5.48
   2  -9  -4   79.36    5.41
   2  -9  -4   80.17    5.60
  -2  -9   4   77.19    5.45
  -2  -9   4   71.01    5.42
  -2  -9   4   79.38    5.38
  -2   9   5    6.54    2.10
   2  -9  -5    8.09    2.03
   2  -9  -5    4.81    2.11
  -2  -9   5    8.61    1.77
  -2  -9   5    7.02    1.97
  -2  -9   5    8.17    1.91
  -2  -9   5    6.69    2.07
  -2  -9   5    9.85    1.96
  -2   9   6  249.47   15.03
   2  -9  -6  239.92   14.98
   2  -9  -6  237.57   15.05
  -2  -9   6  241.07   15.03
  -2  -9   6  234.61   15.02
  -2  -9   6  212.92   15.06
  -2  -9   6  223.60   14.98
  -2   9   7   20.88    2.20
   2  -9  -7   16.22    2.15
   2  -9  -7   16.14    2.54
  -2  -9   7   15.72    2.33
  -2  -9   7   17.34    2.35
   2  -9  -8   18.68    2.62
   2  -9  -9   46.81    3.82
  -2  -9   9   43.49    3.69
  -2   9  10   68.34    4.87
   2   9 -10   61.31    5.06
  -2  -9  10   69.63    4.93
  -2   9  11  144.65   10.08
   2  -9 -11  164.36   10.16
   2   9 -11  134.59   10.21
  -2  -9  11  167.88   10.09
  -2   9  12   50.60    4.18
   2  -9 -12   59.44    4.46
  -2  -9  12   54.17    4.26
  -2   9  13   96.49    7.22
   2  -9 -13  118.37    7.37
   2   9 -13  101.15    7.43
  -2  -9  13  108.11    7.19
  -2   9  14   36.96    3.47
   2  -9 -14   31.59    3.56
  -2  -9  14   42.64    3.39
  -2   9  15    1.21    2.25
   2  -9 -15    1.55    2.50
   2   9 -15    2.93    2.91
  -2  -9  15    1.06    2.18
   2  -9 -16    6.18    2.56
   2   9 -16    4.19    2.85
  -2  -9  16    6.21    2.29
   2  -9 -17    0.99    2.42
   2   9 -17    2.85    2.87
  -2  -9  17    0.14    2.20
   2  -9 -18    8.02    2.61
  -2  -9  18    7.17    2.22
  -2  10   1    4.76    1.94
   2 -10  -1    4.25    1.94
   2 -10  -1    4.07    1.67
   2 -10  -1    4.04    2.36
  -2 -10   1    1.52    1.55
  -2 -10   1    3.51    1.99
  -2 -10   1    3.50    1.26
  -2  10   2   36.72    3.23
   2 -10  -2   32.67    2.99
   2 -10  -2   37.79    2.93
   2 -10  -2   35.48    3.38
  -2 -10   2   36.50    2.93
  -2 -10   2   31.30    3.07
  -2 -10   2   36.03    2.79
  -2  10   3   21.30    2.33
   2 -10  -3   18.88    2.23
   2 -10  -3   22.27    2.37
   2 -10  -3   19.51    2.77
  -2 -10   4   -2.01    1.86
   2 -10  -5   27.02    2.66
   2 -10  -5   23.81    2.82
  -2 -10   5   19.97    2.66
  -2 -10   5   23.15    2.53
   2 -10  -6   34.79    3.23
   2 -10  -6   39.66    3.36
  -2 -10   6   37.33    3.27
  -2 -10   6   34.11    3.19
   2 -10  -7   23.25    2.75
   2 -10  -7   18.68    2.76
  -2 -10   7   26.25    2.73
  -2 -10   7   26.87    2.72
   2 -10  -8  214.08   14.20
  -2 -10   8  225.17   14.18
   2 -10  -9    1.49    2.41
  -2 -10   9    2.92    2.22
   2 -10 -10   87.62    5.94
   2  10 -10   73.21    5.90
  -2 -10  10   82.43    5.74
   2 -10 -11   38.02    3.57
   2  10 -11   34.01    3.55
   2 -10 -12    1.62    2.56
  -2 -10  12    2.85    2.30
  -2  10  13    2.42    2.15
   2  10 -13    3.01    2.68
  -2 -10  13    3.49    2.20
   2  10 -14    2.90    2.76
  -2 -10  14    0.46    2.20
   2 -10 -15    4.56    2.75
   2  10 -15    2.59    2.93
  -2 -10  15    1.36    2.24
   2 -10 -16   19.02    3.08
  -2 -10  16   24.91    2.76
   2 -10 -17    3.70    2.73
  -2 -10  17    4.13    2.29
  -2 -11   1   43.31    3.15
   2 -11  -2  199.45   12.70
   2 -11  -2  215.83   12.96
  -2 -11   2  208.71   12.80
  -2 -11   2  180.90   12.61
   2 -11  -3  110.46    7.04
   2 -11  -3  116.91    7.32
  -2 -11   3   96.67    7.05
  -2 -11   3  100.43    6.95
   2 -11  -4  223.86   13.24
   2 -11  -4  216.61   13.40
  -2 -11   4  195.10   13.28
  -2 -11   4  190.98   13.14
   2 -11  -5    3.30    2.16
   2 -11  -5    0.23    2.31
  -2 -11   5   -1.68    2.14
  -2 -11   5    1.51    1.93
   2 -11  -6   62.69    4.66
   2 -11  -6   63.82    4.73
  -2 -11   6   62.69    4.72
  -2 -11   6   56.87    4.56
   2 -11  -7    1.06    2.38
  -2 -11   7    3.69    2.16
  -2 -11   8   47.52    3.88
   2 -11  -9    3.10    2.26
   2 -11  -9    0.66    2.33
  -2 -11   9    1.90    2.21
   2 -11 -10   32.22    3.48
  -2 -11  10   39.18    3.37
   2 -11 -11   91.31    6.52
   2  11 -11   93.81    6.65
  -2 -11  11   91.90    6.44
   2 -11 -12  150.08    9.36
   2  11 -12  125.11    9.42
  -2 -11  12  140.67    9.26
   2 -11 -13   46.56    3.92
   2  11 -13   38.19    3.98
  -2 -11  13   41.09    3.67
   2 -11 -14   22.61    3.05
  -2 -11  14   18.10    2.67
   2 -11 -15   14.26    2.81
   2 -11 -16   28.73    3.27
  -2 -12   1    5.89    2.19
   2 -12  -2   29.02    3.35
   2 -12  -3   34.09    3.59
   2 -12  -4    2.49    2.07
   2 -12  -4    0.34    2.58
  -2 -12   4    2.78    1.90
   2 -12  -5   26.42    2.80
   2 -12  -5   23.75    3.12
  -2 -12   5   20.68    2.59
   2 -12  -6   33.52    3.10
  -2 -12   6   26.26    2.95
   2 -12  -7    7.82    2.51
  -2 -12   7    9.35    2.39
   2 -12  -8  113.27    7.71
  -2 -12   8  112.86    7.66
   2 -12  -9   29.96    3.01
   2 -12  -9   24.96    3.14
   2 -12 -10    3.95    2.40
   2  12 -10    6.78    2.57
  -2 -12  10    6.09    2.33
   2  12 -11   42.91    4.16
  -2 -12  11   50.84    3.98
   2 -12 -12    0.36    2.42
  -2 -12  12    0.43    2.30
   2 -12 -13    5.12    2.52
  -2 -12  13    6.14    2.37
   2 -12 -14    0.56    2.56
  -2 -12  14    0.92    2.29
   2 -12 -15    2.83    2.43
  -2 -12  15    2.61    2.31
   2 -13  -1  147.30    9.81
  -2 -13   1  145.19    9.68
   2 -13  -2   46.93    4.27
  -2 -13   2   51.55    4.01
   2 -13  -4  177.89   11.40
  -2 -13   4  166.34   11.28
   2 -13  -5    5.78    2.74
  -2 -13   5    9.61    2.26
   2 -13  -6   36.17    3.62
  -2 -13   6   33.67    3.33
   2 -13  -7   32.84    3.51
  -2 -13   7   32.45    3.15
   2 -13  -8   31.33    3.28
  -2 -13   8   29.23    3.09
   2 -13  -9  109.17    7.22
   2  13  -9   94.71    7.29
  -2 -13   9  106.91    7.15
   2 -13 -10   18.80    2.79
  -2 -13  10   18.37    2.71
   2 -13 -11   80.06    5.66
  -2 -13  11   73.95    5.58
   2 -13 -12  136.51    9.01
  -2 -13  12  131.43    8.95
   2 -13 -13    7.47    2.45
  -2 -13  13    7.55    2.43
   2 -13 -14   16.37    2.70
  -2 -13  14   19.21    2.68
   2 -14  -1    0.84    2.55
  -2 -14   1    2.57    2.29
   2 -14  -2    4.79    2.67
  -2 -14   2    9.58    2.35
   2 -14  -3    1.70    2.71
  -2 -14   3    2.78    2.29
   2 -14  -4    7.38    2.83
  -2 -14   4   12.48    2.50
  -2 -14   5    3.53    2.24
  -2 -14  12   28.00    3.07
   2 -15  -1   32.45    3.63
  -2 -15   1   35.02    3.32
  -2 -15   2    1.09    2.32
  -1   0   1    0.23    0.40
  -1   0   1    0.37    0.42
  -1   0   1    0.25    0.85
  -1   0   1    0.70    0.85
   1   0  -1    0.49    0.39
   1   0  -1    0.00    0.41
   1   0  -1    0.66    0.84
   1   0  -1   -0.35    0.74
  -1   0   2 3470.29  218.71
  -1   0   2 3316.82  218.58
   1   0  -2 3589.79  218.69
   1   0  -2 3614.90  218.69
   1   0  -2 3582.34  223.39
  -1   0   3    0.01    0.81
  -1   0   3    0.57    0.86
  -1   0   3    0.02    1.08
   1   0  -3   -4.16    1.49
  -1   0   4   92.07    5.89
  -1   0   4   89.87    5.91
  -1   0   4   85.19    5.93
   1   0  -4   93.56    5.90
   1   0  -4   93.86    5.91
   1   0  -4   99.48    6.10
  -1   0   5   -2.80    1.02
  -1   0   5    0.13    1.05
  -1   0   5    0.84    1.27
   1   0  -5   -1.30    1.02
   1   0  -5    0.05    1.10
  -1   0   6  911.62   55.79
  -1   0   6  876.23   55.75
  -1   0   6  855.17   55.78
   1   0  -6  914.07   55.77
   1   0  -6  868.58   55.74
   1   0  -6  926.36   55.92
  -1   0   7   -0.38    1.13
  -1   0   7   -2.25    1.12
  -1   0   7   -4.43    1.36
   1   0  -7    0.11    1.17
   1   0  -7    0.52    1.24
   1   0  -7   -5.63    1.74
  -1   0   8  975.66   62.34
  -1   0   8  986.09   62.31
  -1   0   8  995.95   62.37
   1   0  -8 1029.26   62.49
  -1   0   9    0.38    1.25
  -1   0   9   -0.71    1.33
  -1   0   9    1.04    1.46
   1   0  -9   -3.07    1.48
   1   0  -9    0.33    1.40
   1   0  -9    0.71    1.87
  -1   0  10   53.65    3.99
  -1   0  10   57.04    4.02
  -1   0  10   57.01    4.04
   1   0 -10   58.82    4.01
   1   0 -10   58.45    4.03
   1   0 -10   58.45    4.31
  -1   0  11   -2.45    1.69
   1   0 -11    0.57    1.65
   1   0 -11   -2.31    1.67
   1   0 -11   -4.24    2.27
  -1   0  12  356.21   22.08
  -1   0  12  350.04   22.01
  -1   0  12  337.89   22.00
   1   0 -12  345.51   22.12
  -1   0  13   -0.71    1.71
  -1   0  13    1.51    1.84
   1   0 -13   -1.26    1.99
   1   0 -13   -8.76    2.00
   1   0 -13    1.09    2.30
  -1   0  14  169.79   11.02
  -1   0  14  164.28   10.97
  -1   0  14  167.24   10.95
   1   0 -14  169.88   11.03
   1   0 -14  177.00   11.04
   1   0 -14  164.15   11.10
  -1   0  15    0.24    1.79
  -1   0  15    0.52    1.98
  -1   0  15    0.42    2.02
   1   0 -15    0.70    1.95
   1   0 -15    3.20    2.22
   1   0 -15    0.87    2.39
  -1   0  16   -0.14    2.01
  -1   0  17    0.87    2.10
   1   0 -17   -1.97    2.68
  -1   0  18   18.78    2.58
   1   0 -18   23.73    3.21
  -1   0  19   -2.14    2.19
   1   0 -19    1.02    2.80
  -1   0  20  128.96    8.42
   1   0 -20  119.57    8.56
  -1   0  21   -3.05    2.24
   1   0 -21    4.50    2.70
  -1   0  22   59.57    4.55
  -1   1   1    4.05    0.71
  -1   1   1    3.26    0.86
  -1   1   1    3.18    1.11
   1  -1  -1    2.93    0.70
   1  -1  -1    3.54    1.02
   1   1  -1    2.75    0.73
  -1  -1   1    6.61    0.71
  -1  -1   1    6.52    0.72
  -1  -1   1    3.32    0.80
  -1  -1   1    2.91    1.05
  -1  -1   1    3.19    0.80
  -1   1   2 4131.17  278.52
  -1   1   2 4286.95  278.80
   1  -1  -2 4788.35  279.60
  -1  -1   2 4752.50  278.90
  -1  -1   2 4858.14  278.95
  -1  -1   2 4502.75  283.06
  -1  -1   2 4228.96  278.82
  -1   1   3 5414.82  353.74
  -1   1   3 5252.33  353.62
   1  -1  -3 5797.87  355.44
   1  -1  -3 5562.44  353.90
   1  -1  -3 5792.82  354.30
   1   1  -3 6079.12  354.19
   1   1  -3 6041.01  354.16
  -1  -1   3 5815.12  354.04
  -1  -1   3 5688.90  353.97
  -1  -1   3 5495.07  353.78
  -1   1   4 4007.84  254.56
  -1   1   4 3953.08  250.18
  -1   1   4 3901.93  250.36
   1  -1  -4 4031.24  250.34
   1  -1  -4 4007.86  250.15
   1  -1  -4 3928.65  250.36
   1   1  -4 4170.39  250.34
   1   1  -4 4117.42  250.32
   1   1  -4 4050.39  252.19
  -1  -1   4 4024.13  250.17
  -1  -1   4 3945.21  250.12
  -1  -1   4 3921.04  250.15
  -1   1   5  214.19   13.85
  -1   1   5  216.67   13.75
   1  -1  -5  217.73   13.75
   1  -1  -5  228.46   13.76
   1  -1  -5  214.82   13.86
   1   1  -5  214.61   13.77
   1   1  -5  214.61   13.77
   1   1  -5  234.89   13.92
  -1  -1   5  210.27   13.75
  -1  -1   5  214.22   13.76
  -1   1   6  162.50   10.64
  -1   1   6  166.33   10.59
  -1   1   6  152.08   10.58
   1  -1  -6  168.25   10.59
   1  -1  -6  178.57   10.60
   1  -1  -6  159.59   10.73
   1   1  -6  167.90   10.60
   1   1  -6  172.88   10.63
   1   1  -6  167.99   10.72
  -1  -1   6  173.17   10.60
  -1  -1   6  170.84   10.60
  -1  -1   6  154.48   10.62
  -1   1   7    9.44    1.34
  -1   1   7    9.84    1.36
  -1   1   7   10.61    1.47
   1  -1  -7   11.34    1.34
   1  -1  -7    9.98    1.44
   1  -1  -7    8.11    2.00
   1   1  -7   10.22    1.35
   1   1  -7   10.81    1.48
   1   1  -7   10.30    1.93
  -1  -1   7    8.91    1.38
  -1  -1   7   10.86    1.36
  -1  -1   7    9.30    1.58
  -1   1   8  504.21   33.10
  -1   1   8  505.76   32.95
  -1   1   8  518.85   32.93
   1  -1  -8  557.83   32.96
   1   1  -8  520.94   33.05
  -1  -1   8  521.00   32.93
  -1  -1   8  525.76   32.94
  -1  -1   8  534.30   32.96
  -1   1   9   39.08    2.98
  -1   1   9   43.80    3.08
  -1   1   9   39.60    3.04
   1  -1  -9   40.39    3.07
   1  -1  -9   38.78    3.06
   1  -1  -9   43.86    3.45
   1   1  -9   41.29    3.08
   1   1  -9   40.21    3.13
   1   1  -9   41.80    3.32
  -1  -1   9   39.18    2.96
  -1  -1   9   43.75    3.07
  -1  -1   9   42.97    3.12
  -1   1  10  511.22   34.34
  -1   1  10  536.55   34.20
  -1   1  10  530.46   34.17
   1  -1 -10  548.75   34.20
   1  -1 -10  561.03   34.21
   1  -1 -10  555.74   34.30
   1   1 -10  556.42   34.24
   1   1 -10  563.96   34.25
   1   1 -10  537.26   34.31
  -1  -1  10  537.15   34.19
  -1  -1  10  540.14   34.20
  -1  -1  10  539.31   34.19
   1  -1 -11  176.52   11.06
   1  -1 -11  170.30   11.07
   1  -1 -11  164.33   11.18
   1   1 -11  164.09   11.06
   1   1 -11  181.15   11.10
   1   1 -11  166.16   11.20
  -1  -1  11  176.09   11.06
  -1   1  12    3.90    1.56
  -1   1  12    4.19    1.86
  -1   1  12    3.21    1.76
   1  -1 -12    1.43    2.20
   1   1 -12    4.16    2.41
  -1  -1  12    2.79    1.73
  -1  -1  12    3.14    1.73
  -1  -1  12    1.43    1.77
  -1   1  13   26.70    2.49
  -1   1  13   23.34    2.52
  -1   1  13   20.75    2.47
   1  -1 -13   24.57    2.48
   1  -1 -13   20.22    2.53
   1  -1 -13   23.43    2.94
   1   1 -13   22.19    2.53
   1   1 -13   23.31    2.47
   1   1 -13   20.28    3.01
  -1  -1  13   23.82    2.45
  -1  -1  13   24.27    2.47
  -1  -1  13   24.34    2.49
  -1   1  14    3.71    1.74
  -1   1  14    2.45    2.00
  -1   1  14    4.62    1.97
   1  -1 -14    3.91    1.83
   1  -1 -14    2.94    1.95
   1  -1 -14    1.51    2.32
   1   1 -14    3.59    1.87
   1   1 -14    4.95    1.87
  -1  -1  14    3.62    1.78
  -1  -1  14    2.29    1.96
  -1  -1  14    3.26    1.97
  -1   1  15    5.99    1.82
  -1   1  15    6.18    2.09
  -1   1  15    6.98    2.13
   1   1 -15    3.62    1.98
   1   1 -15    7.30    2.01
   1   1 -15    2.90    2.51
  -1  -1  15    7.59    1.90
  -1  -1  15    3.53    2.07
  -1   1  16    5.97    2.13
   1  -1 -16    3.96    2.56
   1   1 -16    7.69    2.66
  -1  -1  16    1.59    2.04
  -1   1  17   41.44    3.48
   1  -1 -17   39.59    3.84
   1   1 -17   39.34    3.85
  -1  -1  17   39.13    3.43
  -1   1  18   95.19    6.65
   1   1 -18   95.29    7.00
  -1  -1  18   98.14    6.63
   1  -1 -19    7.77    2.73
   1   1 -19    5.53    2.87
  -1  -1  19    8.57    2.26
  -1   1  20    0.15    2.18
   1  -1 -20   -3.45    2.79
   1   1 -20    0.29    2.90
  -1  -1  20    1.41    2.15
  -1   1  21   -3.82    2.22
   1  -1 -21    1.19    2.87
   1   1 -21    0.65    2.68
  -1  -1  21    0.00    2.23
  -1   1  22    7.75    2.34
   1  -1 -22   13.11    2.89
   1   1 -22   10.55    3.01
  -1   2   1 1294.20   83.21
  -1   2   1 1407.33   83.33
  -1   2   1 1287.77   83.87
   1  -2  -1 1278.80   83.22
   1  -2  -1 1306.66   83.18
   1   2  -1 1414.70   83.63
  -1  -2   1 1366.11   83.25
  -1  -2   1 1315.19   83.23
  -1  -2   1 1326.52   83.18
  -1   2   2 9111.59  578.50
  -1   2   2 9116.08  579.21
   1  -2  -2 8987.50  578.29
   1  -2  -2 9366.02  578.54
  -1  -2   2 9713.08  581.29
  -1  -2   2 9948.52  581.76
  -1  -2   2 9999.00  583.63
  -1  -2   2 9074.33  579.38
  -1  -2   2 9002.53  578.45
  -1   2   3  370.08   23.95
  -1   2   3  351.24   23.95
   1  -2  -3  382.45   23.96
   1  -2  -3  383.83   24.01
   1   2  -3  403.87   24.14
   1   2  -3  404.85   24.15
  -1  -2   3  390.09   23.99
  -1  -2   3  385.64   23.99
  -1  -2   3  374.99   24.45
  -1  -2   3  382.83   23.98
  -1   2   4 1055.87   67.79
  -1   2   4 1067.97   67.88
   1  -2  -4 1071.44   68.83
   1  -2  -4 1083.34   67.83
   1  -2  -4 1090.65   67.90
   1   2  -4 1117.36   67.95
   1   2  -4 1131.38   67.97
  -1  -2   4 1060.31   67.83
  -1  -2   4 1066.84   67.84
  -1  -2   4 1101.74   67.89
  -1   2   5  965.66   63.65
   1  -2  -5 1008.87   63.75
   1   2  -5 1041.14   64.37
  -1  -2   5 1051.35   63.76
  -1  -2   5 1036.26   63.75
  -1  -2   5 1024.26   63.74
  -1   2   6  168.59   11.02
   1  -2  -6  170.98   11.03
   1  -2  -6  170.91   11.02
   1  -2  -6  171.12   11.13
   1   2  -6  174.89   11.05
   1   2  -6  175.85   11.07
   1   2  -6  178.51   11.17
  -1  -2   6  178.29   11.08
  -1   2   7  176.00   11.34
  -1   2   7  178.73   11.35
   1  -2  -7  189.73   11.50
   1   2  -7  182.17   11.38
   1   2  -7  182.33   11.37
   1   2  -7  183.00   11.48
  -1  -2   7  172.31   11.34
  -1  -2   7  168.61   11.34
  -1   2   8   82.08    5.17
   1  -2  -8   75.22    5.12
   1  -2  -8   75.66    5.19
   1  -2  -8   79.80    5.34
   1   2  -8   73.13    5.16
   1   2  -8   80.76    5.22
   1   2  -8   79.21    5.33
  -1  -2   8   73.63    5.15
  -1  -2   8   74.98    5.14
  -1  -2   8   82.80    5.22
  -1   2   9   31.12    2.48
  -1   2   9   33.13    2.47
   1  -2  -9   32.33    2.49
   1  -2  -9   31.38    2.53
   1  -2  -9   25.87    2.75
   1   2  -9   28.33    2.53
   1   2  -9   28.82    2.49
   1   2  -9   28.95    2.78
  -1  -2   9   28.48    2.47
  -1  -2   9   29.93    2.47
  -1  -2   9   30.65    2.55
  -1   2  10  570.98   35.52
  -1   2  10  546.17   35.51
   1  -2 -10  585.17   35.51
   1  -2 -10  571.85   35.51
   1   2 -10  554.41   35.53
   1   2 -10  569.61   35.55
   1   2 -10  555.62   35.60
  -1  -2  10  546.11   35.49
  -1  -2  10  560.66   35.50
  -1  -2  10  581.98   35.53
  -1   2  11    4.72    1.85
  -1   2  11    3.49    1.75
   1  -2 -11    6.60    1.75
   1  -2 -11    4.86    1.73
   1  -2 -11    4.36    2.29
   1   2 -11    2.97    1.75
   1   2 -11    3.93    1.70
  -1  -2  11    4.77    1.82
  -1   2  12  917.96   55.99
  -1   2  12  855.81   55.98
   1  -2 -12  925.67   56.04
   1  -2 -12  932.41   56.02
   1  -2 -12  894.40   56.15
  -1  -2  12  850.42   55.97
  -1  -2  12  862.42   55.99
  -1  -2  12  900.09   55.98
  -1   2  13  340.30   21.25
  -1   2  13  333.59   21.23
   1  -2 -13  354.20   21.27
   1  -2 -13  349.61   21.26
   1  -2 -13  337.29   21.37
   1   2 -13  324.97   21.26
   1   2 -13  334.84   21.26
   1   2 -13  341.34   21.40
  -1  -2  13  304.90   21.20
  -1  -2  13  322.85   21.24
  -1  -2  13  340.76   21.24
  -1   2  14  128.65    8.80
  -1   2  14  138.36    8.77
   1  -2 -14  143.78    8.82
   1  -2 -14  141.24    8.81
   1  -2 -14  131.47    8.92
   1   2 -14  125.80    8.79
   1   2 -14  132.87    8.80
   1   2 -14  135.70    9.02
  -1  -2  14  125.68    8.73
  -1  -2  14  125.72    8.77
  -1  -2  14  136.12    8.80
  -1   2  15    0.75    2.09
  -1   2  15   -5.13    2.08
   1  -2 -15    0.81    2.62
   1   2 -15    1.55    2.51
  -1  -2  15   -1.43    1.96
  -1  -2  15    0.18    1.97
  -1  -2  15    1.11    2.03
  -1   2  16    1.76    2.00
   1  -2 -16    2.79    2.41
   1   2 -16   -0.16    2.54
  -1  -2  16    3.41    2.01
   1  -2 -17    5.15    2.58
   1   2 -17    8.09    2.89
  -1   2  18    3.19    2.14
   1  -2 -18    1.60    2.49
   1   2 -18   -0.05    2.80
  -1  -2  18   -3.24    2.20
  -1   2  19    3.46    2.22
   1  -2 -19    0.58    2.66
  -1  -2  19    2.53    2.13
  -1   2  20   93.59    6.25
   1  -2 -20   92.15    6.48
   1   2 -20   83.25    6.57
  -1  -2  20   86.52    6.22
  -1   2  21   32.39    3.14
   1  -2 -21   28.02    3.48
   1   2 -21   35.56    3.65
  -1  -2  21   31.73    3.13
   1   2 -22   83.09    6.25
  -1   3   1  405.28   24.59
   1  -3  -1  380.09   24.58
   1  -3  -1  362.60   24.55
   1   3  -1  415.02   24.68
   1   3  -1  384.30   24.53
  -1  -3   1  400.21   24.63
  -1  -3   1  407.26   24.57
  -1   3   2  626.35   39.42
  -1   3   2  616.80   39.64
   1  -3  -2  625.87   39.41
  -1  -3   2  646.54   39.53
  -1  -3   2  627.89   39.43
  -1   3   3 1368.08   86.28
  -1   3   3 1339.11   86.35
   1  -3  -3 1400.49   86.23
   1  -3  -3 1334.96   86.28
  -1  -3   3 1389.61   86.48
  -1  -3   3 1354.41   86.47
  -1  -3   3 1409.45   86.94
  -1  -3   3 1374.34   86.73
  -1  -3   3 1429.51   86.27
   1  -3  -4  144.73    9.34
   1   3  -4  142.87    9.43
   1   3  -4  142.57    9.44
  -1  -3   4  148.65    9.30
  -1  -3   4  151.58    9.30
  -1  -3   4  143.93    9.64
  -1  -3   4  140.39    9.29
   1  -3  -5   41.53    2.80
   1  -3  -5   40.43    2.98
   1   3  -5   35.36    2.84
   1   3  -5   36.77    2.89
  -1  -3   5   39.98    2.87
  -1   3   6    2.89    1.20
   1  -3  -6    2.06    1.22
   1  -3  -6    1.79    1.17
   1  -3  -6    3.18    1.66
   1   3  -6    3.02    1.32
   1   3  -6    1.41    1.34
   1   3  -6    2.73    1.57
  -1  -3   6    3.65    1.19
  -1  -3   6    2.59    1.30
  -1  -3   6    3.64    1.44
  -1   3   7    7.30    1.39
  -1   3   7    6.77    1.33
   1  -3  -7    5.75    1.40
   1  -3  -7    7.36    1.37
   1  -3  -7    8.26    1.74
   1   3  -7    5.43    1.67
  -1  -3   7    3.53    1.28
  -1  -3   7    4.26    1.46
  -1  -3   7    6.13    1.53
  -1   3   8  397.28   25.68
  -1   3   8  401.88   25.65
   1  -3  -8  413.00   25.69
   1  -3  -8  426.92   25.70
   1  -3  -8  399.83   25.78
   1   3  -8  413.73   25.73
   1   3  -8  407.86   25.74
   1   3  -8  419.63   25.81
  -1  -3   8  392.96   25.66
  -1  -3   8  403.96   25.68
  -1  -3   8  408.31   25.71
  -1   3   9  120.46    7.64
  -1   3   9  115.56    7.62
   1  -3  -9  116.68    7.63
   1  -3  -9  115.32    7.65
   1  -3  -9  115.91    7.77
   1   3  -9  125.30    7.71
   1   3  -9  123.60    7.69
  -1  -3   9  114.52    7.61
  -1  -3   9  109.13    7.62
  -1   3  10   53.01    3.58
   1  -3 -10   49.14    3.57
   1  -3 -10   49.17    3.67
   1  -3 -10   48.93    3.96
   1   3 -10   49.28    3.67
   1   3 -10   49.34    3.68
   1   3 -10   48.89    3.90
  -1  -3  10   46.43    3.60
  -1  -3  10   48.28    3.59
  -1   3  11  161.51   10.61
  -1   3  11  164.62   10.60
   1  -3 -11  175.54   10.65
   1  -3 -11  177.74   10.66
   1  -3 -11  175.76   10.82
   1   3 -11  157.59   10.65
   1   3 -11  159.67   10.68
   1   3 -11  150.46   10.73
  -1  -3  11  156.03   10.63
  -1  -3  11  156.29   10.61
  -1  -3  11  176.44   10.67
  -1   3  12   27.68    2.57
  -1   3  12   27.76    2.55
   1  -3 -12   29.99    2.54
   1  -3 -12   29.89    2.66
   1   3 -12   23.63    2.61
   1   3 -12   21.81    2.68
   1   3 -12   28.37    2.96
  -1  -3  12   25.74    2.59
  -1  -3  12   25.55    2.66
  -1  -3  12   25.69    2.72
  -1   3  13   24.42    2.43
  -1   3  13   22.25    2.41
   1  -3 -13   24.07    2.48
   1  -3 -13   23.23    2.49
   1   3 -13   23.63    2.64
   1   3 -13   17.72    2.47
   1   3 -13   22.96    2.89
  -1  -3  13   17.91    2.30
  -1  -3  13   19.96    2.59
  -1  -3  13   23.82    2.50
  -1   3  14    0.00    1.91
   1  -3 -14    0.36    1.87
   1  -3 -14    0.76    1.91
   1  -3 -14    0.53    2.49
   1   3 -14    0.69    1.95
   1   3 -14   -0.12    1.96
   1   3 -14    0.01    2.66
  -1  -3  14    0.43    1.99
  -1   3  15   11.91    2.33
   1  -3 -15   14.70    2.24
   1  -3 -15   19.67    2.33
   1  -3 -15   18.03    2.62
   1   3 -15   12.66    3.02
  -1  -3  15   17.13    2.32
  -1   3  16   30.95    2.96
   1  -3 -16   28.59    3.16
   1   3 -16   28.13    3.39
  -1  -3  16   31.69    2.94
  -1   3  17    1.39    2.07
   1  -3 -17    0.53    2.53
   1   3 -17    0.35    2.62
  -1  -3  17    0.65    2.01
  -1   3  18   86.51    6.09
   1  -3 -18   93.89    6.32
   1   3 -18   79.23    6.45
  -1  -3  18   88.68    6.10
  -1   3  19    1.55    2.17
   1  -3 -19    0.68    2.54
   1   3 -19    2.32    2.83
  -1   3  20    1.08    2.22
   1  -3 -20    3.91    2.55
   1   3 -20    1.16    2.91
  -1  -3  20    1.47    2.18
  -1   3  21    2.61    2.36
   1   3 -21    2.43    3.03
  -1  -3  21   -7.40    2.13
  -1   3  22    9.84    2.47
   1  -4  -1   58.92    4.48
   1   4  -1   76.05    4.63
  -1  -4   1   68.24    4.60
  -1  -4   1   73.77    4.59
  -1  -4   1   71.68    4.49
   1  -4  -2 1520.20   97.34
   1   4  -2 1622.64   98.71
  -1  -4   2 1583.41   97.46
  -1  -4   2 1547.77   97.46
   1  -4  -3  406.13   24.94
  -1  -4   3  390.88   25.09
  -1  -4   3  404.71   25.14
  -1  -4   3  406.55   25.01
  -1  -4   3  375.83   24.96
  -1   4   4  552.45   33.74
  -1   4   4  520.32   33.73
   1  -4  -4  537.30   33.69
  -1  -4   4  510.45   33.91
  -1  -4   4  554.55   33.74
  -1   4   5  185.77   11.81
  -1   4   5  191.04   11.83
   1  -4  -5  189.03   11.88
  -1  -4   5  184.58   11.83
  -1  -4   5  182.27   11.83
  -1  -4   5  170.51   12.04
  -1  -4   5  192.16   11.84
  -1   4   6   25.52    2.12
  -1   4   6   25.86    2.09
   1  -4  -6   25.15    2.18
   1  -4  -6   29.62    2.41
  -1  -4   6   23.24    2.11
  -1  -4   6   22.84    2.17
  -1  -4   6   27.00    2.27
  -1   4   7  147.03    9.13
  -1   4   7  139.94    9.09
   1  -4  -7  145.00    9.19
   1  -4  -7  150.30    9.13
   1  -4  -7  145.77    9.22
   1   4  -7  136.26    9.20
   1   4  -7  141.99    9.24
  -1  -4   7  134.86    9.12
  -1  -4   7  132.40    9.12
  -1  -4   7  144.82    9.15
  -1   4   8   34.03    2.74
  -1   4   8   34.89    2.66
   1  -4  -8   35.13    2.69
   1  -4  -8   36.52    2.75
   1  -4  -8   33.01    3.04
   1   4  -8   35.62    2.79
   1   4  -8   35.20    2.80
   1   4  -8   38.07    2.96
  -1  -4   8   32.15    2.69
  -1  -4   8   34.22    2.73
  -1  -4   8   32.88    2.87
  -1   4   9   64.15    4.40
  -1   4   9   66.53    4.36
   1  -4  -9   67.21    4.40
   1  -4  -9   65.67    4.42
   1  -4  -9   68.10    4.65
   1   4  -9   64.16    4.46
   1   4  -9   60.03    4.50
   1   4  -9   57.51    4.64
  -1  -4   9   56.22    4.31
  -1  -4   9   58.84    4.39
  -1  -4   9   65.21    4.45
  -1   4  10  680.27   43.96
  -1   4  10  675.18   43.96
   1  -4 -10  728.51   44.01
   1  -4 -10  678.65   43.98
   1  -4 -10  721.83   44.08
   1   4 -10  710.87   44.12
   1   4 -10  695.26   44.12
   1   4 -10  723.20   44.18
  -1  -4  10  698.63   44.02
  -1   4  11   63.96    4.60
  -1   4  11   65.01    4.56
   1  -4 -11   68.94    4.64
   1  -4 -11   66.79    4.67
   1  -4 -11   63.81    4.81
   1   4 -11   69.04    4.88
  -1  -4  11   58.65    4.61
  -1  -4  11   62.89    4.60
  -1  -4  11   67.96    4.75
  -1   4  12  749.87   45.42
  -1   4  12  731.75   45.39
   1  -4 -12  762.37   45.44
   1  -4 -12  781.82   45.46
   1  -4 -12  725.89   45.50
   1   4 -12  713.40   45.51
   1   4 -12  705.89   45.51
   1   4 -12  700.56   45.51
  -1  -4  12  684.17   45.39
  -1  -4  12  665.35   45.37
  -1   4  13   39.22    3.28
   1  -4 -13   42.45    3.22
   1  -4 -13   43.13    3.37
   1  -4 -13   41.87    3.68
   1   4 -13   36.60    3.34
   1   4 -13   36.57    3.43
   1   4 -13   37.61    3.65
  -1  -4  13   37.61    3.29
  -1  -4  13   33.66    3.33
  -1  -4  13   41.15    3.30
  -1   4  14   58.40    4.29
  -1   4  14   58.85    4.21
   1   4 -14   55.25    4.35
   1   4 -14   53.68    4.37
   1   4 -14   52.89    4.57
  -1  -4  14   56.88    4.25
  -1  -4  14   53.46    4.25
  -1   4  15   21.56    2.53
   1   4 -15   19.78    3.13
  -1  -4  15   23.24    2.53
  -1   4  16   -7.35    2.22
   1  -4 -16    3.70    2.41
  -1  -4  16    2.22    2.04
  -1   4  17   24.85    2.85
   1  -4 -17   23.85    3.05
   1   4 -17   27.14    3.25
  -1  -4  17   23.35    2.68
  -1   4  18    6.39    2.32
   1  -4 -18    6.90    2.48
   1   4 -18    4.60    2.77
  -1  -4  18    5.03    2.17
   1  -4 -19   30.27    3.20
   1   4 -19   23.99    3.43
  -1  -4  19   24.16    2.89
  -1   4  20   40.72    3.62
   1  -4 -20   40.13    3.76
   1   4 -20   37.32    4.13
  -1  -4  20   40.64    3.53
  -1   4  21    1.99    2.26
   1  -4 -21    0.33    2.53
   1   4 -21    2.55    2.98
   1   4 -22   28.79    3.55
  -1   5   1   52.71    3.47
   1  -5  -1   48.86    3.40
   1  -5  -1   46.68    3.33
   1  -5  -1   47.92    3.54
   1   5  -1   48.74    3.54
  -1  -5   1   48.94    3.48
  -1  -5   1   52.60    3.34
  -1   5   2  176.01   10.38
   1  -5  -2  162.90   10.37
   1   5  -2  157.34   10.50
  -1  -5   2  155.51   10.37
  -1  -5   2  158.51   10.32
  -1   5   3    4.59    1.35
   1  -5  -3    3.18    1.37
  -1  -5   3    1.79    1.28
  -1  -5   3    4.02    1.32
  -1  -5   3    3.43    1.41
  -1  -5   3    3.06    1.20
  -1  -5   3    4.78    1.33
  -1   5   4   58.79    3.97
  -1   5   4   57.63    3.96
   1  -5  -4   59.29    3.97
   1  -5  -4   63.41    4.03
  -1  -5   4   54.31    3.95
  -1  -5   4   56.90    3.98
  -1  -5   4   55.22    4.00
  -1  -5   4   57.80    3.98
  -1   5   5    0.60    1.32
  -1   5   5    1.11    1.22
   1  -5  -5    0.40    1.46
   1  -5  -5    0.12    1.55
  -1  -5   5    0.75    1.27
  -1  -5   5    1.53    1.44
  -1  -5   5    0.12    1.41
  -1  -5   5    2.24    1.25
  -1  -5   5    0.97    1.48
  -1   5   6    9.95    1.49
  -1   5   6    8.50    1.49
   1  -5  -6    8.92    1.44
  -1  -5   6    5.87    1.51
  -1  -5   6    7.58    1.48
  -1  -5   6    7.75    1.65
  -1   5   7    0.34    1.45
  -1   5   7    0.44    1.42
   1  -5  -7    0.78    1.31
   1  -5  -7    0.42    1.47
   1  -5  -7    0.56    1.68
   1   5  -7    0.09    1.55
  -1  -5   7   -0.88    1.43
  -1  -5   7    0.82    1.47
  -1  -5   7    0.38    1.24
  -1  -5   7    0.80    1.60
  -1   5   8  617.93   38.24
  -1   5   8  565.25   38.20
   1  -5  -8  625.25   38.56
   1  -5  -8  639.87   38.28
   1  -5  -8  623.60   38.32
   1   5  -8  617.00   39.00
   1   5  -8  596.91   38.92
   1   5  -8  613.85   38.53
  -1  -5   8  582.09   38.25
  -1  -5   8  591.38   38.27
  -1  -5   8  628.87   38.25
  -1   5   9    3.31    1.67
  -1   5   9    0.47    1.61
   1  -5  -9    0.92    1.54
   1  -5  -9    0.38    1.68
   1  -5  -9    0.74    2.03
   1   5  -9   -0.28    1.77
   1   5  -9   -3.55    1.85
   1   5  -9    1.47    2.03
  -1  -5   9    1.60    1.85
  -1   5  10  571.13   34.00
  -1   5  10  545.68   33.93
   1  -5 -10  558.70   34.05
   1   5 -10  546.45   34.08
  -1  -5  10  508.66   33.93
  -1  -5  10  520.83   33.94
  -1  -5  10  525.57   33.95
  -1   5  11   -1.05    1.81
   1  -5 -11    2.04    1.74
   1  -5 -11    0.74    1.94
   1  -5 -11   -6.00    2.26
   1   5 -11   -3.67    1.90
   1   5 -11    1.90    1.96
   1   5 -11    0.50    2.42
  -1  -5  11   -4.29    1.70
  -1  -5  11   -0.33    2.01
  -1  -5  11    1.59    1.99
  -1   5  12    4.92    1.91
  -1   5  12    4.22    1.88
   1  -5 -12    4.59    1.79
   1  -5 -12    3.18    2.04
   1  -5 -12    3.06    2.37
   1   5 -12    3.27    1.96
   1   5 -12    1.63    2.16
   1   5 -12    5.48    2.46
  -1  -5  12    2.45    2.03
  -1  -5  12    1.82    1.91
  -1  -5  12    2.12    2.06
  -1   5  13   25.07    2.64
  -1   5  13   25.04    2.58
   1  -5 -13   22.08    2.46
   1  -5 -13   26.62    2.73
   1  -5 -13   23.37    2.94
   1   5 -13   23.53    2.67
   1   5 -13   22.84    2.76
   1   5 -13   26.72    3.17
  -1  -5  13   24.65    2.72
  -1   5  14   84.64    5.86
  -1   5  14   80.99    5.81
   1  -5 -14   81.64    5.79
   1  -5 -14   90.00    5.90
   1  -5 -14   82.17    5.97
  -1   5  15    5.96    2.12
   1  -5 -15    5.65    2.42
   1   5 -15    7.50    2.78
  -1  -5  15    5.36    2.02
  -1   5  16   90.81    6.02
   1  -5 -16   86.53    6.17
   1   5 -16   77.56    6.31
  -1  -5  16   86.36    6.00
   1   5 -17   43.82    4.12
  -1  -5  17   44.87    3.72
  -1   5  18  136.89    9.42
   1  -5 -18  146.97    9.58
   1   5 -18  139.20    9.70
  -1  -5  18  146.35    9.44
  -1   5  19   20.69    2.77
   1  -5 -19   29.52    3.03
  -1  -5  19   20.29    2.74
  -1   5  20   17.74    2.62
   1  -5 -20   16.20    2.83
   1   5 -20   15.94    3.29
  -1  -5  20   19.49    2.62
   1   5 -21    4.20    3.03
  -1   6   1    5.45    1.45
   1  -6  -1    3.19    1.39
   1   6  -1    2.14    1.70
  -1  -6   1    2.47    1.29
  -1  -6   1    3.85    1.30
  -1  -6   1    4.50    1.14
  -1   6   2   30.41    2.45
   1  -6  -2   28.02    2.37
   1  -6  -2   27.46    2.27
   1  -6  -2   28.87    2.41
   1   6  -2   31.72    2.58
  -1  -6   2   28.28    2.36
  -1  -6   2   27.29    2.34
  -1  -6   2   30.31    2.29
  -1   6   3   39.35    2.88
   1  -6  -3   40.50    2.90
   1  -6  -3   38.63    2.91
  -1  -6   3   34.74    2.94
  -1  -6   3   36.82    2.92
  -1  -6   3   35.89    2.88
  -1  -6   3   37.58    2.82
  -1  -6   3   43.09    2.86
  -1   6   4   47.14    3.41
   1  -6  -4   47.71    3.44
   1  -6  -4   49.63    3.48
  -1  -6   4   46.47    3.47
  -1  -6   4   46.02    3.52
  -1  -6   4   50.54    3.45
  -1  -6   4   50.09    3.48
  -1   6   5   95.17    6.10
  -1   6   5   88.52    6.03
   1  -6  -5   99.53    6.06
   1  -6  -5   91.51    6.07
  -1  -6   5   86.67    6.04
  -1  -6   5   89.54    6.12
  -1  -6   5   85.71    6.10
  -1  -6   5   92.77    6.11
  -1  -6   5   92.94    6.07
  -1   6   6  378.05   23.56
  -1   6   6  367.83   23.59
   1  -6  -6  387.37   23.56
   1  -6  -6  378.35   23.55
  -1  -6   6  360.87   23.56
  -1  -6   6  364.77   23.56
  -1  -6   6  368.65   23.68
  -1   6   7   21.30    2.09
   1  -6  -7   21.88    2.19
   1  -6  -7   26.14    2.43
  -1  -6   7   20.60    2.18
  -1  -6   7   20.18    2.20
  -1  -6   7   18.65    2.30
  -1  -6   7   19.01    2.23
  -1   6   8  191.05   12.11
   1  -6  -8  197.02   12.32
   1  -6  -8  194.43   12.11
   1   6  -8  181.66   12.22
  -1  -6   8  171.65   12.22
  -1  -6   8  192.91   12.14
  -1   6   9    3.81    1.81
  -1   6   9    5.29    1.77
   1  -6  -9    2.44    1.75
   1  -6  -9    3.70    1.71
   1  -6  -9    4.86    2.17
   1   6  -9    4.02    2.03
  -1  -6   9    4.59    1.70
  -1  -6   9    6.07    1.83
  -1  -6   9    3.17    1.98
  -1   6  10   90.75    6.06
  -1   6  10   86.57    6.04
   1  -6 -10   89.49    6.07
   1  -6 -10   92.12    6.09
   1  -6 -10   85.32    6.22
   1   6 -10   91.45    6.23
  -1  -6  10   91.50    6.12
  -1  -6  10   85.96    6.10
  -1  -6  10   89.45    6.12
  -1   6  11   63.11    4.30
  -1   6  11   60.66    4.29
   1  -6 -11   59.71    4.27
   1  -6 -11   63.28    4.35
   1  -6 -11   55.48    4.46
   1   6 -11   56.10    4.41
   1   6 -11   57.07    4.53
  -1  -6  11   53.53    4.23
  -1  -6  11   58.05    4.36
  -1  -6  11   58.60    4.34
  -1   6  12  156.86   10.53
   1  -6 -12  169.96   10.56
   1  -6 -12  163.61   10.61
   1  -6 -12  165.93   10.67
   1   6 -12  152.37   10.74
   1   6 -12  156.11   10.78
   1   6 -12  174.74   10.79
  -1  -6  12  162.81   10.60
  -1  -6  12  150.62   10.57
  -1  -6  12  170.41   10.60
  -1   6  13   49.81    3.90
  -1   6  13   43.28    3.80
   1  -6 -13   54.05    3.82
   1  -6 -13   51.60    3.87
   1  -6 -13   52.52    4.03
   1   6 -13   44.43    4.24
  -1  -6  13   45.39    3.81
  -1  -6  13   41.88    3.83
  -1  -6  13   51.07    3.85
  -1   6  14   71.43    5.69
   1  -6 -14   82.59    5.87
   1   6 -14   77.90    6.00
  -1  -6  14   94.23    5.78
   1  -6 -15    6.00    2.35
   1   6 -15    0.09    2.76
  -1  -6  15    0.60    2.06
  -1   6  16   45.57    4.08
   1  -6 -16   54.51    4.29
   1   6 -16   57.63    4.56
  -1  -6  16   54.77    4.16
  -1   6  17    1.28    2.18
   1  -6 -17   -2.42    2.36
   1   6 -17   -2.28    2.95
  -1   6  18   19.88    2.75
   1  -6 -18   27.12    2.96
   1   6 -18   21.40    3.27
  -1  -6  18   23.88    2.76
   1   6 -19    6.63    2.95
  -1  -6  19    1.41    2.20
   1  -6 -20   38.79    3.67
   1   6 -20   39.53    4.01
  -1  -6  20   37.29    3.41
  -1   7   1  188.28   11.72
   1  -7  -1  173.40   11.67
   1  -7  -1  186.82   11.74
   1   7  -1  189.91   11.79
  -1  -7   1  173.71   11.65
  -1  -7   1  179.15   11.66
  -1  -7   1  186.64   11.61
  -1   7   2  704.36   40.63
   1  -7  -2  658.27   40.59
   1  -7  -2  667.26   40.55
   1  -7  -2  633.62   40.86
   1   7  -2  643.12   40.93
  -1  -7   2  615.63   40.59
  -1  -7   2  606.83   40.52
  -1  -7   2  637.52   40.52
  -1   7   3  119.70    7.49
   1  -7  -3  113.55    7.40
   1  -7  -3  112.22    7.37
   1  -7  -3  114.44    7.57
  -1  -7   3  111.18    7.44
  -1  -7   3  108.59    7.38
  -1  -7   3  114.84    7.38
  -1   7   4  142.98    9.03
   1  -7  -4  145.57    9.01
   1  -7  -4  137.05    9.01
  -1  -7   4  138.92    9.08
  -1  -7   4  138.73    9.10
  -1  -7   4  126.98    9.02
  -1  -7   4  132.36    8.98
  -1  -7   4  149.83    9.01
   1  -7  -5   28.79    2.45
   1  -7  -5   24.14    2.52
  -1  -7   5   27.49    2.44
  -1  -7   5   23.97    2.54
  -1  -7   5   27.13    2.42
  -1  -7   5   26.72    2.37
  -1  -7   5   27.05    2.47
  -1   7   6    2.27    1.57
   1  -7  -6    1.79    1.62
   1  -7  -6    1.10    1.91
  -1  -7   6    2.31    1.66
  -1  -7   6   -2.65    1.57
  -1  -7   6    1.68    1.79
  -1   7   7   19.05    2.17
  -1   7   7   16.68    1.97
   1  -7  -7   18.62    2.30
  -1  -7   7   18.06    2.17
  -1  -7   7   16.38    2.09
  -1  -7   7   15.88    2.15
  -1  -7   7   14.88    2.26
  -1   7   8  223.23   13.74
  -1   7   8  212.90   13.69
   1  -7  -8  227.21   13.72
   1  -7  -8  213.14   13.75
   1   7  -8  210.68   13.91
  -1  -7   8  200.29   13.71
  -1  -7   8  208.27   13.71
  -1   7   9    0.41    1.86
  -1   7   9    1.96    1.69
   1  -7  -9    2.26    1.73
   1  -7  -9    1.10    1.83
   1  -7  -9    1.80    2.07
  -1  -7   9    1.69    1.82
  -1  -7   9    0.07    1.97
  -1  -7   9   -0.13    1.85
  -1   7  10   73.94    4.79
  -1   7  10   66.74    4.69
   1  -7 -10   70.32    4.74
   1  -7 -10   72.00    4.74
   1  -7 -10   60.63    4.88
   1   7 -10   67.53    4.94
  -1  -7  10   56.00    4.71
  -1  -7  10   63.10    4.80
  -1  -7  10   61.75    4.84
  -1  -7  10   66.41    4.80
  -1   7  11    2.58    1.97
   1  -7 -11    1.29    1.90
   1  -7 -11    2.72    1.95
   1   7 -11    2.10    2.43
  -1  -7  11    2.38    1.73
  -1  -7  11    0.17    2.14
  -1  -7  11    1.90    1.93
  -1  -7  11    5.05    2.06
  -1   7  12    4.46    2.04
  -1   7  12    3.46    2.08
   1  -7 -12    3.84    2.07
   1  -7 -12    5.91    2.13
   1  -7 -12    6.78    2.23
   1   7 -12    9.35    2.68
  -1  -7  12    3.76    1.91
  -1  -7  12    4.60    2.07
   1  -7 -13   41.13    3.54
   1   7 -13   34.52    3.88
  -1  -7  13   43.76    3.50
  -1   7  14   35.85    3.35
   1  -7 -14   37.85    3.47
   1   7 -14   31.25    3.72
  -1  -7  14   43.32    3.34
  -1   7  15    4.11    2.23
   1  -7 -15    1.98    2.36
  -1  -7  15    1.31    2.09
  -1   7  16   -1.27    2.21
   1  -7 -16    1.57    2.40
   1   7 -16   -4.13    2.74
  -1  -7  16    2.13    2.12
  -1   7  17    9.35    2.37
   1  -7 -17    8.33    2.55
   1   7 -17    9.06    2.91
  -1  -7  17    7.69    2.26
   1  -7 -18    0.00    2.36
   1   7 -18    1.66    2.80
  -1  -7  18   -0.83    2.17
   1  -7 -19    0.21    2.55
  -1   8   1   13.48    1.81
   1  -8  -1    7.71    1.83
   1  -8  -1    8.96    1.59
   1  -8  -1    8.52    2.04
   1   8  -1    7.21    2.22
  -1  -8   1   11.41    1.63
  -1  -8   1    7.24    1.66
  -1  -8   1   10.43    1.49
  -1   8   2  285.32   16.92
   1  -8  -2  261.65   16.84
   1  -8  -2  282.72   16.81
   1  -8  -2  274.02   16.92
   1   8  -2  263.82   17.09
  -1  -8   2  248.37   16.86
  -1  -8   2  241.58   16.79
  -1   8   3   31.57    2.82
   1  -8  -3   30.38    2.65
   1  -8  -3   31.24    2.75
  -1  -8   3   26.72    2.62
  -1  -8   3   29.96    2.52
  -1  -8   3   33.78    2.63
   1  -8  -4  224.27   13.57
   1  -8  -4  218.49   13.82
  -1  -8   4  194.27   13.64
  -1  -8   4  202.21   13.68
  -1  -8   4  206.60   13.61
  -1  -8   4  221.95   13.56
  -1   8   5  107.93    6.71
   1  -8  -5  103.07    6.68
   1  -8  -5   97.41    6.65
  -1  -8   5   94.92    6.67
  -1  -8   5   93.88    6.76
  -1  -8   5  100.63    6.67
  -1   8   6   94.93    6.01
   1  -8  -6   83.57    5.96
   1  -8  -6   94.72    6.07
  -1  -8   6   78.95    5.99
  -1  -8   6   82.90    6.03
  -1  -8   6   90.78    6.11
  -1  -8   6   90.98    6.01
  -1   8   7  185.60   11.55
   1  -8  -7  179.16   11.56
   1  -8  -7  185.98   11.62
  -1  -8   7  173.61   11.56
  -1  -8   7  170.90   11.57
  -1  -8   7  160.51   11.60
  -1  -8   7  194.84   11.59
  -1   8   8  239.31   14.36
  -1   8   8  218.33   14.48
   1  -8  -8  231.85   14.34
   1  -8  -8  242.13   14.41
  -1  -8   8  206.33   14.32
  -1  -8   8  217.42   14.36
  -1  -8   8  210.81   14.43
  -1  -8   8  221.28   14.36
  -1   8   9   96.64    6.57
   1  -8  -9  111.79    6.78
   1  -8  -9   97.79    6.61
   1  -8  -9  105.60    6.77
   1   8  -9   94.02    6.73
  -1  -8   9   93.12    6.65
  -1  -8   9   96.81    6.67
  -1  -8   9   88.14    6.70
  -1  -8   9   95.25    6.67
  -1   8  10    1.50    2.07
  -1   8  10    1.73    1.84
   1  -8 -10    1.93    1.81
   1  -8 -10    1.37    1.88
   1  -8 -10    4.50    2.30
  -1  -8  10    0.37    1.87
  -1  -8  10    1.40    2.15
  -1   8  11    7.73    2.24
   1  -8 -11    8.71    1.95
   1  -8 -11    7.70    1.97
   1   8 -11    8.10    2.54
  -1  -8  11    9.48    2.04
  -1  -8  11    5.27    2.19
  -1   8  12  116.60    7.99
   1  -8 -12  136.65    8.18
   1   8 -12  106.70    8.25
  -1  -8  12  121.21    8.06
  -1   8  13    3.90    2.10
   1  -8 -13    0.27    2.36
  -1  -8  13    0.77    2.18
  -1   8  14   12.44    2.42
   1   8 -14    9.13    2.91
  -1  -8  14   17.37    2.40
   1  -8 -15    4.74    2.50
   1   8 -15    2.62    2.75
  -1  -8  15    2.42    2.12
   1  -8 -16   66.07    4.99
   1   8 -16   64.40    5.21
  -1  -8  16   64.80    4.84
   1  -8 -17   82.01    5.63
   1   8 -17   67.38    5.85
  -1  -8  17   76.58    5.48
   1  -8 -18    5.77    2.50
  -1  -8  18    4.84    2.19
   1  -8 -19   15.63    2.71
  -1  -8  19   15.10    2.52
  -1   9   1   22.75    2.54
   1  -9  -1   25.44    2.51
   1  -9  -1   24.71    2.32
   1  -9  -1   28.52    2.70
   1   9  -1   25.55    2.81
  -1  -9   1   21.61    2.31
  -1  -9   1   21.55    2.39
  -1  -9   1   26.26    2.25
  -1   9   2  100.19    6.30
   1  -9  -2   85.68    6.24
   1  -9  -2   92.05    6.18
   1  -9  -2   89.71    6.31
   1   9  -2   90.37    6.52
  -1  -9   2   95.06    6.17
  -1   9   3   19.13    2.47
   1  -9  -3   20.47    2.24
   1  -9  -3   20.29    2.24
  -1  -9   3   16.78    2.29
  -1  -9   3   13.09    2.27
  -1  -9   3   21.86    2.10
  -1  -9   3   18.33    2.23
  -1   9   4   53.67    3.86
   1  -9  -4   48.63    3.73
   1  -9  -4   51.50    3.71
   1  -9  -4   53.37    3.72
  -1  -9   4   44.82    3.70
  -1  -9   4   47.42    3.78
  -1  -9   4   40.11    3.61
  -1  -9   4   43.71    3.59
  -1   9   5   67.07    4.53
   1  -9  -5   60.74    4.41
   1  -9  -5   63.35    4.40
   1  -9  -5   58.06    4.44
  -1  -9   5   62.63    4.41
  -1  -9   5   58.15    4.48
  -1  -9   5   56.29    4.39
  -1  -9   5   53.19    4.34
  -1  -9   5   64.11    4.42
  -1   9   6   36.48    3.14
   1  -9  -6   34.79    3.07
   1  -9  -6   36.32    3.15
  -1  -9   6   34.83    3.23
  -1  -9   6   31.85    3.16
  -1  -9   6   31.48    3.05
  -1  -9   6   38.07    3.06
  -1  -9   6   41.07    3.15
   1  -9  -7   90.30    5.94
   1  -9  -7   86.58    5.95
  -1  -9   7   84.16    5.95
  -1  -9   7   82.48    5.97
  -1  -9   7   75.57    5.99
  -1  -9   7   93.50    5.94
  -1   9   8  348.43   21.57
   1  -9  -8  344.43   21.57
   1  -9  -8  346.69   21.60
  -1  -9   8  310.10   21.63
  -1  -9   8  342.25   21.57
  -1   9   9    7.70    2.01
   1  -9  -9   11.13    2.13
   1  -9  -9    9.93    2.36
   1   9  -9    9.54    2.37
  -1  -9   9    8.74    2.19
  -1  -9   9   10.27    2.23
  -1  -9   9    8.23    2.25
  -1   9  10   36.97    3.25
  -1   9  10   34.58    3.01
   1  -9 -10   37.27    3.14
   1  -9 -10   35.27    3.09
   1   9 -10   26.77    3.35
  -1   9  11    0.46    1.87
   1  -9 -11   -5.28    2.46
  -1  -9  11    1.52    2.06
  -1   9  12    3.76    2.03
   1  -9 -12    0.49    2.41
   1   9 -12    0.11    2.67
  -1  -9  12    0.89    2.20
  -1   9  13   46.27    4.09
   1  -9 -13   61.93    4.39
   1   9 -13   53.34    4.59
  -1  -9  13   53.38    4.19
   1  -9 -14    5.28    2.48
   1  -9 -15    3.90    2.41
   1   9 -15    1.19    2.64
   1  -9 -16   26.39    3.20
  -1  -9  16   24.42    2.87
  -1  -9  17    1.08    2.22
   1  -9 -18    1.53    2.58
  -1  -9  18   -1.91    2.22
  -1  10   1    4.52    2.21
   1 -10  -1    7.80    2.01
   1 -10  -1    6.23    1.87
   1  10  -1    5.47    2.38
  -1 -10   1    4.99    1.66
  -1 -10   1    6.25    1.95
  -1 -10   1    6.98    1.79
  -1  10   2  132.21    8.34
   1 -10  -2  123.35    8.28
   1 -10  -2  133.76    8.24
   1 -10  -2  131.05    8.38
   1  10  -2  122.91    8.62
  -1 -10   2  119.38    8.26
  -1 -10   2  115.77    8.23
  -1 -10   2  122.95    8.20
  -1  10   3  125.59    7.93
   1 -10  -3  121.10    7.79
   1 -10  -3  123.89    7.76
   1 -10  -3  118.45    7.86
  -1 -10   3  115.77    8.01
  -1 -10   3  110.98    7.95
  -1 -10   3  107.03    7.81
  -1 -10   3  117.18    7.73
  -1 -10   3  112.82    7.74
   1 -10  -4   57.30    4.15
   1 -10  -4   59.59    4.16
   1 -10  -4   58.13    4.27
  -1 -10   4   51.61    4.17
  -1 -10   4   54.91    4.26
  -1 -10   4   45.71    4.09
  -1 -10   4   53.94    4.08
  -1 -10   4   57.67    4.15
  -1  10   5   26.96    3.05
   1 -10  -5   29.79    2.79
   1 -10  -5   31.61    2.94
   1 -10  -5   29.89    2.91
  -1 -10   5   28.49    2.83
  -1 -10   5   30.53    2.99
  -1 -10   5   26.01    2.76
  -1 -10   5   27.99    2.83
  -1 -10   5   33.17    2.91
  -1  10   6   29.96    2.81
   1 -10  -6   26.83    2.75
   1 -10  -6   21.56    2.72
  -1 -10   6   20.98    2.57
  -1 -10   6   25.02    2.60
  -1 -10   6   21.90    2.71
  -1  10   7   98.75    6.34
   1 -10  -7   88.67    6.23
   1 -10  -7   93.74    6.31
   1 -10  -7   87.28    6.32
  -1 -10   7   89.56    6.33
  -1 -10   7   85.51    6.31
  -1  10   8    1.67    2.05
   1 -10  -8    2.90    1.96
  -1 -10   8    4.09    2.12
   1 -10 -10  109.99    7.13
   1  10 -10   92.36    7.14
  -1 -10  10  105.53    7.03
   1 -10 -11  102.24    6.92
   1  10 -11   93.42    7.01
  -1 -10  11  102.04    6.84
   1 -10 -12  141.07    8.75
   1  10 -12  129.09    8.82
  -1 -10  12  118.73    8.62
   1 -10 -13    8.62    2.54
   1  10 -13    3.43    2.80
  -1 -10  13    5.96    2.40
   1 -10 -14   12.15    2.67
  -1 -10  14    7.65    2.41
   1 -10 -15   18.98    2.97
  -1 -10  15   18.86    2.65
   1 -10 -16    0.40    2.47
  -1 -10  16    1.94    2.23
   1 -10 -17   99.54    6.66
  -1 -10  17   88.29    6.48
  -1  11   1    1.82    2.22
   1 -11  -1    1.59    2.01
   1 -11  -1    1.50    1.76
   1 -11  -1    1.30    2.39
  -1 -11   1    0.15    1.96
  -1 -11   1    1.35    1.81
  -1  11   2    9.31    2.38
   1 -11  -2    9.41    2.04
   1 -11  -2    9.51    2.07
   1 -11  -2   11.01    2.57
  -1 -11   2    7.23    2.11
  -1  11   3   60.82    4.42
   1 -11  -3   58.67    4.25
   1 -11  -3   60.37    4.50
  -1 -11   3   58.09    4.36
  -1 -11   3   56.07    4.42
  -1 -11   3   48.09    4.20
  -1 -11   3   55.17    4.22
  -1  11   4   20.19    2.88
   1 -11  -4   20.37    2.49
   1 -11  -4   22.90    2.59
   1 -11  -4   27.53    2.87
  -1 -11   4   19.05    2.58
  -1 -11   4   22.12    2.75
  -1 -11   4   20.79    2.56
  -1 -11   4   23.47    2.66
  -1  11   5   92.12    6.28
   1 -11  -5   88.32    6.13
   1 -11  -5   92.27    6.16
  -1 -11   5   82.38    6.15
  -1  11   6   12.42    2.60
   1 -11  -6   13.56    2.53
   1 -11  -6   13.86    2.49
  -1 -11   6   17.04    2.33
  -1 -11   6   18.61    2.45
   1 -11  -7  104.12    6.98
   1 -11  -7   96.86    6.85
  -1 -11   7  100.62    6.86
   1 -11  -8   52.86    3.91
   1 -11  -8   41.95    3.84
   1 -11  -9   25.91    2.73
   1 -11  -9   15.77    2.58
   1  11  -9   14.37    2.68
  -1 -11   9   27.80    2.70
   1 -11 -10  230.41   13.55
   1  11 -10  185.82   13.58
   1 -11 -11    0.31    2.36
  -1 -11  11   -4.67    2.35
  -1 -11  12    4.65    2.43
   1 -11 -13   46.01    3.89
  -1 -11  13   41.57    3.83
   1 -11 -14   29.28    3.17
  -1 -11  14   28.61    3.03
   1 -11 -15   20.32    2.89
  -1 -11  15   22.66    2.75
   1 -11 -16   35.75    3.48
  -1 -11  16   37.16    3.42
   1 -12  -1   30.03    2.68
   1 -12  -1   28.79    3.12
  -1 -12   1   26.20    2.84
  -1 -12   1   25.07    2.63
   1 -12  -2  136.63    8.67
   1 -12  -2  136.61    8.86
  -1 -12   2  128.91    8.67
  -1 -12   2  124.45    8.64
   1 -12  -3   14.52    2.36
  -1 -12   3    9.80    2.24
  -1 -12   3   15.52    2.30
   1 -12  -4   59.16    4.66
   1 -12  -4   66.22    4.81
  -1 -12   4   62.05    4.65
  -1 -12   4   61.98    4.64
   1 -12  -5   24.46    2.91
  -1 -12   5   21.38    2.69
   1 -12  -6  209.83   14.05
  -1 -12   6  213.34   14.53
  -1 -12   6  225.98   14.02
   1 -12  -7  142.94    8.49
   1 -12  -7  112.96    8.43
  -1 -12   7  121.97    8.40
   1 -12  -8   31.15    3.32
  -1 -12   8   36.71    3.28
   1 -12  -9   10.07    2.47
  -1 -12   9    9.94    2.39
   1 -12 -10  232.71   14.81
  -1 -12  10  225.12   14.75
   1 -12 -11    4.39    2.30
  -1 -12  11    2.61    2.42
   1 -12 -12   65.47    4.74
  -1 -12  12   54.97    4.68
   1 -12 -13    0.16    2.35
  -1 -12  13    0.90    2.38
   1 -12 -14   68.27    5.16
   1 -12 -15   13.38    2.60
   1 -13  -1   10.33    2.62
   1 -13  -2   35.02    3.34
  -1 -13   2   29.75    2.98
   1 -13  -3   25.36    2.90
   1 -13  -3   31.02    3.15
  -1 -13   3   24.84    2.81
  -1 -13   3   22.84    2.75
   1 -13  -4   34.71    3.12
   1 -13  -4   28.95    3.26
  -1 -13   4   26.47    3.03
  -1 -13   4   30.12    2.98
   1 -13  -5    0.65    2.20
  -1 -13   5   -0.96    2.19
   1 -13  -6    2.40    2.24
  -1 -13   6    2.36    2.25
   1 -13  -7    7.41    2.38
  -1 -13   7    9.28    2.39
   1 -13  -8   10.17    2.54
  -1 -13   9   29.12    3.08
   1 -13 -10   62.89    4.83
  -1 -13  10   56.00    4.67
   1 -13 -11    1.36    2.40
  -1 -13  11    0.20    2.38
   1 -13 -12    1.43    2.49
  -1 -13  12    3.98    2.46
   1 -13 -13    0.46    2.39
  -1 -13  13   -4.30    2.37
  -1 -13  14    7.29    2.39
   1 -14  -1   55.95    4.80
  -1 -14   1   65.57    4.67
  -1 -14   2   27.53    2.95
   1 -14  -6   36.45    3.37
  -1 -14   6   32.82    3.31
   1 -14  -7  154.96    9.91
  -1 -14   7  143.21    9.86
   1 -14  -8    7.56    2.40
  -1 -14   8    8.94    2.41
   1 -14  -9   56.53    4.19
  -1 -14   9   44.20    4.20
   1 -14 -10   15.29    2.81
  -1 -14  10   14.88    2.72
   1 -14 -11    0.48    2.47
  -1 -14  11  -10.21    2.51
   1 -14 -12   -0.65    2.48
  -1 -14  12    1.57    2.35
   0   0   2 5799.55  354.71
   0   0   2 6022.36  354.74
   0   0   2 5215.35  354.75
   0   0   2 5540.93  354.72
   0   0  -2 5979.77  354.83
   0   0  -2 5946.89  354.80
   0   0  -2 5225.65  355.00
   0   0  -2 5582.01  355.11
   0   0   3    0.37    1.00
   0   0   3    0.44    1.00
   0   0   3    0.40    1.03
   0   0  -3    0.01    0.92
   0   0  -3    0.20    1.00
   0   0  -3    0.79    1.33
   0   0   4  406.14   25.67
   0   0   4  414.38   25.68
   0   0   4  409.75   25.67
   0   0  -4  408.93   25.68
   0   0  -4  412.16   25.68
   0   0  -4  398.67   25.73
   0   0   5    0.07    1.21
   0   0  -5    0.73    1.10
   0   0  -5   -0.47    1.12
   0   0  -5   -3.33    1.67
   0   0   6   23.64    2.00
   0   0   6   23.94    2.09
   0   0   6   27.32    2.11
   0   0  -6   23.42    2.38
   0   0   7    0.45    1.23
   0   0   7    0.38    1.35
   0   0   7   -3.47    1.34
   0   0  -7    0.84    1.29
   0   0  -7    0.35    1.22
   0   0  -7    2.92    1.64
   0   0   8 4369.62  272.68
   0   0  -8 4341.79  272.69
   0   0   9   -0.68    1.44
   0   0   9    1.27    1.48
   0   0  -9    0.26    1.50
   0   0  -9    0.44    1.54
   0   0  -9   -2.13    1.73
   0   0  10 1734.29  110.99
   0   0  10 1786.38  110.89
   0   0 -10 1795.45  110.92
   0   0 -10 1792.07  110.91
   0   0 -10 1735.72  111.03
   0   0  11    0.08    1.71
   0   0  11    1.68    1.77
   0   0  11   -1.36    1.76
   0   0 -11    1.78    1.60
   0   0 -11    0.03    1.73
   0   0 -11    2.78    2.00
   0   0  12    6.12    1.90
   0   0  12    6.15    1.95
   0   0  12    4.71    1.89
   0   0 -12    5.41    1.83
   0   0 -12    8.29    1.92
   0   0  13    0.13    1.83
   0   0 -13    0.21    2.10
   0   0 -13    0.10    2.04
   0   0 -13    0.42    2.30
   0   0  14   11.60    2.17
   0   0  14   15.73    2.40
   0   0  14   15.54    2.27
   0   0 -14   12.26    2.65
   0   0  15   -1.60    2.00
   0   0  15    0.23    2.21
   0   0  15   -2.93    2.09
   0   0 -15   -1.78    2.09
   0   0 -15    0.76    2.20
   0   0 -15   -1.66    2.56
   0   0  16   18.77    2.60
   0   0 -16   20.74    2.49
   0   0 -16   17.70    2.50
   0   0 -16   19.82    2.90
   0   0  17   -1.38    2.18
   0   0 -17    1.94    2.61
   0   0 -18   60.46    4.92
   0   0  19    1.01    2.18
   0   0 -19    0.72    2.75
   0   0  20   42.85    3.67
   0   0 -20   41.20    4.01
   0   0  21    0.17    2.26
   0   0 -21   -0.80    2.75
   0   0  22    0.40    2.31
   0   0 -22   -0.06    2.73
   0   1   2   28.85    1.96
   0   1   2   26.12    1.99
   0   1   2   28.11    1.90
   0  -1  -2   26.38    1.97
   0  -1  -2   27.15    1.96
   0  -1  -2   28.07    2.11
   0  -1  -2   27.50    1.87
   0   1  -2   28.38    2.00
   0   1  -2   29.32    2.02
   0   1  -2   29.02    2.00
   0   1  -2   24.63    1.98
   0  -1   2   27.45    1.97
   0  -1   2   28.75    1.97
   0  -1   2   28.15    2.00
   0   1   3   25.97    1.90
   0   1   3   22.01    1.89
   0   1   3   22.35    1.79
   0  -1  -3   26.96    1.89
   0  -1  -3   25.75    1.92
   0  -1  -3   23.51    2.04
   0  -1  -3   23.41    1.79
   0   1  -3   23.16    1.90
   0   1  -3   24.99    1.95
   0   1  -3   26.09    2.00
   0  -1   3   25.39    1.91
   0  -1   3   25.86    1.90
   0  -1   3   22.66    1.92
   0  -1   3   26.86    1.99
   0   1   4 2360.97  157.92
   0   1   4 2486.96  157.09
   0   1   4 2515.06  157.02
   0  -1  -4 2586.26  157.09
   0  -1  -4 2421.00  156.93
   0   1  -4 2584.23  157.14
   0   1  -4 2543.43  157.12
   0   1  -4 2521.94  157.18
   0  -1   4 2569.82  156.97
   0  -1   4 2478.38  156.92
   0  -1   4 2481.02  157.18
   0   1   5   10.72    1.42
   0   1   5   11.35    1.38
   0   1   5   10.88    1.25
   0  -1  -5   10.47    1.26
   0  -1  -5   10.46    1.31
   0   1  -5   10.24    1.33
   0   1  -5   11.11    1.37
   0   1  -5    8.03    1.54
   0  -1   5    9.74    1.31
   0  -1   5    9.20    1.38
   0   1   6  109.57    6.83
   0   1   6  106.62    6.80
   0  -1  -6  103.81    6.88
   0   1  -6   96.38    6.85
   0  -1   6  104.27    6.78
   0  -1   6  106.39    6.79
   0  -1   6  104.06    6.80
   0   1   7   98.58    6.35
   0   1   7  102.63    6.34
   0  -1  -7   94.01    6.31
   0  -1  -7   97.45    6.31
   0  -1  -7   96.35    6.42
   0   1  -7   94.84    6.35
   0   1  -7   97.52    6.32
   0   1  -7   92.18    6.41
   0  -1   7   91.63    6.30
   0  -1   7   99.31    6.33
   0  -1   7   97.88    6.36
   0   1   8   84.53    5.34
   0  -1  -8   80.14    5.49
   0   1  -8   81.13    5.53
   0  -1   8   76.86    5.38
   0   1   9   26.49    2.35
   0   1   9   30.30    2.42
   0   1   9   28.34    2.28
   0  -1  -9   25.96    2.35
   0  -1  -9   26.16    2.40
   0  -1  -9   22.93    2.56
   0   1  -9   29.46    2.44
   0   1  -9   30.15    2.44
   0   1  -9   25.65    2.69
   0  -1   9   28.51    2.30
   0  -1   9   25.38    2.40
   0  -1   9   24.62    2.38
   0   1  10   35.12    2.62
   0   1  10   30.85    2.69
   0   1  10   30.49    2.57
   0  -1 -10   35.67    2.66
   0  -1 -10   36.38    2.70
   0  -1 -10   38.88    2.95
   0   1 -10   27.48    2.66
   0   1 -10   26.85    2.74
   0  -1  10   24.15    2.59
   0  -1  10   28.59    2.76
   0  -1  10   27.56    2.60
   0   1  11   70.29    5.02
   0   1  11   78.07    5.08
   0   1  11   73.66    4.99
   0  -1 -11   73.71    5.05
   0  -1 -11   77.53    5.08
   0  -1 -11   71.31    5.20
   0   1 -11   75.97    5.09
   0   1 -11   71.00    5.10
   0   1 -11   64.45    5.14
   0  -1  11   72.47    5.04
   0  -1  11   64.49    5.10
   0  -1  11   75.00    5.03
   0   1  12  392.70   26.16
   0   1  12  424.37   26.07
   0   1  12  414.21   26.01
   0  -1 -12  458.67   26.10
   0  -1 -12  432.62   26.05
   0  -1 -12  417.96   26.09
   0   1 -12  407.16   26.05
   0   1 -12  410.68   26.06
   0   1 -12  390.30   26.07
   0  -1  12  395.52   26.01
   0  -1  12  384.74   26.01
   0   1  13    2.41    1.93
   0  -1 -13    3.23    1.97
   0  -1 -13    3.73    2.04
   0  -1 -13    0.74    2.51
   0   1 -13    2.49    2.05
   0   1 -13    4.19    1.97
   0   1 -13    1.06    2.27
   0  -1  13    3.91    1.95
   0   1  14   41.25    3.36
   0   1  14   33.25    3.45
   0   1  14   38.94    3.38
   0  -1 -14   44.95    3.50
   0  -1 -14   46.99    3.45
   0   1 -14   40.56    3.38
   0   1 -14   35.96    3.40
   0   1 -14   36.35    3.78
   0  -1  14   39.40    3.40
   0  -1  14   40.50    3.45
   0  -1  14   41.03    3.43
   0   1  15   17.97    2.41
   0   1  15   23.35    2.67
   0   1  15   19.39    2.47
   0  -1 -15   20.69    2.48
   0  -1 -15   22.10    2.58
   0   1 -15   16.86    2.44
   0   1 -15   17.15    2.49
   0   1 -15   16.31    2.95
   0  -1  15   20.18    2.49
   0  -1  15   20.80    2.67
   0  -1  15   15.66    2.47
   0  -1 -16    2.80    2.43
   0  -1  16    0.46    2.09
   0   1  17   42.32    3.56
   0  -1 -17   41.16    3.85
   0   1 -17   39.52    3.93
   0  -1  17   42.41    3.55
   0   1  18   14.52    2.40
   0  -1 -18   10.41    2.76
   0  -1  18   12.65    2.45
   0   1  19    6.08    2.31
   0  -1 -19    6.67    2.84
   0   1 -19    6.28    2.74
   0  -1  19    6.07    2.33
   0   1  20   67.10    5.25
   0  -1 -20   74.94    5.48
   0   1 -20   70.95    5.50
   0  -1  20   74.12    5.24
   0   1 -21    3.31    2.77
   0  -1  21    2.01    2.23
   0   1  22   15.56    2.61
   0  -1 -22   23.72    3.13
   0   1 -22   17.91    3.09
   0  -1  22   18.41    2.64
   0   2   0 7717.81  447.10
   0   2   0 6637.82  446.68
   0   2   0 6863.67  452.52
   0  -2   0 7407.40  447.12
   0  -2   0 7127.61  446.79
   0  -2   0 7035.01  447.81
   0   2   1   60.38    3.81
   0   2   1   54.62    3.80
   0  -2  -1   59.49    3.80
   0  -2  -1   57.49    3.82
   0  -2  -1   53.64    3.74
   0   2  -1   63.05    3.89
   0   2  -1   54.63    3.74
   0   2  -1   57.42    3.84
   0  -2   1   61.70    3.87
   0  -2   1   61.26    3.77
   0  -2   1   58.70    3.84
   0   2   2  286.79   18.04
   0   2   2  267.88   18.00
   0  -2  -2  288.30   18.04
   0  -2  -2  279.71   18.06
   0  -2  -2  272.25   17.98
   0   2  -2  321.16   18.68
   0   2  -2  307.39   18.58
   0   2  -2  297.05   18.04
   0  -2   2  307.75   18.14
   0  -2   2  301.88   18.15
   0  -2   2  293.27   18.28
   0  -2   2  285.18   18.07
   0   2   3    0.84    1.14
   0   2   3    0.53    0.91
   0  -2  -3    1.79    1.21
   0  -2  -3    1.24    1.39
   0  -2  -3    0.87    0.80
   0   2  -3    1.60    1.15
   0   2  -3    0.38    1.29
   0   2  -3    2.33    1.05
   0  -2   3    1.04    1.21
   0  -2   3    2.05    1.20
   0  -2  -4  169.15   11.12
   0  -2  -4  171.60   11.02
   0   2  -4  177.81   11.05
   0   2  -4  177.70   11.06
   0   2  -4  171.00   11.06
   0   2   5  422.19   26.78
   0   2   5  406.03   26.71
   0  -2  -5  407.73   26.80
   0   2  -5  445.53   26.84
   0   2  -5  448.28   26.84
   0   2  -5  429.66   26.83
   0  -2   5  431.44   26.81
   0  -2   5  427.41   26.80
   0  -2   5  427.43   26.81
   0   2   6   14.08    1.66
   0  -2  -6   14.60    1.52
   0  -2  -6   13.96    1.58
   0   2  -6   14.57    1.66
   0   2  -6   13.66    1.61
   0  -2   6   14.30    1.47
   0  -2   6   14.96    1.61
   0  -2   6   12.85    1.72
   0   2   7    9.92    1.59
   0   2   7    9.81    1.39
   0  -2  -7    9.60    1.42
   0  -2  -7   11.54    1.59
   0  -2  -7    9.55    1.91
   0   2  -7   10.72    1.59
   0   2  -7   10.17    1.61
   0  -2   7    8.32    1.52
   0  -2   7   10.18    1.50
   0  -2   7   10.41    1.70
   0   2   8  433.65   27.95
   0   2   8  429.89   27.91
   0  -2  -8  452.16   27.97
   0  -2  -8  455.62   27.99
   0  -2  -8  434.86   28.01
   0   2  -8  452.70   28.00
   0   2  -8  469.12   28.02
   0  -2   8  422.12   27.97
   0  -2   8  425.46   27.96
   0  -2   8  471.98   28.00
   0   2   9   76.69    5.33
   0  -2  -9   80.83    5.40
   0  -2  -9   86.25    5.47
   0  -2  -9   82.77    5.55
   0   2  -9   78.79    5.46
   0   2  -9   81.45    5.45
   0   2  -9   77.93    5.52
   0  -2   9   79.79    5.42
   0   2  10  846.75   53.21
   0   2  10  853.59   51.81
   0   2  10  807.84   51.75
   0  -2 -10  856.48   51.87
   0   2 -10  847.03   51.90
   0  -2  10  771.39   51.75
   0  -2  10  815.93   51.79
   0  -2  10  829.01   51.82
   0   2  11    7.96    1.90
   0   2  11    7.07    1.77
   0  -2 -11    9.39    1.73
   0  -2 -11    9.13    1.82
   0  -2 -11    6.80    2.19
   0   2 -11    7.51    1.84
   0   2 -11    8.41    1.86
   0   2 -11    8.65    2.20
   0  -2  11    6.16    1.72
   0  -2  11    4.97    1.96
   0  -2  11    7.99    1.86
   0   2  12   23.90    2.60
   0   2  12   27.57    2.45
   0  -2 -12   27.30    2.50
   0  -2 -12   26.19    2.55
   0  -2 -12   25.20    2.86
   0   2 -12   27.43    2.60
   0   2 -12   25.13    2.59
   0   2 -12   28.68    2.95
   0  -2  12   20.81    2.42
   0  -2  12   18.15    2.63
   0  -2  12   21.31    2.51
   0   2  13   27.92    2.97
   0   2  13   29.77    2.80
   0  -2 -13   35.77    3.00
   0  -2 -13   32.68    2.95
   0  -2 -13   27.55    3.08
   0   2 -13   32.42    2.94
   0   2 -13   30.19    2.91
   0   2 -13   29.25    3.10
   0  -2  13   29.62    2.82
   0   2  14  167.62   10.59
   0  -2 -14  169.48   10.58
   0  -2 -14  176.18   10.58
   0  -2 -14  171.48   10.64
   0   2 -14  161.64   10.59
   0   2 -14  153.95   10.55
   0   2 -14  163.95   10.64
   0  -2  14  149.13   10.48
   0  -2  14  138.77   10.55
   0   2  15   66.23    5.07
   0   2  15   68.48    4.91
   0  -2 -15   72.06    5.01
   0  -2 -15   72.56    5.02
   0   2 -15   69.57    5.02
   0   2 -15   68.93    5.02
   0   2 -15   61.23    5.13
   0  -2  15   65.38    4.98
   0  -2  15   66.68    5.04
   0   2  16   57.09    4.41
   0  -2  16   59.38    4.40
   0   2  17   13.64    2.43
   0  -2 -17   10.38    2.63
   0   2 -17   12.18    2.94
   0  -2  17   15.38    2.40
   0   2  18   42.22    3.77
   0  -2 -18   41.62    4.06
   0   2 -18   49.90    4.15
   0  -2  18   47.24    3.78
   0   2  19    4.68    2.32
   0  -2 -19   12.74    2.70
   0   2 -19    9.97    2.87
   0  -2  19    7.06    2.32
   0  -2 -20   36.67    3.66
   0   2 -20   37.68    3.73
   0  -2  20   33.94    3.36
   0   2  21    9.74    2.37
   0  -2 -21    8.42    2.85
   0   2  22   27.36    3.03
   0   2 -22   30.27    3.50
   0   3   0    0.95    1.30
   0  -3   0    0.16    1.29
   0  -3   0   -1.19    1.01
   0  -3   0   -0.09    1.12
   0   3   1  936.05   58.31
   0  -3  -1  907.91   58.31
   0  -3  -1  868.95   58.23
   0  -3  -1  838.03   59.74
   0  -3  -1  855.84   58.53
   0   3  -1 1040.95   58.60
   0  -3   1 1034.24   58.39
   0  -3   1  958.69   58.33
   0  -3   1  926.97   58.29
   0  -3  -2 1186.45   72.50
   0  -3  -2 1106.43   72.52
   0  -3   2 1279.31   72.85
   0  -3   2 1113.13   72.46
   0   3   3   19.70    1.77
   0   3   3   19.26    1.59
   0  -3  -3   21.94    1.76
   0  -3  -3   18.19    1.87
   0  -3   3   21.40    1.93
   0  -3   3   20.34    1.62
   0  -3   3   19.63    1.85
   0   3   4  197.51   12.20
   0   3   4  169.21   12.11
   0  -3  -4  186.57   12.23
   0   3  -4  204.45   12.31
   0   3  -4  216.05   12.37
   0   3  -4  193.17   12.38
   0  -3   4  194.72   12.22
   0  -3   4  196.64   12.24
   0  -3   4  195.95   12.24
   0   3   5   50.22    3.45
   0   3   5   57.05    3.35
   0  -3  -5   51.45    3.51
   0  -3  -5   46.03    3.46
   0  -3  -5   47.11    3.60
   0   3  -5   46.65    3.50
   0   3  -5   50.35    3.57
   0  -3   5   49.54    3.48
   0  -3   5   50.12    3.52
   0  -3   5   46.86    3.59
   0   3   6    8.16    1.30
   0  -3  -6    7.48    1.44
   0  -3  -6    8.30    1.42
   0  -3  -6    7.53    1.72
   0   3  -6    6.43    1.48
   0   3  -6    6.94    1.69
   0  -3   6    7.55    1.41
   0  -3   6    7.57    1.48
   0   3   7   76.50    4.86
   0  -3  -7   66.55    5.04
   0   3  -7   73.00    5.00
   0  -3   7   76.45    5.01
   0   3   8    8.92    1.63
   0   3   8    9.61    1.40
   0  -3  -8    9.18    1.56
   0  -3  -8    7.74    1.77
   0   3  -8    9.16    1.81
   0   3  -8    8.26    1.75
   0   3  -8    8.22    1.80
   0  -3   8    8.78    1.54
   0  -3   8    8.49    1.70
   0  -3   8    6.95    1.69
   0   3   9  481.70   29.16
   0   3   9  448.72   29.06
   0  -3  -9  485.49   29.14
   0  -3  -9  460.71   29.13
   0   3  -9  467.97   29.19
   0   3  -9  463.98   29.19
   0   3  -9  457.28   29.16
   0  -3   9  460.00   29.13
   0  -3   9  436.20   29.11
   0  -3   9  460.82   29.13
   0   3  10  603.68   37.20
   0   3  10  569.98   37.10
   0  -3 -10  602.63   37.17
   0  -3 -10  616.93   37.19
   0  -3 -10  602.94   37.23
   0   3 -10  607.50   37.27
   0   3 -10  594.01   37.24
   0   3 -10  584.69   37.24
   0  -3  10  562.81   37.17
   0  -3  10  566.75   37.16
   0  -3  10  590.39   37.17
   0   3  11   87.85    5.55
   0   3  11   78.54    5.44
   0  -3 -11   83.54    5.48
   0  -3 -11   81.85    5.56
   0  -3 -11   78.98    5.65
   0   3 -11   82.82    5.63
   0   3 -11   79.26    5.57
   0   3 -11   85.06    5.69
   0  -3  11   74.94    5.52
   0  -3  11   71.76    5.55
   0  -3  11   77.98    5.52
   0   3  12  181.20   11.68
   0  -3 -12  195.31   11.69
   0  -3 -12  191.49   11.68
   0  -3 -12  192.55   11.76
   0   3 -12  180.71   11.71
   0   3 -12  170.24   11.69
   0   3 -12  191.77   11.76
   0  -3  12  159.57   11.62
   0  -3  12  170.09   11.68
   0  -3  12  174.18   11.63
   0   3  13   37.85    3.24
   0   3  13   38.10    3.11
   0  -3 -13   39.53    3.45
   0   3 -13   34.75    3.25
   0   3 -13   34.08    3.30
   0   3 -13   35.57    3.39
   0  -3  13   34.33    3.12
   0  -3  13   35.30    3.30
   0  -3  13   37.15    3.21
   0   3  14   31.96    3.07
   0   3  14   31.62    2.96
   0  -3 -14   33.89    2.99
   0  -3 -14   32.85    3.03
   0  -3 -14   31.42    3.27
   0   3 -14   33.21    3.10
   0   3 -14   31.35    3.07
   0   3 -14   29.31    3.32
   0  -3  14   31.05    3.04
   0  -3  14   31.28    3.27
   0  -3  14   29.39    2.97
   0   3  15   14.49    2.38
   0  -3 -15   17.16    2.36
   0  -3 -15   16.10    2.37
   0  -3 -15   15.53    2.65
   0   3 -15   15.88    2.56
   0   3 -15   11.54    2.40
   0   3 -15   16.19    2.87
   0  -3  15   15.16    2.31
   0   3  16   44.24    3.72
   0  -3 -16   46.03    3.98
   0   3 -16   49.48    4.24
   0   3  17  106.48    6.96
   0  -3 -17  105.13    7.11
   0   3 -17  106.65    7.29
   0  -3  17   92.42    6.91
   0   3 -18   40.52    4.07
   0  -3  18   42.69    3.64
   0   3  19   11.54    2.39
   0  -3 -19   10.64    2.75
   0   3 -19   15.84    2.92
   0  -3  19   12.80    2.40
   0   3  20  134.38    9.24
   0  -3 -20  142.60    9.36
   0   3 -20  131.87    9.47
   0  -3  20  146.72    9.28
   0   3  21    2.14    2.24
   0  -3 -21    2.35    2.63
   0   3 -21   -7.56    2.76
   0  -3  21    1.26    2.24
   0   3 -22   44.31    4.21
   0   4   0    4.36    1.46
   0  -4   0    3.47    1.39
   0  -4   0    3.49    1.25
   0   4   1  134.08    8.54
   0  -4  -1  137.01    8.52
   0  -4  -1  129.62    8.48
   0  -4  -1  128.85    8.53
   0   4  -1  135.03    8.57
   0  -4   1  136.30    8.54
   0  -4   1  129.16    8.47
   0  -4   1  136.03    8.53
   0   4   2  163.97    9.80
   0   4  -2  157.99   10.01
   0  -4   2  145.18    9.70
   0  -4   2  151.47    9.79
   0   4   3   31.78    2.23
   0   4   3   27.91    1.97
   0  -4  -3   24.77    2.14
   0  -4  -3   29.15    2.26
   0  -4   3   25.04    2.18
   0  -4   3   26.10    2.29
   0  -4   3   24.25    2.28
   0  -4   3   24.39    2.02
   0  -4   3   27.47    2.23
   0   4   4   71.63    4.49
   0   4   4   64.81    4.37
   0  -4  -4   66.20    4.46
   0  -4  -4   66.62    4.53
   0  -4   4   65.79    4.53
   0  -4   4   70.33    4.55
   0  -4   4   67.82    4.58
   0  -4   4   62.24    4.50
   0   4   5  189.12   11.24
   0   4   5  157.63   11.14
   0  -4  -5  179.99   11.23
   0  -4  -5  184.52   11.28
   0   4  -5  176.30   11.52
   0   4  -5  177.95   11.50
   0   4  -5  184.31   11.36
   0  -4   5  170.64   11.25
   0  -4   5  167.97   11.25
   0  -4   5  186.22   11.27
   0  -4  -6   54.04    3.86
   0  -4  -6   51.00    3.86
   0  -4  -6   60.25    3.97
   0   4  -6   55.57    3.83
   0  -4   6   55.02    3.88
   0   4   7   78.50    5.22
   0   4   7   81.62    5.08
   0  -4  -7   79.33    5.25
   0  -4  -7   79.98    5.22
   0  -4  -7   75.12    5.29
   0   4  -7   73.86    5.26
   0   4  -7   79.93    5.30
   0   4  -7   76.79    5.20
   0  -4   7   72.44    5.20
   0  -4   7   69.58    5.24
   0  -4   7   80.08    5.23
   0   4   8   36.77    2.87
   0   4   8   35.33    2.69
   0  -4  -8   38.40    2.90
   0  -4  -8   37.83    2.91
   0  -4  -8   40.21    3.08
   0   4  -8   34.62    2.97
   0   4  -8   32.66    3.06
   0   4  -8   36.38    2.97
   0   4   9   63.52    4.27
   0  -4  -9   63.79    4.39
   0   4  -9   59.20    4.34
   0  -4   9   49.25    4.15
   0  -4   9   58.15    4.27
   0  -4   9   66.44    4.31
   0   4  10  623.47   38.26
   0   4  10  605.96   38.18
   0  -4 -10  634.19   38.27
   0  -4 -10  586.90   38.24
   0  -4 -10  620.14   38.33
   0   4 -10  615.90   38.36
   0   4 -10  614.42   38.37
   0   4 -10  592.59   38.28
   0  -4  10  573.69   38.24
   0  -4  10  584.57   38.24
   0  -4  10  635.32   38.30
   0   4  11   98.87    6.44
   0   4  11   98.66    6.30
   0  -4 -11   94.96    6.36
   0  -4 -11   96.65    6.44
   0   4 -11   88.74    6.45
   0   4 -11   95.53    6.54
   0   4 -11   98.06    6.54
   0  -4  11   90.71    6.47
   0  -4  11   88.98    6.42
   0  -4  11   92.70    6.42
   0   4  12   25.48    2.49
   0  -4 -12   26.38    2.69
   0  -4 -12   26.56    2.80
   0  -4 -12   24.39    2.96
   0   4 -12   25.06    2.89
   0   4 -12   28.03    2.88
   0  -4  12   27.44    2.69
   0   4  13   -1.82    2.06
   0   4  13    1.75    1.87
   0  -4 -13    1.19    1.88
   0  -4 -13   -3.73    2.11
   0  -4 -13    0.88    2.23
   0   4 -13    0.21    2.43
   0  -4  13    2.36    2.14
   0  -4  13   -0.53    2.20
   0  -4  13    0.80    2.05
   0   4  14  249.49   16.34
   0   4  14  253.56   16.25
   0  -4 -14  266.96   16.35
   0  -4 -14  274.36   16.37
   0  -4 -14  266.27   16.40
   0   4 -14  256.48   16.41
   0   4 -14  251.81   16.41
   0   4 -14  261.63   16.40
   0  -4  14  234.62   16.31
   0  -4  14  226.83   16.31
   0  -4  14  261.47   16.33
   0   4  15    7.25    2.13
   0  -4 -15   10.56    2.24
   0  -4 -15    8.71    2.14
   0  -4 -15    6.87    2.35
   0   4 -15    7.58    2.23
   0   4 -15    4.82    2.34
   0   4 -15    8.42    2.60
   0  -4  15    7.36    2.17
   0   4  16   59.76    4.77
   0  -4 -16   68.66    5.02
   0   4 -16   64.41    5.18
   0  -4  16   70.33    4.84
   0   4  17   10.00    2.23
   0  -4 -17   12.15    2.54
   0   4 -17   10.56    2.97
   0  -4  17   11.98    2.27
   0   4  18   58.76    4.42
   0  -4 -18   56.81    4.54
   0   4  19   11.05    2.46
   0  -4 -19   23.95    2.84
   0   4 -19   14.36    3.02
   0  -4  19   13.94    2.51
   0  -4  20   32.09    3.18
   0  -4 -21    0.00    2.39
   0   4 -21    1.71    2.80
   0  -4  21    1.89    2.20
   0   5   0   -1.46    1.46
   0  -5   0    0.72    1.37
   0  -5   0   -3.48    1.16
   0   5   1  519.30   30.50
   0  -5  -1  453.06   30.46
   0  -5  -1  481.01   30.43
   0  -5  -1  481.96   30.50
   0   5  -1  513.61   30.61
   0  -5   1  473.81   30.47
   0  -5   1  483.03   30.44
   0   5   2 1154.23   70.67
   0  -5  -2 1128.13   70.60
   0  -5  -2 1061.54   71.41
   0   5  -2 1193.07   71.56
   0  -5   2 1111.87   70.65
   0  -5   2 1083.87   70.57
   0  -5   2 1174.12   70.67
   0   5   3    8.49    1.60
   0  -5  -3    9.86    1.49
   0  -5  -3   12.32    1.55
   0  -5   3   11.59    1.58
   0  -5   3   10.84    1.61
   0  -5   3   10.91    1.60
   0  -5   3   10.08    1.27
   0  -5   3   10.83    1.56
   0   5   4    4.13    1.49
   0   5   4    1.53    1.00
   0  -5  -4    3.68    1.45
   0  -5  -4    4.47    1.43
   0  -5   4    3.15    1.50
   0  -5   4    2.12    1.05
   0  -5   4    3.45    1.47
   0   5   5  175.69   12.05
   0  -5  -5  199.51   12.18
   0  -5   5  199.10   12.18
   0  -5   5  189.71   12.18
   0  -5   5  190.71   12.28
   0  -5   5  196.42   12.16
   0   5   6    6.95    1.60
   0   5   6    7.93    1.35
   0  -5  -6    8.97    1.65
   0  -5  -6    8.06    1.71
   0   5  -6    8.70    1.49
   0  -5   6    7.56    1.67
   0  -5   6    5.77    1.56
   0  -5   6   10.83    1.74
   0   5   7   12.23    1.74
   0  -5  -7   13.79    1.80
   0  -5  -7   14.12    1.82
   0  -5  -7   12.62    1.92
   0   5  -7   12.17    1.86
   0   5  -7   10.13    1.88
   0   5  -7   10.47    1.76
   0  -5   7   13.47    1.92
   0   5   8  148.33    9.39
   0   5   8  153.34    9.28
   0  -5  -8  148.35    9.42
   0   5  -8  144.73    9.39
   0  -5   8  130.54    9.37
   0  -5   8  130.51    9.38
   0  -5   8  152.37    9.41
   0   5   9   22.22    2.42
   0   5   9   22.29    2.12
   0  -5  -9   23.70    2.26
   0  -5  -9   25.56    2.27
   0  -5  -9   26.30    2.56
   0   5  -9   20.72    2.57
   0   5  -9   24.82    2.53
   0   5  -9   22.42    2.57
   0  -5   9   20.26    2.36
   0  -5   9   24.83    2.48
   0  -5   9   20.29    2.43
   0   5  10  602.33   36.47
   0   5  10  560.92   36.36
   0  -5 -10  616.22   36.50
   0  -5 -10  604.12   36.44
   0  -5 -10  597.88   36.48
   0   5 -10  563.80   36.64
   0   5 -10  567.81   36.67
   0  -5  10  531.43   36.40
   0  -5  10  546.66   36.43
   0  -5  10  597.12   36.49
   0   5  11    9.59    1.83
   0  -5 -11   10.98    1.99
   0  -5 -11    9.06    2.19
   0  -5 -11    9.37    2.24
   0   5 -11    8.00    2.15
   0   5 -11    9.33    2.27
   0   5 -11   10.20    2.33
   0  -5  11   15.62    2.21
   0  -5  11    8.92    2.23
   0   5  12  114.98    7.92
   0   5  12  123.12    7.77
   0  -5 -12  123.88    7.98
   0   5 -12  119.01    8.01
   0  -5  12  113.14    7.94
   0  -5  12  109.90    7.88
   0  -5  12  120.73    7.91
   0   5  13   48.21    3.83
   0   5  13   45.75    3.61
   0  -5 -13   51.87    3.69
   0  -5 -13   57.62    3.90
   0   5 -13   43.55    3.86
   0   5 -13   42.55    3.89
   0   5 -13   53.95    4.11
   0  -5  13   47.00    3.81
   0  -5  13   37.45    3.72
   0  -5  13   40.07    3.73
   0   5  14    0.00    1.97
   0  -5 -14   -0.55    1.86
   0  -5 -14    1.80    2.14
   0  -5 -14    0.40    2.21
   0   5 -14    1.19    2.11
   0   5 -14    2.80    2.32
   0   5 -14   -7.22    2.60
   0  -5  14    0.83    2.23
   0  -5  14    0.85    2.23
   0  -5  14    2.56    2.02
   0   5  15   -1.67    2.02
   0  -5 -15    0.58    2.25
   0   5 -15    0.39    2.55
   0  -5  15    1.38    2.06
   0   5  16   30.89    3.07
   0  -5 -16   33.21    3.21
   0   5 -16   26.88    3.54
   0  -5  16   36.52    3.11
   0   5  17   -2.28    2.21
   0  -5 -17    1.16    2.37
   0   5 -17    0.49    2.73
   0  -5  17    1.13    2.15
   0   5  18   28.83    3.07
   0  -5 -18   32.14    3.22
   0   5 -18   25.02    3.57
   0  -5  18   31.49    3.06
   0  -5 -19    6.47    2.43
   0   5 -19    2.08    2.95
   0  -5  19    6.53    2.26
   0  -5 -20   66.93    5.12
   0   6   0 2303.24  142.29
   0  -6   0 2197.71  142.13
   0  -6   0 2262.25  142.27
   0  -6   0 2333.60  142.30
   0   6   1   36.44    2.87
   0  -6  -1   33.10    2.73
   0  -6  -1   36.57    2.72
   0  -6  -1   38.28    2.74
   0   6  -1   37.42    2.91
   0  -6   1   34.51    2.79
   0  -6   1   36.25    2.62
   0  -6   1   35.70    2.80
   0  -6  -2  893.71   53.60
   0  -6  -2  879.16   53.59
   0   6  -2  873.54   54.15
   0  -6   2  828.67   53.57
   0  -6   2  830.34   53.52
   0  -6   2  833.82   53.57
   0  -6  -3   32.42    2.60
   0  -6   3   31.74    2.71
   0  -6   3   37.43    2.74
   0  -6   3   32.60    2.46
   0  -6  -4   77.46    4.92
   0  -6   4   70.54    4.96
   0  -6   4   72.95    4.99
   0  -6   4   69.34    4.80
   0  -6   4   71.87    4.89
   0   6   5   88.86    5.69
   0  -6  -5   87.64    5.74
   0  -6   5   78.41    5.81
   0  -6   5   85.89    5.75
   0   6   6   32.53    2.71
   0   6   6   33.72    2.41
   0  -6  -6   31.87    2.71
   0   6  -6   30.38    2.49
   0  -6   6   29.88    2.68
   0  -6   6   31.40    2.71
   0  -6   6   31.48    2.71
   0   6   7  258.33   15.46
   0   6   7  232.50   15.33
   0  -6  -7  245.51   15.40
   0  -6  -7  248.32   15.47
   0  -6   7  233.47   15.44
   0  -6   7  234.97   15.44
   0  -6   7  235.41   15.57
   0  -6   7  249.92   15.46
   0   6   8  238.41   14.47
   0   6   8  226.93   14.38
   0  -6  -8  237.68   14.64
   0  -6  -8  232.23   14.43
   0  -6  -8  235.02   14.50
   0   6  -8  213.18   14.45
   0  -6   8  213.19   14.47
   0  -6   8  208.32   14.46
   0  -6   8  219.20   14.68
   0  -6   8  234.37   14.48
   0   6   9   23.74    2.31
   0   6   9   21.96    2.16
   0  -6  -9   21.85    2.27
   0  -6  -9   20.21    2.25
   0  -6  -9   19.67    2.45
   0   6  -9   16.94    2.53
   0  -6   9   18.60    2.34
   0  -6   9   20.19    2.50
   0  -6   9   19.40    2.32
   0  -6   9   24.57    2.44
   0   6  10  445.26   30.31
   0  -6 -10  527.21   30.58
   0  -6 -10  503.23   30.44
   0  -6 -10  503.66   30.47
   0   6 -10  465.67   31.13
   0   6 -10  481.74   31.15
   0   6 -10  487.91   30.47
   0  -6  10  462.25   30.43
   0  -6  10  452.37   30.43
   0  -6  10  501.69   30.47
   0   6  11    5.05    1.95
   0   6  11    4.68    1.85
   0  -6 -11    6.22    2.12
   0   6 -11    6.60    2.05
   0   6 -11    5.60    2.17
   0   6 -11    6.91    2.38
   0  -6  11    6.82    2.02
   0  -6  11    6.72    2.13
   0  -6  11    8.56    2.17
   0   6  12    3.80    2.18
   0  -6 -12    6.00    1.95
   0  -6 -12    4.69    2.21
   0  -6 -12    3.16    2.14
   0   6 -12    5.30    2.20
   0   6 -12    4.46    2.24
   0   6 -12    3.62    2.46
   0  -6  12    5.41    2.18
   0  -6  12    2.93    2.27
   0  -6  12    2.60    2.24
   0   6  13    6.05    2.26
   0   6  13    1.44    1.99
   0  -6 -13    1.67    1.85
   0  -6 -13    1.97    2.13
   0  -6 -13    2.51    2.22
   0   6 -13    3.85    2.03
   0   6 -13    1.38    2.25
   0   6 -13    1.87    2.49
   0  -6  13    1.10    2.19
   0  -6  13    3.25    2.18
   0   6  14    4.86    2.11
   0  -6 -14    8.28    2.24
   0   6 -14    6.10    2.70
   0  -6  14    4.28    2.22
   0   6  15   65.99    4.90
   0   6 -15   71.00    5.19
   0  -6  15   65.17    4.92
   0   6  16    0.98    2.22
   0   6 -16   -0.13    2.65
   0  -6  16    0.79    2.13
   0  -6 -17    1.21    2.48
   0   6 -17    3.19    2.77
   0  -6  17    2.11    2.23
   0  -6 -18   28.79    3.07
   0   6 -18   19.49    3.40
   0  -6  18   23.69    2.80
   0  -6 -19   16.78    2.85
   0  -6  19   17.82    2.55
   0  -6 -20    0.35    2.41
   0  -6  20    1.93    2.24
   0  -7   0    0.89    1.52
   0  -7   0   -0.95    1.36
   0  -7   0   -2.45    1.57
   0   7   1   35.78    2.83
   0  -7  -1   29.61    2.66
   0  -7  -1   33.41    2.54
   0  -7  -1   34.93    2.65
   0   7  -1   33.20    2.84
   0  -7   1   29.42    2.72
   0  -7   1   30.54    2.46
   0  -7   1   32.66    2.64
   0   7   2  727.11   42.26
   0  -7  -2  694.21   42.22
   0  -7  -2  710.02   42.19
   0  -7  -2  659.45   42.22
   0   7  -2  708.89   42.72
   0  -7   2  658.52   42.22
   0  -7   2  611.57   42.11
   0  -7   2  648.53   42.18
   0   7   3   10.81    1.84
   0  -7  -3    4.85    1.57
   0  -7  -3    8.61    1.69
   0  -7  -3    9.99    1.45
   0  -7   3    6.49    1.74
   0  -7   3   11.16    1.74
   0  -7   3    6.76    1.70
   0  -7   3    8.25    1.70
   0   7   4  684.21   39.92
   0  -7  -4  655.31   39.84
   0  -7   4  617.49   40.05
   0  -7   4  622.92   40.09
   0  -7   4  587.54   39.97
   0  -7   4  628.97   39.87
   0   7   5   32.82    2.63
   0  -7  -5   32.23    2.58
   0  -7  -5   31.14    2.70
   0  -7   5   29.57    2.65
   0  -7   5   29.46    2.81
   0  -7   5   28.83    2.69
   0  -7   5   28.91    2.47
   0   7   6  712.97   43.20
   0  -7  -6  702.56   43.19
   0  -7  -6  675.92   43.17
   0  -7   6  662.05   43.22
   0  -7   6  652.85   43.21
   0  -7   6  660.87   43.24
   0  -7   6  732.20   43.23
   0   7   7    2.49    1.90
   0   7   7    0.89    1.40
   0  -7  -7   -2.48    1.65
   0   7  -7   -2.77    1.59
   0  -7   7    1.23    1.79
   0  -7   7    0.64    1.85
   0  -7   7    1.51    1.77
   0  -7   7    0.77    1.96
   0   7   8  132.09    7.85
   0   7   8  112.59    7.59
   0  -7  -8  121.17    7.74
   0  -7  -8  117.17    7.77
   0   7  -8  115.36    7.74
   0  -7   8  110.28    7.76
   0  -7   8  116.22    7.82
   0  -7   8  111.83    7.86
   0  -7   8  116.91    7.78
   0   7   9   55.55    4.09
   0  -7  -9   64.24    4.35
   0  -7  -9   60.49    4.34
   0  -7  -9   58.46    4.37
   0   7  -9   56.73    4.35
   0  -7   9   57.27    4.55
   0  -7   9   57.56    4.36
   0   7  10   50.89    3.75
   0  -7 -10   45.36    3.80
   0   7 -10   46.47    3.80
   0  -7  10   42.11    3.68
   0  -7  10   40.64    3.79
   0  -7  10   46.43    3.90
   0  -7  10   46.87    3.78
   0   7  11   34.57    3.31
   0   7  11   37.58    3.07
   0  -7 -11   40.54    3.18
   0  -7 -11   38.53    3.29
   0  -7 -11   33.66    3.28
   0   7 -11   33.60    3.45
   0  -7  11   32.96    3.23
   0  -7  11   39.70    3.38
   0  -7  11   33.32    3.54
   0  -7  11   39.18    3.32
   0   7  12  403.62   24.87
   0   7  12  381.38   24.77
   0  -7 -12  421.94   24.90
   0  -7 -12  428.98   24.90
   0  -7 -12  427.08   24.93
   0  -7  12  345.78   24.80
   0  -7  12  365.58   24.84
   0  -7  12  345.89   25.26
   0  -7  12  399.83   24.82
   0   7  13    1.28    2.00
   0  -7 -13    0.21    2.22
   0   7 -13   -0.29    2.41
   0  -7  13    0.64    1.99
   0   7  14  193.94   13.04
   0  -7 -14  213.73   13.18
   0   7 -14  189.60   13.18
   0  -7  14  212.24   13.11
   0  -7 -15   63.67    4.84
   0   7 -15   61.83    4.93
   0  -7  15   61.81    4.74
   0  -7 -16    0.47    2.45
   0   7 -16   -0.11    2.57
   0  -7 -17    4.45    2.54
   0  -7  17    7.46    2.30
   0  -7  18    4.44    2.14
   0  -7 -19    1.86    2.62
   0  -7  19    0.83    2.21
   0   8   0 1105.91   65.17
   0  -8   0  985.15   64.96
   0  -8   0 1035.24   64.99
   0   8   1    1.12    1.96
   0  -8  -1    0.51    1.49
   0  -8  -1    0.50    1.55
   0  -8  -1    0.06    1.74
   0   8  -1   -1.16    1.88
   0  -8   1   -2.16    1.51
   0  -8   1   -1.64    1.74
   0   8   2  316.07   18.79
   0  -8  -2  307.06   18.70
   0  -8  -2  300.76   18.69
   0   8  -2  288.70   18.96
   0  -8   2  275.42   18.70
   0  -8   2  285.69   18.64
   0  -8   2  290.94   18.69
   0   8   3   45.91    3.63
   0  -8  -3   46.84    3.34
   0  -8  -3   47.92    3.43
   0  -8  -3   40.44    3.28
   0  -8   3   42.57    3.64
   0  -8   3   44.67    3.54
   0  -8   3   43.39    3.44
   0  -8   3   42.98    3.21
   0  -8   3   49.97    3.43
   0   8   4    2.36    1.91
   0  -8  -4    0.06    1.49
   0  -8  -4    2.91    1.83
   0  -8  -4    2.12    1.34
   0  -8   4    1.77    1.83
   0  -8   4    1.46    1.98
   0  -8   4    0.30    1.65
   0  -8   4    2.69    1.49
   0  -8   4    1.05    1.80
   0   8   5   59.36    4.41
   0  -8  -5   61.02    4.30
   0  -8  -5   66.61    4.37
   0  -8  -5   59.10    4.16
   0  -8   5   57.42    4.37
   0  -8   5   55.32    4.46
   0  -8   5   57.10    4.40
   0  -8   5   61.80    4.25
   0  -8   5   60.35    4.39
   0   8   6    0.78    1.75
   0  -8  -6   -1.12    1.68
   0  -8  -6    1.45    1.96
   0  -8   6    3.23    2.09
   0  -8   6    0.76    2.08
   0  -8   6    0.36    1.84
   0  -8   6    1.03    1.95
   0  -8  -7   47.08    3.16
   0  -8  -7   31.50    3.18
   0   8  -7   31.76    2.95
   0  -8   7   37.58    3.20
   0  -8   7   38.82    3.24
   0  -8   7   34.03    3.27
   0   8   8  127.53    8.56
   0  -8  -8  130.27    8.54
   0  -8  -8  129.05    8.57
   0   8  -8  122.55    8.49
   0  -8   8  134.90    8.59
   0   8   9   22.21    2.62
   0   8   9   22.19    2.12
   0  -8  -9   25.94    2.54
   0  -8  -9   22.89    2.55
   0   8  -9   18.08    2.59
   0  -8   9   17.12    2.57
   0  -8   9   18.61    2.75
   0  -8   9   19.93    2.78
   0  -8   9   20.52    2.60
   0   8  10  250.84   15.20
   0   8  10  219.10   15.02
   0  -8 -10  252.44   15.24
   0  -8 -10  255.74   15.14
   0  -8  10  213.80   15.13
   0  -8  10  216.61   15.14
   0  -8  10  233.88   15.31
   0  -8  10  246.39   15.14
   0   8  11   39.97    3.38
   0  -8 -11   49.32    3.60
   0  -8 -11   46.67    3.62
   0  -8 -11   51.64    3.74
   0   8 -11   39.78    3.77
   0  -8  11   42.94    3.79
   0  -8  11   37.38    3.78
   0  -8  11   39.53    3.92
   0  -8  11   45.94    3.72
   0   8  12   10.72    2.02
   0  -8 -12   10.97    2.44
   0  -8  12   13.58    2.35
   0  -8 -13    1.77    2.25
   0   8 -13    1.83    2.43
   0  -8  13    1.46    2.06
   0  -8 -14    4.89    2.39
   0   8 -14    5.97    2.55
   0  -8  14    3.43    2.08
   0  -8 -15   56.98    4.49
   0  -8  15   53.80    4.31
   0  -8 -16    0.47    2.39
   0  -8  16    0.69    2.16
   0  -8 -17    5.80    2.61
   0  -8  17    7.34    2.28
   0  -8 -18   16.95    2.77
   0   9   0    1.28    2.04
   0  -9   0    0.93    1.56
   0  -9   0    0.61    1.56
   0  -9   0    1.41    1.87
   0   9   1   86.86    5.44
   0  -9  -1   75.99    5.30
   0  -9  -1   71.58    5.29
   0  -9  -1   80.20    5.36
   0   9  -1   79.49    5.48
   0  -9   1   66.95    5.29
   0  -9   1   80.48    5.22
   0   9   2  210.02   13.04
   0  -9  -2  202.11   12.92
   0  -9  -2  206.31   12.90
   0   9  -2  203.24   13.20
   0  -9   2  190.99   12.94
   0  -9   2  188.12   12.83
   0  -9   2  210.80   12.91
   0   9   3   -2.45    2.20
   0  -9  -3   -0.88    1.66
   0  -9  -3    1.01    1.83
   0  -9  -3   -1.20    1.77
   0  -9   3   -3.13    1.95
   0  -9   3    1.71    1.98
   0  -9   3    0.98    1.95
   0  -9   3   -2.43    1.43
   0  -9   3    0.73    1.86
   0  -9  -4  125.45    7.50
   0  -9  -4  117.99    7.47
   0  -9  -4  109.61    7.38
   0  -9   4  109.86    7.59
   0  -9   4  110.17    7.62
   0  -9   4  101.07    7.50
   0  -9   4  109.43    7.39
   0  -9   4  114.05    7.48
   0   9   5    0.24    2.13
   0  -9  -5    0.94    1.89
   0  -9  -5    0.66    2.08
   0  -9  -5    0.11    1.53
   0  -9   5    0.23    2.04
   0  -9   5    1.45    1.60
   0  -9   5    0.64    1.94
   0   9   6   79.95    5.58
   0  -9  -6   86.15    5.55
   0  -9   6   72.69    5.58
   0  -9   6   72.22    5.64
   0  -9   6   80.45    5.50
   0   9   7   97.18    6.18
   0  -9  -7   97.02    6.16
   0  -9  -7   94.84    6.19
   0  -9  -7   82.13    6.00
   0   9  -7   81.88    6.08
   0  -9   7   85.91    6.19
   0  -9   7   91.94    6.23
   0  -9   7   82.33    6.30
   0  -9   7   91.36    6.20
   0   9   8   63.78    4.56
   0  -9  -8   69.32    4.61
   0  -9  -8   63.35    4.64
   0   9  -8   60.79    4.49
   0  -9   8   61.97    4.71
   0  -9   8   61.53    4.62
   0  -9   8   53.64    4.71
   0  -9   8   52.80    4.58
   0   9   9   75.58    5.10
   0  -9  -9   74.54    5.10
   0  -9  -9   76.10    5.09
   0  -9  -9   70.24    5.19
   0   9  -9   63.44    5.03
   0  -9   9   65.11    5.11
   0  -9   9   66.69    5.19
   0  -9   9   67.11    5.23
   0  -9   9   67.80    5.10
   0  -9 -10   52.74    3.97
   0  -9 -10   54.35    4.03
   0  -9 -10   49.32    4.07
   0   9 -10   44.92    4.06
   0  -9 -11   37.14    3.57
   0   9 -11   37.66    3.64
   0  -9  11   48.11    3.60
   0   9 -12  182.05   13.31
   0  -9  12  230.57   13.35
   0  -9 -13   -8.11    2.42
   0  -9  13    0.75    2.10
   0  -9 -14   56.77    4.39
   0  -9  14   50.55    4.13
   0  -9 -15   84.82    6.09
   0  -9  15   82.91    5.96
   0  -9 -16    0.24    2.33
   0  -9  16   -2.99    2.25
   0  -9 -17   18.89    2.82
   0  -9  17   19.23    2.67
   0  -9 -18   15.44    2.64
   0  -9  18   17.66    2.56
   0  10   0  372.70   22.55
   0 -10   0  336.75   22.28
   0 -10   0  353.90   22.32
   0  10   1    1.32    2.30
   0 -10  -1    0.92    1.87
   0 -10  -1    1.20    1.98
   0  10  -1    0.94    2.27
   0 -10   1    1.11    1.77
   0 -10   1    3.52    2.08
   0  10   2   57.60    4.68
   0 -10  -2   65.67    4.57
   0 -10  -2   70.26    4.59
   0  10  -2   57.42    4.86
   0 -10   2   59.80    4.45
   0 -10   2   64.09    4.57
   0  10   3  515.62   28.81
   0 -10  -3  482.57   28.69
   0 -10  -3  468.38   28.67
   0 -10  -3  478.80   28.64
   0 -10   3  456.78   29.21
   0 -10   3  453.90   29.17
   0 -10   3  428.60   28.68
   0 -10   3  382.67   28.53
   0  10   4    0.38    2.36
   0 -10  -4    0.48    1.96
   0 -10   4    0.39    2.29
   0 -10   4    0.11    2.30
   0 -10   4    1.35    2.24
   0 -10   4   -2.43    2.06
   0  10   5  664.52   38.36
   0 -10  -5  645.06   38.29
   0 -10  -5  660.63   38.30
   0 -10  -5  578.89   38.22
   0 -10   5  595.71   38.40
   0 -10   5  586.31   38.41
   0 -10   5  565.75   38.26
   0 -10   5  570.31   38.86
   0 -10   5  590.89   38.25
   0  10   6   41.54    3.49
   0 -10  -6   38.41    3.23
   0 -10  -6   41.80    3.34
   0 -10  -6   34.06    3.06
   0 -10   6   34.41    3.39
   0 -10   6   30.38    3.45
   0 -10   6   31.54    3.38
   0 -10   6   39.06    3.29
   0  10   7   10.00    2.31
   0 -10  -7    9.24    2.20
   0 -10  -7   10.83    2.39
   0 -10  -7    9.02    1.83
   0  10  -7    8.38    1.82
   0 -10   7   11.80    2.55
   0 -10   7    6.63    2.47
   0 -10   7    7.66    2.36
   0 -10   7    9.16    2.27
   0 -10  -8  206.67   12.55
   0 -10  -8  180.96   12.43
   0  10  -8  188.43   12.49
   0 -10   8  195.54   12.58
   0 -10   8  196.41   12.64
   0 -10   8  192.79   12.49
   0 -10  -9   45.11    3.54
   0  10  -9   35.78    3.42
   0 -10   9   39.86    3.51
   0 -10 -10   99.36    6.97
   0 -10  10  103.61    7.03
   0 -10 -11   44.66    3.87
   0 -10  11   50.04    3.95
   0 -10 -12    2.77    2.31
   0 -10  12    3.99    2.33
   0 -10 -13   54.34    4.40
   0 -10 -14   14.78    2.59
   0 -10  15   15.24    2.59
   0 -10  16   27.62    3.07
   0 -10 -17    1.88    2.43
   0 -10  17    0.86    2.28
   0  11   0    0.64    2.41
   0 -11   0    1.60    1.99
   0 -11   0   -3.72    1.80
   0 -11   0   -1.38    2.08
   0  11   1   18.41    2.84
   0 -11  -1   17.44    2.59
   0 -11  -1   17.65    2.32
   0 -11  -1   25.22    2.54
   0  11  -1   22.38    2.92
   0 -11   1   15.19    2.44
   0 -11   1   22.12    2.48
   0  11   2  104.32    6.84
   0 -11  -2   92.78    6.66
   0 -11  -2  102.69    6.65
   0  11  -2   95.65    7.06
   0 -11   2   90.16    6.70
   0 -11   2   99.59    6.53
   0 -11   2   95.90    6.68
   0  11   3   54.76    4.18
   0 -11  -3   53.84    4.04
   0 -11  -3   54.04    4.08
   0 -11  -3   53.16    4.01
   0 -11   3   49.81    4.22
   0 -11   3   52.23    4.20
   0 -11   3   47.18    4.08
   0 -11   3   44.98    3.85
   0 -11   3   57.62    4.12
   0 -11  -4   75.04    5.14
   0 -11  -4   67.77    5.08
   0 -11  -4   75.25    5.07
   0 -11   4   69.00    5.31
   0 -11   4   65.73    5.34
   0 -11   4   68.72    5.22
   0 -11   4   68.48    5.01
   0 -11   4   73.77    5.12
   0 -11  -5   10.95    2.25
   0 -11  -5   11.97    2.27
   0 -11  -5   10.19    2.15
   0 -11   5    9.24    2.35
   0 -11   5    8.42    2.57
   0 -11   5   10.29    2.46
   0 -11   5   10.28    2.00
   0 -11   5   15.07    2.37
   0 -11  -6   47.58    3.73
   0 -11  -6   41.28    3.53
   0  11  -7    1.81    1.71
   0 -11  -8   44.49    3.81
   0 -11   8   45.51    3.82
   0 -11  -9   45.60    3.69
   0 -11   9   37.43    3.59
   0 -11 -10  104.88    7.05
   0 -11  10   99.21    7.03
   0 -11 -11    4.41    2.20
   0 -11  11    1.30    2.25
   0 -11 -12   96.02    6.62
   0 -11  12   92.88    6.55
   0 -11 -13    5.10    2.27
   0 -11  13    1.79    2.24
   0 -11 -14    6.16    2.28
   0 -11  14    9.40    2.33
   0 -11 -15   10.56    2.39
   0 -11  15    9.14    2.50
   0 -11 -16   15.41    2.55
   0 -11  16   13.47    2.63
   0 -12   0   59.61    4.62
   0 -12   0   66.76    4.65
   0 -12  -1    4.19    2.01
   0 -12   1    0.56    2.00
   0 -12  -2    2.21    1.96
   0 -12  -2    1.69    2.06
   0 -12   2    1.00    1.85
   0 -12   2    0.53    2.24
   0 -12  -3   73.43    5.18
   0 -12  -3   70.57    5.08
   0 -12   3   67.40    5.06
   0 -12   3   73.40    5.18
   0 -12  -4    1.53    2.22
   0 -12   4    0.87    2.23
   0 -12   5  271.52   17.42
   0 -12  -6    4.92    2.18
   0 -12   6    7.46    2.32
   0 -12  -7   62.39    4.67
   0 -12   7   57.79    4.61
   0 -12  -8   98.88    6.87
   0 -12   8   97.25    6.80
   0 -12  -9    4.54    2.41
   0 -12  10    3.62    2.30
   0 -12  11    2.88    2.31
   0 -12 -12    3.56    2.40
   0 -12  12    5.12    2.34
   0 -12 -13   73.36    5.40
   0 -12  13   73.19    5.33
   0 -12 -14   21.12    2.98
   0 -12  14   31.01    3.06
   0 -12  15   44.33    3.89
   0 -13   0    0.63    2.08
   0 -13   0    0.93    2.12
   0 -13  -1   15.70    2.35
   0 -13  -1   15.17    2.34
   0 -13   1   15.85    2.43
   0 -13   1   16.24    2.52
   0 -13  -2   46.34    3.68
   0 -13   2   43.69    3.77
   0 -13   3   20.92    2.75
   0 -13  -5   14.48    2.50
   0 -13   5   13.78    2.59
   0 -13  -6   -0.55    2.22
   0 -13   6    0.48    2.30
   0 -13  -7    2.26    2.24
   0 -13   7    2.41    2.35
   0 -13  -8   24.64    2.92
   0 -13   8   24.69    2.95
   0 -13  -9   -0.74    2.41
   0 -13   9    6.01    2.37
   0 -13 -10    7.81    2.52
   0 -13  10    5.60    2.39
   0 -13 -11    7.54    2.65
   0 -13  11    8.38    2.40
   0 -13 -12   60.29    4.64
   0 -13  12   54.50    4.46
   0 -13 -13    4.79    2.48
   0 -13  13    7.37    2.31
   0 -14  -2   92.46    6.57
   0 -14   2   95.38    6.58
   0 -14  -3   -1.70    2.32
   0 -14   3    1.84    2.34
   0 -14  -4   25.28    2.86
   0 -14   4   24.04    2.94
   0 -14  -5   17.17    2.72
   0 -14   5   16.24    2.66
   0 -14  -6   44.32    3.60
   0 -14   6   32.87    3.55
   0 -14  -7   54.46    4.45
   0 -14   7   55.71    4.44
   0 -14   9    3.58    2.39
   0 -14 -10   36.73    3.40
   0 -14  10   34.39    3.43
   0 -14 -11    2.41    2.29
   0 -14  11   -2.33    2.31
   0 -14 -12   30.62    3.09
   0 -14  12   27.66    3.06
   0 -15  -6    6.73    2.45
   0 -15   6    9.00    2.52
   0 -15  -7   27.72    3.07
   0 -15   7   26.12    3.08
   0 -15  -8   64.70    4.64
   0 -15   8   52.48    4.59
   0 -15  -9    0.84    2.33
   0 -15   9    0.09    2.37
   0 -15 -10    0.41    2.40
   0 -15  10    0.22    2.32
   1   0   0  235.08   15.57
   1   0   0  227.93   15.56
   1   0   0  251.69   15.64
   1   0   0  244.99   15.65
  -1   0   0  279.24   15.60
  -1   0   0  274.50   15.60
  -1   0   0  254.98   15.64
  -1   0   0  235.87   15.68
   1   0   1    0.35    0.58
   1   0   1    0.90    0.60
   1   0   1    0.11    0.72
   1   0   1    0.38    0.91
  -1   0  -1    0.30    0.58
  -1   0  -1    0.53    0.59
  -1   0  -1    0.08    0.74
   1   0   2 5404.61  315.87
   1   0   2 5643.24  315.91
   1   0   2 4509.29  315.48
   1   0   2 5201.88  315.91
  -1   0  -2 5215.99  315.81
  -1   0  -2 5563.30  315.95
  -1   0  -2 4432.92  315.49
  -1   0  -2 4867.11  316.26
   1   0   3    0.99    1.07
  -1   0  -3   -3.59    0.78
  -1   0  -3   -1.33    0.78
  -1   0  -3   -0.08    1.09
   1   0   4  128.23    7.95
   1   0   4  130.00    7.96
   1   0   4  130.20    7.97
  -1   0  -4  109.66    7.94
   1   0   5    0.25    1.11
   1   0   5    0.02    1.38
   1   0   5   -3.54    1.22
  -1   0  -5    0.25    1.02
  -1   0  -5    0.95    1.14
  -1   0  -5    0.88    1.31
   1   0   6  894.72   56.45
   1   0   6  889.19   56.44
  -1   0  -6  959.21   56.46
  -1   0  -6  906.93   56.41
  -1   0  -6  854.55   56.42
   1   0   7   -1.54    1.27
   1   0   7    0.46    1.56
   1   0   7    1.56    1.38
  -1   0  -7   -4.08    1.20
  -1   0  -7    0.19    1.22
  -1   0  -7    0.17    1.51
   1   0   8  400.94   25.33
   1   0   8  385.38   25.32
   1   0   8  410.71   25.30
  -1   0  -8  412.45   25.32
  -1   0  -8  395.96   25.30
   1   0   9    0.86    1.56
   1   0   9    0.98    1.68
   1   0   9    0.01    1.54
  -1   0  -9    0.68    1.43
  -1   0  -9    0.31    1.36
   1   0  10  298.76   18.67
   1   0  10  296.82   18.68
   1   0  10  280.76   18.59
  -1   0 -10  306.57   18.66
  -1   0 -10  299.85   18.64
  -1   0 -10  279.64   18.65
   1   0  11   -0.32    1.84
   1   0  11    1.01    1.87
   1   0  11    1.05    1.75
  -1   0 -11    0.03    1.44
  -1   0 -11    0.49    1.53
  -1   0 -11    0.99    2.05
   1   0  12  640.57   41.29
   1   0  12  625.85   41.18
   1   0  12  672.74   41.17
  -1   0 -12  671.50   41.23
  -1   0 -12  660.45   41.22
  -1   0 -12  647.10   41.19
   1   0  13    0.97    2.14
   1   0  13   -4.87    2.19
   1   0  13   -1.63    1.89
  -1   0 -13   -2.55    1.83
  -1   0 -13    0.93    1.73
  -1   0 -13    1.05    2.33
   1   0  14  177.20   11.69
   1   0  14  175.03   11.64
   1   0  14  185.46   11.52
  -1   0 -14  176.45   11.60
  -1   0 -14  174.64   11.62
  -1   0 -14  174.03   11.60
  -1   0 -15   -3.08    2.50
   1   0  16    9.15    2.27
  -1   0 -16    9.31    2.71
   1   0  17   -3.20    2.19
   1   0  18    6.27    2.32
  -1   0 -18    2.24    2.60
   1   0  19    1.90    2.26
  -1   0 -19   -3.48    2.70
   1   0  20   57.05    4.80
  -1   0 -20   72.80    5.10
   1   0  21    0.07    2.25
  -1   0 -21    0.00    2.55
   1   0  22   47.94    4.13
  -1   0 -22   55.69    4.44
   1   1   0 1543.21  101.47
   1   1   0 1684.43  101.58
   1   1   0 1656.39  101.51
  -1  -1   0 1545.95  101.50
  -1  -1   0 1539.75  101.44
  -1   1   0 1784.41  102.00
   1  -1   0 1689.26  101.53
   1  -1   0 1719.69  102.00
   1  -1   0 1579.76  102.23
   1   1   1  154.13   10.30
   1   1   1  156.21   10.36
   1   1   1  157.18   10.35
  -1  -1  -1  162.13   10.32
  -1  -1  -1  152.45   10.35
  -1   1  -1  188.78   10.43
  -1   1  -1  194.15   10.45
  -1   1  -1  167.34   10.28
   1  -1   1  185.77   10.35
   1  -1   1  184.50   10.36
   1  -1   1  145.76   10.26
   1  -1   1  162.39   10.46
   1   1   2 1068.18   69.25
   1   1   2 1123.50   69.24
  -1  -1  -2 1142.55   69.63
  -1  -1  -2 1115.85   69.30
  -1  -1  -2  995.89   69.21
  -1  -1  -2 1033.47   69.33
  -1   1  -2 1282.56   69.45
  -1   1  -2 1294.13   69.46
  -1   1  -2  968.91   69.22
   1  -1   2 1192.88   69.35
   1  -1   2 1166.59   69.34
   1  -1   2 1107.30   69.38
   1   1   3  148.01    9.57
   1   1   3  146.23    9.45
  -1  -1  -3  168.15    9.45
  -1  -1  -3  171.35    9.45
  -1  -1  -3  131.93    9.47
  -1  -1  -3  139.89    9.41
  -1   1  -3  162.90    9.47
  -1   1  -3  169.79    9.48
  -1   1  -3  126.17    9.40
   1  -1   3  152.01    9.45
   1  -1   3  155.63    9.47
   1  -1   3  128.37    9.40
   1  -1   3  153.67    9.54
   1   1   4 2429.37  152.08
   1   1   4 2561.12  151.18
   1   1   4 2595.89  151.27
  -1  -1  -4 2195.34  150.91
  -1   1  -4 2159.24  150.86
   1  -1   4 2542.05  151.05
   1  -1   4 2505.05  151.02
   1  -1   4 2541.23  151.12
   1   1   5  940.77   59.49
   1   1   5  941.42   59.20
   1   1   5  933.19   59.15
  -1  -1  -5  958.31   59.15
  -1  -1  -5  957.91   59.15
  -1  -1  -5  863.15   59.14
  -1   1  -5  961.62   59.22
  -1   1  -5  960.02   59.22
   1  -1   5  967.74   59.19
   1  -1   5  961.42   59.18
   1  -1   5  950.57   59.24
   1   1   6 1799.49  110.25
   1   1   6 1762.34  109.70
  -1  -1  -6 1684.73  109.53
  -1  -1  -6 1794.71  109.57
  -1  -1  -6 1586.08  109.61
  -1   1  -6 1739.57  109.72
  -1   1  -6 1775.66  109.74
   1  -1   6 1819.96  109.62
   1  -1   6 1821.81  109.61
   1  -1   6 1765.57  109.65
   1   1   7    8.46    1.52
   1   1   7    6.50    1.49
   1   1   7    7.76    1.36
  -1  -1  -7    7.43    1.40
  -1  -1  -7    5.82    1.33
  -1  -1  -7    8.85    1.69
  -1   1  -7    6.32    1.29
  -1   1  -7    6.10    1.42
  -1   1  -7    6.77    1.57
   1  -1   7    7.06    1.45
   1  -1   7    6.11    1.47
   1  -1   7    7.77    1.51
   1   1   8  378.90   23.07
   1   1   8  360.64   22.94
   1   1   8  363.95   22.89
  -1  -1  -8  374.93   22.93
  -1  -1  -8  370.39   22.92
  -1  -1  -8  342.75   22.93
  -1   1  -8  353.49   22.93
  -1   1  -8  369.07   22.95
  -1   1  -8  344.62   22.91
   1  -1   8  365.63   22.92
   1  -1   8  372.32   22.94
   1   1   9   63.05    4.37
   1   1   9   63.14    4.44
   1   1   9   63.93    4.29
  -1  -1  -9   59.15    4.32
  -1  -1  -9   65.02    4.32
  -1  -1  -9   56.90    4.41
  -1   1  -9   64.21    4.33
  -1   1  -9   63.66    4.35
  -1   1  -9   62.06    4.41
   1  -1   9   61.76    4.39
   1  -1   9   64.07    4.45
   1   1  10  695.74   42.89
   1   1  10  688.17   42.65
   1   1  10  705.67   42.57
  -1  -1 -10  717.67   42.64
  -1  -1 -10  692.83   42.60
  -1  -1 -10  646.99   42.60
  -1   1 -10  658.15   42.62
  -1   1 -10  678.53   42.64
  -1   1 -10  632.84   42.55
   1  -1  10  660.09   42.61
   1  -1  10  652.94   42.62
   1  -1  10  700.76   42.59
   1   1  11   18.31    2.30
   1   1  11   18.49    2.42
   1   1  11   21.92    2.20
  -1  -1 -11   19.54    2.08
  -1  -1 -11   20.05    2.11
  -1   1 -11   20.89    2.07
  -1   1 -11   19.72    2.07
  -1   1 -11   19.79    2.51
   1  -1  11   19.25    2.22
   1  -1  11   19.43    2.45
   1  -1  11   12.91    2.26
   1   1  12   15.88    2.33
   1   1  12   17.97    2.45
   1   1  12   15.65    2.22
  -1  -1 -12   17.26    2.54
  -1   1 -12   18.58    2.14
  -1   1 -12   18.49    2.09
  -1   1 -12   18.69    2.59
   1  -1  12   20.31    2.40
   1  -1  12   13.08    2.34
   1  -1  12   18.87    2.25
   1   1  13   36.42    3.28
   1   1  13   37.41    3.43
  -1  -1 -13   42.40    3.21
  -1  -1 -13   38.04    3.13
  -1  -1 -13   33.97    3.43
  -1   1 -13   40.22    3.19
  -1   1 -13   38.52    3.14
  -1   1 -13   40.23    3.44
   1  -1  13   40.10    3.41
   1  -1  13   31.25    3.38
   1  -1  13   38.18    3.30
   1   1  14   43.10    3.53
  -1  -1 -14   46.05    3.48
  -1  -1 -14   46.20    3.56
  -1  -1 -14   40.74    3.77
  -1   1 -14   40.07    3.49
  -1   1 -14   40.87    3.52
  -1   1 -14   40.45    3.77
   1  -1  14   41.48    3.62
   1  -1  14   44.74    3.75
   1  -1  14   41.95    3.54
   1   1  15   26.47    2.77
  -1  -1 -15   23.99    3.07
   1  -1  15   23.80    2.74
  -1  -1 -16   72.87    5.43
   1  -1  16   73.05    5.26
   1   1  17    6.96    2.27
  -1  -1 -17    4.12    2.61
  -1   1 -17    5.11    2.60
   1   1  18  140.03    9.89
  -1  -1 -18  155.28   10.02
  -1   1 -18  153.04   10.08
   1  -1  18  153.49    9.91
  -1  -1 -19    2.15    2.59
  -1   1 -19    0.88    2.67
   1  -1  19    2.52    2.26
   1   1  20   24.26    3.02
  -1  -1 -20   33.62    3.35
   1  -1  20   29.60    3.13
   1   1  21    2.50    2.33
  -1  -1 -21    2.14    2.68
  -1   1 -21    6.49    2.65
   1  -1  21    1.34    2.35
  -1   1 -22    0.96    2.59
   1   2   0  453.14   28.21
  -1  -2   0  424.01   28.20
  -1  -2   0  449.74   28.25
  -1  -2   0  433.71   28.17
  -1   2   0  458.64   28.24
  -1   2   0  461.20   28.24
   1  -2   0  484.34   28.23
  -1  -2  -1  658.06   40.70
  -1  -2  -1  620.73   40.70
   1  -2   1  723.58   40.89
   1  -2   1  603.94   40.88
   1   2   2 1803.69  115.99
   1   2   2 1780.51  115.96
  -1   2  -2 1981.88  118.21
  -1   2  -2 1985.61  118.20
   1  -2   2 1924.64  116.13
   1  -2   2 1943.01  116.15
   1  -2   2 1797.32  116.20
   1   2   3   80.51    4.94
   1   2   3   70.65    4.81
  -1  -2  -3   71.23    4.97
  -1  -2  -3   73.61    4.82
   1  -2   3   79.90    4.97
   1  -2   3   79.07    4.97
   1  -2   3   78.71    4.88
   1  -2   3   76.59    5.06
   1   2   4  763.42   48.39
   1   2   4  760.78   48.30
  -1  -2  -4  782.29   48.63
  -1  -2  -4  785.90   48.42
  -1  -2  -4  699.68   48.39
  -1  -2  -4  767.14   48.36
  -1   2  -4  821.27   48.46
  -1   2  -4  813.16   48.46
  -1   2  -4  700.82   48.33
   1  -2   4  800.96   48.45
   1  -2   4  788.42   48.44
   1  -2   4  833.91   48.47
   1  -2   4  776.29   48.41
   1   2   5  147.28    9.30
   1   2   5  143.47    9.20
  -1  -2  -5  158.25    9.28
  -1  -2  -5  151.57    9.26
  -1  -2  -5  131.60    9.30
  -1   2  -5  149.89    9.30
  -1   2  -5  151.96    9.31
  -1   2  -5  127.87    9.22
   1  -2   5  142.50    9.28
   1  -2   5  153.65    9.30
   1  -2   5  140.78    9.30
   1   2   6  555.96   34.30
   1   2   6  532.47   34.21
  -1  -2  -6  567.32   34.31
  -1  -2  -6  539.98   34.28
  -1  -2  -6  509.18   34.28
  -1   2  -6  562.09   34.35
  -1   2  -6  548.37   34.33
  -1   2  -6  517.07   34.27
   1  -2   6  578.00   34.32
   1  -2   6  545.66   34.29
   1  -2   6  563.90   34.35
   1   2   7   22.71    1.84
  -1  -2  -7   21.78    1.87
  -1  -2  -7   22.43    1.98
  -1  -2  -7   17.73    2.09
  -1   2  -7   21.45    1.92
  -1   2  -7   21.46    1.96
  -1   2  -7   20.36    2.02
   1  -2   7   19.03    2.09
   1   2   8  200.19   12.30
   1   2   8  197.48   12.22
  -1  -2  -8  182.50   12.30
  -1   2  -8  191.14   12.29
  -1   2  -8  185.31   12.28
  -1   2  -8  179.74   12.26
   1  -2   8  200.29   12.30
   1  -2   8  195.42   12.28
   1  -2   8  196.79   12.31
   1   2   9   46.49    3.64
   1   2   9   48.76    3.48
  -1  -2  -9   45.81    3.54
  -1  -2  -9   51.78    3.54
  -1  -2  -9   46.30    3.67
  -1   2  -9   49.68    3.55
  -1   2  -9   51.08    3.57
  -1   2  -9   46.34    3.66
   1  -2   9   53.03    3.62
   1  -2   9   51.47    3.63
   1  -2   9   47.42    3.61
   1   2  10  116.19    7.33
  -1  -2 -10  110.44    7.39
  -1  -2 -10  110.31    7.36
  -1  -2 -10  106.96    7.44
  -1   2 -10  106.74    7.44
   1  -2  10  120.01    7.43
  -1  -2 -11   19.30    2.10
  -1  -2 -11   24.73    2.19
  -1  -2 -11   18.55    2.56
  -1   2 -11   17.62    2.11
  -1   2 -11   21.45    2.28
  -1   2 -11   20.66    2.55
   1   2  12  528.74   33.40
   1   2  12  547.13   33.34
  -1  -2 -12  542.99   33.42
  -1   2 -12  522.36   33.38
   1  -2  12  497.41   33.37
   1  -2  12  507.59   33.41
   1  -2  12  549.02   33.37
   1   2  13  156.24   10.32
   1   2  13  163.96   10.19
  -1  -2 -13  177.28   10.28
  -1  -2 -13  163.47   10.24
  -1   2 -13  153.50   10.25
  -1   2 -13  152.34   10.26
   1  -2  13  147.96   10.25
   1  -2  13  139.87   10.33
   1  -2  13  150.36   10.21
   1   2  14  104.12    7.26
  -1  -2 -14  115.95    7.41
  -1  -2 -14  111.21    7.37
  -1  -2 -14  106.25    7.44
  -1   2 -14  109.22    7.38
  -1   2 -14  103.46    7.36
  -1   2 -14  108.55    7.43
   1  -2  14  107.34    7.30
   1   2  15   55.92    4.34
  -1  -2 -15   54.67    4.57
  -1   2 -15   58.73    4.64
   1  -2  15   60.37    4.39
   1   2  16   19.36    2.69
  -1  -2 -16   24.50    2.92
  -1   2 -16   26.27    3.02
   1  -2  16   23.44    2.70
   1   2  17    0.73    2.11
  -1  -2 -17    4.23    2.57
  -1   2 -17   -3.84    2.62
   1  -2  17   -2.25    2.18
   1   2  18    1.93    2.24
  -1  -2 -18    7.83    2.61
  -1   2 -18    9.29    2.70
   1  -2  18    4.28    2.27
   1   2  19    0.91    2.23
  -1  -2 -19   -2.09    2.48
   1   2  20   31.38    3.46
  -1   2 -20   41.32    3.84
   1  -2  20   41.15    3.48
  -1  -2 -21   38.85    3.64
  -1   2 -21   33.57    3.58
   1  -2  21   31.18    3.34
   1   3   0 1043.46   63.31
   1   3   0 1003.71   63.26
  -1  -3   0 1039.78   63.30
  -1  -3   0 1057.24   63.36
  -1   3   0 1093.14   63.39
  -1   3   0  951.60   63.25
   1  -3   0 1068.46   63.34
   1  -3   0  924.69   63.27
   1  -3   0  952.54   64.39
   1   3   1  228.49   14.29
  -1  -3  -1  229.98   14.31
  -1  -3  -1  234.77   14.17
  -1   3  -1  247.51   14.48
  -1   3  -1  200.82   14.15
   1  -3   1  247.73   14.32
   1  -3   1  233.64   14.17
   1  -3   1  219.01   14.36
   1   3   2  833.36   47.28
  -1  -3  -2  692.53   47.06
  -1  -3  -2  712.25   47.08
   1  -3   2  857.19   47.59
   1  -3   2  868.54   47.63
   1  -3   2  887.14   47.56
   1   3   3   98.16    5.82
   1   3   3   81.81    5.64
  -1  -3  -3   91.01    5.78
  -1  -3  -3   87.52    5.87
  -1  -3  -3   89.69    5.65
  -1   3  -3   82.82    5.68
  -1   3  -3   87.69    5.66
   1  -3   3  100.44    5.87
   1  -3   3  105.00    5.89
   1  -3   3   98.58    6.01
   1  -3   3   93.09    5.92
   1   3   4   49.07    3.30
   1   3   4   47.69    3.04
  -1  -3  -4   46.09    3.24
  -1  -3  -4   43.31    3.03
  -1   3  -4   49.04    3.30
  -1   3  -4   51.81    3.32
  -1   3  -4   43.32    3.09
  -1   3  -4   46.73    3.09
   1  -3   4   47.20    3.29
   1  -3   4   45.15    3.34
   1  -3   4   44.55    3.40
   1   3   5   19.75    1.84
   1   3   5   18.58    1.52
  -1  -3  -5   19.71    1.79
  -1  -3  -5   18.69    1.84
  -1   3  -5   20.38    1.89
  -1   3  -5   20.58    1.86
  -1   3  -5   18.35    1.72
   1  -3   5   20.45    1.91
   1  -3   5   20.99    1.99
   1  -3   5   19.01    1.95
   1   3   6   89.44    5.94
   1   3   6   89.20    5.83
  -1  -3  -6   98.35    5.99
  -1  -3  -6   93.37    5.95
  -1  -3  -6   87.23    6.04
  -1   3  -6   92.36    6.00
  -1   3  -6   93.52    6.01
  -1   3  -6   94.31    5.94
   1  -3   6   84.20    6.01
   1  -3   6   81.12    6.00
   1  -3   6   96.71    6.03
   1   3   7   11.15    1.44
   1   3   7    9.82    1.30
  -1  -3  -7   10.40    1.42
  -1  -3  -7   12.24    1.52
  -1  -3  -7   10.96    1.79
  -1   3  -7   12.18    1.61
  -1   3  -7    9.72    1.61
   1  -3   7   13.12    1.52
   1  -3   7   13.49    1.66
   1  -3   7   11.44    1.79
   1   3   8  337.76   20.70
  -1  -3  -8  341.38   20.66
  -1  -3  -8  322.49   20.65
  -1  -3  -8  321.31   20.68
  -1   3  -8  304.25   20.62
   1  -3   8  324.87   20.68
   1  -3   8  323.76   20.66
   1  -3   8  339.66   20.70
   1   3   9   18.63    2.20
   1   3   9   17.08    1.83
  -1  -3  -9   16.99    1.87
  -1  -3  -9   18.60    1.95
  -1  -3  -9   16.30    2.18
  -1   3  -9   17.24    1.89
  -1   3  -9   15.09    2.09
  -1   3  -9   16.26    2.08
   1  -3   9   17.27    2.07
   1  -3   9   16.86    2.02
   1  -3   9   17.48    2.13
   1   3  10  213.95   13.31
  -1  -3 -10  209.93   13.43
  -1   3 -10  216.22   13.46
  -1   3 -10  206.65   13.42
  -1   3 -10  202.00   13.40
   1  -3  10  202.46   13.45
   1  -3  10  196.76   13.41
   1  -3  10  222.23   13.45
   1   3  11   47.32    3.63
   1   3  11   46.70    3.42
  -1  -3 -11   47.22    3.47
  -1  -3 -11   48.48    3.49
  -1  -3 -11   41.76    3.62
  -1   3 -11   41.32    3.48
  -1   3 -11   43.31    3.52
   1  -3  11   47.74    3.70
   1   3  12   80.07    5.50
   1   3  12   78.48    5.27
  -1  -3 -12   81.42    5.32
  -1  -3 -12   78.53    5.34
  -1  -3 -12   78.09    5.49
  -1   3 -12   75.67    5.41
  -1   3 -12   74.19    5.35
  -1   3 -12   75.69    5.48
   1  -3  12   70.44    5.39
   1  -3  12   76.48    5.50
   1  -3  12   73.39    5.38
   1   3  13    8.53    2.34
   1   3  13    8.58    1.98
  -1  -3 -13   10.52    2.02
  -1  -3 -13    9.20    1.90
  -1  -3 -13   10.16    2.33
  -1   3 -13   11.70    2.20
  -1   3 -13    8.98    2.04
  -1   3 -13   10.59    2.50
   1  -3  13   10.80    2.35
   1  -3  13   10.31    2.43
   1   3  14  251.34   15.82
  -1  -3 -14  269.26   16.01
  -1  -3 -14  263.94   15.96
  -1  -3 -14  237.18   15.91
  -1   3 -14  243.29   16.02
  -1   3 -14  233.25   15.97
  -1   3 -14  256.47   15.95
   1  -3  14  229.94   15.86
   1   3  15   17.76    2.49
  -1   3 -15   23.87    2.94
   1  -3  15   16.69    2.58
  -1  -3 -16  117.17    8.25
  -1   3 -16  127.41    8.36
   1  -3  16  122.68    8.19
   1   3  17   -2.21    2.20
  -1  -3 -17    1.27    2.42
   1  -3  17   -3.88    2.15
   1   3  18   24.14    2.88
  -1  -3 -18   25.97    3.10
  -1   3 -18   24.27    3.24
   1  -3  18   28.31    2.98
   1   3  19   15.96    2.55
  -1  -3 -19   21.74    3.07
  -1   3 -19   20.29    3.02
   1  -3  19   13.94    2.56
  -1  -3 -20    8.66    2.70
  -1   3 -20   10.16    2.86
   1  -3  21   10.92    2.56
   1   4   0 1285.03   74.02
   1   4   0 1143.92   74.01
  -1  -4   0 1228.83   73.93
  -1  -4   0 1199.08   73.96
  -1  -4   0 1252.03   73.94
  -1   4   0 1109.65   73.83
   1  -4   0 1120.87   73.86
   1  -4   0 1155.51   74.51
   1   4   1  113.83    7.13
  -1  -4  -1  109.58    7.07
  -1  -4  -1  108.73    7.10
  -1  -4  -1  115.37    6.97
  -1   4  -1  100.43    6.96
   1  -4   1  111.94    6.97
   1  -4   1  114.54    7.20
   1   4   2  327.07   18.34
  -1  -4  -2  314.37   18.33
  -1  -4  -2  301.94   18.34
  -1  -4  -2  306.37   18.19
  -1  -4  -2  300.35   18.17
  -1   4  -2  241.41   18.15
   1  -4   2  309.12   18.71
   1  -4   2  301.63   18.67
   1  -4   2  278.31   18.25
   1  -4   2  321.00   18.43
   1   4   3    1.47    1.51
  -1  -4  -3    2.57    1.21
  -1  -4  -3    1.80    1.37
  -1  -4  -3    2.37    0.56
  -1   4  -3    1.36    0.78
  -1   4  -3    1.90    0.60
   1  -4   3    1.72    1.30
   1  -4   3    0.88    1.47
   1  -4   3    1.77    1.41
   1  -4   3    2.06    1.60
   1   4   4    6.60    1.38
  -1  -4  -4    6.86    1.30
  -1  -4  -4    4.97    1.59
  -1  -4  -4    3.57    0.71
  -1   4  -4    6.19    0.99
  -1   4  -4    5.11    0.74
   1  -4   4    5.67    1.45
   1  -4   4    5.57    1.63
   1  -4   4    6.45    1.50
   1  -4   4    4.12    1.67
   1   4   5   67.00    4.42
  -1  -4  -5   75.32    4.38
  -1  -4  -5   61.37    4.39
  -1   4  -5   66.26    4.46
  -1   4  -5   61.77    4.43
  -1   4  -5   61.56    4.18
   1  -4   5   60.78    4.38
   1  -4   5   59.09    4.43
   1   4   6  434.69   25.97
   1   4   6  389.72   25.80
  -1  -4  -6  445.13   26.24
  -1  -4  -6  421.15   25.94
  -1  -4  -6  396.77   25.97
  -1   4  -6  414.26   26.14
  -1   4  -6  418.48   26.18
  -1   4  -6  406.48   25.88
   1  -4   6  419.73   25.98
   1  -4   6  408.44   25.97
   1  -4   6  408.39   25.98
   1   4   7   63.33    4.31
   1   4   7   58.84    4.10
  -1   4  -7   68.43    4.24
   1  -4   7   63.36    4.39
   1  -4   7   58.97    4.36
   1  -4   7   61.46    4.36
   1   4   8   71.48    4.88
   1   4   8   71.62    4.69
  -1  -4  -8   75.47    4.84
  -1  -4  -8   79.88    4.86
  -1  -4  -8   75.24    4.97
  -1   4  -8   70.05    4.88
  -1   4  -8   64.87    4.88
   1  -4   8   64.88    4.87
   1  -4   8   68.99    4.90
   1  -4   8   66.52    4.89
   1   4   9   60.74    4.24
   1   4   9   58.94    4.06
  -1  -4  -9   59.40    4.16
  -1  -4  -9   63.27    4.22
  -1  -4  -9   57.36    4.34
  -1   4  -9   57.67    4.17
   1  -4   9   58.29    4.29
   1  -4   9   57.62    4.35
   1  -4   9   63.59    4.35
   1   4  10   -0.59    1.45
  -1  -4 -10    1.35    1.52
  -1  -4 -10    1.15    1.60
  -1  -4 -10    1.52    2.06
  -1   4 -10    1.52    1.64
  -1   4 -10   -3.66    1.79
  -1   4 -10    1.53    1.81
   1  -4  10    0.31    1.79
   1  -4  10    0.69    2.02
   1  -4  10    1.66    1.99
   1   4  11    0.54    2.01
   1   4  11    2.59    1.60
  -1  -4 -11    1.44    1.99
  -1   4 -11   -3.84    2.14
   1  -4  11    0.38    1.95
   1  -4  11    0.32    1.93
   1  -4  11    0.47    2.11
   1   4  12  167.40   10.44
   1   4  12  156.94   10.24
  -1  -4 -12  163.31   10.35
  -1  -4 -12  172.07   10.37
  -1  -4 -12  155.40   10.37
  -1   4 -12  152.66   10.39
  -1   4 -12  155.57   10.44
  -1   4 -12  158.75   10.38
   1  -4  12  155.01   10.43
   1  -4  12  149.60   10.43
   1  -4  12  157.14   10.38
   1   4  13  112.89    7.54
  -1  -4 -13  122.39    7.68
  -1  -4 -13  122.74    7.68
  -1  -4 -13  109.31    7.68
  -1   4 -13  109.71    7.76
  -1   4 -13  117.73    7.81
  -1   4 -13  119.54    7.76
   1  -4  13  104.04    7.75
   1  -4  13  108.84    7.76
   1  -4  13  110.67    7.66
   1   4  14   18.32    2.35
  -1  -4 -14   22.97    2.60
  -1   4 -14   22.38    2.90
   1  -4  14   17.74    2.40
   1   4  15    2.57    2.00
  -1  -4 -15    0.51    2.28
  -1   4 -15  -10.31    2.67
   1   4  16   27.05    2.90
  -1  -4 -16   30.27    3.15
  -1   4 -16   29.88    3.35
   1  -4  16   29.40    3.01
   1  -4  17    2.96    2.17
  -1  -4 -18    2.87    2.48
  -1   4 -18    5.17    2.69
   1  -4  18    3.87    2.19
  -1  -4 -19    1.25    2.49
   1  -4  19    4.93    2.25
  -1  -4 -20   56.09    4.58
   1  -4  20   51.79    4.23
   1   5   0 1727.87  101.93
  -1  -5   0 1539.08  101.73
  -1  -5   0 1582.10  101.79
  -1  -5   0 1625.70  101.84
  -1   5   0 1750.65  101.93
   1  -5   0 1666.48  101.85
   1  -5   0 1572.19  101.69
   1  -5   0 1613.01  102.24
   1   5   1   16.63    1.84
  -1  -5  -1   13.95    1.63
  -1  -5  -1   13.93    1.70
  -1  -5  -1   16.30    1.31
  -1   5  -1   15.17    1.66
   1  -5   1   16.99    1.71
   1  -5   1   15.26    1.33
   1  -5   1   17.04    1.90
   1   5   2  164.43    9.88
  -1  -5  -2  153.89    9.81
  -1  -5  -2  162.01    9.85
  -1  -5  -2  156.96    9.70
   1  -5   2  141.58    9.70
   1  -5   2  152.58    9.89
   1   5   3  225.43   12.85
  -1  -5  -3  218.75   12.82
  -1  -5  -3  220.78   12.85
  -1  -5  -3  198.80   12.68
  -1  -5  -3  201.22   12.64
  -1   5  -3  167.60   12.63
   1  -5   3  214.30   12.93
   1  -5   3  217.64   12.98
   1  -5   3  218.78   12.87
   1  -5   3  225.67   12.89
  -1  -5  -4  181.79   10.81
  -1  -5  -4  170.73   10.83
  -1  -5  -4  163.56   10.62
  -1   5  -4  165.35   10.75
   1  -5   4  173.44   10.91
   1  -5   4  177.08   10.90
   1   5   5   24.62    2.01
   1   5   5   17.34    1.50
  -1  -5  -5   22.50    1.91
  -1  -5  -5   16.22    2.05
   1  -5   5   19.40    2.06
   1  -5   5   18.62    2.03
   1  -5   5   19.06    2.12
   1  -5   5   21.26    2.14
   1   5   6  112.23    7.06
   1   5   6  102.91    6.87
  -1  -5  -6  115.24    7.07
  -1  -5  -6  103.71    7.07
  -1   5  -6  103.07    6.91
   1  -5   6  104.67    7.12
   1  -5   6  114.20    7.12
   1  -5   6  105.92    7.26
   1  -5   6  114.09    7.09
   1   5   7  140.60    8.76
   1   5   7  122.27    8.56
  -1  -5  -7  143.08    8.81
  -1  -5  -7  145.15    8.76
  -1  -5  -7  137.06    8.80
  -1   5  -7  135.71    8.97
  -1   5  -7  138.01    8.96
  -1   5  -7  131.10    8.62
   1  -5   7  135.34    8.81
   1  -5   7  132.85    8.81
   1   5   8  582.79   35.16
   1   5   8  526.68   34.96
  -1  -5  -8  601.07   35.33
  -1  -5  -8  577.10   35.13
  -1  -5  -8  567.30   35.17
  -1   5  -8  549.78   35.05
   1  -5   8  533.78   35.12
   1   5   9  128.36    8.24
   1   5   9  123.32    7.99
  -1  -5  -9  132.87    8.15
  -1  -5  -9  122.74    8.14
  -1   5  -9  115.42    8.21
  -1   5  -9  125.97    8.27
  -1   5  -9  126.03    8.08
   1  -5   9  119.72    8.21
   1  -5   9  123.88    8.25
   1  -5   9  120.74    8.22
   1   5  10  157.02    9.99
   1   5  10  150.99    9.77
  -1   5 -10  163.02   10.04
  -1   5 -10  155.03   10.02
  -1   5 -10  147.54    9.84
   1  -5  10  143.56    9.96
   1  -5  10  154.83   10.00
   1  -5  10  149.53    9.95
   1   5  11  143.61    9.47
  -1  -5 -11  144.29    9.35
  -1  -5 -11  147.00    9.40
  -1  -5 -11  142.02    9.45
  -1   5 -11  145.87    9.50
  -1   5 -11  146.37    9.51
  -1   5 -11  144.94    9.38
   1  -5  11  137.32    9.45
   1  -5  11  131.56    9.48
   1  -5  11  146.63    9.45
   1   5  12  112.10    7.62
   1   5  12  114.12    7.35
  -1  -5 -12  112.52    7.45
  -1  -5 -12  120.29    7.55
  -1  -5 -12  108.27    7.55
  -1   5 -12  107.31    7.59
  -1   5 -12  124.05    7.66
  -1   5 -12  116.52    7.54
   1  -5  12   96.33    7.57
   1  -5  12   99.96    7.60
   1  -5  12  114.31    7.56
   1   5  13   27.37    2.68
  -1  -5 -13   37.04    3.09
  -1   5 -13   29.58    3.15
  -1   5 -13   27.95    3.11
   1  -5  13   27.23    2.97
   1   5  14   40.39    3.60
  -1  -5 -14   47.57    3.90
  -1   5 -14   48.95    3.97
   1  -5  14   51.05    3.76
   1   5  15    5.16    2.07
  -1  -5 -15    4.24    2.31
  -1   5 -15    6.36    2.56
   1  -5  15    7.02    2.05
  -1  -5 -16  214.70   13.67
  -1   5 -16  205.47   13.65
   1  -5  16  209.67   13.59
  -1  -5 -17   29.49    3.13
  -1  -5 -18   42.35    4.03
   1  -5  18   49.84    3.89
   1  -5  19    0.23    2.15
  -1  -5 -20   39.16    3.67
   1  -5  20   37.36    3.43
   1   6   0   74.52    4.78
  -1  -6   0   60.51    4.60
  -1  -6   0   71.83    4.67
  -1  -6   0   75.15    4.53
  -1   6   0   74.80    4.68
   1  -6   0   70.63    4.67
   1  -6   0   59.85    4.52
   1  -6   0   73.22    4.78
   1   6   1  158.91    9.76
  -1  -6  -1  152.41    9.68
  -1  -6  -1  148.04    9.58
  -1   6  -1  150.09    9.78
   1  -6   1  142.74    9.71
   1  -6   1  158.67    9.78
   1   6   2  728.90   42.09
  -1  -6  -2  676.36   42.00
  -1  -6  -2  667.24   42.01
  -1   6  -2  693.18   43.01
   1  -6   2  672.05   42.03
   1  -6   2  610.38   41.92
   1  -6   2  704.00   42.09
   1   6   3   20.75    2.08
  -1  -6  -3   19.44    2.02
  -1  -6  -3   19.27    1.53
  -1  -6  -3   16.78    1.36
   1  -6   3   20.81    2.04
   1  -6   3   20.00    2.14
   1  -6   3   19.42    2.07
   1  -6   3   19.16    1.53
   1  -6   3   20.26    2.13
   1   6   4  162.31    9.42
  -1  -6  -4  160.55    9.39
  -1  -6  -4  141.54    9.20
  -1  -6  -4  131.79    9.12
   1  -6   4  164.43    9.45
   1  -6   4  153.12    9.48
   1  -6   4  146.17    9.40
   1  -6   4  151.55    9.42
   1   6   5   10.84    1.85
  -1  -6  -5   12.74    1.59
  -1  -6  -5   10.16    1.69
  -1   6  -5    7.46    1.21
   1  -6   5   14.93    1.94
   1  -6   5   12.22    1.96
   1  -6   5    9.97    1.99
   1  -6   5    7.55    1.77
   1   6   6  122.09    7.63
   1   6   6  106.52    7.41
  -1  -6  -6  121.25    7.55
  -1  -6  -6  120.52    7.58
  -1   6  -6  113.45    7.39
   1  -6   6  112.27    7.60
   1  -6   6  116.79    7.63
   1  -6   6  114.58    7.67
   1  -6   6  115.75    7.58
   1   6   7   73.51    4.92
   1   6   7   65.94    4.55
  -1  -6  -7   76.09    4.87
  -1  -6  -7   77.69    4.80
  -1  -6  -7   69.57    4.87
  -1   6  -7   58.17    4.61
   1  -6   7   71.54    4.96
   1  -6   7   68.02    4.93
   1  -6   7   71.09    5.01
   1  -6   7   74.14    4.90
  -1  -6  -8  201.86   13.18
  -1  -6  -8  209.42   13.10
  -1  -6  -8  207.16   13.11
  -1   6  -8  196.94   12.98
   1  -6   8  201.18   13.15
   1  -6   8  202.50   13.19
   1  -6   8  197.30   13.33
   1  -6   8  216.69   13.16
   1   6   9   81.24    5.62
   1   6   9   79.76    5.30
  -1  -6  -9   81.08    5.65
  -1   6  -9   77.38    5.37
   1  -6   9   80.16    5.68
   1  -6   9   82.12    5.69
   1  -6   9   78.77    5.77
   1   6  10   26.50    2.62
   1   6  10   22.21    2.22
  -1  -6 -10   25.22    2.30
  -1  -6 -10   29.39    2.47
  -1  -6 -10   26.85    2.73
  -1   6 -10   23.19    2.46
  -1   6 -10   22.83    2.55
  -1   6 -10   23.39    2.42
   1  -6  10   22.50    2.53
   1  -6  10   21.44    2.82
   1   6  11   55.16    4.33
   1   6  11   53.05    4.00
  -1  -6 -11   63.13    4.18
  -1  -6 -11   63.73    4.25
  -1  -6 -11   54.69    4.36
  -1   6 -11   59.32    4.40
  -1   6 -11   61.11    4.38
   1  -6  11   48.07    4.30
   1  -6  11   49.40    4.42
   1  -6  11   53.23    4.27
   1   6  12  244.61   16.18
  -1  -6 -12  273.67   16.37
  -1  -6 -12  259.96   16.39
  -1   6 -12  255.99   16.61
  -1   6 -12  254.02   16.62
  -1   6 -12  246.66   16.29
   1   6  13   39.76    3.15
  -1  -6 -13   40.32    3.55
  -1   6 -13   33.57    3.41
   1  -6  13   40.17    3.41
  -1  -6 -14    9.42    2.49
  -1   6 -14   10.30    2.48
   1  -6  14   13.43    2.23
  -1  -6 -15    3.31    2.46
  -1   6 -15    1.59    2.42
   1  -6  15    4.83    2.08
  -1  -6 -16    3.56    2.38
   1  -6  16    2.32    2.15
  -1  -6 -17    0.73    2.38
   1  -6  17    0.37    2.18
  -1  -6 -18   -8.56    2.62
   1  -6  18    0.81    2.20
  -1  -6 -19   14.60    2.78
   1   7   0 1515.89   91.86
  -1  -7   0 1369.58   91.71
  -1  -7   0 1451.04   91.74
  -1   7   0 1572.84   91.97
   1  -7   0 1415.55   91.69
   1  -7   0 1509.13   91.78
   1  -7   0 1454.10   91.93
   1   7   1   12.42    1.96
  -1  -7  -1   12.66    1.54
  -1  -7  -1   10.63    1.70
  -1  -7  -1   12.34    1.26
  -1   7  -1    8.62    1.82
   1  -7   1    9.47    1.81
   1  -7   1    8.57    1.32
   1   7   2   79.93    5.13
  -1  -7  -2   73.80    4.98
  -1  -7  -2   79.02    5.00
  -1  -7  -2   72.59    4.79
  -1   7  -2   76.89    5.18
   1  -7   2   70.91    5.06
   1  -7   2   69.01    4.82
   1  -7   2   75.04    5.12
   1   7   3  126.56    7.46
  -1  -7  -3  114.38    7.31
  -1  -7  -3  108.26    7.14
   1  -7   3  119.61    7.50
   1  -7   3  117.36    7.51
   1  -7   3  110.43    7.40
   1  -7   3  103.78    7.19
   1  -7   3  111.96    7.42
   1   7   4  182.89   11.14
  -1  -7  -4  184.60   11.07
  -1  -7  -4  175.49   11.07
  -1  -7  -4  158.94   10.89
   1  -7   4  171.83   11.16
   1  -7   4  184.12   11.23
   1  -7   4  165.35   11.11
   1  -7   4  172.29   11.12
   1   7   5  224.79   12.85
  -1  -7  -5  208.88   12.79
  -1  -7  -5  208.38   12.79
  -1  -7  -5  176.55   12.60
  -1   7  -5  188.39   12.70
   1  -7   5  214.72   12.92
   1  -7   5  212.24   12.90
   1  -7   5  197.03   12.83
   1  -7   5  210.65   12.82
  -1  -7  -6  516.58   29.68
  -1  -7  -6  422.19   30.11
  -1   7  -6  437.82   29.51
   1  -7   6  480.22   29.70
   1  -7   6  496.55   29.72
   1  -7   6  478.52   29.67
   1   7   7  125.14    8.35
  -1  -7  -7  130.27    8.25
  -1  -7  -7  129.73    8.30
   1  -7   7  119.52    8.39
   1  -7   7  121.76    8.31
   1   7   8  583.70   35.32
  -1  -7  -8  561.30   35.22
   1  -7   8  536.16   35.26
   1  -7   8  551.44   35.28
   1  -7   8  544.28   35.42
   1  -7   8  570.62   35.28
   1   7   9    2.52    2.10
   1   7   9    0.00    1.29
  -1  -7  -9   -2.32    1.48
  -1  -7  -9    0.80    1.52
  -1  -7  -9    0.58    2.09
  -1   7  -9    1.09    1.48
   1  -7   9    2.21    2.13
   1  -7   9    0.61    2.26
   1  -7   9   -5.65    2.32
   1  -7   9   -1.91    2.11
   1   7  10  229.30   13.74
   1   7  10  199.76   13.45
  -1  -7 -10  233.87   13.73
  -1  -7 -10  235.13   13.68
  -1  -7 -10  215.44   13.65
  -1   7 -10  206.37   13.52
   1  -7  10  194.81   13.69
   1  -7  10  194.94   13.73
   1  -7  10  209.90   13.84
   1  -7  10  207.22   13.66
   1   7  11   67.75    5.05
  -1  -7 -11   82.61    5.32
  -1  -7 -11   77.51    5.32
  -1   7 -11   74.60    5.18
   1  -7  11   72.54    5.49
  -1  -7 -12   49.56    3.77
  -1   7 -12   39.83    3.49
   1  -7  12   41.62    3.86
  -1  -7 -13  106.61    7.02
  -1   7 -13   95.39    6.90
   1  -7  13  103.02    6.98
   1  -7  14   73.66    5.36
  -1  -7 -15    3.47    2.47
   1  -7  15    0.90    2.07
  -1  -7 -16   82.48    5.93
   1  -7  16   81.26    5.84
  -1  -7 -17    5.42    2.45
   1  -7  17    2.37    2.28
  -1  -7 -18   35.81    3.52
   1  -7  18   36.71    3.37
  -1  -7 -19    1.39    2.46
   1  -7  19    1.91    2.31
   1   8   0   10.08    2.14
  -1  -8   0    7.13    1.50
  -1  -8   0    9.55    1.68
  -1  -8   0    9.51    1.42
  -1   8   0    9.05    1.93
   1  -8   0   10.15    1.77
   1  -8   0    9.61    1.55
   1  -8   0    7.94    2.08
   1   8   1  109.31    6.75
  -1  -8  -1   99.60    6.55
  -1  -8  -1   96.23    6.57
  -1  -8  -1   95.31    6.38
  -1   8  -1  103.56    6.70
   1  -8   1   95.51    6.59
   1  -8   1   98.81    6.42
   1  -8   1   98.80    6.69
   1   8   2  381.67   21.61
  -1  -8  -2  357.78   21.50
  -1  -8  -2  349.19   21.52
  -1  -8  -2  325.29   21.34
  -1   8  -2  347.67   21.99
   1  -8   2  341.68   21.52
   1  -8   2  311.73   21.36
   1  -8   2  342.43   21.54
   1   8   3  283.75   16.59
  -1  -8  -3  275.97   16.50
  -1  -8  -3  255.37   16.49
  -1  -8  -3  238.14   16.31
   1  -8   3  259.78   16.74
   1  -8   3  260.41   16.75
   1  -8   3  265.75   16.56
  -1  -8  -4  681.43   39.72
  -1  -8  -4  592.22   39.52
   1  -8   4  634.19   39.93
   1  -8   4  665.31   40.01
   1  -8   4  633.21   39.73
   1   8   5    5.54    1.93
  -1  -8  -5    4.69    1.59
  -1  -8  -5    4.42    1.08
   1  -8   5    5.47    2.10
   1  -8   5    3.72    1.92
   1   8   6  393.02   21.65
  -1  -8  -6  288.09   21.34
   1  -8   6  361.14   21.69
   1  -8   6  359.59   21.67
   1  -8   6  347.37   21.61
   1  -8   6  383.80   21.65
   1   8   7   67.70    4.52
  -1  -8  -7   62.91    4.21
  -1  -8  -7   60.00    4.26
  -1  -8  -7   49.21    3.83
  -1   8  -7   54.54    3.96
   1  -8   7   68.52    4.53
   1  -8   7   71.37    4.52
   1  -8   7   56.84    4.42
   1  -8   7   57.51    4.29
   1   8   8   10.19    2.47
  -1  -8  -8    9.79    1.84
  -1  -8  -8    7.90    2.02
  -1   8  -8    8.31    1.56
   1  -8   8   11.11    2.40
   1  -8   8    7.91    2.40
   1  -8   8    9.09    2.30
   1  -8   8   11.80    2.26
   1   8   9   57.95    4.80
  -1  -8  -9   67.73    4.56
  -1  -8  -9   71.71    4.59
  -1  -8  -9   58.40    4.59
  -1   8  -9   52.94    4.30
   1  -8   9   64.56    4.81
   1  -8   9   72.60    4.90
   1  -8   9   66.92    4.78
   1  -8   9   60.87    4.68
  -1  -8 -10  152.84    8.98
  -1   8 -10  124.16    8.73
   1  -8  10  134.62    9.09
  -1  -8 -11    1.22    2.17
   1  -8  11    2.54    2.32
   1  -8  11    0.39    2.11
  -1  -8 -12  231.68   15.06
   1  -8  12  235.67   15.08
  -1  -8 -13    1.06    2.19
   1  -8  13    1.67    2.20
  -1  -8 -14   58.65    4.66
   1  -8  14   63.91    4.70
  -1  -8 -15    2.28    2.36
   1  -8  16    1.03    2.12
  -1  -8 -17   69.21    5.09
   1  -8  17   65.62    5.00
  -1  -8 -18   20.04    2.91
   1  -8  18   24.65    2.84
   1   9   0  971.63   58.95
  -1  -9   0  923.06   58.78
  -1  -9   0  943.05   58.77
  -1  -9   0  867.90   58.64
  -1   9   0 1016.11   59.07
   1  -9   0  876.86   58.69
   1  -9   0  961.55   58.67
   1  -9   0  986.57   58.84
   1   9   1  355.88   21.68
  -1  -9  -1  346.18   21.60
  -1  -9  -1  348.63   21.58
  -1  -9  -1  318.33   21.44
  -1   9  -1  357.34   21.81
   1  -9   1  338.58   21.57
   1  -9   1  328.21   21.47
   1  -9   1  354.82   21.63
   1   9   2  462.81   26.78
  -1  -9  -2  430.24   26.63
  -1  -9  -2  395.17   26.44
  -1   9  -2  430.55   27.33
   1  -9   2  410.85   26.62
   1  -9   2  431.11   26.67
   1   9   3    3.60    2.41
  -1  -9  -3    5.75    1.88
   1  -9   3    6.76    2.28
   1  -9   3    3.56    2.19
   1  -9   3    3.26    2.04
   1  -9   3    5.53    1.43
   1  -9   3    6.74    2.14
   1   9   4  240.88   13.86
  -1  -9  -4  225.14   13.72
  -1  -9  -4  219.52   13.71
  -1  -9  -4  200.88   13.50
   1  -9   4  210.33   13.89
   1  -9   4  212.34   13.90
   1  -9   4  217.60   13.77
   1  -9   4  201.00   13.92
   1  -9   4  212.13   13.76
   1   9   5   11.51    2.46
  -1  -9  -5   14.07    1.88
  -1  -9  -5   15.09    2.26
  -1  -9  -5   10.06    1.36
   1  -9   5   11.78    2.50
   1  -9   5   13.85    2.57
   1  -9   5   10.30    2.23
   1  -9   5   12.58    2.26
   1   9   6  131.24    7.79
  -1  -9  -6  122.13    7.62
  -1  -9  -6  126.19    7.71
  -1  -9  -6   99.23    7.32
  -1   9  -6  108.11    7.41
   1  -9   6  121.95    7.82
   1  -9   6  126.77    7.87
   1  -9   6  123.14    7.76
   1   9   7   18.72    2.47
  -1  -9  -7   16.22    2.09
  -1  -9  -7   19.86    2.29
  -1   9  -7   13.83    1.70
   1  -9   7   12.08    2.49
   1  -9   7   16.98    2.74
   1  -9   7   15.16    2.56
   1  -9   7   14.37    2.36
  -1  -9  -8  242.96   14.57
   1  -9   8  214.86   14.58
   1  -9   8  218.75   14.55
  -1  -9  -9   52.50    3.91
   1  -9   9   47.59    4.05
   1  -9   9   45.59    3.97
  -1  -9 -10  507.96   29.62
   1  -9  10  434.88   29.60
   1  -9  10  458.14   29.56
  -1  -9 -11    1.33    2.11
   1  -9  11   -1.28    2.11
  -1  -9 -12    1.05    2.14
   1  -9  12    2.76    2.17
  -1  -9 -13   21.68    2.79
   1  -9  13   25.02    2.84
  -1  -9 -14   89.39    6.17
   1  -9  14   85.85    6.20
  -1  -9 -15    4.06    2.23
   1  -9  15    1.90    2.18
  -1  -9 -16   16.16    2.63
   1  -9  16   16.49    2.52
  -1  -9 -17    3.71    2.34
   1  10   0    2.28    2.39
  -1 -10   0    5.80    1.72
  -1 -10   0    4.25    1.65
  -1  10   0    4.59    2.30
   1 -10   0    5.86    1.98
   1 -10   0    4.58    2.32
   1  10   1   22.87    2.61
  -1 -10  -1   18.20    2.10
  -1 -10  -1   17.09    2.20
  -1 -10  -1   16.25    1.77
  -1  10  -1   20.21    2.64
   1 -10   1   13.19    2.21
   1 -10   1   14.94    2.00
   1 -10   1   13.42    2.49
   1  10   2   10.33    2.29
  -1 -10  -2    4.76    1.68
  -1 -10  -2    7.14    2.08
  -1 -10  -2    7.78    1.36
   1 -10   2    5.77    2.01
   1 -10   2    5.24    1.51
   1 -10   2    7.31    2.31
   1  10   3  195.42   11.73
  -1 -10  -3  196.36   11.56
  -1 -10  -3  183.32   11.54
  -1 -10  -3  169.47   11.28
   1 -10   3  179.93   11.76
   1 -10   3  185.27   11.81
   1 -10   3  167.05   11.55
   1 -10   3  168.20   11.39
   1 -10   3  176.67   11.58
   1  10   4   -0.38    2.54
  -1 -10  -4   -1.26    1.67
  -1 -10  -4   -1.62    2.05
   1 -10   4    1.24    2.27
   1 -10   4   -5.09    2.53
   1 -10   4    0.31    2.09
   1 -10   4    2.35    1.47
   1 -10   4    1.35    2.10
  -1 -10  -5    8.08    1.78
  -1 -10  -5    6.59    2.17
   1 -10   5    6.20    2.51
   1 -10   5    5.50    2.50
   1 -10   5    9.44    2.20
  -1 -10  -6    5.07    2.13
   1 -10   6    4.74    2.19
   1 -10   6    7.23    2.24
   1 -10   7   60.64    4.65
  -1 -10  -8   49.16    3.77
   1 -10   8   37.71    3.74
   1 -10   8   40.48    3.66
  -1 -10  -9   36.90    3.36
  -1 -10 -10   15.61    2.54
   1 -10  10   12.97    2.46
   1 -10  11    7.93    2.26
  -1 -10 -12    1.40    2.17
   1 -10  12    3.63    2.16
  -1 -10 -13    0.64    2.21
   1 -10  13    1.22    2.36
  -1 -10 -14    7.59    2.33
   1 -10  14    8.23    2.34
  -1 -10 -15   28.61    3.20
   1 -10  15   34.05    3.22
  -1 -10 -16   20.23    2.80
   1 -10  16   20.91    2.61
  -1 -11   0   44.58    3.56
  -1 -11   0   41.91    3.40
  -1  11   0   47.71    3.85
   1 -11   0   42.98    3.63
   1 -11   0   45.76    3.42
   1 -11   0   47.64    3.84
  -1 -11  -1  207.51   13.70
  -1 -11  -1  209.86   13.57
  -1  11  -1  215.30   14.01
   1 -11   1  206.76   13.71
   1 -11   1  213.51   13.61
   1 -11   1  228.73   13.81
  -1 -11  -2   55.14    3.97
  -1 -11  -2   52.11    3.60
   1 -11   2   50.96    4.00
   1 -11   2   48.60    3.71
   1 -11   3   88.96    6.32
   1 -11   3   92.83    6.33
  -1 -11  -4    1.38    2.13
   1 -11   4    0.35    2.13
   1 -11   4    5.13    2.23
   1 -11   5   32.83    3.35
   1 -11   5   40.39    3.42
  -1 -11  -6    1.83    2.13
   1 -11   6    1.66    2.34
  -1 -11  -7   24.25    2.82
   1 -11   7   23.88    2.90
  -1 -11  -8    3.40    2.43
   1 -11   8    4.44    2.35
  -1 -11  -9   16.44    2.64
   1 -11   9   19.46    2.74
  -1 -11 -10   96.69    6.78
   1 -11  10   98.24    6.80
  -1 -11 -11   34.16    3.24
   1 -11  11   27.50    3.14
  -1 -11 -12    3.59    2.26
  -1 -11 -13   32.52    3.30
   1 -11  14   42.54    3.74
  -1 -11 -15   24.03    2.88
   1 -11  15   22.25    2.82
  -1 -12   0   75.82    5.27
  -1 -12   0   70.38    5.06
   1 -12   0   68.51    5.11
   1 -12   0   80.37    5.42
  -1 -12  -1   98.68    6.47
   1 -12   1   88.53    6.60
  -1 -12  -2   58.01    4.39
   1 -12   2   58.36    4.59
   1 -12   3   61.33    4.71
  -1 -12  -4   11.48    2.34
   1 -12   4    8.56    2.50
  -1 -12  -5   10.11    2.45
   1 -12   6    3.83    2.42
  -1 -12  -7   62.90    4.59
   1 -12   7   55.96    4.64
  -1 -12  -8    5.91    2.34
   1 -12   8   10.60    2.49
  -1 -12  -9   26.82    2.93
   1 -12   9   25.70    3.01
  -1 -12 -10    1.87    2.39
   1 -12  10   -4.64    2.35
  -1 -12 -11    2.81    2.37
   1 -12  11    1.29    2.29
  -1 -12 -12    8.33    2.45
   1 -12  12    5.66    2.35
  -1 -12 -13   -5.16    2.42
   1 -12  13    2.95    2.43
  -1 -12 -14    3.08    2.43
   1 -12  14    1.58    2.23
  -1 -13  -1    1.15    2.16
  -1 -13  -2    1.55    2.24
   1 -13   2    1.81    2.55
  -1 -13  -3   29.56    2.90
   1 -13   3   19.96    2.99
  -1 -13  -4    4.01    2.39
   1 -13   4    4.80    2.47
  -1 -13  -5  131.50    8.44
   1 -13   5  118.32    8.47
  -1 -13  -6   22.66    2.82
   1 -13   6   18.43    2.85
  -1 -13  -7   24.80    2.73
   1 -13   7   15.78    2.81
  -1 -13  -8   20.46    2.95
   1 -13   8   28.08    2.99
   1 -13  10   19.53    2.77
  -1 -13 -11   33.21    3.24
   1 -13  11   31.42    3.25
  -1 -13 -12    6.51    2.33
   1 -13  12    7.74    2.41
   1 -13  13   18.99    2.66
  -1 -14   0   17.04    2.58
   1 -14   0   17.11    2.94
  -1 -14  -1   72.68    5.31
  -1 -14  -2   42.24    3.75
   1 -14   2   46.02    3.93
  -1 -14  -3    5.35    2.43
   1 -14   4  149.33    9.97
  -1 -14  -5    2.72    2.26
   1 -14   5    3.07    2.53
  -1 -14  -6   63.65    5.10
   1 -14   6   71.17    5.13
  -1 -14  -7   11.45    2.51
   1 -14   7   14.60    2.64
  -1 -14  -8    0.94    2.29
   1 -14   8   -4.25    2.45
  -1 -14  -9    8.74    2.45
   1 -14   9    4.85    2.42
  -1 -14 -10   23.58    2.97
   1 -14  10   24.49    3.01
  -1 -14 -11    3.33    2.28
   1 -14  11    4.31    2.37
  -1 -15  -2    7.03    2.37
   1 -15   2    8.77    2.65
  -1 -15  -3   34.39    3.39
   1 -15   3   37.11    3.58
  -1 -15  -4   51.39    4.16
   1 -15   4   46.03    4.16
  -1 -15  -5   24.09    2.95
   1 -15   5   31.00    3.19
  -1 -15  -6   20.85    2.78
   1 -15   6   20.34    2.92
  -1 -15  -7    0.73    2.36
   1 -15   7    2.84    2.47
  -1 -15  -9    0.59    2.31
   1 -15   9    0.00    2.42
  -1 -16  -6   24.88    3.01
   1 -16   7   13.42    2.64
   2   0   0  608.41   40.47
  -2   0   0  753.77   40.72
  -2   0   0  673.61   40.96
  -2   0  -1    1.27    0.63
  -2   0  -1    0.11    0.66
  -2   0  -1    0.45    0.99
   2   0   2  363.48   22.25
   2   0   2  339.95   22.23
  -2   0  -2  362.48   22.30
   2   0   3    0.35    0.98
   2   0   3   -1.73    1.11
   2   0   3   -0.33    1.28
  -2   0  -3    0.24    0.74
  -2   0  -3    1.06    0.87
  -2   0  -3   -0.02    1.07
   2   0   4  717.46   46.58
   2   0   4  719.86   46.57
   2   0   4  744.82   46.64
  -2   0  -4  773.21   46.59
  -2   0  -4  760.42   46.57
   2   0   5    0.65    1.21
   2   0   5    0.56    1.33
   2   0   5    0.77    1.26
  -2   0  -5    0.28    1.08
  -2   0  -5    0.28    1.08
  -2   0  -5    0.91    1.23
   2   0   6  807.44   48.32
  -2   0  -6  788.17   48.24
  -2   0  -6  779.32   48.23
  -2   0  -6  709.20   48.24
   2   0   7    0.97    1.34
   2   0   7   -0.20    1.54
   2   0   7   -4.14    1.43
  -2   0  -7    0.69    1.42
   2   0   8  420.67   26.80
   2   0   8  431.53   26.78
   2   0   8  423.04   26.77
  -2   0  -8  440.04   26.79
  -2   0  -8  437.78   26.79
  -2   0  -8  396.30   26.74
   2   0   9   -2.66    1.64
   2   0   9   -0.55    1.86
   2   0   9    2.58    1.67
  -2   0  -9    0.11    1.39
  -2   0  -9   -2.53    1.51
  -2   0  -9   -3.59    1.66
   2   0  10  796.24   50.29
   2   0  10  806.86   50.19
   2   0  10  812.94   50.15
  -2   0 -10  793.51   50.20
  -2   0 -10  804.62   50.21
  -2   0 -10  773.38   50.12
   2   0  11   -6.80    1.96
   2   0  11    0.68    2.20
   2   0  11    0.50    1.91
  -2   0 -11   -1.43    1.58
  -2   0 -11    0.02    1.60
  -2   0 -11   -0.17    1.92
   2   0  12  126.87    8.61
   2   0  12  115.23    8.63
  -2   0 -12  136.90    8.54
  -2   0 -12  133.03    8.52
  -2   0 -12  127.60    8.52
   2   0  13    0.96    2.07
  -2   0 -13    1.17    2.11
   2   0  14  623.20   39.32
   2   0  15    0.07    2.10
  -2   0 -15    3.43    2.37
   2   0  16  238.28   15.28
  -2   0 -16  236.80   15.38
   2   0  17    0.67    2.27
  -2   0 -17   -5.38    2.69
  -2   0 -18  114.18    7.91
   2   0  19   -9.62    2.42
   2   0  20  143.62   10.06
  -2   0 -20  162.68   10.21
   2   0  21    0.52    2.36
  -2   0 -21   -5.15    2.77
  -2  -1   0    2.57    0.61
  -2  -1   0    3.34    1.26
  -2  -1   0    2.40    0.95
  -2   1   0    2.02    0.92
   2  -1   0    3.21    0.71
   2   1   1  188.91   12.79
  -2  -1  -1  199.45   12.82
  -2  -1  -1  204.40   12.80
  -2  -1  -1  214.42   12.90
  -2   1  -1  228.43   13.16
  -2   1  -1  221.52   13.14
   2  -1   1  208.97   12.83
   2  -1   1  212.93   12.83
   2  -1   1  188.89   12.81
   2  -1   1  201.04   13.33
   2   1   2 2688.69  168.22
   2   1   2 2701.64  168.61
  -2  -1  -2 2670.10  168.32
   2  -1   2 2839.09  168.14
   2  -1   2 2949.95  168.18
   2  -1   2 2352.11  167.97
   2  -1   2 2805.89  168.94
   2   1   3    8.08    1.23
  -2  -1  -3    9.69    1.14
  -2  -1  -3    9.46    1.15
  -2   1  -3    9.97    1.19
  -2   1  -3    9.88    1.23
  -2   1  -3   10.07    1.16
   2  -1   3   11.13    1.20
   2  -1   3   12.38    1.22
   2   1   4 1997.81  125.68
   2   1   4 1995.80  123.98
   2   1   4 2000.58  123.97
  -2  -1  -4 1899.26  123.86
  -2  -1  -4 2034.36  123.90
  -2  -1  -4 1877.66  123.99
  -2   1  -4 2061.47  124.02
  -2   1  -4 2063.73  124.02
  -2   1  -4 1844.54  123.91
   2  -1   4 1988.16  123.97
   2  -1   4 2034.18  123.98
   2  -1   4 2039.17  124.10
   2   1   5   43.49    3.22
   2   1   5   41.62    3.21
   2   1   5   48.58    3.16
  -2  -1  -5   44.87    3.17
  -2  -1  -5   43.51    3.15
  -2  -1  -5   41.44    3.24
  -2   1  -5   51.09    3.16
  -2   1  -5   53.83    3.19
  -2   1  -5   42.89    3.14
   2  -1   5   44.15    3.24
   2  -1   5   45.06    3.24
   2   1   6   18.51    1.74
   2   1   6   17.83    1.82
   2   1   6   17.24    1.75
  -2  -1  -6   20.09    1.60
  -2  -1  -6   22.64    1.63
  -2  -1  -6   15.58    1.91
  -2   1  -6   14.98    1.64
  -2   1  -6   17.95    1.72
   2  -1   6   19.30    1.80
   2  -1   6   16.19    1.94
   2  -1   6   16.77    1.83
   2   1   7   32.16    2.55
   2   1   7   35.52    2.62
   2   1   7   31.06    2.51
  -2  -1  -7   33.03    2.44
  -2  -1  -7   34.54    2.52
  -2   1  -7   30.82    2.45
  -2   1  -7   33.53    2.49
  -2   1  -7   32.27    2.55
   2  -1   7   28.69    2.55
   2  -1   7   32.62    2.61
   2  -1   7   28.35    2.60
   2   1   8   23.05    2.21
   2   1   8   25.65    2.32
   2   1   8   23.93    2.17
  -2  -1  -8   22.93    2.07
  -2  -1  -8   24.63    2.15
  -2  -1  -8   22.51    2.31
  -2   1  -8   25.43    2.13
  -2   1  -8   22.08    2.16
  -2   1  -8   23.29    2.16
   2  -1   8   21.21    2.21
   2  -1   8   25.32    2.38
   2  -1   8   22.86    2.32
   2   1   9   54.22    4.11
   2   1   9   59.51    4.17
   2   1   9   59.25    4.05
  -2  -1  -9   60.31    4.03
  -2  -1  -9   60.92    4.01
  -2  -1  -9   52.23    4.11
  -2   1  -9   56.65    4.05
  -2   1  -9   62.15    4.06
  -2   1  -9   55.99    4.05
   2  -1   9   52.50    4.09
   2  -1   9   51.86    4.19
   2  -1   9   55.74    4.10
   2   1  10  429.07   27.37
   2   1  10  424.50   27.18
  -2  -1 -10  463.23   27.18
  -2  -1 -10  454.93   27.17
  -2  -1 -10  417.18   27.16
  -2   1 -10  438.92   27.18
  -2   1 -10  426.04   27.18
  -2   1 -10  409.67   27.10
   2  -1  10  407.78   27.15
   2  -1  10  407.18   27.18
   2  -1  10  451.17   27.20
   2   1  11   73.74    5.53
   2   1  11   74.49    5.55
   2   1  11   76.37    5.38
  -2  -1 -11   82.29    5.42
  -2  -1 -11   73.99    5.39
  -2  -1 -11   80.74    5.55
  -2   1 -11   74.32    5.39
  -2   1 -11   83.34    5.46
  -2   1 -11   77.70    5.42
   2  -1  11   75.97    5.52
   2  -1  11   73.94    5.60
   2  -1  11   90.80    5.48
   2   1  12  405.76   26.68
   2   1  12  415.96   26.45
   2   1  12  418.31   26.35
  -2  -1 -12  428.89   26.43
  -2  -1 -12  419.14   26.41
  -2  -1 -12  419.65   26.42
  -2   1 -12  430.89   26.44
  -2   1 -12  416.28   26.44
   2  -1  12  384.91   26.42
   2  -1  12  409.11   26.45
   2  -1  12  427.90   26.39
   2   1  13   21.21    2.48
  -2  -1 -13   25.95    2.76
  -2   1 -13   19.28    2.27
  -2   1 -13   21.54    2.27
  -2   1 -13   19.92    2.65
   2  -1  13   17.85    2.55
   2   1  14   46.18    3.69
  -2  -1 -14   42.65    3.86
  -2   1 -14   46.29    3.79
   2   1  15    0.00    2.12
  -2   1 -15    1.37    2.38
   2  -1  16   -3.68    2.27
   2   1  17    0.25    2.22
  -2  -1 -17    1.51    2.53
  -2   1 -17    3.40    2.60
   2  -1  17    2.27    2.23
   2   1  18   85.47    6.73
  -2  -1 -18  102.33    6.94
  -2   1 -18  103.38    7.01
   2  -1  18  102.35    6.77
   2   1  19   12.58    2.52
  -2  -1 -19   12.27    2.81
  -2   1 -19   12.52    2.80
   2  -1  19   11.40    2.50
  -2  -1 -20    9.47    2.74
  -2   1 -20    8.30    2.77
   2  -1  20    9.91    2.45
  -2  -1 -21    1.76    2.59
   2  -1  21    2.67    2.37
   2   2   0 1807.06  110.99
   2   2   0 1719.75  110.99
  -2  -2   0 1836.99  111.26
  -2  -2   0 1686.72  111.16
   2  -2   0 1892.21  112.17
   2  -2   0 1799.81  111.23
   2   2   1 1137.30   73.73
   2   2   1 1182.39   73.70
  -2  -2  -1 1095.69   73.68
  -2  -2  -1 1252.76   73.82
   2  -2   1 1290.98   73.91
   2  -2   1 1271.10   73.91
   2  -2   1 1275.88   73.90
   2  -2   1 1079.63   73.70
   2  -2   1 1119.80   74.78
   2   2   2   23.56    1.99
   2   2   2   32.55    1.92
   2   2   2   22.65    1.85
  -2  -2  -2   23.97    1.95
  -2  -2  -2   25.85    1.97
  -2  -2  -2   24.73    2.17
  -2   2  -2   33.47    1.82
   2  -2   2   27.29    2.05
   2  -2   2   28.97    2.08
   2  -2   2   22.26    1.83
   2  -2   2   29.92    2.39
   2   2   3    3.36    1.03
   2   2   3    3.73    0.82
  -2  -2  -3    3.00    0.97
  -2  -2  -3    4.42    0.99
  -2  -2  -3    2.45    1.34
  -2   2  -3    3.41    1.12
  -2   2  -3    3.26    1.14
  -2   2  -3    3.57    0.69
   2  -2   3    5.02    1.16
   2  -2   3    2.72    1.18
   2  -2   3    3.16    0.78
   2  -2   3    2.98    1.60
   2   2   4  567.31   35.35
   2   2   4  591.05   35.32
  -2  -2  -4  539.15   35.35
  -2  -2  -4  564.25   35.33
  -2  -2  -4  559.34   35.39
  -2   2  -4  598.09   35.43
  -2   2  -4  578.57   35.42
  -2   2  -4  529.84   35.27
   2  -2   4  552.21   35.37
   2  -2   4  565.48   35.37
   2  -2   4  571.85   35.42
   2   2   5  298.91   17.70
  -2  -2  -5  278.04   17.70
  -2  -2  -5  270.36   17.71
  -2  -2  -5  277.32   17.75
  -2   2  -5  269.16   17.65
   2  -2   5  295.40   17.82
   2   2   6  193.08   11.57
   2   2   6  175.08   11.47
  -2  -2  -6  184.07   11.51
  -2  -2  -6  191.11   11.55
  -2  -2  -6  169.47   11.53
  -2   2  -6  181.13   11.57
  -2   2  -6  181.37   11.56
  -2   2  -6  178.06   11.47
   2  -2   6  171.84   11.55
   2  -2   6  179.39   11.54
   2  -2   6  189.17   11.58
   2   2   7   44.69    3.45
  -2  -2  -7   47.86    3.34
  -2  -2  -7   51.99    3.35
  -2  -2  -7   43.36    3.46
  -2   2  -7   46.21    3.42
  -2   2  -7   47.95    3.43
  -2   2  -7   48.49    3.31
   2  -2   7   46.19    3.42
   2  -2   7   46.72    3.45
   2   2   8  211.02   13.08
   2   2   8  203.35   12.97
  -2  -2  -8  218.28   13.04
  -2  -2  -8  204.39   13.01
  -2  -2  -8  192.96   13.04
  -2   2  -8  200.54   13.06
  -2   2  -8  195.47   13.05
  -2   2  -8  196.37   12.97
   2  -2   8  205.16   13.06
   2  -2   8  218.71   13.10
   2  -2   8  202.38   13.09
   2   2   9   28.87    2.71
   2   2   9   29.72    2.46
  -2  -2  -9   29.73    2.47
  -2  -2  -9   30.01    2.47
  -2   2  -9   30.32    2.51
  -2   2  -9   27.58    2.55
   2  -2   9   26.16    2.67
   2  -2   9   29.51    2.72
   2  -2   9   27.81    2.69
   2   2  10  114.91    7.83
   2   2  10  123.97    7.67
  -2  -2 -10  113.94    7.73
  -2  -2 -10  120.69    7.77
  -2   2 -10  117.35    7.77
  -2   2 -10  123.13    7.78
  -2   2 -10  118.66    7.73
   2  -2  10  109.35    7.76
   2  -2  10  116.76    7.84
   2  -2  10  111.76    7.78
   2   2  11    6.14    2.31
   2   2  11    6.98    1.80
  -2  -2 -11    4.84    1.54
  -2  -2 -11    4.66    1.76
  -2  -2 -11    5.85    2.21
  -2   2 -11    5.24    1.71
  -2   2 -11    5.96    1.78
  -2   2 -11    7.89    2.07
   2  -2  11    7.15    2.09
   2  -2  11    6.95    2.29
   2  -2  11    4.46    2.07
   2   2  12    7.16    2.42
   2   2  12    5.16    1.97
  -2  -2 -12    3.48    1.71
  -2  -2 -12    5.63    1.61
  -2  -2 -12    3.80    2.20
  -2   2 -12    3.81    1.69
  -2   2 -12    4.95    1.75
  -2   2 -12    5.70    2.17
   2  -2  12    8.35    2.22
   2  -2  12    5.79    2.37
   2  -2  12    5.87    2.19
   2   2  13    6.02    2.03
  -2  -2 -13    5.91    2.34
  -2   2 -13    5.81    2.31
   2  -2  13    5.47    2.22
   2   2  14  265.83   16.33
  -2  -2 -14  250.79   16.40
  -2   2 -14  257.52   16.36
   2  -2  14  244.83   16.33
  -2  -2 -15    0.35    2.47
  -2   2 -15    0.89    2.27
   2  -2  15   -3.83    2.21
   2   2  16   82.19    6.20
  -2  -2 -16   99.41    6.46
   2   2  17    0.61    2.20
  -2   2 -17    0.72    2.44
   2  -2  17   -3.52    2.29
   2   2  18   16.62    2.57
  -2  -2 -18   16.75    2.88
   2  -2  18   20.39    2.68
  -2  -2 -19    7.71    2.83
  -2   2 -19    8.65    2.78
   2  -2  19   10.57    2.46
  -2  -2 -20   25.38    3.15
   2  -2  20   23.87    2.96
  -2  -2 -21   13.45    2.79
   2   3   0  827.13   49.59
   2   3   0  783.39   49.50
  -2  -3   0  746.98   49.55
  -2  -3   0  816.51   49.69
  -2  -3   0  775.50   49.54
  -2   3   0  816.26   49.84
   2  -3   0  805.33   49.57
   2  -3   0  783.44   50.11
   2   3   1  237.65   13.54
   2   3   1  215.37   13.40
  -2  -3  -1  226.17   13.50
   2  -3   1  231.80   13.69
   2  -3   1  230.46   13.70
   2  -3   1  245.12   13.56
   2  -3   1  188.30   13.38
   2  -3   1  223.37   13.73
   2   3   2  203.59   12.75
  -2  -3  -2  191.07   12.71
  -2  -3  -2  192.19   12.80
   2  -3   2  202.16   12.78
   2  -3   2  205.53   12.80
   2  -3   2  214.53   12.81
   2  -3   2  201.08   12.86
   2   3   3  742.14   47.26
  -2  -3  -3  745.08   47.26
  -2  -3  -3  761.23   47.31
   2  -3   3  767.24   47.35
   2  -3   3  734.97   47.32
   2  -3   3  779.22   48.07
   2  -3   3  771.39   47.46
   2   3   4 1568.74   99.01
  -2  -3  -4 1584.00   99.87
  -2  -3  -4 1604.03   99.13
  -2  -3  -4 1557.82   99.13
  -2   3  -4 1520.36   98.93
   2  -3   4 1721.99   99.61
   2  -3   4 1627.59   99.18
   2   3   5   10.03    1.41
   2   3   5    9.21    1.10
  -2  -3  -5   15.25    1.22
  -2  -3  -5   13.14    1.23
  -2  -3  -5    7.65    1.58
  -2  -3  -5    7.72    1.02
  -2   3  -5    9.92    1.40
  -2   3  -5   12.19    1.53
  -2   3  -5    8.48    1.00
   2  -3   5   14.45    1.56
   2  -3   5   11.09    1.63
   2  -3   5    9.46    1.23
   2  -3   5   10.04    1.80
   2   3   6   21.74    1.82
   2   3   6   18.33    1.62
  -2  -3  -6   20.48    1.83
  -2  -3  -6   20.74    1.85
  -2  -3  -6   18.11    2.01
  -2   3  -6   20.41    1.93
  -2   3  -6   20.31    1.91
   2  -3   6   17.94    1.86
   2  -3   6   18.92    1.94
   2  -3   6   21.81    2.25
   2   3   7   13.50    1.69
   2   3   7   14.79    1.52
  -2  -3  -7   16.11    1.62
  -2  -3  -7   16.98    1.77
  -2  -3  -7   13.69    1.92
  -2   3  -7   16.90    1.78
  -2   3  -7   16.57    1.83
  -2   3  -7   17.38    1.46
   2  -3   7   16.60    1.89
   2  -3   7   17.27    1.98
   2  -3   7   14.06    1.96
   2   3   8   96.05    6.35
   2   3   8   99.21    6.25
  -2  -3  -8  105.81    6.37
  -2  -3  -8  109.53    6.42
  -2  -3  -8   86.55    6.40
  -2   3  -8   96.23    6.41
  -2   3  -8   95.13    6.42
  -2   3  -8   91.73    6.25
   2  -3   8   92.67    6.41
   2  -3   8   95.93    6.44
   2  -3   8   89.21    6.41
   2   3   9   88.19    5.50
  -2  -3  -9   86.59    5.61
  -2  -3  -9   84.96    5.60
  -2  -3  -9   84.63    5.74
  -2   3  -9   82.84    5.67
  -2   3  -9   80.57    5.67
  -2   3  -9   78.57    5.51
   2  -3   9   75.50    5.69
   2   3  10  152.62   10.04
   2   3  10  167.41    9.86
  -2  -3 -10  145.95    9.97
  -2   3 -10  149.86    9.86
   2  -3  10  147.07   10.00
   2  -3  10  148.45   10.00
   2   3  11   48.71    4.04
   2   3  11   50.67    3.58
  -2  -3 -11   48.87    3.67
  -2  -3 -11   48.91    3.64
  -2  -3 -11   42.93    3.81
  -2   3 -11   48.75    3.70
  -2   3 -11   48.87    3.71
  -2   3 -11   48.68    3.69
   2  -3  11   46.01    3.92
   2  -3  11   46.55    3.97
   2  -3  11   43.73    3.81
   2   3  12   92.73    6.45
  -2  -3 -12   97.94    6.54
  -2  -3 -12  103.78    6.54
  -2   3 -12   98.48    6.56
   2  -3  12   88.36    6.57
   2   3  13   12.05    2.13
  -2  -3 -13   10.74    2.39
  -2   3 -13   13.69    2.39
   2  -3  13   11.22    2.34
   2   3  14   63.85    4.77
  -2  -3 -14   62.40    4.96
   2  -3  14   72.39    4.86
   2   3  15    1.05    2.08
  -2  -3 -15   -4.43    2.42
  -2   3 -15    0.99    2.19
   2  -3  15   -3.27    2.06
   2   3  16    0.22    2.13
  -2  -3 -16    0.46    2.46
  -2   3 -16    0.44    2.27
   2  -3  16    1.51    2.27
  -2  -3 -17    2.63    2.54
  -2   3 -17    6.43    2.45
   2  -3  17    3.21    2.30
  -2  -3 -18    3.04    2.57
   2  -3  19    1.87    2.28
  -2  -3 -20   15.14    2.79
   2  -3  20   15.16    2.58
   2   4   0 2682.32  154.71
   2   4   0 2476.42  154.50
  -2  -4   0 2312.84  154.56
  -2  -4   0 2554.84  154.76
  -2  -4   0 2426.63  154.55
  -2   4   0 2717.44  155.32
  -2   4   0 2726.67  157.50
   2  -4   0 2382.31  154.54
   2  -4   0 2349.36  154.45
   2  -4   0 2533.23  158.14
   2   4   1  226.41   14.01
  -2  -4  -1  207.16   13.95
  -2  -4  -1  232.54   14.06
   2  -4   1  222.17   13.98
   2   4   2  815.12   50.21
  -2  -4  -2  799.55   50.19
  -2  -4  -2  804.87   50.30
   2  -4   2  804.12   50.46
   2  -4   2  796.77   50.47
   2  -4   2  803.53   50.24
   2  -4   2  771.69   50.36
  -2  -4  -3   78.00    4.95
   2  -4   3   73.62    5.05
   2  -4   3   74.44    5.19
   2   4   4   23.38    2.00
  -2  -4  -4   23.68    1.86
  -2  -4  -4   21.31    2.01
   2  -4   4   18.75    2.06
   2  -4   4   19.27    2.02
   2  -4   4   20.64    1.96
   2  -4   4   22.31    2.26
   2   4   5   28.21    2.20
  -2  -4  -5   30.09    2.04
  -2  -4  -5   28.30    2.09
  -2  -4  -5   26.08    2.19
  -2   4  -5   20.21    1.59
   2  -4   5   27.62    2.31
   2  -4   5   30.19    2.32
   2  -4   5   22.71    2.38
   2   4   6   -1.55    1.62
   2   4   6    0.35    0.77
  -2  -4  -6    0.17    1.17
  -2  -4  -6    0.55    1.24
  -2  -4  -6   -0.35    1.55
  -2  -4  -6    0.14    0.74
  -2   4  -6    0.64    1.26
  -2   4  -6    0.15    1.39
  -2   4  -6   -0.92    0.71
  -2   4  -6    0.76    0.65
   2  -4   6    0.06    1.52
   2  -4   6    0.84    1.59
   2  -4   6    0.65    1.76
   2   4   7   -2.29    1.73
   2   4   7    0.00    0.94
  -2  -4  -7    0.27    1.25
  -2  -4  -7    0.96    1.31
  -2  -4  -7    2.50    1.70
  -2   4  -7    0.81    1.41
  -2   4  -7   -2.34    1.57
  -2   4  -7   -1.26    0.93
   2  -4   7    0.00    1.44
   2  -4   7   -1.78    1.66
   2  -4   7    0.53    1.73
   2   4   8  236.36   15.17
  -2  -4  -8  261.45   15.35
  -2  -4  -8  255.49   15.34
  -2  -4  -8  238.89   15.36
  -2   4  -8  248.95   15.44
  -2   4  -8  237.94   15.44
  -2   4  -8  230.27   15.18
   2  -4   8  221.14   15.32
   2  -4   8  239.16   15.37
   2  -4   8  248.40   15.39
   2   4   9  341.94   20.46
   2   4   9  311.21   20.27
  -2  -4  -9  316.25   20.44
  -2   4  -9  325.67   20.53
  -2   4  -9  305.91   20.52
  -2   4  -9  320.88   20.31
   2  -4   9  327.17   20.49
   2  -4   9  329.79   20.47
   2  -4   9  326.15   20.48
   2   4  10  265.42   16.50
  -2  -4 -10  276.36   16.48
  -2  -4 -10  277.54   16.48
  -2  -4 -10  256.08   16.48
  -2   4 -10  256.39   16.53
  -2   4 -10  242.29   16.54
  -2   4 -10  260.41   16.35
   2  -4  10  242.83   16.52
   2  -4  10  241.97   16.51
   2  -4  10  250.58   16.49
   2   4  11    5.96    2.02
   2   4  11    7.53    1.70
  -2  -4 -11    7.79    1.72
  -2  -4 -11    7.01    1.68
  -2  -4 -11    6.65    2.13
  -2   4 -11    4.43    1.74
  -2   4 -11    7.05    1.92
  -2   4 -11    9.91    1.85
   2  -4  11    6.76    2.23
   2  -4  11    6.91    2.26
   2  -4  11    5.13    2.20
   2   4  12   59.75    4.39
  -2  -4 -12   62.87    4.65
  -2   4 -12   61.94    4.58
  -2   4 -12   65.38    4.65
   2   4  13    2.55    1.85
  -2   4 -13    2.52    2.09
   2   4  14   70.85    5.38
  -2   4 -14   82.24    5.53
   2  -4  14   81.72    5.61
  -2  -4 -15    2.15    2.40
  -2   4 -15    2.71    2.15
   2  -4  15   -3.26    2.09
  -2  -4 -16   35.22    3.38
  -2   4 -16   27.89    3.10
   2  -4  16   34.59    3.26
  -2  -4 -17   69.52    5.13
   2  -4  17   60.77    4.90
  -2  -4 -18   10.77    2.65
   2  -4  18   12.74    2.46
  -2  -4 -19   25.50    3.04
   2  -4  20    1.30    2.27
   2   5   0  325.56   19.56
   2   5   0  290.44   19.41
  -2  -5   0  311.93   19.49
  -2  -5   0  323.54   19.57
  -2  -5   0  300.68   19.37
  -2   5   0  325.64   19.59
  -2   5   0  342.51   19.45
   2  -5   0  311.81   19.49
   2  -5   0  288.03   19.36
   2  -5   0  310.15   19.73
   2   5   1  124.41    7.10
  -2  -5  -1  118.95    7.12
  -2   5  -1  119.76    7.20
   2  -5   1  110.46    7.02
   2  -5   1  100.25    6.83
   2  -5   1  117.16    7.20
   2   5   2   44.90    3.45
  -2  -5  -2   45.25    3.46
   2  -5   2   49.75    3.50
   2  -5   2   46.78    3.54
   2  -5   2   50.41    3.40
   2  -5   2   50.61    3.60
   2   5   3   48.83    3.50
  -2  -5  -3   48.21    3.53
   2  -5   3   52.30    3.58
   2  -5   3   46.04    3.53
   2  -5   3   46.41    3.40
   2  -5   3   48.50    3.63
   2   5   4  517.08   32.26
  -2  -5  -4  528.52   32.24
  -2  -5  -4  504.46   32.22
   2  -5   4  515.12   32.29
   2  -5   4  505.18   32.28
   2  -5   4  497.83   32.28
   2   5   5   15.80    1.98
  -2  -5  -5   17.92    1.74
   2  -5   5   14.14    1.95
   2  -5   5   16.30    2.04
   2  -5   5    8.99    2.15
   2   5   6  299.63   19.28
  -2  -5  -6  307.45   19.47
  -2  -5  -6  317.76   19.28
   2  -5   6  302.44   19.31
   2  -5   6  297.45   19.32
   2  -5   6  289.49   19.47
   2  -5   6  309.93   19.35
   2   5   7   17.82    1.81
  -2  -5  -7   31.18    2.26
  -2  -5  -7   30.04    2.31
  -2  -5  -7   31.67    2.45
  -2  -5  -7   23.88    1.79
  -2   5  -7   24.23    1.80
   2  -5   7   31.21    2.62
   2  -5   7   27.45    2.57
   2  -5   7   31.01    2.58
   2   5   8    9.48    2.07
   2   5   8    7.60    1.30
  -2  -5  -8   15.12    1.69
  -2  -5  -8   10.78    1.77
  -2  -5  -8    9.72    1.98
  -2   5  -8   14.48    1.82
  -2   5  -8   11.50    1.86
   2  -5   8   13.54    2.14
   2  -5   8   11.32    2.11
   2  -5   8   10.65    2.07
   2   5   9  196.22   11.55
   2   5   9  166.55   11.21
  -2  -5  -9  197.93   11.47
  -2  -5  -9  178.62   11.44
  -2  -5  -9  168.29   11.44
  -2   5  -9  192.63   11.63
  -2   5  -9  177.86   11.60
   2  -5   9  157.85   11.45
   2  -5   9  171.82   11.49
   2  -5   9  181.79   11.50
   2   5  10    7.68    2.50
   2   5  10    6.50    1.47
  -2  -5 -10   13.65    1.73
  -2  -5 -10    5.71    1.71
  -2  -5 -10    6.65    2.11
  -2   5 -10   12.71    1.92
  -2   5 -10    9.77    1.88
  -2   5 -10   10.42    1.47
   2  -5  10    9.38    2.20
   2  -5  10   11.86    2.26
   2  -5  10    7.07    2.15
   2   5  11  142.16   10.07
  -2  -5 -11  178.00   10.32
  -2  -5 -11  171.78   10.33
  -2  -5 -11  152.88   10.32
  -2   5 -11  158.95   10.12
   2  -5  11  154.19   10.31
   2   5  12   97.23    6.67
  -2   5 -12  106.32    6.77
  -2  -5 -13   -4.47    2.21
  -2   5 -13    1.42    1.93
   2  -5  13    0.01    2.06
  -2  -5 -14  166.32   10.82
  -2   5 -14  163.60   10.73
  -2  -5 -15    0.36    2.25
   2  -5  15    4.68    2.15
  -2  -5 -16   22.82    2.85
   2  -5  16   20.99    2.64
  -2  -5 -17   14.96    2.71
   2  -5  17   17.32    2.58
  -2  -5 -18   18.21    2.76
   2  -5  18   18.84    2.74
  -2  -5 -19   35.89    3.46
   2  -5  19   35.74    3.44
  -2  -6   0  254.10   15.94
  -2  -6   0  256.49   15.97
  -2  -6   0  239.44   15.76
  -2   6   0  266.17   16.02
   2  -6   0  247.82   15.91
   2  -6   0  253.07   15.80
   2  -6   0  264.07   16.09
   2   6   1   54.38    3.33
  -2  -6  -1   52.73    3.14
  -2  -6  -1   50.97    3.29
  -2  -6  -1   45.69    2.75
  -2  -6  -1   37.39    2.77
  -2   6  -1   54.22    3.34
  -2   6  -1   36.78    2.83
   2  -6   1   49.79    3.16
   2  -6   1   42.20    2.83
   2  -6   1   52.59    3.46
   2   6   2  305.27   18.88
  -2  -6  -2  299.96   18.82
  -2  -6  -2  287.23   18.86
   2  -6   2  291.44   19.10
   2  -6   2  300.41   19.13
   2  -6   2  298.83   18.93
   2   6   3  120.60    7.79
  -2  -6  -3  116.45    7.71
  -2  -6  -3  113.93    7.78
   2  -6   3  125.80    7.84
   2  -6   3  121.95    7.88
   2  -6   3  114.00    7.86
   2   6   4  398.83   24.87
  -2  -6  -4  409.27   24.86
  -2  -6  -4  393.66   24.86
   2  -6   4  392.52   24.92
   2  -6   4  405.00   24.94
   2  -6   4  376.19   24.84
   2  -6   4  378.26   24.90
   2   6   5  410.86   25.28
  -2  -6  -5  407.29   25.24
  -2  -6  -5  378.65   25.23
   2  -6   5  397.95   25.32
   2  -6   5  408.90   25.32
   2  -6   5  394.77   25.28
   2  -6   5  397.26   25.31
  -2  -6  -6  294.97   17.74
  -2  -6  -6  258.50   17.73
   2  -6   6  283.35   17.82
   2   6   7    3.67    2.02
  -2  -6  -7    2.70    1.84
  -2   6  -7    1.90    0.55
   2  -6   7    3.53    2.00
   2  -6   7    3.52    2.12
   2  -6   7    3.13    1.90
   2  -6   7    4.46    1.94
   2   6   8  106.13    5.90
   2   6   8   68.10    5.30
  -2  -6  -8   99.61    5.70
  -2  -6  -8  104.55    5.73
  -2   6  -8   72.95    5.30
   2  -6   8   94.29    5.89
   2  -6   8   98.37    5.96
   2  -6   8   99.50    5.85
   2  -6   8  103.12    5.83
   2   6   9   33.64    2.91
  -2  -6  -9   29.33    2.56
  -2  -6  -9   29.94    2.56
  -2  -6  -9   30.86    2.81
  -2   6  -9   26.33    2.11
   2  -6   9   28.43    2.81
   2  -6   9   33.10    2.98
   2  -6   9   26.15    2.81
  -2  -6 -10  430.87   24.54
  -2  -6 -10  450.69   24.54
  -2  -6 -10  418.30   24.50
  -2   6 -10  324.49   24.22
   2  -6  10  402.41   24.51
  -2   6 -11    1.30    1.34
  -2  -6 -12   42.10    3.59
   2  -6  12   42.39    3.54
  -2  -6 -13   33.07    3.25
   2  -6  13   35.16    3.16
  -2  -6 -14  221.59   14.11
   2  -6  14  214.20   14.09
  -2  -6 -15   24.84    2.94
   2  -6  15   25.84    2.91
  -2  -6 -16   65.39    4.95
   2  -6  17   -6.04    2.32
  -2  -6 -18   54.90    4.35
   2  -6  18   51.36    4.23
  -2  -6 -19    2.00    2.36
   2  -6  19    0.48    2.33
   2   7   0   15.71    2.07
  -2  -7   0   12.84    1.63
  -2  -7   0   11.55    1.78
  -2  -7   0   11.43    1.23
  -2   7   0   14.04    1.71
   2  -7   0   15.12    1.67
   2  -7   0   12.13    1.34
   2  -7   0   12.00    2.15
   2   7   1    9.55    1.98
  -2  -7  -1    8.86    1.50
  -2  -7  -1    8.10    1.77
  -2  -7  -1    7.22    0.83
  -2  -7  -1    5.99    0.78
  -2   7  -1    7.28    1.67
   2  -7   1    7.58    1.52
   2  -7   1    7.89    0.98
   2  -7   1    6.01    1.90
   2   7   2  750.36   45.04
  -2  -7  -2  730.98   45.01
  -2  -7  -2  683.43   45.00
   2  -7   2  712.42   45.79
   2  -7   2  703.41   45.76
   2  -7   2  697.60   44.96
   2  -7   2  730.91   45.13
   2   7   3  191.33   11.43
  -2  -7  -3  186.74   11.33
  -2  -7  -3  165.66   11.34
   2  -7   3  164.26   11.44
   2  -7   3  173.01   11.49
   2  -7   3  168.60   11.31
   2  -7   3  185.32   11.45
  -2  -7  -4  522.59   31.91
  -2  -7  -4  496.02   31.93
   2  -7   4  497.47   31.91
   2  -7   4  506.87   31.99
   2   7   5   86.68    5.96
  -2  -7  -5   90.26    5.93
   2  -7   5   87.60    6.02
   2  -7   5   83.25    6.03
   2  -7   5   79.30    5.85
   2  -7   5   91.67    6.05
   2   7   6  379.60   23.67
  -2  -7  -6  388.99   23.65
  -2  -7  -6  376.60   23.65
   2  -7   6  362.21   23.72
   2  -7   6  364.32   23.70
   2  -7   6  365.36   23.64
   2  -7   6  369.29   23.67
   2   7   7    0.73    2.21
  -2  -7  -7    2.01    1.50
  -2  -7  -7    2.91    1.55
  -2  -7  -7    0.00    1.92
   2  -7   7    2.50    2.17
   2  -7   7    4.21    2.16
   2  -7   7    1.54    1.92
   2  -7   7    1.30    2.05
   2   7   8    0.49    2.33
  -2  -7  -8    2.20    1.49
  -2  -7  -8    2.13    1.67
  -2  -7  -8    1.74    1.97
   2  -7   8    0.00    2.25
   2  -7   8    1.26    2.36
   2  -7   8    1.74    2.07
  -2  -7  -9   69.45    4.53
  -2  -7  -9   62.56    4.47
  -2  -7  -9   52.50    4.53
   2  -7   9   63.84    4.69
  -2  -7 -11    4.22    2.03
   2  -7  11    2.94    2.19
  -2  -7 -12  231.89   14.69
   2  -7  12  223.45   14.69
  -2  -7 -13   12.87    2.31
   2  -7  13   12.86    2.32
  -2  -7 -14  187.17   12.01
   2  -7  14  180.99   12.02
  -2  -7 -15   13.66    2.36
   2  -7  15    9.83    2.46
  -2  -7 -16    0.16    2.22
   2  -7  16    1.60    2.18
  -2  -7 -17    3.78    2.32
   2  -7  17    4.98    2.18
  -2  -7 -18    2.49    2.33
   2   8   0   11.75    2.31
  -2  -8   0   10.24    1.62
  -2  -8   0   12.41    1.91
  -2  -8   0    7.01    1.16
  -2   8   0   13.53    1.81
   2  -8   0    8.76    1.69
   2   8   1   70.51    4.26
  -2  -8  -1   55.17    3.90
  -2  -8  -1   50.87    3.54
  -2   8  -1   62.38    4.13
   2  -8   1   60.51    3.94
   2  -8   1   48.70    3.61
   2  -8   1   61.02    4.22
   2   8   2   99.75    5.29
  -2   8  -2   59.82    4.60
   2  -8   2   94.51    5.42
   2  -8   2   86.29    5.32
   2  -8   2   85.39    5.06
   2  -8   2   71.62    4.69
   2  -8   2   97.29    5.29
   2   8   3  113.91    7.21
  -2  -8  -3  103.38    7.03
   2  -8   3  102.00    7.18
   2  -8   3  105.21    7.24
   2  -8   3  103.64    6.99
   2  -8   3  102.45    7.11
   2   8   4  741.27   42.90
  -2  -8  -4  684.73   42.74
  -2  -8  -4  635.57   42.75
   2  -8   4  699.69   42.94
   2  -8   4  655.05   42.93
   2  -8   4  654.48   42.72
   2  -8   4  703.18   42.85
   2   8   5   49.12    3.99
  -2  -8  -5   51.04    3.63
  -2  -8  -5   47.75    3.75
   2  -8   5   48.04    3.98
   2  -8   5   48.36    4.00
   2  -8   5   46.07    3.76
   2  -8   5   48.69    4.00
   2   8   6  464.69   28.15
  -2  -8  -6  434.13   28.04
  -2  -8  -6  431.63   28.02
   2  -8   6  434.81   28.16
   2  -8   6  452.94   28.17
   2  -8   6  445.49   28.10
  -2  -8  -7   81.50    5.49
  -2  -8  -7   73.25    5.51
   2  -8   7   77.86    5.56
   2  -8   7   79.98    5.53
  -2  -8  -8   19.52    2.54
   2  -8   8   24.36    2.59
   2  -8   8   20.89    2.68
  -2  -8  -9    0.76    2.05
   2  -8   9    2.39    2.16
  -2  -8 -10    8.94    2.30
   2  -8  10    6.26    2.24
  -2  -8 -11   12.19    2.40
   2  -8  12   18.57    2.66
   2  -8  13   11.28    2.36
  -2  -8 -14  121.36    7.91
   2  -8  14  111.72    7.96
  -2  -8 -15    2.46    2.30
   2  -8  15    1.38    2.27
  -2  -8 -16   81.25    5.88
   2  -8  16   83.43    5.87
  -2  -8 -17    0.31    2.24
   2  -8  17    0.08    2.24
   2   9   0   19.51    2.60
  -2  -9   0   15.97    1.88
  -2  -9   0   13.57    2.09
  -2   9   0   15.39    2.24
   2  -9   0   13.28    2.07
   2  -9   0   12.45    1.62
   2  -9   0   15.52    2.52
   2   9   1  183.52   10.43
  -2  -9  -1  169.36   10.17
  -2  -9  -1  169.38   10.20
  -2  -9  -1  133.54    9.86
  -2   9  -1  171.53   10.43
   2  -9   1  169.26   10.16
   2  -9   1  155.47    9.95
   2  -9   1  176.90   10.33
   2   9   2  435.08   24.73
  -2  -9  -2  417.09   24.57
  -2  -9  -2  402.64   24.56
   2  -9   2  429.49   25.17
   2  -9   2  409.74   25.12
   2  -9   2  330.19   24.37
   2  -9   2  402.43   24.62
   2   9   3   21.68    2.91
  -2  -9  -3   18.14    2.07
  -2  -9  -3   18.83    2.42
   2  -9   3   17.38    2.79
   2  -9   3   25.14    2.84
   2   9   4  233.68   13.68
  -2  -9  -4  209.81   13.50
   2  -9   4  209.70   13.67
   2  -9   4  199.06   13.69
   2  -9   4  203.66   13.49
   2  -9   4  204.56   13.57
  -2  -9  -5   28.75    2.49
  -2  -9  -5   23.85    2.66
   2  -9   5   23.85    2.64
   2  -9   5   27.02    2.98
  -2  -9  -6    3.65    2.04
   2  -9   6    4.20    2.06
   2  -9   6    5.98    2.22
  -2  -9  -8   10.03    2.21
   2  -9   8   10.73    2.30
  -2  -9  -9   77.05    5.43
   2  -9   9   74.47    5.48
  -2  -9 -10   49.28    4.19
   2  -9  10   56.47    4.22
  -2  -9 -11   -0.42    2.22
   2  -9  11    0.70    2.28
  -2  -9 -12  143.89    9.50
   2  -9  12  141.48    9.49
  -2  -9 -13   11.77    2.43
  -2  -9 -14    2.06    2.20
   2  -9  15   23.40    2.87
  -2  -9 -16    0.25    2.42
   2  -9  16    1.36    2.19
  -2 -10   0  219.41   14.63
  -2 -10   0  232.07   14.64
  -2 -10   0  206.05   14.37
  -2  10   0  259.68   14.81
   2 -10   0  240.47   14.59
   2 -10   0  225.69   14.47
   2 -10   0  255.49   14.78
  -2 -10  -1   -1.07    1.68
  -2 -10  -1    1.10    1.94
  -2  10  -1    1.80    2.02
   2 -10   1    2.11    1.76
   2 -10   1    1.44    2.41
  -2 -10  -2  144.01    9.63
   2 -10   2  144.23    9.60
   2 -10   2  155.49    9.79
  -2 -10  -3   15.79    2.35
   2 -10   3    9.08    2.27
   2 -10   3   10.85    2.58
  -2 -10  -4    6.58    2.31
   2 -10   4    7.24    2.46
   2 -10   7   27.43    2.96
  -2 -10  -8   94.98    6.16
   2 -10   8   82.57    6.19
  -2 -10  -9   17.79    2.46
   2 -10   9   13.62    2.53
  -2 -10 -10   16.30    2.56
   2 -10  10   15.01    2.57
  -2 -10 -11   41.33    3.58
   2 -10  11   39.67    3.64
  -2 -10 -12    8.84    2.28
   2 -10  12    9.68    2.44
  -2 -10 -13   11.51    2.52
   2 -10  13    9.86    2.40
  -2 -10 -14   46.95    3.95
   2 -10  14   46.42    3.97
  -2 -10 -15   64.02    4.80
   2 -10  15   61.81    4.82
  -2 -11   0   35.64    3.37
   2 -11   0   38.91    3.63
  -2 -11  -1    6.56    2.06
   2 -11   1    6.10    2.54
  -2 -11  -2   23.00    2.68
   2 -11   2   23.10    2.90
  -2 -11  -3    0.43    2.04
  -2 -11  -4   59.11    4.52
   2 -11   4   57.99    4.65
  -2 -11  -5   57.99    4.19
   2 -11   5   48.78    4.35
  -2 -11  -6   28.88    2.91
   2 -11   6   27.24    3.14
  -2 -11  -7   52.13    3.99
   2 -11   7   47.06    4.05
  -2 -11  -8   98.78    6.79
   2 -11  10    1.61    2.33
  -2 -11 -11    1.37    2.25
   2 -11  11    0.20    2.32
  -2 -11 -12   40.23    3.56
   2 -11  12   38.56    3.54
  -2 -11 -13   43.55    3.78
   2 -11  13   43.71    3.74
  -2 -11 -14    1.83    2.34
   2 -11  14    2.09    2.42
  -2 -12   0  114.06    7.71
  -2 -12  -1   33.37    3.27
   2 -12   2  183.56   12.05
  -2 -12  -3   44.67    3.66
   2 -12   3   43.20    3.98
  -2 -12  -4    4.05    2.13
   2 -12   4    6.15    2.57
  -2 -12  -5   51.66    4.10
   2 -12   5   46.15    4.18
  -2 -12  -6   27.08    2.92
   2 -12   6   25.01    3.07
  -2 -12  -7    6.32    2.33
   2 -12   7   16.19    2.57
  -2 -12  -8   31.38    3.18
   2 -12   8   35.26    3.35
  -2 -12  -9   25.39    2.82
   2 -12   9   22.82    3.00
  -2 -12 -10    6.14    2.17
   2 -12  10    6.70    2.45
  -2 -12 -11   19.72    2.60
   2 -12  11   24.31    2.92
  -2 -12 -12   -1.59    2.09
   2 -12  13   14.71    2.51
  -2 -13   0   14.32    2.43
   2 -13   0    9.56    2.72
  -2 -13  -1   10.07    2.40
   2 -13   1    8.19    2.65
  -2 -13  -2   52.19    4.22
   2 -13   2   54.27    4.47
  -2 -13  -3   -4.91    2.36
   2 -13   3    0.49    2.57
  -2 -13  -4   61.94    4.79
   2 -13   4   64.94    5.00
  -2 -13  -6    4.52    2.29
   2 -13   6    2.23    2.57
  -2 -13  -7    9.82    2.42
   2 -13   7   11.46    2.61
  -2 -13  -8    8.45    2.40
   2 -13   8   10.79    2.70
  -2 -13  -9   26.00    3.00
   2 -13   9   32.12    3.17
  -2 -13 -10   -4.52    2.27
   2 -13  10    1.74    2.32
  -2 -13 -11   12.23    2.42
   2 -13  11   12.41    2.64
  -2 -14  -1    1.83    2.26
   2 -14   1    2.33    2.66
  -2 -14  -2    1.37    2.27
   2 -14   2    1.31    2.69
  -2 -14  -3   23.96    2.88
   2 -14   3   23.47    3.18
  -2 -14  -4   13.11    2.59
   2 -14   4   17.06    2.79
  -2 -14  -5   48.80    4.11
   2 -14   5   49.89    4.22
  -2 -14  -6   27.69    2.97
   2 -14   6   25.29    3.16
  -2 -14  -7   -5.09    2.36
   2 -14   7    1.73    2.50
  -2 -14  -8   31.99    3.41
   2 -14   8   40.87    3.54
  -2 -14 -10    9.05    2.52
   2 -14  10   10.65    2.64
  -2 -15   0   23.21    2.75
   2 -15   0   17.24    3.06
  -2 -15  -1   58.83    4.54
   2 -15   1   55.80    4.74
  -2 -15  -2   83.99    5.79
   2 -15   2   75.51    5.95
   2 -15   3   38.68    3.74
  -2 -15  -4   40.30    3.72
  -2 -15  -5    3.00    2.41
   2 -15   5    7.11    2.59
  -2 -15  -6    9.44    2.37
   2 -15   6    6.15    2.63
  -2 -15  -7    7.14    2.30
   2 -15   7    4.45    2.55
   2 -15   8   16.98    2.76
  -2 -16  -2    9.99    2.46
  -2 -16  -3    4.39    2.39
   2 -16   3    1.40    2.56
  -2 -16  -4    2.86    2.29
   2 -16   4    2.84    2.58
   2 -16   5   28.28    3.24
  -3   0   0   94.23    6.26
  -3   0  -1   -0.15    0.61
  -3   0  -1   -0.12    0.66
   3   0   2 1261.16   86.40
   3   0   2 1297.40   85.98
   3   0   2 1374.23   86.75
  -3   0  -2 1422.76   86.01
  -3   0  -2 1435.76   86.02
  -3   0  -2 1425.96   86.18
   3   0   3    0.01    0.93
   3   0   3   -1.76    1.00
   3   0   3    1.56    1.42
  -3   0  -3    1.04    0.84
  -3   0  -3   -0.33    0.87
  -3   0  -3    0.02    1.21
   3   0   4  628.65   38.05
  -3   0  -4  613.07   37.99
  -3   0  -4  601.03   37.98
  -3   0  -4  580.40   38.00
   3   0   5    0.44    1.19
   3   0   5    1.53    1.29
   3   0   5    0.31    1.45
  -3   0  -5   -0.47    1.24
   3   0   6  174.22   11.18
   3   0   6  171.30   11.16
   3   0   6  178.76   11.20
  -3   0  -6  182.04   11.16
  -3   0  -6  181.57   11.16
  -3   0  -6  161.37   11.13
   3   0   7   -3.09    1.52
   3   0   7    0.44    1.54
   3   0   7   -2.20    1.63
  -3   0  -7    0.22    1.24
  -3   0  -7    0.87    1.34
  -3   0  -7    0.16    1.46
  -3   0  -8  417.26   26.21
  -3   0  -8  424.39   26.22
  -3   0  -8  403.76   26.16
   3   0   9    1.43    1.81
   3   0   9    0.83    1.97
  -3   0  -9    0.43    1.71
   3   0  10  181.41   12.38
   3   0  10  188.84   12.38
   3   0  10  192.09   12.32
  -3   0 -10  190.96   12.32
  -3   0 -10  200.97   12.34
   3   0  11    0.00    2.03
  -3   0 -11    0.70    1.53
  -3   0 -11    0.53    1.58
  -3   0 -11    2.68    1.99
   3   0  12  436.98   26.98
  -3   0 -12  414.97   26.95
   3   0  13    0.82    2.22
  -3   0 -13   -3.18    2.21
   3   0  14   16.82    2.57
  -3   0 -14   17.94    2.61
   3   0  16   70.88    5.31
  -3   0 -16   75.66    5.43
   3   0  17   -6.76    2.30
  -3   0 -17    0.99    2.41
   3   0  18   10.84    2.47
  -3   0 -18   11.49    2.59
  -3   0 -19    1.61    2.49
   3   1   0    6.96    0.64
  -3  -1   0    6.95    1.34
  -3  -1   0    6.50    1.19
  -3   1   0    4.38    1.22
   3  -1   0    6.21    0.65
   3   1   1  199.75   12.64
  -3  -1  -1  196.73   12.63
  -3  -1  -1  198.73   12.63
  -3  -1  -1  209.65   12.80
  -3   1  -1  196.26   12.73
   3  -1   1  203.53   12.65
   3  -1   1  198.06   12.65
   3  -1   1  212.17   12.71
   3   1   2   97.61    6.55
   3   1   2  101.86    6.71
  -3  -1  -2   99.46    6.55
  -3  -1  -2  101.79    6.55
  -3  -1  -2  100.30    6.67
  -3   1  -2  102.67    6.60
  -3   1  -2  107.67    6.63
  -3   1  -2  112.19    6.63
   3  -1   2  102.29    6.56
   3  -1   2  104.88    6.57
   3  -1   2  105.41    6.75
   3   1   3   20.16    1.85
   3   1   3   28.10    1.91
  -3  -1  -3   21.88    1.76
  -3  -1  -3   23.58    1.77
  -3   1  -3   23.38    1.78
  -3   1  -3   25.07    1.84
  -3   1  -3   24.49    1.92
   3  -1   3   22.88    1.83
   3  -1   3   24.25    1.85
   3  -1   3   22.58    2.21
   3   1   4  346.33   22.75
  -3  -1  -4  365.39   22.76
  -3  -1  -4  382.95   22.77
  -3  -1  -4  334.60   22.81
  -3   1  -4  377.24   22.82
  -3   1  -4  377.51   22.82
  -3   1  -4  347.26   22.77
   3  -1   4  350.84   22.76
   3  -1   4  368.54   22.77
   3  -1   4  372.60   22.90
   3   1   5   42.25    3.03
   3   1   5   44.64    3.06
  -3  -1  -5   39.20    3.11
  -3   1  -5   43.96    3.00
  -3   1  -5   43.22    3.00
   3  -1   5   36.81    3.00
   3  -1   5   45.34    3.06
   3  -1   5   45.06    3.25
   3   1   6  533.65   35.98
   3   1   6  569.14   35.36
  -3  -1  -6  623.26   35.40
  -3  -1  -6  581.88   35.35
  -3  -1  -6  547.63   35.37
  -3   1  -6  567.91   35.39
  -3   1  -6  581.97   35.39
  -3   1  -6  541.44   35.31
   3  -1   6  528.23   35.35
   3  -1   6  541.58   35.36
   3  -1   6  567.22   35.43
   3   1   7  153.17    9.70
   3   1   7  148.96    9.57
   3   1   7  152.88    9.53
  -3  -1  -7  160.46    9.52
  -3  -1  -7  152.65    9.50
  -3  -1  -7  146.09    9.56
  -3   1  -7  144.48    9.52
  -3   1  -7  152.98    9.53
  -3   1  -7  135.46    9.47
   3  -1   7  135.44    9.52
   3  -1   7  142.98    9.56
   3  -1   7  151.39    9.59
   3   1   8   66.77    4.52
  -3  -1  -8   65.69    4.48
  -3  -1  -8   65.91    4.45
  -3  -1  -8   61.61    4.52
  -3   1  -8   64.07    4.47
  -3   1  -8   65.32    4.48
   3  -1   8   63.89    4.59
   3   1   9  201.61   12.77
   3   1   9  203.49   12.61
   3   1   9  209.53   12.56
  -3  -1  -9  200.40   12.53
  -3   1  -9  185.32   12.52
  -3   1  -9  191.31   12.52
  -3   1  -9  193.56   12.50
   3  -1   9  186.83   12.55
   3  -1   9  184.83   12.59
   3  -1   9  198.13   12.57
   3   1  10    8.23    1.98
   3   1  10    6.90    2.22
   3   1  10    9.73    2.00
  -3  -1 -10   10.50    1.61
  -3  -1 -10    7.37    1.71
  -3  -1 -10    7.69    2.03
  -3   1 -10    9.90    1.79
  -3   1 -10    7.49    1.70
  -3   1 -10    9.23    1.97
   3  -1  10    7.11    2.05
   3  -1  10    9.99    2.34
   3  -1  10    8.99    2.13
   3   1  11    8.16    2.10
  -3  -1 -11   11.31    1.77
  -3  -1 -11    8.22    1.78
  -3  -1 -11    7.88    2.10
  -3   1 -11    7.32    1.82
  -3   1 -11    8.66    1.76
  -3   1 -11    9.20    2.05
   3   1  12   39.23    3.34
  -3   1 -12   37.78    3.35
   3  -1  12   42.54    3.51
   3   1  13    0.53    2.15
  -3  -1 -13   -2.10    2.21
  -3   1 -13   -3.37    2.14
   3  -1  13    1.49    2.19
   3   1  14  160.26   10.38
  -3  -1 -14  157.60   10.45
  -3   1 -14  156.13   10.41
   3  -1  14  160.73   10.44
   3   1  15    8.80    2.31
  -3  -1 -15    9.11    2.44
  -3   1 -15    9.55    2.42
   3  -1  15    7.89    2.41
   3   1  16  280.56   17.84
  -3  -1 -16  265.77   17.87
  -3   1 -16  278.02   17.89
   3  -1  16  291.14   17.90
   3   1  17    7.39    2.39
  -3  -1 -17    8.70    2.53
  -3   1 -17    6.82    2.45
  -3   1 -18   12.27    2.63
   3  -1  18   10.94    2.51
  -3  -1 -19   14.79    2.69
   3  -1  19   12.42    2.53
  -3  -1 -20   28.84    3.20
   3  -1  20   32.03    3.22
   3   2   0   60.44    3.73
  -3  -2   0   51.24    3.68
  -3  -2   0   59.98    3.94
  -3  -2   0   61.08    3.82
   3  -2   0   59.84    3.74
   3  -2   0   59.00    3.76
   3  -2   0   54.48    3.70
   3   2   1  128.69    7.93
  -3  -2  -1  114.94    7.93
  -3  -2  -1  120.17    7.91
  -3  -2  -1  127.30    8.05
  -3   2  -1  129.02    8.05
   3  -2   1  130.23    7.95
   3  -2   1  125.22    7.94
   3  -2   1  124.35    7.93
   3  -2   1  131.34    8.28
   3   2   2  857.34   52.45
   3   2   2  828.75   52.77
  -3  -2  -2  823.33   52.46
  -3  -2  -2  830.94   52.40
  -3  -2  -2  878.02   52.55
  -3   2  -2  803.22   52.49
   3  -2   2  851.09   52.50
   3  -2   2  820.08   52.48
   3  -2   2  857.15   52.76
   3  -2   2  837.48   52.86
  -3  -2  -3   18.38    1.44
  -3  -2  -3   17.40    1.50
  -3  -2  -3   15.58    1.83
  -3   2  -3   16.67    1.53
  -3   2  -3   17.77    1.58
  -3   2  -3   19.31    1.42
   3  -2   3   17.68    2.09
   3   2   4  525.07   31.79
   3   2   4  509.13   31.78
  -3  -2  -4  493.19   31.77
  -3  -2  -4  510.33   31.88
   3  -2   4  502.94   31.80
   3  -2   4  496.21   31.80
   3   2   5   10.93    1.41
   3   2   5   13.65    1.38
  -3  -2  -5   12.47    1.36
  -3  -2  -5   14.01    1.44
  -3   2  -5   15.11    1.49
  -3   2  -5   14.48    1.52
   3  -2   5   14.02    1.53
   3  -2   5   11.59    1.54
   3  -2   5   11.29    1.99
   3   2   6  406.51   25.55
  -3  -2  -6  413.91   25.52
  -3  -2  -6  430.13   25.53
  -3   2  -6  419.75   25.59
  -3   2  -6  404.76   25.58
  -3   2  -6  384.34   25.44
   3  -2   6  396.57   25.54
   3  -2   6  388.12   25.54
   3  -2   6  414.00   25.63
   3   2   7  251.47   15.74
   3   2   7  260.07   15.68
  -3  -2  -7  247.61   15.68
  -3  -2  -7  255.64   15.69
  -3  -2  -7  239.59   15.72
  -3   2  -7  243.23   15.73
  -3   2  -7  253.57   15.75
  -3   2  -7  240.42   15.61
   3  -2   7  238.45   15.70
   3  -2   7  244.63   15.73
   3  -2   7  242.11   15.76
   3   2   8  135.77    9.23
   3   2   8  137.07    9.12
  -3  -2  -8  139.91    9.15
  -3  -2  -8  152.10    9.19
  -3  -2  -8  133.11    9.18
  -3   2  -8  141.28    9.19
  -3   2  -8  141.54    9.18
  -3   2  -8  139.02    9.06
   3  -2   8  140.22    9.21
   3  -2   8  146.26    9.23
   3  -2   8  154.93    9.27
   3   2   9   67.05    4.75
   3   2   9   68.01    4.58
  -3  -2  -9   66.92    4.50
  -3  -2  -9   62.94    4.52
  -3  -2  -9   66.95    4.67
  -3   2  -9   65.54    4.63
  -3   2  -9   69.20    4.66
  -3   2  -9   63.67    4.49
   3  -2   9   60.66    4.66
   3  -2   9   64.87    4.82
   3  -2   9   69.24    4.77
   3   2  10   45.98    3.61
   3   2  10   39.31    3.33
  -3  -2 -10   43.86    3.31
  -3  -2 -10   42.17    3.30
  -3  -2 -10   44.17    3.44
  -3   2 -10   44.50    3.40
  -3   2 -10   45.30    3.40
  -3   2 -10   42.59    3.33
   3  -2  10   45.49    3.58
   3  -2  10   42.11    3.67
   3  -2  10   43.54    3.57
  -3  -2 -11   49.95    3.49
  -3  -2 -11   45.99    3.47
  -3  -2 -11   37.98    3.62
  -3   2 -11   47.86    3.57
  -3   2 -11   45.09    3.57
  -3   2 -11   43.13    3.50
   3  -2  11   42.58    3.67
   3   2  12  379.01   23.25
  -3  -2 -12  364.36   23.31
  -3   2 -12  363.03   23.24
   3  -2  12  358.43   23.32
   3   2  13    0.08    2.01
  -3  -2 -13    2.17    2.23
   3   2  14  170.48   10.75
  -3   2 -14  157.51   10.74
   3  -2  14  166.90   10.81
   3   2  15   40.01    3.62
  -3  -2 -15   41.02    3.71
  -3   2 -15   38.73    3.61
   3  -2  15   50.24    3.63
  -3  -2 -16    7.25    2.52
  -3   2 -16   10.20    2.40
   3  -2  16   10.07    2.48
  -3  -2 -17    9.80    2.59
   3  -2  17   13.26    2.54
  -3  -2 -18    3.44    2.45
   3  -2  18   -2.45    2.41
   3  -2  19   18.46    2.71
  -3  -2 -20   18.29    2.72
   3  -2  20   23.49    2.82
   3   3   0  362.49   21.49
  -3  -3   0  324.83   21.43
  -3  -3   0  349.57   21.59
  -3  -3   0  330.05   21.46
   3  -3   0  353.18   21.65
   3  -3   0  360.17   21.68
   3  -3   0  332.06   21.44
   3   3   1   61.92    4.11
  -3  -3  -1   63.67    4.05
  -3  -3  -1   69.72    4.28
   3  -3   1   65.47    4.08
   3  -3   1   69.42    4.10
   3  -3   1   52.27    3.98
   3  -3   1   65.41    4.38
   3   3   2 1714.27  102.25
   3   3   2 1726.26  101.98
  -3  -3  -2 1645.91  104.12
  -3  -3  -2 1664.17  101.95
  -3  -3  -2 1828.26  102.17
   3  -3   2 1767.19  102.13
   3  -3   2 1743.01  102.11
   3  -3   2 1720.85  102.09
   3  -3   2 1245.06  101.80
   3  -3   2 1742.50  102.68
   3   3   3    0.58    1.16
   3   3   3    0.15    0.77
   3   3   3    0.46    0.75
  -3  -3  -3    0.04    0.93
  -3  -3  -3    0.10    0.97
  -3  -3  -3    3.14    1.46
  -3   3  -3    0.08    0.52
   3  -3   3    1.21    1.21
   3  -3   3   -0.80    1.28
   3  -3   3   -0.80    0.63
   3  -3   3    0.25    1.73
   3   3   4   30.71    2.27
   3   3   4   30.66    2.00
  -3  -3  -4   32.61    2.16
  -3  -3  -4   28.40    2.17
  -3  -3  -4   25.93    2.42
  -3   3  -4   27.51    1.93
   3  -3   4   29.75    2.32
   3  -3   4   30.55    2.36
   3  -3   4   27.58    2.20
   3  -3   4   27.38    2.01
   3  -3   4   26.38    2.61
   3   3   5   93.33    6.41
   3   3   5   97.92    6.27
  -3  -3  -5  100.45    6.35
  -3  -3  -5  101.94    6.37
  -3  -3  -5   86.65    6.44
  -3   3  -5  101.83    6.46
  -3   3  -5   97.04    6.46
  -3   3  -5   96.92    6.23
   3  -3   5   98.44    6.39
   3  -3   5   98.89    6.43
   3  -3   5  101.76    6.56
   3   3   6  568.72   35.16
   3   3   6  527.04   35.04
  -3  -3  -6  603.23   35.18
  -3  -3  -6  606.51   35.19
  -3  -3  -6  551.38   35.17
  -3   3  -6  571.33   35.35
  -3   3  -6  590.17   35.41
  -3   3  -6  527.96   35.03
   3  -3   6  544.19   35.16
   3  -3   6  561.48   35.17
   3   3   7    3.60    1.21
  -3  -3  -7    2.88    1.30
  -3  -3  -7    2.86    1.34
  -3  -3  -7    3.82    1.75
  -3   3  -7    2.61    1.44
  -3   3  -7    1.53    1.39
  -3   3  -7    3.21    0.93
   3  -3   7    3.07    1.96
   3   3   8   21.43    1.90
  -3   3  -8    8.43    1.36
   3  -3   8   15.73    2.15
   3  -3   8   12.57    2.08
   3  -3   8   14.14    2.11
   3   3   9   81.49    5.46
   3   3   9   84.22    5.32
  -3  -3  -9   77.77    5.42
  -3  -3  -9   87.73    5.45
  -3  -3  -9   76.85    5.50
  -3   3  -9   78.46    5.47
  -3   3  -9   75.26    5.47
  -3   3  -9   76.77    5.23
   3  -3   9   77.12    5.62
   3  -3   9   79.23    5.58
   3  -3   9   80.65    5.56
   3   3  10   84.67    5.80
   3   3  10   83.95    5.66
  -3  -3 -10   94.30    5.79
  -3  -3 -10   85.46    5.79
  -3  -3 -10   77.63    5.84
  -3   3 -10   84.94    5.83
  -3   3 -10   84.50    5.85
   3  -3  10   76.73    5.94
   3  -3  10   86.29    6.00
   3  -3  10   86.51    5.92
   3   3  11   47.01    3.43
  -3  -3 -11   39.12    3.53
  -3   3 -11   42.95    3.39
   3  -3  11   50.63    3.74
   3   3  12   33.34    2.78
  -3  -3 -12   29.07    2.91
  -3   3 -12   28.13    2.72
   3  -3  12   30.70    3.11
   3   3  13    6.26    2.07
  -3   3 -13    9.15    2.00
   3  -3  13   12.10    2.18
  -3  -3 -14  188.48   11.67
  -3   3 -14  172.74   11.55
   3  -3  14  175.38   11.63
  -3  -3 -15    7.59    2.38
   3  -3  16   86.68    6.09
  -3  -3 -17    2.58    2.28
   3  -3  17    1.87    2.41
  -3  -3 -18    3.23    2.23
   3  -3  18   -0.41    2.38
  -3  -3 -19    8.58    2.34
   3  -3  19    7.99    2.46
   3  -3  20    0.19    2.31
   3   4   0   46.52    2.99
  -3  -4   0   43.07    2.87
  -3  -4   0   47.92    3.13
   3  -4   0   42.41    2.79
   3  -4   0   36.65    2.76
   3  -4   0   43.10    3.23
   3   4   1  173.18   10.41
   3   4   1  158.70   10.25
  -3  -4  -1  160.18   10.47
   3  -4   1  162.54   10.45
   3  -4   1  163.83   10.46
   3  -4   1  169.94   10.62
   3   4   2  679.51   42.10
  -3  -4  -2  665.15   42.14
   3  -4   2  698.36   42.15
   3  -4   2  685.57   42.15
   3  -4   2  638.96   42.07
   3  -4   2  659.44   42.30
   3   4   3   26.65    2.17
  -3  -4  -3   27.57    2.05
  -3  -4  -3   27.28    2.37
   3  -4   3   24.76    2.22
   3  -4   3   27.57    2.27
   3  -4   3   22.59    2.07
   3  -4   3   22.24    2.48
   3   4   4  793.95   48.56
  -3  -4  -4  759.84   48.84
  -3  -4  -4  814.38   48.56
  -3  -4  -4  740.29   48.58
   3  -4   4  784.58   48.56
   3  -4   4  750.66   48.53
   3  -4   4  748.15   48.70
   3  -4   4  782.34   48.68
   3   4   5    9.06    1.60
  -3  -4  -5    7.40    1.29
  -3  -4  -5   10.57    1.36
  -3  -4  -5    7.53    1.72
   3  -4   5    8.67    1.72
   3  -4   5    6.06    1.75
   3  -4   5    9.50    1.47
   3  -4   5    4.69    1.98
   3   4   6  380.37   25.86
   3   4   6  357.38   25.91
  -3  -4  -6  480.76   26.14
  -3  -4  -6  507.82   26.13
  -3  -4  -6  486.17   26.17
   3  -4   6  471.16   26.24
   3   4   7  199.34   11.71
   3   4   7  170.59   11.43
  -3  -4  -7  191.15   11.70
  -3   4  -7  177.87   11.42
   3  -4   7  195.24   11.76
   3   4   8  149.12    9.40
   3   4   8  130.59    9.08
  -3  -4  -8  146.64    9.32
  -3   4  -8  144.10    9.37
  -3   4  -8  150.31    9.44
   3  -4   8  142.90    9.35
   3  -4   8  155.31    9.38
   3   4   9   11.65    2.03
  -3  -4  -9   15.23    1.70
  -3  -4  -9   11.70    1.76
  -3  -4  -9   12.92    2.08
  -3   4  -9    9.92    1.84
  -3   4  -9    9.66    1.94
   3  -4   9   11.28    2.28
   3  -4   9   10.52    2.15
   3   4  10   51.62    4.08
  -3  -4 -10   66.78    4.33
  -3  -4 -10   63.53    4.27
  -3   4 -10   62.21    4.36
  -3   4 -10   68.53    4.47
  -3   4 -10   53.93    3.96
   3  -4  10   62.30    4.49
   3   4  11   13.83    1.87
  -3  -4 -11   12.03    2.19
  -3   4 -11   13.85    1.64
   3  -4  11   14.58    2.45
  -3   4 -12  227.70   14.51
  -3  -4 -13   18.40    2.37
   3  -4  13    7.95    2.21
  -3  -4 -14  164.94   10.54
   3  -4  14  156.67   10.59
  -3  -4 -15    5.23    2.14
   3  -4  15    2.45    2.25
  -3  -4 -16   16.01    2.46
   3  -4  16   11.55    2.45
   3  -4  17    4.97    2.25
  -3  -4 -18   32.20    3.17
   3  -4  18   29.95    3.26
  -3  -4 -19    1.21    2.25
   3  -4  19    2.95    2.36
   3   5   0 1415.48   82.21
  -3  -5   0 1329.22   82.06
  -3  -5   0 1345.72   82.26
  -3  -5   0 1270.88   82.10
  -3   5   0 1407.59   83.62
   3  -5   0 1345.26   82.06
   3  -5   0 1218.37   81.96
   3   5   1    5.06    1.50
  -3  -5  -1    5.54    1.16
  -3  -5  -1    4.96    1.57
   3  -5   1    9.38    1.56
   3  -5   1    5.16    1.64
   3  -5   1    6.37    1.21
   3  -5   1    5.90    1.84
   3   5   2 1060.86   64.80
  -3  -5  -2 1056.43   64.74
   3  -5   2 1044.50   64.93
   3  -5   2 1026.05   64.93
   3  -5   2 1000.14   64.70
   3  -5   2 1005.55   64.96
   3   5   3    6.57    1.61
  -3  -5  -3    7.38    1.26
  -3  -5  -3    6.90    1.68
   3  -5   3    7.26    1.60
   3  -5   3    5.05    1.75
   3  -5   3    5.71    1.38
   3  -5   3    4.10    1.92
   3   5   4   26.75    2.43
  -3  -5  -4   27.48    2.26
  -3  -5  -4   22.98    2.47
   3  -5   4   27.02    2.51
   3  -5   4   29.46    2.52
   3  -5   4   26.09    2.28
   3  -5   4   30.18    2.76
  -3  -5  -5   34.50    2.78
  -3  -5  -5   42.27    2.85
  -3  -5  -5   34.86    3.03
   3  -5   5   36.01    2.88
   3  -5   5   34.05    3.21
   3   5   6  173.99   10.77
  -3  -5  -6  161.53   10.78
   3  -5   6  158.66   10.79
   3  -5   6  170.15   10.81
   3  -5   6  163.75   10.74
   3  -5   6  169.27   10.86
   3   5   7   -3.38    1.89
  -3  -5  -7    0.05    2.00
   3  -5   7   -0.97    1.62
   3  -5   7    1.66    1.81
   3  -5   7   -2.31    1.64
   3  -5   7    0.14    2.20
   3   5   8   64.93    4.61
  -3  -5  -8   69.02    4.48
  -3  -5  -8   60.01    4.47
  -3  -5  -8   61.36    4.56
   3  -5   8   61.52    4.56
   3  -5   8   64.83    4.67
   3  -5   8   59.07    4.57
   3  -5   8   64.40    4.60
  -3  -5  -9   13.06    1.78
  -3  -5  -9    8.61    1.73
  -3  -5  -9    9.77    2.03
  -3   5  -9   13.14    1.91
  -3   5  -9   11.09    1.87
   3  -5   9    8.61    2.18
  -3  -5 -10   65.51    4.69
   3  -5  10   63.45    4.74
   3  -5  12   23.12    2.77
  -3  -5 -13   -3.21    2.21
   3  -5  13    0.13    2.17
  -3  -5 -14   36.92    3.34
   3  -5  14   34.89    3.22
  -3  -5 -15   -2.16    2.12
   3  -5  15   -1.44    2.30
  -3  -5 -16   10.26    2.41
   3  -5  16    8.31    2.32
  -3  -5 -17    7.99    2.31
   3  -5  17    9.37    2.34
  -3  -5 -18    2.59    2.20
  -3  -5 -19    3.73    2.23
   3  -5  19    7.01    2.45
   3   6   0   97.28    6.03
  -3  -6   0   89.90    5.88
  -3  -6   0   94.12    6.03
  -3  -6   0   83.47    5.68
  -3   6   0   99.50    6.04
   3  -6   0   90.94    5.86
   3  -6   0   95.00    6.15
   3   6   1   16.08    2.12
  -3  -6  -1   19.90    1.77
  -3  -6  -1   19.65    2.15
   3  -6   1   20.02    2.14
   3  -6   1   16.01    2.12
   3  -6   1   17.99    1.72
   3  -6   1   19.43    2.34
   3   6   2  557.28   32.11
  -3  -6  -2  513.71   32.02
  -3  -6  -2  477.49   32.07
   3  -6   2  521.49   32.24
   3  -6   2  482.91   32.21
   3  -6   2  501.65   31.99
  -3  -6  -3    6.15    1.42
  -3  -6  -3    6.73    1.78
   3  -6   3    5.65    1.41
   3   6   4  883.17   55.10
  -3  -6  -4  913.26   55.11
   3  -6   4  822.36   55.03
   3  -6   4  907.72   55.23
   3   6   5   52.42    3.79
  -3  -6  -5   47.35    3.53
  -3  -6  -5   52.50    3.56
  -3  -6  -5   44.36    3.76
   3  -6   5   48.03    3.79
   3  -6   5   49.41    3.80
   3  -6   5   42.86    3.86
   3   6   6    2.85    1.98
  -3  -6  -6    0.35    1.94
   3  -6   6    2.61    2.12
   3  -6   6   -5.47    2.19
   3  -6   6   -5.28    1.85
   3  -6   6    1.26    2.17
   3   6   7   37.39    3.29
  -3  -6  -7   38.37    2.96
  -3  -6  -7   37.34    2.94
  -3  -6  -7   33.96    3.25
   3  -6   7   35.90    3.29
   3  -6   7   39.36    3.41
   3  -6   7   37.58    3.08
   3  -6   7   35.07    3.36
  -3  -6  -8   97.53    6.47
  -3  -6  -8  100.05    6.49
  -3  -6  -8   95.16    6.59
   3  -6   8   91.44    6.60
  -3  -6  -9   59.75    4.30
   3  -6   9   53.32    4.35
  -3  -6 -10  135.48    8.96
   3  -6  10  134.37    8.97
  -3  -6 -11   37.69    3.38
   3  -6  11   41.10    3.49
  -3  -6 -12  225.00   14.94
   3  -6  12  238.95   14.97
  -3  -6 -13    8.27    2.27
   3  -6  14   23.40    2.77
  -3  -6 -15   61.72    4.59
   3  -6  15   56.35    4.59
  -3  -6 -16   16.08    2.53
   3  -6  16   10.54    2.47
  -3  -6 -17   68.79    5.17
   3  -6  17   68.26    5.06
  -3  -6 -18   15.97    2.77
   3  -6  18   18.69    2.69
   3   7   0   16.00    2.04
   3   7   0    8.25    1.11
  -3  -7   0   12.67    1.55
  -3  -7   0   10.53    1.89
  -3  -7   0    9.49    0.84
  -3   7   0   10.42    1.79
   3  -7   0   13.77    1.47
   3  -7   0   11.48    2.13
   3   7   1   89.02    6.40
  -3  -7  -1   92.82    6.36
   3  -7   1  105.56    6.55
   3  -7   1   89.46    6.49
   3  -7   1   92.56    6.21
   3  -7   1   99.92    6.51
   3   7   2   21.13    2.33
  -3  -7  -2   17.86    2.27
   3  -7   2   22.05    2.42
   3  -7   2   17.95    2.48
   3  -7   2   18.29    2.55
   3   7   3   23.24    2.51
  -3  -7  -3   17.33    2.01
  -3  -7  -3   19.77    2.33
   3  -7   3   20.29    2.36
   3  -7   3   18.45    2.43
   3  -7   3   20.73    2.61
   3   7   4   37.95    3.09
  -3  -7  -4   22.66    2.49
  -3  -7  -4   37.76    2.95
   3  -7   4   39.58    3.21
   3  -7   4   38.85    3.16
   3  -7   4   36.67    2.83
   3  -7   4   36.23    3.21
   3   7   5   29.22    2.98
  -3  -7  -5   36.91    2.60
  -3  -7  -5   22.71    2.76
   3  -7   5   30.04    3.09
   3  -7   5   26.12    3.00
   3  -7   5   32.61    2.74
   3   7   6   43.84    3.70
  -3  -7  -6   43.99    3.36
  -3  -7  -6   45.18    3.37
   3  -7   6   44.69    3.75
   3  -7   6   44.43    3.78
   3  -7   6   40.54    3.86
  -3  -7  -7  194.31   12.58
  -3  -7  -7  205.17   12.51
   3  -7   7  179.27   12.55
  -3  -7  -8   47.88    3.86
   3  -7   8   47.65    3.86
  -3  -7  -9   22.86    2.53
   3  -7   9   19.71    2.63
  -3  -7 -10    0.79    2.03
   3  -7  10    1.47    2.21
  -3  -7 -11   28.88    2.85
   3  -7  11   24.05    2.91
  -3  -7 -12    2.67    2.16
   3  -7  12    2.62    2.29
  -3  -7 -13    3.63    2.28
   3  -7  13    4.01    2.33
  -3  -7 -14  149.85    9.62
   3  -7  14  139.32    9.57
  -3  -7 -15   20.10    2.81
   3  -7  16  128.71    8.68
  -3  -7 -17    2.36    2.47
   3  -7  17    2.36    2.19
   3   8   0    5.80    2.21
  -3  -8   0    9.98    1.36
  -3  -8   0    6.93    1.85
  -3   8   0    5.75    1.69
   3  -8   0    4.45    1.45
   3  -8   0    6.07    2.27
   3   8   1  121.56    7.42
  -3  -8  -1  106.26    7.25
   3  -8   1  106.99    7.51
   3  -8   1  109.38    7.47
   3  -8   1  104.01    7.12
   3  -8   1  106.20    7.36
   3   8   2  330.46   20.83
  -3  -8  -2  331.52   20.76
   3  -8   2  334.77   20.93
   3  -8   2  327.89   20.94
   3  -8   2  307.44   20.63
   3  -8   2  336.71   20.86
   3   8   3  174.34   11.02
  -3  -8  -3  166.79   10.85
  -3  -8  -3  164.46   10.93
   3  -8   3  175.26   11.10
   3  -8   3  175.96   11.10
   3  -8   3  157.41   10.81
   3  -8   3  172.10   11.03
  -3  -8  -4  345.89   21.33
  -3  -8  -4  325.41   21.34
   3  -8   4  334.43   21.41
  -3  -8  -5   63.48    4.33
  -3  -8  -5   56.48    4.41
   3  -8   5   58.51    4.66
  -3  -8  -6    4.00    2.08
   3  -8   6    5.44    2.35
  -3  -8  -7   18.23    2.34
  -3  -8  -8   11.47    2.18
   3  -8   9   21.51    2.70
  -3  -8 -10  129.75    8.14
   3  -8  10  111.89    8.07
  -3  -8 -11   69.99    5.01
   3  -8  11   64.24    5.02
  -3  -8 -12  228.28   14.03
   3  -8  12  205.21   14.01
  -3  -8 -13    3.94    2.34
   3  -8  13    5.03    2.37
  -3  -8 -14   18.34    2.72
   3  -8  14   18.86    2.62
  -3  -8 -15    0.77    2.31
   3  -8  15    1.28    2.22
  -3  -8 -16    2.22    2.36
   3  -8  16   -0.81    2.35
  -3  -9   0    2.99    1.52
   3  -9   0    4.73    2.55
  -3  -9  -1  223.64   13.92
  -3  -9  -1  210.58   13.94
   3  -9   1  214.64   14.04
  -3  -9  -2   30.04    2.91
   3  -9   2   33.93    3.22
  -3  -9  -3    0.47    1.94
   3  -9   3    1.76    2.34
  -3  -9  -4   21.89    2.68
   3  -9   4   26.55    3.06
  -3  -9  -5   -0.14    1.85
  -3  -9  -6   36.70    3.11
   3  -9   6   33.49    3.44
  -3  -9  -7    1.06    1.94
   3  -9   7    0.13    2.26
  -3  -9  -8   17.22    2.38
   3  -9   8   23.17    2.78
  -3  -9  -9   59.66    4.43
   3  -9   9   56.85    4.54
  -3  -9 -10   24.19    2.66
   3  -9  11   21.78    2.85
  -3  -9 -12   16.28    2.56
   3  -9  12   15.17    2.63
  -3  -9 -13    2.64    2.39
   3  -9  13    2.03    2.35
  -3  -9 -14   47.80    4.09
   3  -9  14   52.98    4.10
  -3  -9 -15   25.86    2.87
   3  -9  15   17.18    2.69
  -3 -10   0    0.36    2.15
   3 -10   0    0.50    2.42
   3 -10   1   73.79    5.49
  -3 -10  -2  301.75   19.30
   3 -10   3    2.61    2.44
  -3 -10  -4  188.88   12.29
   3 -10   4  189.73   12.38
  -3 -10  -5   50.01    3.99
   3 -10   5   49.11    4.14
  -3 -10  -6   15.32    2.28
   3 -10   6   13.22    2.65
  -3 -10  -7   45.43    3.73
   3 -10   7   45.37    3.91
  -3 -10  -8    1.94    2.01
   3 -10   8    2.07    2.37
  -3 -10  -9   14.94    2.22
   3 -10   9   11.15    2.56
  -3 -10 -10   20.28    2.66
   3 -10  10   30.90    3.03
  -3 -10 -11   10.80    2.27
   3 -10  11   16.32    2.63
  -3 -10 -12   63.16    4.78
  -3 -10 -14   15.84    2.57
   3 -10  14   16.66    2.56
  -3 -11   0  356.60   23.38
   3 -11   0  382.51   23.54
  -3 -11  -1   18.15    2.60
   3 -11   1   15.65    2.79
  -3 -11  -2  195.66   12.74
   3 -11   2  195.72   12.82
  -3 -11  -3   18.16    2.61
   3 -11   3   16.50    2.86
  -3 -11  -4   19.07    2.66
   3 -11   4   19.28    2.90
   3 -11   6   48.78    4.15
  -3 -11  -7    1.57    1.97
   3 -11   7    0.74    2.45
  -3 -11  -8   27.65    2.92
   3 -11   8   28.57    3.05
  -3 -11  -9    3.80    2.04
   3 -11   9    4.00    2.36
  -3 -11 -10   25.33    2.77
   3 -11  10   26.89    2.99
  -3 -11 -11   24.07    2.81
   3 -11  11   23.71    2.94
  -3 -11 -12    9.52    2.33
   3 -11  12    9.96    2.48
  -3 -11 -13   13.01    2.46
   3 -11  13   15.69    2.53
  -3 -12   0    3.55    2.18
   3 -12   0    5.47    2.65
  -3 -12  -1   -2.77    2.19
   3 -12   1    2.35    2.62
  -3 -12  -2   31.27    3.22
   3 -12   2   35.04    3.44
  -3 -12  -3    3.44    2.26
   3 -12   3    7.51    2.60
  -3 -12  -4  199.77   12.60
   3 -12   4  185.91   12.65
  -3 -12  -5    2.84    2.36
   3 -12   5    1.45    2.56
  -3 -12  -6  157.50   10.01
   3 -12   6  143.86   10.07
  -3 -12  -7   57.20    4.29
   3 -12   7   50.73    4.44
   3 -12   9   45.89    3.98
  -3 -12 -10   14.46    2.33
   3 -12  10   14.13    2.63
  -3 -12 -11    7.16    2.30
   3 -12  11   10.24    2.47
  -3 -12 -12   21.07    2.62
   3 -12  12   15.86    2.74
  -3 -13   0   56.06    4.41
   3 -13   0   58.28    4.68
  -3 -13  -2   23.48    2.81
   3 -13   2   24.16    3.13
  -3 -13  -3   24.78    2.94
   3 -13   3   27.08    3.22
  -3 -13  -4   52.79    4.28
   3 -13   4   54.50    4.52
  -3 -13  -5    0.90    2.18
   3 -13   5   -5.62    2.63
  -3 -13  -6   18.83    2.57
   3 -13   6   16.05    2.94
  -3 -13  -7    1.31    2.26
   3 -13   7   -1.40    2.45
  -3 -13  -8   14.92    2.52
   3 -13   8   11.66    2.67
  -3 -13  -9   20.93    2.72
   3 -13   9   20.40    2.86
  -3 -13 -10   33.47    3.22
   3 -13  10   33.91    3.39
  -3 -14   0    2.27    2.21
   3 -14   0    1.67    2.65
  -3 -14  -1   43.02    3.52
   3 -14   1   32.10    3.69
  -3 -14  -2    3.13    2.23
   3 -14   2    2.77    2.65
  -3 -14  -3   24.52    2.94
   3 -14   3   29.52    3.34
   3 -14   4   15.93    2.94
  -3 -14  -6    8.94    2.31
   3 -14   6    9.72    2.62
  -3 -14  -7   48.77    4.13
   3 -14   7   56.21    4.34
  -3 -14  -8    8.89    2.35
   3 -14   8    8.33    2.54
  -3 -15  -1   11.29    2.44
   3 -15   1    6.09    2.83
  -3 -15  -2    0.48    2.25
   3 -15   2  -10.49    2.76
  -3 -15  -3   26.79    2.90
   3 -15   3   22.04    3.21
  -3 -15  -4    4.07    2.38
   3 -15   4    0.97    2.68
  -3 -15  -5   16.76    2.65
   3 -15   5   13.25    2.87
  -3 -16   0    1.54    2.34
   3 -16   0    3.49    2.72
  -3 -16  -1   39.96    3.47
   3 -16   1   31.96    3.70
   3 -16   2   21.12    3.14
  -4   0   0   62.70    4.29
  -4   0  -1    1.14    1.29
   4   0   2   26.25    2.10
  -4   0  -2   21.90    1.61
  -4   0  -2   21.68    1.63
  -4   0  -2   19.96    2.02
   4   0   3   -1.04    0.92
   4   0   3    0.32    1.48
  -4   0  -3    0.61    1.44
   4   0   4  287.91   19.04
   4   0   4  283.48   18.72
   4   0   4  311.74   18.89
  -4   0  -4  304.78   18.76
  -4   0  -4  306.11   18.76
  -4   0  -4  291.29   18.82
   4   0   5    1.78    1.22
   4   0   5    0.79    1.35
  -4   0  -5   -1.37    1.08
  -4   0  -5    0.18    1.10
  -4   0  -5    1.41    1.58
   4   0   6   67.89    4.62
  -4   0  -6   66.71    4.36
  -4   0  -6   60.81    4.36
   4   0   7    2.07    1.47
   4   0   7   -3.67    1.63
   4   0   7    0.39    1.97
   4   0   8   43.53    3.52
   4   0   8   43.95    3.57
   4   0   8   48.12    3.67
  -4   0  -8   46.78    3.41
  -4   0  -8   50.70    3.44
  -4   0  -8   47.41    3.55
   4   0   9    2.12    2.07
  -4   0  -9   -0.21    1.37
  -4   0  -9    1.11    1.44
  -4   0  -9    2.24    1.82
   4   0  10    3.35    2.14
  -4   0 -10    5.62    1.94
   4   0  11    0.01    2.23
  -4   0 -12   13.81    2.32
   4   0  13    0.56    2.31
   4   0  14   26.53    3.04
  -4   0 -14   28.63    2.99
   4   0  15    0.85    2.32
  -4   0 -15    0.39    2.34
   4   0  16   37.95    3.40
  -4   0 -16   32.89    3.45
  -4  -1   0   14.31    1.75
  -4   1   0   16.72    1.71
   4   1   1   10.32    0.88
  -4  -1  -1   12.31    0.91
  -4  -1  -1   12.67    0.93
  -4  -1  -1   13.30    1.62
  -4   1  -1   15.80    1.52
   4  -1   1   11.56    0.91
   4  -1   1   11.84    0.91
   4  -1   1    9.62    0.91
   4  -1   1   13.58    1.70
  -4  -1  -2  250.93   14.73
  -4  -1  -2  254.36   14.74
  -4  -1  -2  235.20   14.88
  -4   1  -2  237.44   14.85
   4  -1   2  219.03   14.72
   4  -1   2  216.00   14.71
   4  -1   2  223.43   14.78
   4  -1   2  246.22   15.02
   4   1   3  175.55   11.26
   4   1   3  180.73   11.39
  -4  -1  -3  181.40   11.42
  -4   1  -3  178.45   11.34
   4  -1   3  175.22   11.27
   4  -1   3  176.75   11.27
   4  -1   3  183.86   11.47
   4   1   4  832.87   55.90
   4   1   4  919.34   56.08
  -4  -1  -4  911.65   56.00
  -4  -1  -4  942.93   56.02
  -4  -1  -4  867.98   56.03
   4  -1   4  906.56   56.19
   4   1   5   67.26    4.88
   4   1   5   78.29    4.99
  -4  -1  -5   75.54    4.85
  -4  -1  -5   73.99    4.85
  -4  -1  -5   79.76    5.05
  -4   1  -5   72.27    4.86
  -4   1  -5   75.41    4.89
  -4   1  -5   76.82    4.89
   4  -1   5   68.67    4.87
   4  -1   5   67.93    4.90
   4  -1   5   75.08    5.13
   4   1   6  121.16    8.30
  -4  -1  -6  137.00    8.25
  -4  -1  -6  134.06    8.25
  -4  -1  -6  118.13    8.32
  -4   1  -6  123.89    8.24
  -4   1  -6  127.24    8.26
  -4   1  -6  126.59    8.25
   4  -1   6  131.64    8.47
   4   1   7   27.23    2.43
   4   1   7   30.82    2.54
  -4  -1  -7   28.15    2.50
  -4   1  -7   24.68    2.24
  -4   1  -7   25.33    2.26
  -4   1  -7   25.50    2.33
   4  -1   7   25.38    2.39
   4  -1   7   24.07    2.47
   4   1   8  199.15   13.21
   4   1   8  211.83   13.23
  -4  -1  -8  218.91   13.22
  -4  -1  -8  212.18   13.22
  -4  -1  -8  193.37   13.21
  -4   1  -8  205.66   13.22
  -4   1  -8  211.12   13.23
  -4   1  -8  198.54   13.17
   4  -1   8  200.12   13.24
   4  -1   8  201.63   13.24
   4  -1   8  217.88   13.30
   4   1   9    8.91    2.10
  -4  -1  -9    7.98    1.59
  -4  -1  -9   11.06    1.69
  -4   1  -9   10.67    1.67
  -4   1  -9   10.13    1.73
  -4   1  -9   10.42    1.90
   4  -1   9    8.84    2.23
  -4  -1 -10   53.30    4.24
  -4   1 -10   57.02    4.16
   4  -1  10   62.38    4.39
   4   1  11   36.77    3.30
  -4  -1 -11   36.61    3.24
   4  -1  11   38.82    3.41
   4   1  12  231.96   14.68
  -4  -1 -12  234.66   14.70
  -4   1 -12  220.49   14.63
   4  -1  12  227.20   14.73
   4   1  13   28.67    3.06
  -4  -1 -13   32.19    3.11
  -4   1 -13   33.12    2.97
   4  -1  13   30.04    3.22
   4   1  14   84.91    5.97
  -4  -1 -14   83.06    6.04
  -4   1 -14   85.86    5.94
  -4   1 -15   36.51    3.38
   4  -1  15   38.73    3.38
  -4  -1 -16   14.78    2.72
   4  -1  16   17.70    2.70
  -4  -1 -17    1.23    2.48
   4  -1  17   -1.57    2.38
  -4  -2   0  480.47   29.02
  -4  -2   0  484.80   29.02
  -4  -2   0  484.64   29.29
  -4  -2   0  483.86   29.99
   4  -2   0  442.89   29.05
   4  -2   0  427.42   29.04
  -4  -2  -1   15.04    1.24
  -4  -2  -1   16.50    1.22
  -4  -2  -1   13.07    1.90
   4  -2   1   17.26    1.30
   4  -2   1   17.08    1.30
   4  -2   1   12.53    1.23
   4  -2   1   16.92    1.96
   4   2   2  161.25   10.06
   4   2   2  165.09   10.24
  -4  -2  -2  168.12   10.07
  -4  -2  -2  163.09   10.06
   4  -2   2  155.31   10.07
   4  -2   2  154.84   10.07
   4  -2   2  148.46   10.05
   4  -2   2  156.36   10.31
   4   2   3    3.50    1.14
   4   2   3    3.95    1.38
  -4  -2  -3    2.83    0.89
  -4  -2  -3    4.61    0.93
  -4  -2  -3    3.03    1.52
   4  -2   3    3.99    1.13
   4  -2   3    3.45    1.15
   4  -2   3    3.51    1.02
   4  -2   3    3.49    1.92
   4   2   4   40.02    2.85
  -4  -2  -4   38.90    3.10
  -4   2  -4   39.89    2.82
  -4   2  -4   39.21    2.83
   4  -2   4   34.96    2.81
   4  -2   4   39.90    2.85
   4  -2   4   41.84    3.32
   4   2   5  315.15   19.88
   4   2   5  325.16   19.91
  -4  -2  -5  327.83   19.89
  -4  -2  -5  331.58   19.89
  -4  -2  -5  313.25   19.98
  -4   2  -5  309.91   20.01
  -4   2  -5  321.70   20.04
  -4   2  -5  295.48   19.85
   4  -2   5  303.87   19.89
   4  -2   5  298.70   19.88
   4  -2   5  333.00   20.07
   4   2   6  179.75   11.23
   4   2   6  182.17   11.23
  -4  -2  -6  178.22   11.22
  -4  -2  -6  184.60   11.22
  -4  -2  -6  172.21   11.34
  -4   2  -6  178.97   11.29
  -4   2  -6  162.67   11.26
  -4   2  -6  166.41   11.16
   4  -2   6  165.78   11.25
   4  -2   6  182.11   11.27
   4  -2   6  182.95   11.43
   4   2   7    3.13    1.39
   4   2   7    1.87    1.68
  -4  -2  -7    3.52    1.26
  -4  -2  -7    2.87    1.26
  -4  -2  -7    2.08    1.82
  -4   2  -7    1.92    1.35
  -4   2  -7    2.41    1.38
  -4   2  -7    4.79    1.29
   4  -2   7    3.94    1.59
   4  -2   7    2.60    1.78
   4  -2   7    5.43    2.26
   4   2   8  165.08   10.72
  -4  -2  -8  179.69   10.75
  -4  -2  -8  167.86   10.72
  -4  -2  -8  163.22   10.80
  -4   2  -8  171.07   10.79
  -4   2  -8  170.88   10.80
  -4   2  -8  163.99   10.66
   4  -2   8  161.35   10.79
   4  -2   8  150.14   10.80
   4  -2   8  173.26   10.89
   4   2   9   23.72    2.55
  -4  -2  -9   28.61    2.31
  -4  -2  -9   22.97    2.35
  -4  -2  -9   24.53    2.62
  -4   2  -9   24.24    2.36
  -4   2  -9   28.35    2.43
   4  -2   9   23.41    2.80
   4   2  10   34.43    3.03
  -4  -2 -10   35.55    3.10
  -4   2 -10   34.97    2.85
   4   2  11   20.32    2.51
  -4   2 -11   23.61    2.32
   4  -2  11   23.31    2.81
   4   2  12   10.03    2.19
  -4  -2 -12    8.89    2.30
  -4   2 -12    8.35    1.87
   4  -2  12    8.80    2.44
  -4  -2 -13   55.14    4.40
  -4   2 -13   54.18    4.16
   4  -2  13   58.70    4.29
  -4  -2 -14   83.11    6.11
   4  -2  14   85.77    6.01
  -4  -2 -15    2.13    2.37
   4  -2  15    0.36    2.27
  -4  -2 -16   15.02    2.87
  -4  -2 -17   40.72    3.73
   4  -2  17   39.02    3.66
  -4  -2 -18   -2.05    2.52
   4  -2  18    0.19    2.42
  -4  -2 -19   16.55    2.91
   4   3   0    7.68    1.04
  -4  -3   0    4.42    0.83
  -4  -3   0    5.48    0.87
  -4  -3   0    6.56    1.54
   4  -3   0    6.54    1.11
   4  -3   0    5.53    1.14
   4  -3   0    4.30    0.81
   4  -3   0    6.99    1.45
   4   3   1    4.98    1.08
  -4  -3  -1    3.74    1.68
   4  -3   1    3.84    1.09
   4  -3   1    5.79    1.13
   4  -3   1    5.36    0.90
   4  -3   1    3.74    1.32
   4  -3   1    3.51    1.89
   4   3   2  705.27   42.42
   4   3   2  660.70   42.58
  -4  -3  -2  695.35   42.41
  -4  -3  -2  697.49   42.37
  -4  -3  -2  662.07   42.55
   4  -3   2  672.75   42.44
   4  -3   2  658.03   42.42
   4  -3   2  644.27   42.38
   4  -3   2  678.67   42.78
   4   3   3   28.13    2.04
   4   3   3   24.18    2.03
  -4  -3  -3   25.97    1.87
  -4  -3  -3   24.81    1.90
  -4  -3  -3   22.08    2.30
  -4   3  -3   23.39    1.84
   4  -3   3   23.72    1.96
   4  -3   3   23.62    2.02
   4  -3   3   24.27    1.96
   4   3   4 1434.99   84.43
   4   3   4 1337.17   84.37
  -4  -3  -4 1409.65   84.38
  -4   3  -4 1183.91   84.53
   4  -3   4 1371.09   84.38
   4  -3   4 1313.96   84.33
   4  -3   4 1313.36   84.75
   4  -3   4 1428.03   84.73
   4   3   5   19.07    1.42
  -4  -3  -5   10.61    1.42
  -4  -3  -5   13.68    1.48
  -4  -3  -5   10.54    2.09
   4  -3   5    9.73    1.66
   4  -3   5   11.91    1.68
   4  -3   5   11.39    2.33
   4   3   6  256.44   15.45
  -4  -3  -6  235.14   15.50
  -4   3  -6  226.15   15.28
   4  -3   6  252.47   15.46
   4  -3   6  245.10   15.45
   4  -3   6  263.39   15.60
   4   3   7   94.12    6.46
   4   3   7   89.38    6.33
  -4  -3  -7  102.08    6.39
  -4  -3  -7  107.12    6.39
  -4  -3  -7   95.14    6.55
  -4   3  -7   93.98    6.46
  -4   3  -7  100.61    6.50
  -4   3  -7   93.04    6.22
   4  -3   7   88.76    6.46
   4  -3   7   98.35    6.49
   4  -3   7  106.14    6.72
   4   3   8   66.80    4.64
   4   3   8   58.86    4.47
  -4  -3  -8   63.24    4.52
  -4  -3  -8   71.90    4.55
  -4  -3  -8   64.77    4.73
  -4   3  -8   64.48    4.60
  -4   3  -8   68.72    4.63
  -4   3  -8   67.68    4.34
   4  -3   8   64.55    4.70
   4  -3   8   64.64    4.73
   4  -3   8   58.27    4.87
   4   3   9   22.85    2.42
  -4  -3  -9   27.97    2.75
  -4   3  -9   27.76    2.15
   4  -3   9   30.09    2.93
   4   3  10  139.90    9.52
  -4  -3 -10  146.17    9.71
  -4   3 -10  148.52    9.46
   4  -3  10  159.19    9.77
  -4  -3 -11    1.37    2.06
   4  -3  11   -4.58    2.35
  -4  -3 -12  309.23   19.76
   4  -3  13    2.81    2.11
  -4  -3 -14  242.02   15.60
   4  -3  14  241.44   15.57
  -4  -3 -15  106.80    7.03
   4  -3  15   94.47    6.95
  -4  -3 -16    4.16    2.50
   4  -3  16    5.07    2.31
  -4  -3 -17    3.78    2.49
  -4  -3 -18   53.12    4.22
   4  -3  18   45.56    4.12
  -4  -3 -19    2.33    2.61
   4  -3  19    4.81    2.46
   4   4   0  624.13   35.79
  -4  -4   0  563.38   35.61
  -4  -4   0  610.95   35.81
  -4  -4   0  569.27   36.03
   4  -4   0  514.21   35.57
   4  -4   0  571.51   35.66
   4  -4   0  597.71   36.84
   4   4   1   43.19    2.84
  -4  -4  -1   38.81    2.69
  -4  -4  -1   39.68    3.11
   4  -4   1   36.62    2.81
   4  -4   1   39.55    2.83
   4  -4   1   35.26    2.64
   4  -4   1   37.15    3.22
   4   4   2  524.03   29.11
  -4  -4  -2  502.31   29.34
  -4  -4  -2  520.63   29.10
  -4  -4  -2  488.56   29.25
   4  -4   2  498.71   29.11
   4  -4   2  492.08   29.11
   4  -4   2  466.21   29.03
   4  -4   2  357.93   28.93
   4  -4   2  493.19   29.37
   4   4   3   24.45    2.05
   4   4   3   22.61    1.61
   4   4   3   14.87    1.57
  -4  -4  -3   25.94    2.26
   4  -4   3   23.03    2.06
   4  -4   3   24.83    2.07
   4  -4   3   26.31    1.88
   4  -4   3   23.55    2.59
   4   4   4   24.33    2.18
  -4  -4  -4   37.20    2.45
  -4  -4  -4   40.95    2.50
  -4  -4  -4   31.37    2.81
   4  -4   4   35.49    2.54
   4  -4   4   37.71    2.64
   4  -4   4   44.52    3.15
   4   4   5    2.84    1.60
   4   4   5    0.11    0.90
  -4  -4  -5    0.99    1.81
   4  -4   5    0.67    1.48
   4  -4   5    1.46    1.55
   4  -4   5    0.20    1.26
   4   4   6  470.84   26.32
   4   4   6  332.81   26.04
  -4  -4  -6  496.62   26.32
  -4  -4  -6  497.40   26.33
   4  -4   6  436.05   26.31
   4  -4   6  432.64   26.30
   4  -4   6  456.54   26.44
   4   4   7    6.59    1.81
  -4  -4  -7    8.95    1.41
  -4  -4  -7   11.62    1.50
  -4  -4  -7    7.92    2.04
  -4   4  -7    4.85    0.74
   4  -4   7    6.80    1.83
   4  -4   7    5.66    1.94
   4  -4   7    7.91    2.37
  -4  -4  -8  131.59    8.85
  -4  -4  -8  146.31    8.89
  -4  -4  -8  119.18    8.93
  -4   4  -8  142.42    9.17
  -4   4  -8  142.08    9.15
   4  -4   8  136.07    9.08
  -4  -4  -9    5.99    2.20
   4  -4   9    8.91    2.38
  -4  -4 -10  164.44   10.89
   4  -4  10  169.97   10.96
  -4  -4 -11    3.26    2.25
   4  -4  11    3.37    2.39
  -4  -4 -12   22.43    2.88
   4  -4  12   20.02    2.84
  -4  -4 -13   41.44    3.80
   4  -4  13   43.87    3.75
   4  -4  14   16.50    2.49
  -4  -4 -15   -5.20    2.60
  -4  -4 -16   14.46    2.68
   4  -4  16   14.48    2.60
  -4  -4 -17    7.84    2.52
   4  -4  17    6.69    2.35
  -4  -4 -18   10.37    2.71
   4  -4  18   12.47    2.64
  -4  -5   0   17.29    2.24
  -4  -5   0   21.00    1.46
   4  -5   0   17.89    1.91
   4  -5   0   19.38    2.06
   4  -5   0   17.61    1.57
   4  -5   0   15.02    1.49
   4  -5   0   24.95    2.42
   4   5   1   31.57    2.57
   4   5   1   36.50    2.45
  -4  -5  -1   43.74    3.10
   4  -5   1   40.92    2.64
   4  -5   1   44.66    3.27
  -4  -5  -2  515.11   31.10
  -4  -5  -2  498.10   31.26
   4  -5   2  487.61   31.18
   4  -5   2  478.61   31.18
   4  -5   2  483.58   31.34
   4   5   3   10.62    1.75
  -4  -5  -3    9.78    1.36
  -4  -5  -3   10.93    1.43
  -4  -5  -3    8.81    1.91
   4  -5   3   10.24    1.73
   4  -5   3   10.35    1.80
   4  -5   3    9.07    1.39
   4  -5   3    8.59    2.21
   4   5   4  265.42   16.59
  -4  -5  -4  269.04   16.62
  -4  -5  -4  273.73   16.55
  -4  -5  -4  268.83   16.65
   4  -5   4  257.03   16.60
   4  -5   4  250.39   16.61
   4  -5   4  247.47   16.50
   4  -5   4  253.66   16.73
  -4  -5  -5   10.81    1.48
  -4  -5  -5   12.03    1.53
  -4  -5  -5    8.43    2.00
   4  -5   5    7.68    1.95
   4  -5   5   12.02    1.98
   4  -5   5   11.38    2.33
   4   5   6   40.76    3.21
  -4  -5  -6   41.95    2.92
  -4  -5  -6   37.06    2.96
  -4  -5  -6   37.21    3.27
   4  -5   6   36.33    3.10
   4  -5   6   34.87    3.18
   4  -5   6   38.62    3.47
  -4  -5  -7   22.26    2.04
  -4  -5  -7   20.75    2.10
  -4  -5  -7   19.03    2.49
   4  -5   8   18.23    2.74
  -4  -5 -10  115.41    7.48
   4  -5  10  104.75    7.50
  -4  -5 -11    0.19    2.19
   4  -5  11    0.27    2.37
  -4  -5 -12  236.53   15.06
   4  -5  12  230.26   15.08
  -4  -5 -13    4.81    2.36
   4  -5  13    3.08    2.37
  -4  -5 -14  139.16    9.25
   4  -5  14  136.48    9.16
  -4  -5 -15   14.89    2.77
  -4  -5 -16    0.33    2.41
   4  -5  16   -2.00    2.36
  -4  -5 -17   12.54    2.80
   4  -5  17   15.23    2.53
  -4  -5 -18   35.81    3.62
   4  -5  18   36.35    3.38
   4   6   0   53.93    3.62
   4  -6   0   48.90    3.62
   4  -6   0   51.31    3.69
   4  -6   0   43.07    3.26
   4  -6   0   49.92    3.91
   4   6   1   53.94    3.98
  -4  -6  -1   55.63    4.04
   4  -6   1   55.15    4.00
   4  -6   1   54.19    4.03
   4  -6   1   54.24    3.73
   4  -6   1   58.01    4.24
   4   6   2  229.74   14.36
  -4  -6  -2  228.91   14.28
  -4  -6  -2  216.62   14.39
   4  -6   2  232.06   14.39
   4  -6   2  229.04   14.40
   4  -6   2  218.96   14.23
   4  -6   2  215.17   14.49
   4   6   3  158.85   10.07
  -4  -6  -3  161.88    9.98
  -4  -6  -3  141.53   10.07
   4  -6   3  155.31   10.11
   4  -6   3  158.01   10.10
   4  -6   3  151.18   10.22
   4   6   4    0.93    1.87
  -4  -6  -4    1.54    1.29
  -4  -6  -4    1.38    1.35
  -4  -6  -4   -4.93    2.05
   4  -6   4    1.54    1.94
   4  -6   4    2.95    1.91
   4  -6   4    3.25    2.35
   4   6   5   12.25    2.39
  -4  -6  -5   16.38    1.80
  -4  -6  -5   18.12    1.78
  -4  -6  -5   12.92    2.30
   4  -6   5   16.60    2.57
  -4  -6  -6  154.60    9.91
  -4  -6  -6  160.30    9.91
  -4  -6  -6  145.47   10.02
   4  -6   6  147.06   10.10
  -4  -6  -7    0.34    2.00
   4  -6   7    0.31    2.30
   4  -6   8   49.37    4.10
  -4  -6  -9    6.39    2.07
  -4  -6 -11    9.66    2.26
   4  -6  11    7.25    2.37
  -4  -6 -12    3.50    2.25
   4  -6  12    6.53    2.31
  -4  -6 -13    0.52    2.48
   4  -6  13    3.93    2.36
  -4  -6 -14   44.74    3.70
   4  -6  14   37.30    3.49
  -4  -6 -15    9.22    2.57
   4  -6  15   16.36    2.41
  -4  -6 -16   97.55    6.62
   4  -6  16   88.65    6.51
   4  -6  17   -2.34    2.32
   4   7   0   18.33    2.36
  -4  -7   0   18.32    1.81
  -4  -7   0   14.36    2.28
   4  -7   0   20.92    2.34
   4  -7   0   22.11    2.41
   4  -7   0   20.28    2.55
   4   7   1   24.80    2.42
  -4  -7  -1   16.17    1.89
  -4  -7  -1   19.37    2.42
   4  -7   1   19.10    2.33
   4  -7   1   19.97    2.39
   4   7   2   39.89    3.34
  -4  -7  -2   37.41    2.97
   4  -7   2   40.27    3.37
   4  -7   2   40.45    3.42
  -4  -7  -3    4.96    1.48
   4  -7   3    2.44    2.28
  -4  -7  -4   46.53    3.36
  -4  -7  -4   41.78    3.59
   4  -7   4   45.51    3.91
  -4  -7  -5   39.79    3.37
   4  -7   5   38.57    3.56
  -4  -7  -7  123.29    8.26
   4  -7   7  125.30    8.39
  -4  -7  -8   42.05    3.58
   4  -7   8   46.45    3.83
  -4  -7  -9   60.47    4.53
  -4  -7 -10   -2.77    2.06
   4  -7  10    0.17    2.26
  -4  -7 -11    1.34    2.04
   4  -7  12   17.80    2.73
  -4  -7 -13   85.51    5.98
   4  -7  13   83.94    6.06
  -4  -7 -14   19.13    2.78
   4  -7  14   23.12    2.87
  -4  -7 -15   39.56    3.58
   4  -7  15   37.60    3.42
  -4  -7 -16    2.34    2.47
   4  -7  16    4.14    2.34
  -4  -8   0  119.97    7.94
  -4  -8   0  120.28    8.12
   4  -8   0  125.65    8.26
  -4  -8  -1    5.87    2.04
   4  -8   1    6.49    2.46
  -4  -8  -2  180.82   12.02
   4  -8   2  191.21   12.16
  -4  -8  -4   29.75    2.94
   4  -8   5   29.94    3.28
  -4  -8  -6   81.18    5.66
   4  -8   6   77.68    5.79
  -4  -8  -7    0.02    1.90
   4  -8   7   -0.79    2.33
  -4  -8  -8   48.62    4.00
   4  -8   8   55.53    4.25
  -4  -8  -9    4.01    1.97
   4  -8   9    7.38    2.42
  -4  -8 -10   11.99    2.18
   4  -8  10    9.79    2.45
  -4  -8 -11   10.33    2.21
   4  -8  11    9.22    2.50
  -4  -8 -12   90.51    6.35
   4  -8  12   93.62    6.50
  -4  -8 -13    1.45    2.07
   4  -8  14  109.53    7.54
  -4  -8 -15    3.57    2.18
   4  -8  15    4.34    2.30
  -4  -9   0   29.15    2.95
   4  -9   0   30.86    3.17
  -4  -9  -1    4.99    2.18
   4  -9   1    4.86    2.34
  -4  -9  -2   22.49    2.63
   4  -9   2   25.85    3.00
  -4  -9  -3   36.28    3.31
   4  -9   3   42.54    3.65
  -4  -9  -4  140.12    9.35
   4  -9   4  141.76    9.45
  -4  -9  -5    1.90    2.14
   4  -9   5    0.09    2.43
  -4  -9  -6    3.21    2.16
   4  -9   7   45.76    3.99
  -4  -9  -8  103.54    7.04
   4  -9   8  101.39    7.14
  -4  -9  -9   38.57    3.39
   4  -9   9   41.56    3.67
  -4  -9 -10   10.20    2.26
   4  -9  10   12.35    2.50
  -4  -9 -11    3.66    2.10
   4  -9  11    4.09    2.38
  -4  -9 -12   25.25    2.93
   4  -9  12   31.47    3.15
  -4  -9 -13    0.28    2.07
   4  -9  13    0.90    2.45
  -4  -9 -14   26.00    2.76
   4  -9  14   24.43    3.06
  -4 -10   0  270.48   17.25
   4 -10   0  267.50   17.34
  -4 -10  -1   59.88    4.46
   4 -10   1   58.18    4.65
   4 -10   2  133.51    9.00
  -4 -10  -3   11.02    2.16
   4 -10   3    7.99    2.65
  -4 -10  -4    3.12    2.13
   4 -10   4    0.63    2.57
  -4 -10  -5    4.91    2.18
   4 -10   5    3.48    2.56
  -4 -10  -6   29.12    3.11
   4 -10   6   33.70    3.33
  -4 -10  -7   11.88    2.28
   4 -10   7    8.41    2.62
  -4 -10  -8   48.54    3.92
   4 -10   8   44.94    4.05
   4 -10  10   39.23    3.60
  -4 -10 -11    1.36    2.09
   4 -10  11   -4.97    2.45
  -4 -10 -12   15.16    2.42
   4 -10  12   19.08    2.73
  -4 -10 -13    3.14    2.07
   4 -10  13    3.12    2.42
  -4 -11   0   16.75    2.46
   4 -11   0   14.42    2.81
   4 -11   2  100.84    7.11
  -4 -11  -3   72.90    5.39
   4 -11   3   77.79    5.70
  -4 -11  -4  175.94   11.68
   4 -11   4  181.98   11.78
  -4 -11  -5   10.26    2.32
   4 -11   5   11.41    2.73
  -4 -11  -6   27.15    3.03
   4 -11   6   27.71    3.26
  -4 -11  -7   91.95    6.30
   4 -11   7   86.64    6.40
  -4 -11  -8   13.76    2.49
   4 -11   8    9.49    2.65
  -4 -11  -9   33.41    3.24
   4 -11   9   30.28    3.28
  -4 -11 -10   43.77    3.56
   4 -11  10   36.26    3.66
  -4 -11 -11   11.12    2.35
  -4 -12   0   55.70    4.70
   4 -12   0   74.12    5.05
  -4 -12  -1    1.15    2.12
   4 -12   1    1.80    2.75
  -4 -12  -2    3.36    2.37
   4 -12   2    2.64    2.73
  -4 -12  -3   25.53    2.92
   4 -12   3   24.35    3.21
   4 -12   5   22.65    3.08
  -4 -12  -6  126.60    8.47
   4 -12   6  124.59    8.57
  -4 -12  -7    1.34    2.28
   4 -12   7    3.03    2.50
  -4 -12  -8   18.72    2.64
   4 -12   8   14.67    2.69
  -4 -12  -9    1.51    2.34
   4 -12   9    0.81    2.38
  -4 -12 -10   -0.50    2.33
   4 -12  10    3.85    2.44
  -4 -13   0    1.86    2.14
   4 -13   0    1.67    2.85
  -4 -13  -1   63.49    4.92
   4 -13   1   68.12    5.17
  -4 -13  -2  110.81    7.42
   4 -13   2  104.90    7.52
  -4 -13  -3   -1.15    2.16
   4 -13   3    1.43    2.55
  -4 -13  -4   81.88    5.78
   4 -13   4   78.09    5.91
  -4 -13  -5   15.22    2.60
   4 -13   5   20.34    3.00
  -4 -13  -6   10.28    2.44
   4 -13   6    6.46    2.64
  -4 -14   0    8.86    2.43
   4 -14   0    6.90    2.79
  -4 -14  -2   51.87    4.22
   4 -14   2   53.87    4.57
  -4 -14  -3    9.91    2.35
   4 -14   3    3.65    2.68
  -4 -14  -4    1.49    2.17
   4 -14   4    0.62    2.56
  -4 -14  -5   13.35    2.42
   4 -14   5   12.11    2.80
  -4 -15   0   26.69    2.90
   4 -15   0   20.75    3.18
  -4 -15  -1    1.89    2.25
   4 -15   1    2.60    2.64
   4 -15   2   10.92    2.81
  -5   0   0  135.05    8.83
  -5   0  -1   -2.43    1.67
   5   0   2    3.14    1.68
   5   0   3   -0.57    0.74
   5   0   3    1.14    1.77
   5   0   4    4.12    1.02
   5   0   4    7.70    1.89
  -5   0  -4    6.46    1.16
  -5   0  -4    6.22    1.22
  -5   0  -4   10.63    1.87
   5   0   5    1.85    1.23
   5   0   5   -0.37    1.85
  -5   0  -5   -4.18    1.85
   5   0   6  139.48    9.17
   5   0   6  150.83    9.38
  -5   0  -6  141.17    9.17
  -5   0  -6  138.19    9.17
  -5   0  -6  150.10    9.34
   5   0   7    2.02    2.33
  -5   0  -7    0.29    1.21
  -5   0  -7    2.13    1.32
  -5   0  -7   -1.96    1.82
   5   0   8  145.40    9.82
  -5   0  -8  152.74    9.77
  -5   0  -9   -4.21    2.07
   5   0  10   91.53    6.56
  -5   0 -10   98.19    6.50
   5   0  11    2.51    2.29
  -5   0 -11   -3.50    2.09
   5   0  12    2.01    2.39
  -5   0 -12    1.51    2.14
  -5   0 -13   -2.71    2.19
  -5  -1   0  303.54   19.32
   5   1   1   53.49    3.72
  -5  -1  -1   45.89    3.64
  -5   1  -1   48.64    3.64
   5  -1   1   49.86    3.73
   5   1   2 1386.14   84.82
  -5  -1  -2 1312.16   84.32
  -5   1  -2 1323.65   84.44
   5  -1   2 1376.08   84.84
   5   1   3    5.53    0.85
   5   1   3    5.81    1.74
  -5  -1  -3    6.34    0.96
  -5  -1  -3    5.89    1.03
  -5  -1  -3    5.26    1.76
  -5   1  -3    2.33    1.58
   5  -1   3    2.93    0.92
   5  -1   3    4.87    0.95
   5  -1   3    5.61    1.96
   5   1   4    2.81    1.69
  -5  -1  -4    5.00    1.12
  -5  -1  -4    5.43    1.21
  -5  -1  -4    5.96    1.91
  -5   1  -4    5.63    1.57
   5   1   5    0.78    1.20
   5   1   5   -0.45    1.70
  -5   1  -5    0.58    1.61
   5  -1   5    0.65    1.23
   5  -1   5   -1.99    1.35
   5  -1   5    1.33    1.98
   5   1   6  305.68   19.84
   5   1   6  323.97   19.97
  -5  -1  -6  329.09   19.87
  -5  -1  -6  339.58   19.88
  -5  -1  -6  310.29   19.98
  -5   1  -6  304.02   19.92
  -5   1  -6  308.32   19.94
  -5   1  -6  319.23   19.93
   5  -1   6  289.48   19.96
   5  -1   6  300.27   19.85
   5  -1   6  333.48   20.06
  -5  -1  -7    1.34    1.25
  -5  -1  -7    0.07    1.28
  -5  -1  -7    1.69    1.90
  -5   1  -7   -1.67    1.23
  -5   1  -7    0.90    1.27
   5  -1   7    2.12    2.46
   5   1   8   49.86    3.99
  -5  -1  -8   55.09    4.05
  -5   1  -8   51.36    3.82
   5  -1   8   50.75    4.17
   5   1   9   21.79    2.57
  -5  -1  -9   16.87    2.60
  -5   1  -9   21.07    2.39
   5  -1   9   23.52    2.74
   5   1  10  169.87   11.16
  -5  -1 -10  169.19   11.19
  -5   1 -10  170.60   11.11
   5  -1  10  177.20   11.25
   5   1  11    2.56    2.29
  -5  -1 -11    4.27    2.21
  -5   1 -11    5.52    2.03
  -5  -1 -12    2.76    2.25
  -5  -1 -13    5.48    2.32
   5  -1  13    3.57    2.17
  -5  -1 -14   79.83    5.53
   5  -1  14   71.02    5.49
  -5  -1 -15    1.49    2.38
  -5  -2   0   29.61    2.76
   5  -2   0   33.78    2.83
   5   2   1    1.90    1.56
  -5  -2  -1    0.39    1.74
   5  -2   1    1.78    0.55
   5  -2   1    1.23    0.56
   5  -2   1    0.81    0.51
   5  -2   1    2.97    1.91
   5   2   2   16.52    1.46
   5   2   2   25.71    2.18
  -5  -2  -2   20.22    1.51
  -5  -2  -2   28.16    1.54
  -5  -2  -2   26.60    2.29
  -5   2  -2   25.40    1.91
   5  -2   2   18.38    1.51
   5  -2   2   18.23    1.52
   5  -2   2   16.57    1.48
   5  -2   2   26.08    2.49
   5   2   3   58.40    3.70
   5   2   3   55.33    3.99
  -5  -2  -3   59.25    3.69
  -5  -2  -3   59.69    3.70
  -5  -2  -3   65.67    4.17
  -5   2  -3   59.81    3.86
   5  -2   3   51.02    3.71
   5  -2   3   55.31    3.73
   5  -2   3   45.38    3.66
   5  -2   3   63.16    4.29
   5   2   4   82.67    5.27
  -5  -2  -4   88.12    5.25
  -5  -2  -4   82.98    5.25
  -5  -2  -4   78.19    5.62
  -5   2  -4   74.27    5.30
   5  -2   4   74.03    5.26
   5  -2   4   78.01    5.28
   5  -2   4   84.63    5.74
   5   2   5    1.04    1.29
   5   2   5    1.63    1.58
  -5  -2  -5    0.99    1.09
  -5  -2  -5    0.57    1.15
  -5  -2  -5   -4.79    2.05
   5  -2   5    0.38    1.32
   5  -2   5    0.17    1.39
   5  -2   5    1.57    2.25
   5   2   6   10.95    1.82
   5   2   6   16.02    1.91
  -5  -2  -6   17.57    1.54
  -5  -2  -6   18.70    1.61
  -5  -2  -6   19.79    2.22
  -5   2  -6   11.87    1.58
  -5   2  -6   17.18    1.62
  -5   2  -6   14.01    1.66
   5  -2   6   12.55    1.85
   5  -2   6   11.05    1.88
   5   2   7    3.12    1.79
  -5  -2  -7    1.89    1.11
  -5  -2  -7    0.65    1.16
  -5   2  -7   -1.43    1.22
  -5   2  -7   -0.70    1.25
  -5   2  -7   -0.12    1.43
   5  -2   7   -2.17    2.50
  -5  -2  -8   59.51    4.42
  -5   2  -8   56.68    4.07
   5  -2   8   55.79    4.56
   5   2   9    2.91    2.05
  -5  -2  -9    0.67    2.12
  -5   2  -9   -3.70    1.58
   5  -2   9    3.92    2.38
  -5  -2 -10   33.89    3.24
   5  -2  10   34.72    3.35
   5  -2  11   23.78    3.00
  -5  -2 -12   32.50    3.24
   5  -2  12   35.42    3.38
  -5  -2 -14   12.52    2.59
   5  -2  14   16.46    2.65
  -5  -2 -15    4.29    2.41
   5  -2  15    6.59    2.39
  -5  -2 -16    5.39    2.45
   5  -2  16    6.55    2.39
  -5  -3   0  155.01    9.73
  -5  -3   0  160.80    9.72
  -5  -3   0  153.42    9.73
   5  -3   0  156.14    9.75
   5  -3   0  152.90    9.74
   5  -3   0  137.80    9.72
   5  -3   0  186.27   10.12
   5  -3   0  181.19   10.50
   5   3   1    1.38    0.77
   5   3   1    2.12    1.59
  -5  -3  -1    2.29    0.75
  -5  -3  -1    1.13    0.78
  -5  -3  -1    0.66    1.77
   5  -3   1    0.26    0.91
   5  -3   1    1.32    0.87
   5  -3   1    0.86    0.70
   5  -3   1    1.31    1.58
   5  -3   1    0.65    2.11
   5   3   2    1.18    0.98
   5   3   2    0.48    1.53
  -5  -3  -2    0.44    0.90
  -5  -3  -2    1.10    0.95
  -5  -3  -2    1.40    1.84
   5  -3   2    0.76    1.08
   5  -3   2    1.91    1.09
   5  -3   2    0.14    2.13
   5   3   3   -0.69    1.44
  -5  -3  -3   -0.87    1.00
  -5  -3  -3    0.45    1.06
  -5  -3  -3   -2.93    1.94
   5  -3   3    2.02    1.20
   5  -3   3    0.42    1.21
   5  -3   3    2.06    2.33
   5   3   4  153.58    8.94
   5   3   4  137.29    8.95
  -5  -3  -4  141.56    9.17
   5  -3   4  134.21    8.92
   5  -3   4  126.74    8.93
   5  -3   4  148.97    9.32
   5   3   5    1.92    1.47
   5   3   5    2.29    1.36
  -5  -3  -5    3.71    1.19
  -5  -3  -5    1.96    1.18
  -5  -3  -5    2.73    1.88
   5  -3   5    3.42    1.42
   5  -3   5    2.98    1.58
   5  -3   5    1.33    2.37
   5   3   6  452.88   27.79
   5   3   6  413.19   27.76
  -5  -3  -6  470.82   27.79
  -5  -3  -6  453.70   27.76
  -5  -3  -6  416.41   27.87
   5  -3   6  429.63   27.95
  -5  -3  -7    3.84    2.20
   5  -3   7    5.14    2.55
  -5  -3  -8  220.65   14.23
   5  -3   9   19.40    2.81
   5  -3  10   11.27    2.66
  -5  -3 -11   25.32    2.90
   5  -3  11   26.60    3.09
  -5  -3 -12   34.25    3.17
   5  -3  12   28.83    3.27
  -5  -3 -13   13.18    2.62
   5  -3  13   17.74    2.70
  -5  -3 -14   17.57    2.69
   5  -3  14   13.51    2.51
  -5  -3 -15    0.48    2.35
   5  -3  15   -7.21    2.43
  -5  -3 -16  212.18   13.32
   5  -3  16  196.69   13.24
  -5  -3 -17   -5.67    2.41
   5  -3  17    2.97    2.31
  -5  -4   0   23.87    1.92
  -5  -4   0   26.33    1.91
  -5  -4   0   30.21    2.57
   5  -4   0   27.01    2.29
   5  -4   0   26.53    2.73
   5   4   1  160.07   10.58
  -5  -4  -1  165.36   10.36
  -5  -4  -1  162.10   10.36
  -5  -4  -1  172.44   10.63
   5  -4   1  161.76   10.41
   5  -4   1  165.50   10.42
   5  -4   1  157.84   10.48
   5   4   2  291.30   16.64
   5   4   2  236.11   16.62
  -5  -4  -2  290.23   16.60
  -5  -4  -2  277.00   16.59
   5  -4   2  255.62   16.60
   5  -4   2  265.73   16.62
   5  -4   2  224.70   16.59
   5   4   3   54.69    4.01
   5   4   3   51.90    3.91
  -5  -4  -3   58.05    3.92
  -5  -4  -3   65.53    3.94
   5  -4   3   62.16    4.02
   5  -4   3   58.62    4.01
   5  -4   3   58.58    4.58
   5   4   4  562.01   34.33
  -5  -4  -4  584.33   34.29
  -5  -4  -4  574.02   34.28
  -5  -4  -4  523.45   34.45
   5  -4   4  501.41   34.30
   5  -4   4  512.12   34.30
   5  -4   4  552.38   34.58
   5   4   5    8.24    1.74
  -5  -4  -5    7.55    1.35
  -5  -4  -5    8.33    1.26
  -5  -4  -5    8.62    2.10
   5  -4   5    4.84    2.48
  -5  -4  -6    0.33    1.23
  -5  -4  -6    2.08    1.12
  -5  -4  -6    0.81    2.12
   5  -4   6    0.80    2.49
  -5  -4  -7   25.82    2.96
   5  -4   7   27.15    3.20
  -5  -4  -8   93.29    6.47
  -5  -4  -9    7.41    2.24
   5  -4   9    8.00    2.67
  -5  -4 -10  268.13   17.24
   5  -4  11   39.24    3.72
  -5  -4 -12  293.37   19.75
   5  -4  12  326.90   19.83
  -5  -4 -13    9.15    2.56
   5  -4  13    9.61    2.56
  -5  -4 -14    9.07    2.58
   5  -4  14   10.46    2.37
  -5  -4 -15   46.09    3.74
   5  -4  15   36.52    3.56
   5  -4  16   11.98    2.60
  -5  -4 -17    0.28    2.35
   5  -4  17    2.21    2.32
   5   5   0  188.44   10.95
  -5  -5   0  175.04   10.85
   5  -5   0  182.58   10.70
   5  -5   0  182.94   10.71
   5  -5   0  133.95   10.56
   5  -5   0  178.83   11.04
   5   5   1   44.53    3.09
  -5  -5  -1   35.25    2.92
  -5  -5  -1   39.05    2.94
  -5  -5  -1   40.95    3.39
   5  -5   1   46.82    3.11
   5  -5   1   47.64    3.14
   5  -5   1   39.11    3.53
   5   5   2   68.89    4.48
  -5  -5  -2   62.60    4.34
  -5  -5  -2   65.07    4.32
  -5  -5  -2   62.65    4.71
   5  -5   2   66.20    4.46
   5  -5   2   66.48    4.47
   5  -5   2   57.34    4.87
  -5  -5  -3    2.05    1.11
  -5  -5  -3    2.48    1.24
  -5  -5  -3    1.99    1.85
   5  -5   3    3.05    2.23
  -5  -5  -4    1.03    1.12
  -5  -5  -4    0.53    1.17
  -5  -5  -4    1.63    1.91
  -5  -5  -5   -0.87    1.13
  -5  -5  -5    0.00    1.18
   5  -5   5    1.67    2.41
  -5  -5  -6  259.66   16.65
  -5  -5  -7   18.91    2.55
   5  -5   7   19.91    2.93
  -5  -5  -8  140.04    9.66
   5  -5   8  155.42    9.82
  -5  -5  -9    1.86    2.23
   5  -5   9    3.02    2.55
  -5  -5 -10   10.92    2.42
   5  -5  10   11.49    2.70
  -5  -5 -11   14.22    2.54
   5  -5  11   18.24    2.85
  -5  -5 -12   57.12    4.55
  -5  -5 -13    8.71    2.37
   5  -5  13    4.32    2.48
  -5  -5 -14   31.88    3.14
   5  -5  14   24.51    3.16
  -5  -5 -15    0.61    2.29
   5  -5  15    0.00    2.17
  -5  -5 -16   70.46    5.31
   5  -5  16   71.07    5.29
   5   6   0    1.90    1.75
  -5  -6   0    1.91    1.16
  -5  -6   0    2.07    1.92
   5  -6   0    0.83    1.61
   5  -6   0    0.80    1.64
   5  -6   0    1.37    2.20
   5   6   1   25.06    2.22
  -5  -6  -1   18.50    1.87
  -5  -6  -1   16.88    2.49
   5  -6   1   19.37    2.73
  -5  -6  -2   75.12    5.17
  -5  -6  -2   80.93    5.13
  -5  -6  -2   74.93    5.44
   5  -6   2   76.08    5.66
  -5  -6  -3    7.45    1.30
  -5  -6  -3    4.83    1.30
  -5  -6  -3    6.58    2.05
   5  -6   3    5.49    2.38
  -5  -6  -5   52.83    4.29
   5  -6   5   59.89    4.51
  -5  -6  -6   22.54    2.70
   5  -6   7   72.49    5.40
  -5  -6  -8   10.10    2.42
   5  -6   8   11.76    2.64
  -5  -6  -9    1.19    2.25
   5  -6   9    2.67    2.52
  -5  -6 -10  170.85   11.33
   5  -6  10  173.31   11.37
  -5  -6 -11   18.34    2.68
   5  -6  11   21.08    2.94
  -5  -6 -12   86.50    6.19
   5  -6  12   88.12    6.28
  -5  -6 -13   35.22    3.38
   5  -6  13   28.11    3.25
   5  -6  14   10.62    2.59
  -5  -6 -15   55.48    4.37
   5  -6  15   51.41    4.22
  -5  -7  -1   38.12    3.36
   5  -7   1   37.52    3.54
  -5  -7  -2  117.68    7.90
   5  -7   2  118.07    8.00
  -5  -7  -3   16.67    2.46
   5  -7   3   20.55    2.86
  -5  -7  -4    0.92    2.05
   5  -7   4    0.82    2.46
  -5  -7  -5   -1.79    2.15
   5  -7   5    1.57    2.48
  -5  -7  -6  108.68    7.40
   5  -7   6  108.27    7.50
  -5  -7  -7    1.31    2.07
   5  -7   7   -7.14    2.54
  -5  -7  -8   17.17    2.55
   5  -7   9   12.48    2.76
  -5  -7 -10    2.64    2.25
   5  -7  10    2.26    2.47
  -5  -7 -11    5.62    2.34
   5  -7  11    9.62    2.55
  -5  -7 -12   -1.72    2.33
   5  -7  12    2.77    2.50
  -5  -7 -13    6.77    2.56
   5  -7  13    5.99    2.47
  -5  -7 -14   43.67    4.03
   5  -7  14   53.34    4.11
  -5  -8   0    2.66    2.01
   5  -8   1    1.04    2.38
  -5  -8  -2    1.80    2.19
   5  -8   2    2.51    2.38
  -5  -8  -3    9.66    2.17
   5  -8   3    7.72    2.57
  -5  -8  -4   35.46    3.17
   5  -8   4   31.76    3.38
  -5  -8  -5    8.86    2.22
   5  -8   5    4.56    2.62
  -5  -8  -6    4.57    2.24
   5  -8   6    4.98    2.50
  -5  -8  -7    2.34    2.25
   5  -8   7    2.46    2.44
  -5  -8  -8   -3.25    2.29
   5  -8   8    0.27    2.46
  -5  -8  -9    3.13    2.16
   5  -8   9   -1.27    2.46
  -5  -8 -10    3.97    2.26
  -5  -8 -11    2.40    2.29
   5  -8  11    1.67    2.38
  -5  -8 -12    1.39    2.13
   5  -8  12    0.00    2.43
  -5  -8 -13    1.31    2.35
   5  -8  13    2.16    2.34
  -5  -8 -14   21.62    2.83
  -5  -9   0   66.55    4.99
   5  -9   0   69.53    5.15
  -5  -9  -1   85.25    6.12
   5  -9   1   89.37    6.26
  -5  -9  -2   47.57    3.93
   5  -9   2   48.66    4.22
  -5  -9  -4    0.10    2.14
   5  -9   4   -5.52    2.59
  -5  -9  -5   98.56    6.90
   5  -9   5  101.94    7.08
  -5  -9  -6   19.75    2.61
   5  -9   6   19.11    2.96
  -5  -9  -7   30.59    3.12
   5  -9   7   32.34    3.36
  -5  -9  -8   23.43    2.88
   5  -9   8   21.40    3.03
  -5  -9  -9   66.31    4.79
   5  -9   9   57.78    4.83
  -5  -9 -10    7.60    2.40
   5  -9  10    4.92    2.46
  -5  -9 -11   85.76    5.92
   5  -9  11   79.09    5.98
  -5 -10   0   21.09    2.69
   5 -10   0   24.78    3.04
  -5 -10  -1    9.17    2.30
   5 -10   1    9.80    2.66
  -5 -10  -2   74.07    5.47
   5 -10   2   76.72    5.64
  -5 -10  -3   -4.00    2.22
   5 -10   3   -5.86    2.68
  -5 -10  -4  138.09    9.04
   5 -10   4  131.54    9.18
  -5 -10  -5   67.80    5.00
   5 -10   6   10.30    2.73
  -5 -10  -7    4.47    2.33
   5 -10   7    6.61    2.60
  -5 -10  -8   90.71    6.21
   5 -10   8   83.34    6.28
  -5 -10  -9    0.31    2.15
   5 -10   9   -1.34    2.48
  -5 -10 -10   58.97    4.35
   5 -10  10   50.65    4.39
  -5 -10 -11   19.31    2.52
   5 -10  11   10.54    2.61
  -5 -11   0   27.28    2.85
   5 -11   0   23.93    3.21
  -5 -11  -1   58.08    4.34
   5 -11   1   51.28    4.65
  -5 -11  -2   30.83    3.17
   5 -11   2   31.09    3.43
  -5 -11  -3    1.55    2.22
   5 -11   3    1.38    2.73
  -5 -11  -4   31.36    3.17
   5 -11   4   31.13    3.46
  -5 -11  -5   88.20    6.14
   5 -11   5   85.48    6.35
  -5 -11  -6   98.43    6.56
   5 -11   6   87.74    6.67
  -5 -11  -7   98.98    6.69
   5 -11   7   92.21    6.83
  -5 -11  -9   20.80    2.71
   5 -11   9   16.33    2.79
  -5 -12   0    0.09    2.16
   5 -12   0    0.41    2.66
  -5 -12  -2   49.02    3.98
   5 -12   2   45.07    4.24
  -5 -12  -3   13.45    2.47
   5 -12   3    9.24    2.82
  -5 -12  -4   67.99    4.89
   5 -12   4   59.50    5.10
  -5 -12  -5   27.52    3.00
   5 -12   5   26.89    3.28
  -5 -12  -6   14.39    2.55
   5 -12   6   19.58    2.89
  -5 -12  -7    0.87    2.21
   5 -12   7   -0.20    2.61
  -5 -13   0   12.50    2.42
   5 -13   0   14.53    3.03
  -5 -13  -1   43.35    3.61
   5 -13   1   36.39    4.01
  -5 -13  -2    0.54    2.25
   5 -13   2    3.80    2.72
   5 -13   3   38.67    3.87
   5 -13   5    2.48    2.59
   5 -14   0    0.67    2.65
   6   0   0  268.07   18.37
  -6   0   0  286.44   18.03
   6   0   1    0.22    1.81
  -6   0  -1    0.71    1.96
   6   0   2   21.22    2.37
  -6   0  -2   18.90    2.40
   6   0   3    0.94    1.98
  -6   0  -3   -3.08    1.94
   6   0   4   -1.84    0.67
   6   0   4   -0.98    1.93
  -6   0  -4    1.32    1.85
   6   0   5    0.16    1.05
   6   0   5    0.75    2.04
  -6   0  -5   -0.25    1.84
   6   0   6  228.55   13.49
  -6   0  -6  198.25   13.29
  -6   0  -6  206.87   13.31
   6   0   7    2.37    2.40
  -6   0  -7    0.94    2.03
   6   0   8  124.28    8.42
  -6   0  -8  125.44    8.32
   6   0   9   -2.73    2.33
  -6   0  -9   -2.46    2.09
   6   0  10   13.18    2.60
  -6   0 -10   11.45    2.36
   6   1   0   18.77    2.23
  -6  -1   0   16.56    2.34
   6   1   1   32.13    3.10
  -6   1  -1   37.78    3.08
   6  -1   1   38.56    3.17
   6   1   2   80.25    5.40
  -6  -1  -2   79.00    5.45
  -6   1  -2   73.75    5.40
   6  -1   2   77.01    5.48
  -6  -1  -3   30.59    2.83
   6  -1   3   28.55    2.96
   6   1   4  274.97   17.60
  -6  -1  -4  267.35   17.60
  -6   1  -4  275.81   17.59
   6  -1   4  286.58   17.71
   6   1   5    3.46    1.10
   6   1   5    4.81    1.93
  -6  -1  -5    2.61    1.07
  -6  -1  -5    2.87    1.17
  -6  -1  -5    6.21    2.07
  -6   1  -5    1.75    1.79
   6  -1   5    4.60    0.97
   6  -1   5    5.06    2.21
   6   1   6   25.70    2.78
  -6  -1  -6   25.12    2.82
  -6   1  -6   26.04    2.49
   6  -1   6   29.32    2.98
   6   1   7    7.95    2.24
  -6  -1  -7    7.01    2.26
  -6   1  -7   10.82    1.87
   6  -1   7    4.33    2.70
   6   1   8    8.24    2.33
  -6   1  -8    8.77    1.92
   6  -1   8    9.31    2.59
  -6  -1  -9    1.46    2.29
   6  -1   9    1.57    2.42
  -6  -1 -10    5.94    2.28
   6  -1  10    7.24    2.55
  -6  -1 -11   13.95    2.49
   6  -1  11   10.78    2.61
  -6  -2   0   26.13    2.73
   6  -2   0   23.50    2.66
  -6  -2  -1    6.77    2.15
   6  -2   1   11.87    2.26
   6   2   2    0.18    1.95
  -6  -2  -2    0.85    1.92
   6  -2   2    2.08    2.18
   6   2   3    8.50    1.87
  -6   2  -3    8.86    1.64
   6  -2   3    2.39    0.64
   6   2   4    4.87    0.94
   6   2   4    8.09    1.80
  -6  -2  -4    5.60    0.98
  -6  -2  -4    7.65    1.07
  -6  -2  -4    5.05    2.08
  -6   2  -4    9.35    1.69
   6  -2   4    3.54    1.03
   6  -2   4    8.28    2.38
   6   2   5    0.87    1.14
   6   2   5    2.26    1.78
  -6  -2  -5    0.07    1.08
  -6  -2  -5    0.29    1.18
  -6  -2  -5    1.17    2.07
  -6   2  -5    4.34    1.58
   6  -2   5    0.85    2.33
  -6  -2  -6  392.79   24.78
   6  -2   6  386.35   24.83
  -6  -2  -7   53.42    4.17
   6  -2   7   48.25    4.34
  -6  -2  -8  233.99   15.12
   6  -2   9    3.79    2.62
   6  -2  10    4.04    2.58
  -6  -2 -11   14.99    2.62
   6  -2  11   17.86    2.85
  -6  -2 -12    0.11    2.32
   6  -2  12    1.68    2.48
  -6  -2 -13    2.58    2.30
   6  -2  13    0.46    2.25
   6   3   0   12.49    1.96
  -6  -3   0   16.20    2.36
   6  -3   0   14.85    2.25
   6  -3   0   15.41    2.50
   6   3   1   18.30    2.18
  -6  -3  -1   14.18    2.31
   6  -3   1   16.10    2.27
   6  -3   1   14.77    2.60
   6   3   2   43.23    3.50
  -6  -3  -2   44.71    3.68
   6  -3   2   47.20    3.91
[truncated: 16,722 more chars]
